# Supplementary material for: Progress towards a public chemogenomic set for protein kinases and a call for contributions
Source: PubMed Central journal article supplement (PMC5540273; doi:10.1371/journal.pone.0181585), 2017-08-02
Supplement: pone.0181585.s002.pdf [file pone.0181585.s002.pdf]

| Compound Name | Chemotype                                  | GINI Criteria Met | Entropy Criteria Met | S(10) Criteria Met | Entropy 1000nM | GINI 1000nM | S(10) | # kinases >90% Inh 1000nM | Kinases >90%Inh 1000nM                            |
|---------------|--------------------------------------------|-------------------|----------------------|--------------------|----------------|-------------|-------|---------------------------|---------------------------------------------------|
| GW589961A     | Benzimidazolyl_diaryl_ureas                | Y                 | N                    | Y                  | 3.073          | 0.773       | 0.005 | 1                         | [KIT]                                             |
| GW700494A     | Benzimidazolyl_diaryl_ureas                | Y                 | N                    | Y                  | 2.992          | 0.769       | 0.005 | 1                         | [KIT]                                             |
| GSK1511931A   | 2,4-dianilino_pyrrolopyrimidines           | Y                 | N                    | Y                  | 2.625          | 0.763       | 0.005 | 1                         | [PYK2]                                            |
| SB-675259-M   | 3-amino_pyrazolopyridazines                | Y                 | N                    | Y                  | 2.822          | 0.820       | 0.010 | 2                         | [CDK2/cyclinA, DYRK1A]                            |
| GSK2186269A   | 2,4-dianilino_pyrrolopyrimidines           | Y                 | N                    | Y                  | 2.001          | 0.762       | 0.015 | 3                         | [IGF1R, INSR, IRR]                                |
| GSK614526A    | Furazan_benzimidazoles                     | Y                 | N                    | Y                  | 2.309          | 0.769       | 0.021 | 4                         | [AKT1, IKKE, AKT3, PKC-eta]                       |
| SB-630812     | 4-pyridyl_ortho-aryl_azoles                | N                 | Y                    | Y                  | 1.639          | 0.741       | 0.005 | 1                         | [LOK]                                             |
| GSK2219385A   | 2,4-dianilino_pyrrolopyrimidines           | N                 | Y                    | Y                  | 0.503          | 0.740       | 0.005 | 1                         | [INSR]                                            |
| GSK317315A    | Benzimidazole_N-thiophenes                 | N                 | Y                    | Y                  | 0.814          | 0.726       | 0.005 | 1                         | [PLK1]                                            |
| GSK200398A    | Anilino_thienopyrimidines                  | N                 | Y                    | Y                  | 0.343          | 0.723       | 0.005 | 1                         | [ERBB4]                                           |
| GSK238583A    | Anilino_thienopyrimidines                  | N                 | Y                    | Y                  | 0.372          | 0.678       | 0.005 | 1                         | [ERBB4]                                           |
| GSK317314A    | Benzimidazole_N-thiophenes                 | N                 | Y                    | Y                  | 1.624          | 0.660       | 0.005 | 1                         | [PLK1]                                            |
| GW280670X     | Oxindoles                                  | N                 | Y                    | Y                  | 1.231          | 0.639       | 0.005 | 1                         | [CDK2/cyclinA]                                    |
| GW572399X     | 2-amino_oxazoles                           | N                 | Y                    | Y                  | 1.247          | 0.611       | 0.005 | 1                         | [CDK2/cyclinA]                                    |
| GSK182497A    | Anilino_thienopyrimidines                  | N                 | Y                    | Y                  | 0.481          | 0.597       | 0.005 | 1                         | [ERBB4]                                           |
| GW577921A     | 2-amino_oxazoles                           | N                 | Y                    | Y                  | 1.589          | 0.577       | 0.005 | 1                         | [KIT]                                             |
| GSK571989A    | Benzimidazole_N-thiophenes                 | N                 | Y                    | Y                  | 1.563          | 0.567       | 0.005 | 1                         | [PLK1]                                            |
| GW301888X     | 4-anilino_quinazolines_and_related         | N                 | Y                    | Y                  | 0.471          | 0.557       | 0.005 | 1                         | [ERBB4]                                           |
| GR269666A     | 4-anilino_quinazolines_and_related         | N                 | Y                    | Y                  | 0.527          | 0.506       | 0.005 | 1                         | [ERBB4]                                           |
| GW827106X     | 2-aryl_3-pyridimidinyl_pyrazolopyridazines | N                 | Y                    | Y                  | 1.468          | 0.745       | 0.010 | 2                         | [ERBB4, YES]                                      |
| GW694234A     | Benzimidazolyl_diaryl_ureas                | N                 | Y                    | Y                  | 1.222          | 0.697       | 0.010 | 2                         | [DDR2, KIT]                                       |
| GSK238063A    | Anilino_thienopyrimidines                  | N                 | Y                    | Y                  | 0.433          | 0.683       | 0.010 | 2                         | [EGFR, ERBB4]                                     |
| GSK192082A    | Anilino_thienopyrimidines                  | N                 | Y                    | Y                  | 0.770          | 0.594       | 0.010 | 2                         | [EGFR, ERBB4]                                     |
| GSK326090A    | Benzimidazole_N-thiophenes                 | N                 | Y                    | Y                  | 1.514          | 0.735       | 0.015 | 3                         | [NEK9, PLK1, LOK]                                 |
| GSK1392956A   | 2,4-dianilino_pyrrolopyrimidines           | N                 | Y                    | Y                  | 1.591          | 0.680       | 0.015 | 3                         | [IGF1R, INSR, PYK2]                               |
| GW770249X     | Fuopyrimidines_and_related                 | N                 | Y                    | Y                  | 1.574          | 0.714       | 0.021 | 4                         | [PDGFRA, MUSK, KIT, TRKA]                         |
| GSK619487A    | Furazan_benzimidazoles                     | N                 | Y                    | N                  | 0.823          | 0.679       | 0.026 | 5                         | [AKT1, IKKE, AKT3, PKC-eta, AKT2]                 |
| GSK2213727A   | 2,4-dianilino_pyrrolopyrimidines           | N                 | Y                    | N                  | 1.082          | 0.723       | 0.036 | 7                         | [IGF1R, PYK2, LTK, IRR, PLK1, LRRK2, INSR]        |
| GSK2110236A   | 2,4-dianilino_pyrrolopyrimidines           | N                 | Y                    | N                  | 1.156          | 0.743       | 0.041 | 8                         | [IGF1R, LTK, PYK2, IRR, PLK1, TSSK2, TSSK1, INSR] |
| GW693917A     | Benzimidazolyl_diaryl_ureas                | N                 | N                    | Y                  | 3.475          | 0.749       | 0.005 | 1                         | [EPHA2]                                           |
| GSK248233A    | Furazan_benzimidazoles                     | N                 | N                    | Y                  | 3.390          | 0.737       | 0.005 | 1                         | [p70s6K1]                                         |
| GW678313X     | 2-amino_oxazoles                           | N                 | N                    | Y                  | 3.423          | 0.737       | 0.005 | 1                         | [KIT]                                             |
| GW683134A     | Benzimidazolyl_diaryl_ureas                | N                 | N                    | Y                  | 3.633          | 0.730       | 0.005 | 1                         | [KIT]                                             |
| GSK1751853A   | 2,4-dianilino_pyrrolopyrimidines           | N                 | N                    | Y                  | 3.019          | 0.702       | 0.005 | 1                         | [PYK2]                                            |
| SB-220025-A   | 4-pyrimidinyl_ortho-aryl_azoles            | N                 | N                    | Y                  | 2.653          | 0.701       | 0.005 | 1                         | [P38alpha]                                        |
| GW435821X     | 3-vinyl_pyridines                          | N                 | N                    | Y                  | 3.455          | 0.697       | 0.005 | 1                         | [IKKE]                                            |
| GW819077X     | 2H-3_pyrimidinyl_pyrazolopyridazines       | N                 | N                    | Y                  | 2.763          | 0.693       | 0.005 | 1                         | [CLK2]                                            |

|               |                                            |   |   |   |       |       |       |   |                  |
|---------------|--------------------------------------------|---|---|---|-------|-------|-------|---|------------------|
| GW804482X     | Benzimidazole_N-thiophenes                 | N | N | Y | 1.815 | 0.691 | 0.005 | 1 | [PLK1]           |
| GW301784X     | Oxindoles                                  | N | N | Y | 3.679 | 0.681 | 0.005 | 1 | [CDK2/cyclinA]   |
| GW282449A     | 4-anilino_quinazolines_and_related         | N | N | Y | 3.064 | 0.681 | 0.005 | 1 | [ERBB4]          |
| GW632580X     | 3-benzyl_pyrimidines                       | N | N | Y | 1.787 | 0.681 | 0.005 | 1 | [FMS]            |
| GSK299115A    | Indazole-5-carboxamides                    | N | N | Y | 3.115 | 0.675 | 0.005 | 1 | [ROCK1]          |
| GW576924A     | 4-anilino_quinazolines_and_related         | N | N | Y | 2.404 | 0.674 | 0.005 | 1 | [EGFR]           |
| SB-236687     | 4-pyrimidinyl_ortho-aryl_azoles            | N | N | Y | 3.403 | 0.672 | 0.005 | 1 | [P38alpha]       |
| GW833373X     | 2-aryl_3-pyridimidinyl_pyrazolopyridazines | N | N | Y | 3.738 | 0.670 | 0.005 | 1 | [YES]            |
| GW335962X     | Oxindoles                                  | N | N | Y | 3.557 | 0.669 | 0.005 | 1 | [KIT]            |
| GW439255X     | 3-vinyl_pyridines                          | N | N | Y | 3.399 | 0.665 | 0.005 | 1 | [IKKE]           |
| SB-772077-B   | Furazan_benzimidazoles                     | N | N | Y | 3.542 | 0.661 | 0.005 | 1 | [PIM1]           |
| GW575533A     | 2-amino_oxazoles                           | N | N | Y | 3.220 | 0.659 | 0.005 | 1 | [KIT]            |
| GW807982X     | 2H-3_pyrimidinyl_pyrazolopyridazines       | N | N | Y | 2.237 | 0.655 | 0.005 | 1 | [CLK2]           |
| GW282974X     | 4-anilino_quinazolines_and_related         | N | N | Y | 2.519 | 0.654 | 0.005 | 1 | [ERBB4]          |
| GW811761X     | 2H-3_pyrimidinyl_pyrazolopyridazines       | N | N | Y | 2.380 | 0.649 | 0.005 | 1 | [CLK2]           |
| GW843682X     | Benzimidazole_N-thiophenes                 | N | N | Y | 3.030 | 0.644 | 0.005 | 1 | [PLK1]           |
| GW709042A     | Benzimidazolyl_diaryl_ureas                | N | N | Y | 3.738 | 0.643 | 0.005 | 1 | [RET]            |
| GSK270822A    | 2Indazole-5-carboxamides                   | N | N | Y | 3.762 | 0.640 | 0.005 | 1 | [ROCK1]          |
| GW829906X     | 2-aryl_3-pyridimidinyl_pyrazolopyridazines | N | N | Y | 3.831 | 0.639 | 0.005 | 1 | [YES]            |
| GW276655X     | Oxindoles                                  | N | N | Y | 3.655 | 0.639 | 0.005 | 1 | [CDK2/cyclinA]   |
| GW830900A     | 2,4-diamino_pyrimidines                    | N | N | Y | 3.138 | 0.636 | 0.005 | 1 | [Aurora-C]       |
| GSK949675A    | Furazan_benzimidazoles                     | N | N | Y | 2.953 | 0.632 | 0.005 | 1 | [PKC-eta]        |
| GW830263A     | 2,4-diamino_pyrimidines                    | N | N | Y | 3.714 | 0.628 | 0.005 | 1 | [Aurora-C]       |
| GW805758X     | 2H-3_pyrimidinyl_pyrazolopyridazines       | N | N | Y | 3.547 | 0.621 | 0.005 | 1 | [KIT]            |
| GW569293E     | 4-pyrimidinyl_ortho-aryl_azoles            | N | N | Y | 3.057 | 0.620 | 0.005 | 1 | [P38alpha]       |
| GW513184X     | 4-hydrazinly_pyrazolopyrimidines           | N | N | Y | 3.826 | 0.616 | 0.005 | 1 | [Aurora-A]       |
| GSK237700A    | Benzimidazole_N-thiophenes                 | N | N | Y | 2.742 | 0.607 | 0.005 | 1 | [PLK1]           |
| SB-242717     | 4-pyrimidinyl_ortho-aryl_azoles            | N | N | Y | 2.566 | 0.601 | 0.005 | 1 | [P38alpha]       |
| GW406108X     | Oxindoles                                  | N | N | Y | 3.719 | 0.585 | 0.005 | 1 | [CLK2]           |
| GW814408X     | 4-hydrazinly_pyrazolopyrimidines           | N | N | Y | 4.057 | 0.581 | 0.005 | 1 | [Aurora-C]       |
| SB-278538     | 4-pyrimidinyl_ortho-aryl_azoles            | N | N | Y | 2.871 | 0.581 | 0.005 | 1 | [P38alpha]       |
| GW784307A     | 4-hydrazinly_pyrazolopyrimidines           | N | N | Y | 4.132 | 0.569 | 0.005 | 1 | [LCK]            |
| GW305074X     | Oxindoles                                  | N | N | Y | 2.369 | 0.569 | 0.005 | 1 | [MAPK3]          |
| GW784752X     | 4-hydrazinly_pyrazolopyrimidines           | N | N | Y | 4.108 | 0.565 | 0.005 | 1 | [GSK3A]          |
| SB-633825     | 4-pyridyl_ortho-aryl_azoles                | N | N | Y | 2.704 | 0.557 | 0.005 | 1 | [LOK]            |
| GW290597X     | Oxindoles                                  | N | N | Y | 3.176 | 0.540 | 0.005 | 1 | [CDK2/cyclinA]   |
| SB-284847-BT  | 4-pyrimidinyl_ortho-aryl_azoles            | N | N | Y | 2.314 | 0.535 | 0.005 | 1 | [P38alpha]       |
| SB-245392     | 4-pyrimidinyl_ortho-aryl_azoles            | N | N | Y | 2.516 | 0.528 | 0.005 | 1 | [P38alpha]       |
| SB-242719     | 4-pyrimidinyl_ortho-aryl_azoles            | N | N | Y | 3.182 | 0.513 | 0.005 | 1 | [P38alpha]       |
| GW576609A     | 4-anilino_quinazolines_and_related         | N | N | Y | 3.035 | 0.511 | 0.005 | 1 | [ERBB4]          |
| GW578748X     | 4-hydrazinly_pyrazolopyrimidines           | N | N | Y | 3.793 | 0.507 | 0.005 | 1 | [IKKE]           |
| GW853606X     | Benzimidazole_N-thiophenes                 | N | N | Y | 2.335 | 0.504 | 0.005 | 1 | [PLK1]           |
| GSK1023156A   | Benzimidazole_N-thiophenes                 | N | N | Y | 2.569 | 0.459 | 0.005 | 1 | [PLK1]           |
| SB-657836-AAA | 3-cyano_thiophenes                         | N | N | Y | 3.007 | 0.419 | 0.005 | 1 | [IKKE]           |
| GSK978744A    | Benzimidazole_N-thiophenes                 | N | N | Y | 2.689 | 0.749 | 0.010 | 2 | [NEK9, PLK1]     |
| SB-223133     | 4-pyrimidinyl_ortho-aryl_azoles            | N | N | Y | 3.041 | 0.743 | 0.010 | 2 | [CK1a, P38alpha] |
| GW673715X     | Benzimidazolyl_diaryl_ureas                | N | N | Y | 2.603 | 0.737 | 0.010 | 2 | [PDGFRA, KIT]    |
| GW627512B     | 2-amino_oxazoles                           | N | N | Y | 1.950 | 0.726 | 0.010 | 2 | [FLT3, KIT]      |
| GW654652C     | 2,4-diamino_pyrimidines                    | N | N | Y | 1.784 | 0.694 | 0.010 | 2 | [FLT4, FLT1]     |
| GW580509X     | 2-amino_oxazoles                           | N | N | Y | 3.325 | 0.682 | 0.010 | 2 | [TNK1, KIT]      |
| GSK1713088A   | 2,4-dianilino_pyrrolopyrimidines           | N | N | Y | 3.020 | 0.678 | 0.010 | 2 | [IGF1R, PYK2]    |
| GSK554170A    | Furazan_benzimidazoles                     | N | N | Y | 2.143 | 0.674 | 0.010 | 2 | [PKC-eta, IKKE]  |

|              |                                      |   |   |   |       |       |       |   |                                    |
|--------------|--------------------------------------|---|---|---|-------|-------|-------|---|------------------------------------|
| GSK579289A   | Benzimidazole_N-thiophenes           | N | N | Y | 2.432 | 0.664 | 0.010 | 2 | [NEK9, PLK1]                       |
| SB-698596-AC | 3-amino_pyrazolopyridazines          | N | N | Y | 1.896 | 0.657 | 0.010 | 2 | [GSK3B, GSK3A]                     |
| GW770220A    | 2,4-diamino_pyrimidines              | N | N | Y | 3.623 | 0.645 | 0.010 | 2 | [Aurora-C, FMS]                    |
| GW429374A    | Oxindoles                            | N | N | Y | 3.321 | 0.644 | 0.010 | 2 | [IKKE, MAP4K4]                     |
| GSK312948A   | Benzimidazole_N-thiophenes           | N | N | Y | 3.200 | 0.625 | 0.010 | 2 | [PLK1, LOK]                        |
| GW784684X    | 1Anilino_thienopyrimidines           | N | N | Y | 3.183 | 0.619 | 0.010 | 2 | [ERBB4]                            |
| GW784684X    | 1Anilino_thienopyrimidines           | N | N | Y | 3.183 | 0.619 | 0.010 | 2 | [ERBB4]                            |
| GW621970X    | 2-amino_oxazoles                     | N | N | Y | 3.292 | 0.614 | 0.010 | 2 | [YES, KIT]                         |
| GW442130X    | Oxindoles                            | N | N | Y | 2.911 | 0.604 | 0.010 | 2 | [Aurora-A, TRKC]                   |
| GW458787A    | 4-anilino_quinazolines_and_related   | N | N | Y | 1.930 | 0.598 | 0.010 | 2 | [EGFR, ERBB4]                      |
| GW631581B    | 2-amino_oxazoles                     | N | N | Y | 2.441 | 0.592 | 0.010 | 2 | [FLT3, KIT]                        |
| GW810372X    | 2H-3_pyrimidinyl_pyrazolopyridazines | N | N | Y | 2.448 | 0.587 | 0.010 | 2 | [HIPK1, CLK2]                      |
| GW780056X    | 2H-3_pyrimidinyl_pyrazolopyridazines | N | N | Y | 3.898 | 0.581 | 0.010 | 2 | [CLK2, KIT]                        |
| GR105659X    | Oxindoles                            | N | N | Y | 3.723 | 0.580 | 0.010 | 2 | [Aurora-C, KIT]                    |
| GW566221A    | 4-anilino_quinazolines_and_related   | N | N | Y | 2.342 | 0.554 | 0.010 | 2 | [EGFR, ERBB4]                      |
| GW784684X    | 1Anilino_thienopyrimidines           | N | N | Y | 3.183 | 0.539 | 0.010 | 2 | [ERBB4]                            |
| GW784684X    | 1Anilino_thienopyrimidines           | N | N | Y | 3.183 | 0.539 | 0.010 | 2 | [ERBB4]                            |
| SB-725317    | 3-amino_pyrazolopyridines            | N | N | Y | 2.201 | 0.520 | 0.010 | 2 | [CDK2/cyclinA, LTK]                |
| GW795486X    | 1Fuopyrimidines_and_related          | N | N | Y | 3.440 | 0.695 | 0.015 | 3 | [FMS, TRKA, KIT]                   |
| GW852849X    | Benzimidazole_N-thiophenes           | N | N | Y | 1.915 | 0.674 | 0.015 | 3 | [PDGFRA, PLK1, LOK]                |
| GW876790X    | Furazan_benzimidazoles               | N | N | Y | 3.490 | 0.655 | 0.015 | 3 | [ROCK1, ROCK2, PKC-eta]            |
| SB-736302    | Furazan_benzimidazoles               | N | N | Y | 4.300 | 0.641 | 0.015 | 3 | [PKC-eta, RSK3]                    |
| SB-736302    | Furazan_benzimidazoles               | N | N | Y | 4.300 | 0.641 | 0.015 | 3 | [PKC-eta, RSK3]                    |
| GW410563A    | 4-anilino_quinazolines_and_related   | N | N | Y | 1.661 | 0.639 | 0.015 | 3 | [PDGFRA, FLT4, FLT1]               |
| GSK1819799A  | 2,4-dianilino_pyrrolopyrimidines     | N | N | Y | 2.826 | 0.637 | 0.015 | 3 | [INSR, LTK, PYK2]                  |
| SB-736302    | Furazan_benzimidazoles               | N | N | Y | 4.300 | 0.628 | 0.015 | 3 | [PKC-eta, RSK3]                    |
| SB-736302    | Furazan_benzimidazoles               | N | N | Y | 4.300 | 0.628 | 0.015 | 3 | [PKC-eta, RSK3]                    |
| GW300657X    | Oxindoles                            | N | N | Y | 1.928 | 0.601 | 0.015 | 3 | [CDK2/cyclinA, CDK3/cyclinE, MELK] |
| GSK319347A   | Benzimidazole_N-thiophenes           | N | N | Y | 2.462 | 0.593 | 0.015 | 3 | [IKKE, MAP4K4, Aurora-C]           |
| GW416981X    | Oxindoles                            | N | N | Y | 4.016 | 0.585 | 0.015 | 3 | [CDK3/cyclinE, IKKE, MELK]         |
| GW300660X    | Oxindoles                            | N | N | Y | 3.382 | 0.576 | 0.015 | 3 | [CDK2/cyclinE, CLK2, MELK]         |
| GW296115X    | Maleimide                            | N | N | Y | 2.762 | 0.527 | 0.015 | 3 | [BRSK2, BRSK1, RSK3]               |
| SB-734117    | Furazan_benzimidazoles               | N | N | Y | 3.499 | 0.722 | 0.021 | 4 | [GSK3A, GSK3B, RSK3, p70s6K1]      |

|            |                                            |   |   |   |       |       |       |   |                                                       |
|------------|--------------------------------------------|---|---|---|-------|-------|-------|---|-------------------------------------------------------|
| GSK938890A | Furazan_benzimidazoles                     | N | N | Y | 3.065 | 0.718 | 0.021 | 4 | [PAK6, PKC-eta, ARK5, AKT2]                           |
| GSK269962B | Furazan_benzimidazoles                     | N | N | Y | 3.185 | 0.690 | 0.021 | 4 | [ROCK1, ROCK2, PKC-eta, p70s6K1]                      |
| GW809897X  | 2,4-diamino_pyrimidines                    | N | N | Y | 2.300 | 0.671 | 0.021 | 4 | [Aurora-A, Aurora-C, FMS, KIT]                        |
| GW771127A  | 2,4-diamino_pyrimidines                    | N | N | Y | 3.209 | 0.666 | 0.021 | 4 | [FMS, KIT, FLT1, FLT4]                                |
| GW827099X  | 2-aryl_3-pyridimidinyl_pyrazolopyridazines | N | N | Y | 3.550 | 0.659 | 0.021 | 4 | [YES, KIT, ERBB4, P38alpha]                           |
| GW396574X  | Oxindoles                                  | N | N | Y | 2.563 | 0.640 | 0.021 | 4 | [Aurora-A, CDK2/cyclinA, CDK3/cyclinE, CDK6/cyclinD3] |
| SB-750140  | Furazan_benzimidazoles                     | N | N | Y | 3.603 | 0.598 | 0.021 | 4 | [RSK3, ROCK1, ROCK2, MRCKA]                           |
| GSK237701A | Benzimidazole_N-thiophenes                 | N | N | Y | 2.009 | 0.584 | 0.021 | 4 | [PDGFRA, NEK9, PDGFRB, PLK1]                          |
| GW297361X  | Oxindoles                                  | N | N | Y | 4.101 | 0.507 | 0.021 | 4 | [CDK2/cyclinA, CDK3/cyclinE, FLT4, KIT]               |
