# Supplementary material for: Progress towards a public chemogenomic set for protein kinases and a call for contributions
Source: PLOS journal article supplement (doi:10.1371/journal.pone.0181585), 2017-08-02
Supplement: S1 (10.1371/journal.pone.0181585.s001) [file journal.pone.0181585.s001.pdf]

|          |     |     |     |     |     |     |     |     |     |     |
|----------|-----|-----|-----|-----|-----|-----|-----|-----|-----|-----|
| BUB1B    |     | yes |     |     |     |     |     |     | yes |     |
| CAMK1    | yes |     | yes | yes | yes | yes | yes | yes | yes | Yes |
| CAMK1D   | yes | yes | yes | yes | yes | yes | yes | yes | yes |     |
| CAMK1G   | yes |     | yes |     | yes |     | yes |     | yes |     |
| CAMK2A   | yes | yes | yes | yes | yes | yes | yes | yes | yes |     |
| CAMK2B   | yes | yes | yes | yes | yes | yes | yes | yes | yes |     |
| CAMK2D   | yes | yes | yes | yes | yes | yes | yes | yes | yes |     |
| CAMK2G   | yes | yes | yes | yes | yes | yes | yes | yes | yes |     |
| CAMK4    | yes | yes | yes | yes | yes | yes |     | yes | yes |     |
| CAMKK1   | yes | yes | yes |     | yes |     | yes | yes | yes |     |
| CAMKK2   | yes | yes | yes |     | yes |     | yes | yes | yes | Yes |
| CAMKV    |     |     |     |     |     |     |     |     |     |     |
| CASK     | yes |     |     |     |     |     |     | yes | yes |     |
| CDC42BPA | yes | yes | yes | yes | yes | yes |     | yes | yes |     |
| CDC42BPB | yes | yes | yes | yes | yes | yes |     | yes | yes |     |
| CDC42BPG | yes |     | yes |     |     |     |     |     | yes |     |
| CDC7     |     | yes | yes |     |     | yes |     | yes | yes |     |
| CDK1     | yes | yes | yes | yes | yes | yes |     | yes | yes |     |
| CDK10    | yes |     |     |     |     |     |     |     |     |     |
| CDK11A   | yes |     |     |     |     |     |     |     |     |     |
| CDK11B   | yes |     |     |     |     |     |     | yes |     |     |
| CDK12    | yes | yes |     |     |     |     |     |     |     |     |
| CDK13    | yes | yes |     |     |     |     |     |     |     |     |
| CDK14    | yes |     |     |     |     |     |     | yes | yes |     |
| CDK15    | yes |     | yes |     |     |     |     |     |     |     |
| CDK16    | yes | yes | yes |     |     |     |     | yes | yes |     |
| CDK17    | yes | yes | yes |     |     |     |     |     | yes |     |
| CDK18    | yes | yes | yes |     |     |     |     |     | yes |     |
| CDK19    | yes | yes | yes |     |     |     |     |     |     |     |
| CDK2     | yes | yes | yes | yes | yes | yes | yes | yes | yes | Yes |
| CDK20    | yes | yes |     |     |     |     |     |     |     |     |
| CDK3     | yes | yes | yes | yes | yes | yes |     | yes | yes |     |
| CDK4     | yes | yes | yes | yes | yes | yes |     |     | yes |     |
| CDK5     | yes | yes | yes | yes | yes | yes | yes | yes | yes |     |
| CDK6     | yes | yes | yes | yes | yes | yes |     |     | yes |     |
| CDK7     | yes | yes | yes | yes | yes | yes | yes | yes | yes |     |
| CDK8     | yes | yes |     |     |     |     | yes | yes | yes |     |
| CDK9     | yes | yes | yes | yes | yes | yes |     | yes | yes | Yes |
| CDKL1    | yes |     |     |     |     |     |     |     |     |     |
| CDKL2    | yes |     |     |     |     |     |     |     |     |     |
| CDKL3    | yes |     |     |     |     |     |     |     |     |     |
| CDKL4    |     |     |     |     |     |     |     |     |     |     |
| CDKL5    | yes |     |     |     |     |     | yes |     |     |     |
| CHEK1    | yes | yes | yes | yes | yes | yes | yes | yes | yes | Yes |
| CHEK2    | yes | yes | yes | yes | yes | yes |     | yes | yes | Yes |



|        |     |     |     |     |     |     |     |     |     |     |
|--------|-----|-----|-----|-----|-----|-----|-----|-----|-----|-----|
| EPHA5  | yes | yes | yes | yes | yes | yes | yes | yes |     |     |
| EPHA6  | yes | yes | yes |     |     | yes | yes | yes | yes |     |
| EPHA7  | yes | yes | yes |     | yes | yes | yes | yes | yes |     |
| EPHA8  | yes | yes | yes | yes | yes | yes | yes | yes |     |     |
| EPHB1  | yes | yes | yes | yes | yes | yes |     | yes | yes | Yes |
| EPHB2  | yes | yes | yes | yes | yes | yes | yes | yes | yes | Yes |
| EPHB3  | yes | yes | yes | yes | yes | yes | yes | yes | yes | Yes |
| EPHB4  | yes | yes | yes | yes | yes | yes | yes | yes | yes | Yes |
| EPHB6  | yes |     |     |     |     |     |     |     |     |     |
| ERBB2  | yes | yes | yes | yes | yes | yes | yes | yes |     |     |
| ERBB3  | yes |     |     |     |     |     |     |     |     |     |
| ERBB4  | yes | yes | yes | yes | yes | yes |     | yes |     | Yes |
| ERN1   | yes |     | yes |     | yes |     |     |     | yes |     |
| ERN2   |     |     | yes |     |     |     |     |     | yes |     |
| FASTK  |     |     |     |     |     |     |     |     | yes |     |
| FER    | yes | yes | yes | yes | yes | yes | yes | yes | yes |     |
| FES    | yes | yes | yes | yes | yes | yes | yes | yes | yes |     |
| FGFR1  | yes | yes | yes | yes | yes | yes |     | yes | yes | Yes |
| FGFR2  | yes | yes | yes | yes | yes | yes | yes | yes | yes |     |
| FGFR3  | yes | yes | yes | yes | yes | yes | yes | yes | yes |     |
| FGFR4  | yes | yes | yes | yes | yes | yes |     | yes | yes |     |
| FGR    | yes | yes | yes | yes | yes | yes | yes | yes | yes |     |
| FLT1   | yes | yes | yes | yes | yes | yes | yes | yes | yes | Yes |
| FLT3   | yes | yes | yes | yes | yes | yes | yes | yes | yes |     |
| FLT4   | yes | yes | yes | yes | yes | yes | yes | yes | yes |     |
| FRK    | yes | yes | yes | yes | yes | yes | yes | yes | yes |     |
| FYN    | yes | yes | yes | yes | yes | yes | yes | yes | yes |     |
| GAK    | yes |     |     |     |     |     |     |     |     |     |
| GRK1   | yes |     | yes |     | yes |     |     | yes | yes |     |
| GRK2   | yes | yes | yes |     | yes |     |     | yes | yes |     |
| GRK3   | yes | yes | yes |     | yes |     |     | yes | yes |     |
| GRK4   | yes | yes | yes |     |     |     |     | yes |     |     |
| GRK5   |     | yes | yes |     | yes |     |     | yes | yes |     |
| GRK6   |     | yes | yes | yes | yes |     |     | yes | yes |     |
| GRK7   | yes | yes | yes | yes | yes |     | yes | yes | yes |     |
| GSG2   | yes | yes | yes | yes | yes | yes |     | yes | yes |     |
| GSK3A  | yes | yes | yes | yes | yes | yes | yes | yes | yes |     |
| GSK3B  | yes | yes | yes | yes | yes | yes |     | yes | yes | Yes |
| GUCY2C |     |     |     |     |     |     |     |     |     |     |
| GUCY2D |     |     |     |     |     |     |     |     |     |     |
| GUCY2F |     |     |     |     |     |     |     |     |     |     |
| HCK    | yes | yes | yes | yes | yes | yes | yes | yes | yes |     |
| HIPK1  | yes | yes | yes | yes | yes | yes |     | yes | yes | Yes |
| HIPK2  | yes | yes | yes | yes | yes |     |     | yes | yes | Yes |
| HIPK3  | yes | yes | yes | yes | yes |     |     | yes | yes | Yes |

|         |     |     |     |     |     |     |     |     |     |     |
|---------|-----|-----|-----|-----|-----|-----|-----|-----|-----|-----|
| HIPK4   | yes | yes | yes | yes | yes |     | yes | yes | yes |     |
| HUNK    | yes |     |     |     |     |     |     |     | yes |     |
| ICK     | yes |     | yes |     | yes |     |     | yes | yes |     |
| IGF1R   | yes | yes | yes | yes | yes | yes | yes | yes | yes | Yes |
| IKBKB   | yes | yes | yes | yes | yes | yes |     | yes | yes | Yes |
| IKBKE   | yes | yes | yes | yes | yes | yes | yes | yes | yes | Yes |
| ILK     |     |     |     |     |     |     |     |     |     |     |
| INSR    | yes | yes | yes | yes | yes | yes | yes | yes | yes | Yes |
| INSRR   | yes | yes | yes | yes | yes | yes | yes | yes | yes | Yes |
| IRAK1   | yes | yes | yes | yes | yes | yes |     | yes |     | Yes |
| IRAK2   | yes |     |     |     |     |     |     |     | yes |     |
| IRAK3   | yes |     |     |     |     |     | yes |     |     |     |
| IRAK4   | yes | yes | yes | yes | yes | yes |     | yes | yes | Yes |
| ITK     | yes | yes | yes | yes | yes | yes | yes | yes | yes |     |
| JAK1    | yes | yes | yes | yes | yes | yes |     | yes | yes |     |
| JAK2    | yes | yes | yes | yes | yes | yes |     | yes | yes |     |
| JAK3    | yes | yes | yes | yes | yes | yes |     | yes | yes |     |
| KALRN   |     |     |     |     |     |     |     |     |     |     |
| KDR     | yes | yes | yes | yes | yes | yes | yes | yes | yes |     |
| KIT     | yes | yes | yes | yes | yes | yes | yes | yes | yes |     |
| KSR1    |     |     | yes |     |     |     |     |     | yes |     |
| KSR2    |     |     | yes |     |     |     |     |     | yes |     |
| LATS1   | yes |     | yes | yes |     |     |     | yes | yes |     |
| LATS2   | yes |     | yes | yes |     | yes |     | yes | yes |     |
| LCK     | yes | yes | yes | yes | yes | yes | yes | yes | yes | Yes |
| LIMK1   | yes | yes | yes |     | yes |     | yes | yes | yes |     |
| LIMK2   | yes | yes | yes |     |     |     |     | yes | yes |     |
| LMTK2   |     |     |     |     |     |     |     |     |     |     |
| LMTK3   |     |     |     |     |     |     |     |     |     |     |
| LRRK1   |     |     |     |     |     |     |     |     |     |     |
| LRRK2   | yes | yes | yes | yes | yes |     |     | yes | yes |     |
| LTK     | yes | yes | yes | yes | yes | yes |     | yes | yes |     |
| LYN     | yes | yes | yes | yes | yes | yes | yes | yes | yes |     |
| MAK     | yes |     | yes |     |     |     |     |     | yes |     |
| MAP2K1  | yes | yes | yes | yes | yes | yes |     | yes | yes | Yes |
| MAP2K2  | yes | yes | yes | yes | yes | yes |     | yes | yes | Yes |
| MAP2K3  | yes |     | yes |     |     | yes |     | yes | yes |     |
| MAP2K4  | yes | yes | yes |     |     | yes |     |     | yes |     |
| MAP2K5  | yes | yes | yes |     |     | yes |     |     | yes |     |
| MAP2K6  | yes | yes | yes |     | yes | yes |     | yes | yes | Yes |
| MAP2K7  | yes | yes | yes |     | yes | yes |     |     | yes |     |
| MAP3K1  | yes | yes | yes |     |     | yes |     |     | yes | Yes |
| MAP3K10 | yes | yes | yes |     | yes | yes | yes | yes | yes |     |
| MAP3K11 | yes | yes | yes |     |     | yes | yes | yes | yes | Yes |
| MAP3K12 | yes |     | yes |     |     | yes |     |     |     |     |

|          |     |     |     |     |     |     |     |     |     |     |
|----------|-----|-----|-----|-----|-----|-----|-----|-----|-----|-----|
| MAP3K13  | yes |     |     |     |     |     |     |     |     |     |
| MAP3K14  | yes | yes | yes |     |     |     |     | yes |     |     |
| MAP3K15  | yes |     |     |     |     |     |     |     |     |     |
| MAP3K19  | yes | yes | yes |     |     |     |     |     | yes |     |
| MAP3K2   | yes | yes | yes |     | yes | yes |     | yes | yes |     |
| MAP3K20  | yes | yes | yes |     | yes |     |     | yes | yes |     |
| MAP3K21  |     | yes | yes |     |     |     |     |     | yes |     |
| MAP3K3   | yes | yes | yes |     |     | yes |     | yes | yes |     |
| MAP3K4   | yes |     |     |     |     | yes |     |     |     |     |
| MAP3K5   | yes | yes | yes |     | yes | yes |     | yes | yes | Yes |
| MAP3K6   | yes |     | yes |     |     |     |     |     | yes |     |
| MAP3K7   | yes | yes | yes | yes | yes | yes |     |     | yes | Yes |
| MAP3K8   |     | yes | yes |     |     | yes |     |     | yes |     |
| MAP3K9   | yes | yes | yes |     | yes | yes | yes |     | yes | Yes |
| MAP4K1   | yes |     | yes |     |     |     |     |     | yes |     |
| MAP4K2   | yes | yes | yes | yes | yes | yes | yes |     | yes | Yes |
| MAP4K3   | yes |     | yes |     |     |     |     |     | yes | Yes |
| MAP4K4   | yes | yes | yes | yes | yes | yes |     |     |     |     |
| MAP4K5   | yes | yes | yes | yes | yes |     |     |     | yes | Yes |
| MAPK1    | yes | yes | yes | yes | yes | yes |     | yes | yes | Yes |
| MAPK10   | yes | yes | yes | yes | yes | yes |     | yes | yes | Yes |
| MAPK11   | yes | yes | yes | yes | yes | yes |     | yes | yes | Yes |
| MAPK12   | yes | yes | yes | yes | yes | yes | yes | yes | yes | Yes |
| MAPK13   | yes | yes | yes | yes | yes | yes | yes | yes | yes | Yes |
| MAPK14   | yes | yes | yes | yes | yes | yes | yes | yes | yes | Yes |
| MAPK15   | yes | yes | yes |     |     |     |     | yes | yes | Yes |
| MAPK3    | yes | yes | yes | yes |     | yes |     | yes | yes | Yes |
| MAPK4    | yes |     |     |     |     |     |     |     |     |     |
| MAPK6    | yes |     |     |     |     |     |     |     | yes |     |
| MAPK7    | yes | yes | yes |     |     | yes |     |     | yes | Yes |
| MAPK8    | yes | yes | yes | yes | yes | yes |     | yes | yes | Yes |
| MAPK9    | yes | yes | yes | yes | yes | yes |     | yes | yes | Yes |
| MAPKAPK2 | yes | yes | yes | yes | yes | yes |     | yes | yes | Yes |
| MAPKAPK3 |     | yes | yes | yes | yes | yes |     | yes | yes | Yes |
| MAPKAPK5 | yes | yes | yes | yes | yes | yes |     | yes | yes | Yes |
| MARK1    | yes | yes | yes | yes | yes | yes | yes | yes | yes | Yes |
| MARK2    | yes | yes | yes | yes | yes | yes | yes | yes | yes | Yes |
| MARK3    | yes | yes | yes | yes |     | yes | yes | yes | yes | Yes |
| MARK4    | yes | yes | yes | yes | yes | yes | yes | yes | yes | Yes |
| MAST1    | yes |     |     |     |     |     |     |     |     |     |
| MAST2    |     |     |     |     |     |     |     |     |     |     |
| MAST3    |     |     |     |     |     |     |     |     |     |     |
| MAST4    |     |     |     |     |     |     |     |     |     |     |
| MASTL    |     |     |     |     |     |     |     |     |     |     |
| MATK     | yes | yes | yes |     |     |     |     | yes | yes |     |

|       |     |     |     |     |     |     |     |     |     |     |
|-------|-----|-----|-----|-----|-----|-----|-----|-----|-----|-----|
| MELK  | yes | yes | yes | yes | yes | yes | yes | yes | yes | Yes |
| MERTK | yes | yes | yes | yes | yes | yes |     | yes | yes |     |
| MET   | yes | yes | yes | yes | yes | yes | yes | yes | yes |     |
| MINK1 | yes | yes | yes | yes | yes | yes |     | yes | yes | Yes |
| MKNK1 | yes | yes | yes | yes |     | yes |     | yes | yes | Yes |
| MKNK2 | yes | yes | yes |     | yes | yes | yes | yes | yes | Yes |
| MLKL  | yes |     |     |     |     |     |     |     |     |     |
| MOK   |     |     |     |     | yes |     |     |     |     |     |
| MOS   |     |     |     |     |     | yes |     |     |     |     |
| MST1R | yes | yes | yes | yes | yes | yes | yes | yes | yes |     |
| MTOR  | yes | yes | yes | yes | yes |     |     | yes |     |     |
| MUSK  | yes | yes | yes | yes | yes | yes | yes | yes | yes |     |
| MYLK  | yes | yes | yes |     | yes |     | yes | yes | yes | Yes |
| MYLK2 | yes | yes | yes |     | yes | yes | yes | yes | yes |     |
| MYLK3 | yes | yes | yes |     |     |     |     |     | yes |     |
| MYLK4 | yes |     | yes |     |     |     | yes |     | yes |     |
| MYO3A | yes |     | yes |     |     |     |     |     | yes |     |
| MYO3B | yes |     | yes |     | yes |     |     | yes | yes |     |
| NEK1  | yes | yes | yes | yes | yes | yes |     | yes | yes |     |
| NEK10 | yes |     |     |     |     |     |     |     |     |     |
| NEK11 | yes | yes | yes |     | yes |     |     |     | yes |     |
| NEK2  | yes | yes | yes | yes | yes | yes |     | yes | yes | Yes |
| NEK3  | yes | ye  | yes |     | yes |     |     |     | yes |     |
| NEK4  | yes | yes | yes |     |     | yes |     | yes | yes |     |
| NEK5  | yes |     | yes |     |     |     |     |     | yes |     |
| NEK6  | yes | yes | yes | yes | yes | yes |     | yes | yes | Yes |
| NEK7  | yes | yes | yes | yes | yes | yes |     | yes | yes |     |
| NEK8  |     |     | yes |     |     |     |     |     | yes |     |
| NEK9  | yes | yes | yes | yes | yes | yes |     | yes | yes |     |
| NIM1K | yes |     | yes |     | yes | yes |     |     | yes |     |
| NLK   | yes | yes | yes |     | yes |     |     | yes | yes |     |
| NPR1  |     |     |     |     |     |     |     |     |     |     |
| NPR2  |     |     |     |     |     |     |     |     |     |     |
| NRBP1 |     |     |     |     |     |     |     |     |     |     |
| NRBP2 |     |     |     |     |     |     |     |     |     |     |
| NRK   |     |     |     |     |     |     |     |     |     |     |
| NTRK1 | yes | yes | yes | yes | yes | yes |     | yes | yes | Yes |
| NTRK2 | yes | yes | yes | yes | yes | yes | yes | yes | yes |     |
| NTRK3 | yes | yes | yes | yes | yes | yes | yes | yes | yes |     |
| NUAK1 | yes | yes | yes | yes | yes | yes | yes | yes | yes | Yes |
| NUAK2 | yes | yes | yes |     | yes | yes | yes | yes | yes |     |
| OBSCN |     |     |     |     |     |     |     |     |     |     |
| OXSRI | yes |     | yes |     |     |     |     |     |     | Yes |
| PAK1  | yes | yes | yes | yes | yes | yes | yes | yes | yes |     |
| PAK2  | yes | yes | yes | yes | yes | yes |     | yes |     | Yes |

|        |     |     |     |     |     |     |     |     |     |     |
|--------|-----|-----|-----|-----|-----|-----|-----|-----|-----|-----|
| PAK3   | yes | yes | yes | yes | yes |     |     | yes | yes |     |
| PAK4   | yes | yes | yes | yes | yes | yes |     | yes | yes | Yes |
| PAK5   | yes | yes | yes | yes | yes | yes |     | yes | yes | Yes |
| PAK6   | yes | yes | yes | yes | yes | yes |     | yes | yes | Yes |
| PASK   | yes | yes | yes | yes | yes | yes |     | yes | yes |     |
| PBK    |     | yes | yes |     |     | yes |     |     | yes |     |
| PDGFRA | yes | yes | yes | yes | yes | yes | yes | yes | yes | Yes |
| PDGFRB | yes | yes | yes | yes | yes | yes | yes | yes | yes |     |
| PDIK1L |     |     |     |     |     |     |     |     |     |     |
| PDK1   |     |     | yes | yes | yes |     |     | yes | yes | Yes |
| PDK2   |     |     | yes |     |     | yes |     |     | yes |     |
| PDK3   |     |     | yes |     |     |     |     |     | yes |     |
| PDK4   |     |     | yes |     | yes | yes |     |     | yes |     |
| PDPK1  | yes | yes |     |     |     | yes | yes |     | yes |     |
| PEAK1  |     |     | yes |     |     |     |     |     | yes |     |
| PHKG1  | yes | yes | yes | yes |     | yes | yes | yes | yes | Yes |
| PHKG2  | yes | yes | yes | yes | yes | yes |     | yes | yes |     |
| PIM1   | yes | yes | yes | yes | yes | yes | yes | yes | yes | Yes |
| PIM2   | yes | yes | yes |     | yes | yes | yes | yes | yes | Yes |
| PIM3   | yes | yes | yes | yes | yes | yes |     |     | yes | Yes |
| PINK1  |     |     |     |     |     |     |     |     |     | Yes |
| PKDCC  |     |     |     |     |     |     |     |     |     |     |
| PKMYT1 | yes | yes |     |     |     |     | yes |     | yes |     |
| PKN1   | yes | yes | yes | yes |     | yes |     | yes | yes |     |
| PKN2   | yes | yes | yes | yes | yes |     |     | yes | yes | Yes |
| PKN3   |     | yes | yes |     |     |     | yes |     | yes |     |
| PLK1   | yes | yes | yes | yes | yes | yes |     | yes | yes | Yes |
| PLK2   | yes | yes | yes | yes | yes | yes |     | yes | yes |     |
| PLK3   | yes | yes | yes | yes | yes | yes |     | yes | yes |     |
| PLK4   | yes | yes | yes | yes |     |     | yes | yes | yes |     |
| PNCK   | yes |     | yes |     | yes |     |     |     | yes |     |
| POMK   |     |     |     |     |     |     |     |     |     |     |
| PRAG1  |     |     |     |     |     |     |     |     |     |     |
| PRKAA1 | yes | yes | yes | yes | yes | yes | yes | yes | yes | Yes |
| PRKAA2 | yes |     | yes | yes | yes | yes | yes | yes | yes | Yes |
| PRKACA | yes | yes | yes | yes | yes | yes | yes | yes | yes | Yes |
| PRKACB | yes |     | yes | yes | yes | yes | yes | yes | yes |     |
| PRKACG |     |     | yes |     |     | yes |     | yes | yes |     |
| PRKCA  |     | yes | yes | yes | yes | yes |     | yes | yes | Yes |
| PRKCB  |     | yes | yes | yes | yes | yes |     | yes | yes |     |
| PRKCD  | yes | yes | yes |     | yes | yes | yes | yes | yes |     |
| PRKCE  | yes | yes | yes | yes | yes | yes | yes | yes | yes |     |
| PRKCG  |     | yes | yes | yes | yes | yes | yes | yes | yes | Yes |
| PRKCH  | yes | yes | yes | yes | yes | yes | yes | yes | yes |     |
| PRKCI  | yes | yes | yes | yes | yes | yes |     | yes | yes |     |



|         |     |     |     |     |     |     |     |     |     |     |
|---------|-----|-----|-----|-----|-----|-----|-----|-----|-----|-----|
| PRKCQ   | yes | yes | yes | yes | yes | yes | yes | yes | yes |     |
| PRKCZ   |     | yes | yes | yes | yes | yes |     | yes | yes | Yes |
| PRKD1   | yes | yes | yes | yes | yes | yes |     | yes |     | Yes |
| PRKD2   | yes | yes | yes | yes | yes | yes | yes | yes | yes |     |
| PRKD3   | yes | yes | yes | yes | yes | yes | yes | yes |     |     |
| PRKDC   |     | yes | yes |     | yes |     |     | yes |     |     |
| PRKG1   | yes | yes | yes | yes | yes | yes | yes | yes | yes |     |
| PRKG2   | yes | yes | yes | yes | yes | yes | yes | yes | yes |     |
| PRKX    | yes | yes | yes | yes | yes | yes | yes | yes | yes |     |
| PRKY    |     |     |     |     |     |     |     |     |     |     |
| PRPF4B  | yes |     |     |     |     |     |     |     |     |     |
| PSKH1   |     |     |     |     |     |     |     |     |     |     |
| PSKH2   |     |     |     |     |     |     |     |     |     |     |
| PTK2    | yes | yes | yes | yes | yes | yes | yes | yes | yes |     |
| PTK2B   | yes | yes | yes | yes | yes | yes | yes | yes | yes |     |
| PTK6    | yes | yes | yes | yes |     | yes | yes | yes | yes | Yes |
| PTK7    |     |     |     |     |     |     |     |     |     |     |
| PXK     |     |     |     |     |     |     |     |     |     |     |
| RAF1    | yes | yes | yes | yes | yes | yes |     | yes | yes |     |
| RET     | yes | yes | yes | yes | yes | yes | yes | yes |     |     |
| RIOK1   | yes |     |     |     |     |     |     |     |     |     |
| RIOK2   | yes |     |     |     |     |     |     |     |     |     |
| RIOK3   | yes |     |     |     |     |     |     |     |     |     |
| RIPK1   | yes |     |     |     |     |     |     |     | yes |     |
| RIPK2   | yes | yes | yes | yes | yes |     | yes | yes | yes | Yes |
| RIPK3   | yes |     | yes |     |     |     |     | yes | yes |     |
| RIPK4   | yes | yes | yes |     |     |     |     |     | yes |     |
| RNASEL  |     |     |     |     |     |     |     |     |     |     |
| ROCK1   | yes | yes | yes | yes | yes | yes |     | yes | yes |     |
| ROCK2   | yes | yes | yes | yes | yes | yes |     | yes | yes | Yes |
| ROR1    |     |     |     |     |     |     |     |     | yes |     |
| ROR2    |     |     |     |     |     |     |     |     | yes |     |
| ROS1    | yes | yes | yes | yes | yes | yes | yes | yes | yes |     |
| RPS6KA1 | yes | yes | yes | yes |     | yes | yes | yes | yes |     |
| RPS6KA2 | yes | yes | yes | yes |     | yes | yes | yes | yes | Yes |
| RPS6KA3 | yes | yes | yes | yes |     | yes | yes | yes | yes | Yes |
| RPS6KA4 | yes | yes | yes | yes | yes | yes | yes | yes | yes |     |
| RPS6KA5 | yes | yes | yes | yes | yes | yes | yes | yes | yes | Yes |
| RPS6KA6 | yes | yes | yes | yes |     | yes | yes | yes | yes |     |
| RPS6KB1 | yes | yes | yes | yes | yes | yes |     | yes | yes | Yes |
| RPS6KB2 |     | yes | yes | yes |     | yes |     |     | yes |     |
| RPS6KC1 |     |     |     |     |     |     |     |     |     |     |
| RPS6KL1 |     |     |     |     |     |     |     |     |     |     |
| RYK     |     |     |     |     |     |     |     |     |     |     |
| SBK1    | yes |     | yes |     |     |     |     |     | yes |     |



|        |     |     |     |     |     |     |     |     |     |     |
|--------|-----|-----|-----|-----|-----|-----|-----|-----|-----|-----|
| STRADB |     |     |     |     |     |     |     |     |     |     |
| STYK1  |     |     |     |     |     |     |     |     |     |     |
| SYK    | yes | yes | yes | yes | yes | yes | yes | yes | yes | Yes |
| TAF1   |     |     |     |     |     |     |     |     |     |     |
| TAOK1  | yes |     | yes |     | yes |     |     | yes | yes | Yes |
| TAOK2  | yes | yes | yes | yes | yes | yes |     | yes | yes |     |
| TAOK3  | yes | yes | yes | yes | yes |     |     | yes | yes |     |
| TBCK   |     |     |     |     |     |     |     |     |     |     |
| TBK1   | yes | yes | yes | yes | yes | yes | yes | yes | yes | Yes |
| TEC    | yes | yes | yes | yes | yes | yes | yes | yes | yes |     |
| TEK    | yes | yes | yes |     | yes | yes | yes | yes | yes | Yes |
| TESK1  | yes |     | yes |     |     |     | yes |     | yes | Yes |
| TESK2  |     |     | yes |     |     |     | yes | yes | yes |     |
| TEX14  |     |     |     |     |     |     |     |     |     |     |
| TGFBR1 | yes | yes | yes |     | yes |     |     | yes | yes | Yes |
| TGFBR2 | yes | yes | yes |     |     |     |     | yes | yes |     |
| TIE1   | yes |     |     |     |     |     | yes |     |     |     |
| TLK1   | yes | yes | yes |     | yes |     |     | yes | yes | Yes |
| TLK2   | yes | yes | yes |     | yes |     |     | yes | yes |     |
| TNIK   | yes |     | yes | yes | yes | yes |     | yes | yes |     |
| TNK1   | yes | yes | yes |     |     | yes | yes |     | yes |     |
| TNK2   | yes | yes | yes | yes | yes | yes | yes | yes | yes |     |
| TNNI3K | yes |     |     |     |     |     | yes |     |     |     |
| TP53RK |     |     |     |     |     |     |     |     |     |     |
| TRIB1  |     |     |     |     |     |     |     |     |     |     |
| TRIB2  |     |     |     |     |     |     |     |     |     |     |
| TRIB3  |     |     |     |     |     |     |     |     |     |     |
| TRIO   |     |     |     |     |     |     |     |     | yes |     |
| TRPM6  | yes |     |     |     |     |     |     |     |     |     |
| TRPM7  |     |     | yes |     | yes |     |     |     |     |     |
| TRRAP  |     |     |     |     |     |     |     |     |     |     |
| TSSK1B | yes | yes | yes | yes | yes | yes |     | yes | yes | Yes |
| TSSK2  |     | yes | yes | yes | yes | yes |     | yes | yes |     |
| TSSK3  | yes |     | yes |     | yes | yes |     |     |     |     |
| TSSK4  |     |     |     |     | yes |     |     |     |     |     |
| TSSK6  |     |     | yes |     |     |     |     |     |     |     |
| TTBK1  |     | yes | yes |     | yes |     |     |     | yes | Yes |
| TTBK2  |     | yes | yes |     | yes |     |     |     | yes | Yes |
| TTK    | yes | yes |     | yes | yes |     |     | yes | yes | Yes |
| TTN    |     |     |     |     |     |     |     |     |     |     |
| TXK    | yes | yes | yes | yes | yes | yes | yes | yes | yes |     |
| TYK2   | yes | yes | yes | yes | yes | yes |     | yes | yes |     |
| TYRO3  | yes | yes | yes | yes | yes | yes |     | yes | yes |     |
| UHMK1  |     |     |     |     |     |     |     |     |     |     |
| ULK1   | yes |     | yes |     | yes |     |     | yes | yes | Yes |
