# Supplementary material for: Progress towards a public chemogenomic set for protein kinases and a call for contributions
Source: PLOS journal article supplement (doi:10.1371/journal.pone.0181585), 2017-08-02
Supplement: S3 (10.1371/journal.pone.0181585.s003) [file journal.pone.0181585.s003.pdf]

| Compound Name | Smiles                                                                                 | %Inh >90 | DiscoverX   | Entrez      | Modifier | Kd (nM) |
|---------------|----------------------------------------------------------------------------------------|----------|-------------|-------------|----------|---------|
|               |                                                                                        |          | Gene Symbol | Gene Symbol |          |         |
| GSK2358994    | <chem>Clc1cccc(Cn2c(nn3c2nc(cc3=O)N2CCOCC2)C2CC2)c1Cl</chem>                           | 2        | PIK3CB      | PIK3CB      | =        | 0.94    |
| GSK2358994    | <chem>Clc1cccc(Cn2c(nn3c2nc(cc3=O)N2CCOCC2)C2CC2)c1Cl</chem>                           | 2        | PIK3CD      | PIK3CD      | =        | 820     |
| GSK2358994    | <chem>Clc1cccc(Cn2c(nn3c2nc(cc3=O)N2CCOCC2)C2CC2)c1Cl</chem>                           | 2        | VPS34       | PIK3C3      | =        | 0.39    |
| GSK350559     | <chem>CS(=O)(=O)Cc1ccc(Nc2nccc(n2)-c2c(nn3ncccc23)-c2cccc(NC(=O)C3CCCCC3)c2)cc1</chem> | 8        | BUB1        | BUB1        | =        | 29      |
| GSK350559     | <chem>CS(=O)(=O)Cc1ccc(Nc2nccc(n2)-c2c(nn3ncccc23)-c2cccc(NC(=O)C3CCCCC3)c2)cc1</chem> | 8        | DDR1        | DDR1        | =        | 23      |
| GSK350559     | <chem>CS(=O)(=O)Cc1ccc(Nc2nccc(n2)-c2c(nn3ncccc23)-c2cccc(NC(=O)C3CCCCC3)c2)cc1</chem> | 8        | FLT3        | FLT3        | =        | 74      |
| GSK350559     | <chem>CS(=O)(=O)Cc1ccc(Nc2nccc(n2)-c2c(nn3ncccc23)-c2cccc(NC(=O)C3CCCCC3)c2)cc1</chem> | 8        | KIT         | KIT         | =        | 110     |
| GSK350559     | <chem>CS(=O)(=O)Cc1ccc(Nc2nccc(n2)-c2c(nn3ncccc23)-c2cccc(NC(=O)C3CCCCC3)c2)cc1</chem> | 8        | LOK         | STK10       | =        | 360     |
| GSK350559     | <chem>CS(=O)(=O)Cc1ccc(Nc2nccc(n2)-c2c(nn3ncccc23)-c2cccc(NC(=O)C3CCCCC3)c2)cc1</chem> | 8        | MEK5        | MAP2K5      | =        | 35      |
| GSK350559     | <chem>CS(=O)(=O)Cc1ccc(Nc2nccc(n2)-c2c(nn3ncccc23)-c2cccc(NC(=O)C3CCCCC3)c2)cc1</chem> | 8        | PDGFRB      | PDGFRB      | =        | 74      |
| GSK350559     | <chem>CS(=O)(=O)Cc1ccc(Nc2nccc(n2)-c2c(nn3ncccc23)-c2cccc(NC(=O)C3CCCCC3)c2)cc1</chem> | 8        | PIP5K1C     | PIP5K1C     | >        | 10000   |
| GSK350559     | <chem>CS(=O)(=O)Cc1ccc(Nc2nccc(n2)-c2c(nn3ncccc23)-c2cccc(NC(=O)C3CCCCC3)c2)cc1</chem> | 8        | PIP5K2C     | PIP4K2C     | =        | 60      |
| GSK350559     | <chem>CS(=O)(=O)Cc1ccc(Nc2nccc(n2)-c2c(nn3ncccc23)-c2cccc(NC(=O)C3CCCCC3)c2)cc1</chem> | 8        | STK36       | STK36       | =        | 67      |
| GSK955403     | <chem>Cc1ccc(NC(=O)Nc2cccc(c2)C(F)(F)F)cc1</chem>                                      | 4        | ACVR1B      | ACVR1B      | >        | 10000   |
| GSK955403     | <chem>Cc1ccc(NC(=O)Nc2cccc(c2)C(F)(F)F)cc1</chem>                                      | 4        | BMPR1A      | BMPR1A      | >        | 10000   |
| GSK955403     | <chem>Cc1ccc(NC(=O)Nc2cccc(c2)C(F)(F)F)cc1</chem>                                      | 4        | IRAK3       | IRAK3       | >        | 10000   |
| GSK955403     | <chem>Cc1ccc(NC(=O)Nc2cccc(c2)C(F)(F)F)cc1</chem>                                      | 4        | KIT         | KIT         | =        | 240     |
| GW345098      | <chem>CCn1cnc2c(N)ncnc12</chem>                                                        | 0        | TRPM6       | TRPM6       | =        | 240     |
| GW630823      | <chem>Cc1ccc(O)cc1Nc1cc(nc2ccc(cc12)-c1ccncc1)C(F)(F)F</chem>                          | 1        | EPHA7       | EPHA7       | >        | 10000   |
| GW630823      | <chem>Cc1ccc(O)cc1Nc1cc(nc2ccc(cc12)-c1ccncc1)C(F)(F)F</chem>                          | 1        | TEC         | TEC         | >        | 10000   |
| GW857175      | <chem>Cc1cccc(n1)-c1nc(Nc2ccc3[nH]ncc3c2)c2cccc2n1</chem>                              | 7        | ACVR1B      | ACVR1B      | =        | 54      |
| GW857175      | <chem>Cc1cccc(n1)-c1nc(Nc2ccc3[nH]ncc3c2)c2cccc2n1</chem>                              | 7        | CSNK2A1     | CSNK2A1     | =        | 100     |
| GW857175      | <chem>Cc1cccc(n1)-c1nc(Nc2ccc3[nH]ncc3c2)c2cccc2n1</chem>                              | 7        | CSNK2A2     | CSNK2A2     | =        | 42      |
| GW857175      | <chem>Cc1cccc(n1)-c1nc(Nc2ccc3[nH]ncc3c2)c2cccc2n1</chem>                              | 7        | JAK1(JH2do  | JAK1        | =        | 650     |
| GW857175      | <chem>Cc1cccc(n1)-c1nc(Nc2ccc3[nH]ncc3c2)c2cccc2n1</chem>                              | 7        | PIKFYVE     | PIKFYVE     | =        | 700     |
| GW857175      | <chem>Cc1cccc(n1)-c1nc(Nc2ccc3[nH]ncc3c2)c2cccc2n1</chem>                              | 7        | PRKD1       | PRKD1       | =        | 19      |
| GW857175      | <chem>Cc1cccc(n1)-c1nc(Nc2ccc3[nH]ncc3c2)c2cccc2n1</chem>                              | 7        | PRKD2       | PRKD2       | =        | 15      |
| GW857175      | <chem>Cc1cccc(n1)-c1nc(Nc2ccc3[nH]ncc3c2)c2cccc2n1</chem>                              | 7        | PRKD3       | PRKD3       | =        | 11      |
| GW857175      | <chem>Cc1cccc(n1)-c1nc(Nc2ccc3[nH]ncc3c2)c2cccc2n1</chem>                              | 7        | TGFBR1      | TGFBR1      | =        | 84      |
| GW869979      | <chem>COc1cc2ncn(-c3cc(OCC4ccc(cc4)S(C)(=O)=O)c(s3)C(N)=O)c2cc1OC</chem>               | 3        | MEK5        | MAP2K5      | =        | 470     |
| GW869979      | <chem>COc1cc2ncn(-c3cc(OCC4ccc(cc4)S(C)(=O)=O)c(s3)C(N)=O)c2cc1OC</chem>               | 3        | PLK1        | PLK1        | =        | 14      |
| GW869979      | <chem>COc1cc2ncn(-c3cc(OCC4ccc(cc4)S(C)(=O)=O)c(s3)C(N)=O)c2cc1OC</chem>               | 3        | PLK2        | PLK2        | =        | 5.9     |
| GW869979      | <chem>COc1cc2ncn(-c3cc(OCC4ccc(cc4)S(C)(=O)=O)c(s3)C(N)=O)c2cc1OC</chem>               | 3        | PLK3        | PLK3        | =        | 100     |
| PFE-PKIS 1    | <chem>O=C1C(Br)=C(OCC2=C(F)C=C(F)C=C2)C=C(C)N1C3=CC(C(N)CC(N)=O)=O)=CC=C3C</chem>      | 2        | p38-alpha   | MAPK14      | =        | 0.23    |
| PFE-PKIS 1    | <chem>O=C1C(Br)=C(OCC2=C(F)C=C(F)C=C2)C=C(C)N1C3=CC(C(N)CC(N)=O)=O)=CC=C3C</chem>      | 2        | p38-beta    | MAPK11      | =        | 10      |

|             |                                                                   |    |             |         |   |       |
|-------------|-------------------------------------------------------------------|----|-------------|---------|---|-------|
| PFE-PKIS 12 | O=C(NCCCC1CCOC1=O)C2=CN=C(NCC3=C(Cl)C=CC(Cl)=C3)N=C2NC4CCCC4      | 2  | CASK        | CASK    | = | 4.6   |
| PFE-PKIS 2  | C1C(C=C1)=CC=C1C2=C(C3=CC=NN3)SC(N4CCOCC4)=C2C#N                  | 6  | PIK3CA      | PIK3CA  | = | 32    |
| PFE-PKIS 2  | C1C(C=C1)=CC=C1C2=C(C3=CC=NN3)SC(N4CCOCC4)=C2C#N                  | 6  | PIK3CB      | PIK3CB  | = | 750   |
| PFE-PKIS 2  | C1C(C=C1)=CC=C1C2=C(C3=CC=NN3)SC(N4CCOCC4)=C2C#N                  | 6  | VPS34       | PIK3C3  | = | 58    |
| PFE-PKIS 21 | FC1=C(F)C=CC(C(NOC[C@H](O)CO)=O)=C1NC2=CC=C(I)C=C2F               | 2  | MEK1        | MAP2K1  | = | 47    |
| PFE-PKIS 21 | FC1=C(F)C=CC(C(NOC[C@H](O)CO)=O)=C1NC2=CC=C(I)C=C2F               | 2  | MEK2        | MAP2K2  | = | 110   |
| PFE-PKIS 25 | CN([C@H]1CN(C(CC#N)=O)CC[C@H]1C)C2=C3C(NC=C3)=NC=N2               | 10 | DCAMKL3     | DCLK3   | = | 26    |
| PFE-PKIS 25 | CN([C@H]1CN(C(CC#N)=O)CC[C@H]1C)C2=C3C(NC=C3)=NC=N2               | 10 | JAK1(JH1do  | JAK1    | = | 3.2   |
| PFE-PKIS 25 | CN([C@H]1CN(C(CC#N)=O)CC[C@H]1C)C2=C3C(NC=C3)=NC=N2               | 10 | JAK2(JH1do  | JAK2    | = | 0.22  |
| PFE-PKIS 25 | CN([C@H]1CN(C(CC#N)=O)CC[C@H]1C)C2=C3C(NC=C3)=NC=N2               | 10 | JAK3(JH1do  | JAK3    | = | 0.13  |
| PFE-PKIS 25 | CN([C@H]1CN(C(CC#N)=O)CC[C@H]1C)C2=C3C(NC=C3)=NC=N2               | 10 | MST3        | STK24   | > | 10000 |
| PFE-PKIS 25 | CN([C@H]1CN(C(CC#N)=O)CC[C@H]1C)C2=C3C(NC=C3)=NC=N2               | 10 | RSK3(Kin.Dc | RPS6KA2 | = | 1300  |
| PFE-PKIS 25 | CN([C@H]1CN(C(CC#N)=O)CC[C@H]1C)C2=C3C(NC=C3)=NC=N2               | 10 | RSK4(Kin.Dc | RPS6KA6 | = | 1400  |
| PFE-PKIS 25 | CN([C@H]1CN(C(CC#N)=O)CC[C@H]1C)C2=C3C(NC=C3)=NC=N2               | 10 | TYK2(JH1do  | TYK2    | = | 6.9   |
| PFE-PKIS 27 | FC1=C(F)C=CC(C(NOCC2CC2)=O)=C1NC3=CC=C(I)C=C3Cl                   | 3  | ICK         | ICK     | > | 10000 |
| PFE-PKIS 27 | FC1=C(F)C=CC(C(NOCC2CC2)=O)=C1NC3=CC=C(I)C=C3Cl                   | 3  | PIK4CB      | PI4KB   | > | 10000 |
| PFE-PKIS 27 | FC1=C(F)C=CC(C(NOCC2CC2)=O)=C1NC3=CC=C(I)C=C3Cl                   | 3  | RIPK4       | RIPK4   | > | 10000 |
| PFE-PKIS 28 | O=C(C1=CN=C(N=C1NC2CCNCC2)NCC3=C(C=CC(Cl)=C3)Cl)NCCCN4C(CCC4)=O   | 3  | CSF1R       | CSF1R   | > | 10000 |
| PFE-PKIS 28 | O=C(C1=CN=C(N=C1NC2CCNCC2)NCC3=C(C=CC(Cl)=C3)Cl)NCCCN4C(CCC4)=O   | 3  | CSNK1E      | CSNK1E  | = | 230   |
| PFE-PKIS 28 | O=C(C1=CN=C(N=C1NC2CCNCC2)NCC3=C(C=CC(Cl)=C3)Cl)NCCCN4C(CCC4)=O   | 3  | MAK         | MAK     | > | 10000 |
| PFE-PKIS 28 | O=C(C1=CN=C(N=C1NC2CCNCC2)NCC3=C(C=CC(Cl)=C3)Cl)NCCCN4C(CCC4)=O   | 3  | RSK1(Kin.Dc | RPS6KA1 | > | 10000 |
| PFE-PKIS 29 | COC(N=C1)=CC=C1C2=CC3=C(C)N=C(N)N=C3N([C@H]4CC[C@H](OCCO)CC4)C2=O | 17 | MTOR        | MTOR    | = | 3.3   |
| PFE-PKIS 29 | COC(N=C1)=CC=C1C2=CC3=C(C)N=C(N)N=C3N([C@H]4CC[C@H](OCCO)CC4)C2=O | 17 | PIK3C2B     | PIK3C2B | = | 1.3   |
| PFE-PKIS 29 | COC(N=C1)=CC=C1C2=CC3=C(C)N=C(N)N=C3N([C@H]4CC[C@H](OCCO)CC4)C2=O | 17 | PIK3C2G     | PIK3C2G | = | 0.92  |
| PFE-PKIS 29 | COC(N=C1)=CC=C1C2=CC3=C(C)N=C(N)N=C3N([C@H]4CC[C@H](OCCO)CC4)C2=O | 17 | PIK3CA      | PIK3CA  | = | 0.45  |
| PFE-PKIS 29 | COC(N=C1)=CC=C1C2=CC3=C(C)N=C(N)N=C3N([C@H]4CC[C@H](OCCO)CC4)C2=O | 17 | PIK3CB      | PIK3CB  | = | 1.7   |
| PFE-PKIS 29 | COC(N=C1)=CC=C1C2=CC3=C(C)N=C(N)N=C3N([C@H]4CC[C@H](OCCO)CC4)C2=O | 17 | PIK3CD      | PIK3CD  | = | 1.6   |
| PFE-PKIS 29 | COC(N=C1)=CC=C1C2=CC3=C(C)N=C(N)N=C3N([C@H]4CC[C@H](OCCO)CC4)C2=O | 17 | PIK3CG      | PIK3CG  | = | 0.27  |
| PFE-PKIS 29 | COC(N=C1)=CC=C1C2=CC3=C(C)N=C(N)N=C3N([C@H]4CC[C@H](OCCO)CC4)C2=O | 17 | PIK4CB      | PI4KB   | = | 46    |

|             |                                                                            |    |             |          |   |       |
|-------------|----------------------------------------------------------------------------|----|-------------|----------|---|-------|
| PFE-PKIS 3  | <chem>COC1=CC(C2=CC3=CN=C(N)N=C3N=C2NC(NC(C)(C)C)=O)=CC(OC)=C1</chem>      | 7  | FGFR1       | FGFR1    | = | 66    |
| PFE-PKIS 3  | <chem>COC1=CC(C2=CC3=CN=C(N)N=C3N=C2NC(NC(C)(C)C)=O)=CC(OC)=C1</chem>      | 7  | FGFR2       | FGFR2    | = | 310   |
| PFE-PKIS 3  | <chem>COC1=CC(C2=CC3=CN=C(N)N=C3N=C2NC(NC(C)(C)C)=O)=CC(OC)=C1</chem>      | 7  | FGFR3       | FGFR3    | = | 110   |
| PFE-PKIS 3  | <chem>COC1=CC(C2=CC3=CN=C(N)N=C3N=C2NC(NC(C)(C)C)=O)=CC(OC)=C1</chem>      | 7  | TNK2        | TNK2     | > | 10000 |
| PFE-PKIS 3  | <chem>COC1=CC(C2=CC3=CN=C(N)N=C3N=C2NC(NC(C)(C)C)=O)=CC(OC)=C1</chem>      | 7  | TYRO3       | TYRO3    | > | 10000 |
| PFE-PKIS 3  | <chem>COC1=CC(C2=CC3=CN=C(N)N=C3N=C2NC(NC(C)(C)C)=O)=CC(OC)=C1</chem>      | 7  | YES         | YES1     | > | 10000 |
| PFE-PKIS 32 | <chem>CC(C1=CN=C(NC2=NC=C(N3CCNCC3)C=C2)N=C1N4C5CCC5)=C(C(C)=O)C4=O</chem> | 8  | CDK4-cyclin | CDK4     | = | 1.3   |
| PFE-PKIS 32 | <chem>CC(C1=CN=C(NC2=NC=C(N3CCNCC3)C=C2)N=C1N4C5CCC5)=C(C(C)=O)C4=O</chem> | 8  | CDK4-cyclin | CDK4     | = | 0.62  |
| PFE-PKIS 32 | <chem>CC(C1=CN=C(NC2=NC=C(N3CCNCC3)C=C2)N=C1N4C5CCC5)=C(C(C)=O)C4=O</chem> | 8  | CLK3        | CLK3     | > | 10000 |
| PFE-PKIS 32 | <chem>CC(C1=CN=C(NC2=NC=C(N3CCNCC3)C=C2)N=C1N4C5CCC5)=C(C(C)=O)C4=O</chem> | 8  | CSNK1E      | CSNK1E   | > | 10000 |
| PFE-PKIS 32 | <chem>CC(C1=CN=C(NC2=NC=C(N3CCNCC3)C=C2)N=C1N4C5CCC5)=C(C(C)=O)C4=O</chem> | 8  | DMPK2       | CDC42BPG | > | 10000 |
| PFE-PKIS 32 | <chem>CC(C1=CN=C(NC2=NC=C(N3CCNCC3)C=C2)N=C1N4C5CCC5)=C(C(C)=O)C4=O</chem> | 8  | ERK3        | MAPK6    | > | 10000 |
| PFE-PKIS 32 | <chem>CC(C1=CN=C(NC2=NC=C(N3CCNCC3)C=C2)N=C1N4C5CCC5)=C(C(C)=O)C4=O</chem> | 8  | LIMK2       | LIMK2    | > | 10000 |
| PFE-PKIS 32 | <chem>CC(C1=CN=C(NC2=NC=C(N3CCNCC3)C=C2)N=C1N4C5CCC5)=C(C(C)=O)C4=O</chem> | 8  | LZK         | MAP3K13  | > | 10000 |
| PFE-PKIS 32 | <chem>CC(C1=CN=C(NC2=NC=C(N3CCNCC3)C=C2)N=C1N4C5CCC5)=C(C(C)=O)C4=O</chem> | 8  | TTK         | TTK      | = | 9.2   |
| PFE-PKIS 34 | <chem>CN([C@H]1CN(C(CO)=O)CC[C@H]1C)C2=C3C(NC=C3)=NC=N2</chem>             | 9  | DCAMKL3     | DCLK3    | = | 240   |
| PFE-PKIS 34 | <chem>CN([C@H]1CN(C(CO)=O)CC[C@H]1C)C2=C3C(NC=C3)=NC=N2</chem>             | 9  | JAK1(JH1do  | JAK1     | = | 120   |
| PFE-PKIS 34 | <chem>CN([C@H]1CN(C(CO)=O)CC[C@H]1C)C2=C3C(NC=C3)=NC=N2</chem>             | 9  | JAK2(JH1do  | JAK2     | = | 11    |
| PFE-PKIS 34 | <chem>CN([C@H]1CN(C(CO)=O)CC[C@H]1C)C2=C3C(NC=C3)=NC=N2</chem>             | 9  | JAK3(JH1do  | JAK3     | = | 3.6   |
| PFE-PKIS 34 | <chem>CN([C@H]1CN(C(CO)=O)CC[C@H]1C)C2=C3C(NC=C3)=NC=N2</chem>             | 9  | MRCKB       | CDC42BPB | > | 10000 |
| PFE-PKIS 34 | <chem>CN([C@H]1CN(C(CO)=O)CC[C@H]1C)C2=C3C(NC=C3)=NC=N2</chem>             | 9  | NLK         | NLK      | > | 10000 |
| PFE-PKIS 34 | <chem>CN([C@H]1CN(C(CO)=O)CC[C@H]1C)C2=C3C(NC=C3)=NC=N2</chem>             | 9  | PKAC-beta   | PRKACB   | > | 10000 |
| PFE-PKIS 34 | <chem>CN([C@H]1CN(C(CO)=O)CC[C@H]1C)C2=C3C(NC=C3)=NC=N2</chem>             | 9  | PKMYT1      | PKMYT1   | > | 10000 |
| PFE-PKIS 34 | <chem>CN([C@H]1CN(C(CO)=O)CC[C@H]1C)C2=C3C(NC=C3)=NC=N2</chem>             | 9  | PRKG1       | PRKG1    | > | 10000 |
| PFE-PKIS 34 | <chem>CN([C@H]1CN(C(CO)=O)CC[C@H]1C)C2=C3C(NC=C3)=NC=N2</chem>             | 9  | RPS6KA4(Kii | RPS6KA4  | > | 10000 |
| PFE-PKIS 34 | <chem>CN([C@H]1CN(C(CO)=O)CC[C@H]1C)C2=C3C(NC=C3)=NC=N2</chem>             | 9  | TYK2(JH1do  | TYK2     | = | 110   |
| PFE-PKIS 35 | <chem>N#CC1=C(N2CCOCC2)SC(C3=NC=NN3)=C1C4=CC=C(S(=O)(C)=O)C=C4</chem>      | 16 | BRSK1       | BRSK1    | > | 10000 |

|             |                                                                  |                         |         |   |       |
|-------------|------------------------------------------------------------------|-------------------------|---------|---|-------|
| PFE-PKIS 35 | N#CC1=C(N2CCOCC2)SC(C3=NC=NN3)=C1C4=CC=C(S(=O)(C)=O)C=C4         | 16 IRAK3                | IRAK3   | > | 10000 |
| PFE-PKIS 35 | N#CC1=C(N2CCOCC2)SC(C3=NC=NN3)=C1C4=CC=C(S(=O)(C)=O)C=C4         | 16 MST3                 | STK24   | > | 10000 |
| PFE-PKIS 35 | N#CC1=C(N2CCOCC2)SC(C3=NC=NN3)=C1C4=CC=C(S(=O)(C)=O)C=C4         | 16 PIK3CA               | PIK3CA  | = | 21    |
| PFE-PKIS 35 | N#CC1=C(N2CCOCC2)SC(C3=NC=NN3)=C1C4=CC=C(S(=O)(C)=O)C=C4         | 16 PIK3CB               | PIK3CB  | = | 77    |
| PFE-PKIS 35 | N#CC1=C(N2CCOCC2)SC(C3=NC=NN3)=C1C4=CC=C(S(=O)(C)=O)C=C4         | 16 RSK3(Kin.Dc RPS6KA2) |         | > | 10000 |
| PFE-PKIS 35 | N#CC1=C(N2CCOCC2)SC(C3=NC=NN3)=C1C4=CC=C(S(=O)(C)=O)C=C4         | 16 RSK4(Kin.Dc RPS6KA6) |         | > | 10000 |
| PFE-PKIS 35 | N#CC1=C(N2CCOCC2)SC(C3=NC=NN3)=C1C4=CC=C(S(=O)(C)=O)C=C4         | 16 VPS34                | PIK3C3  | = | 110   |
| PFE-PKIS 39 | CN(N=C1)C=C1C(C=C2)=NN3C2=NN=C3[C@@H](C)C4=CC=C(N=CC=C5)C5=C4    | 13 BRSK2                | BRSK2   | > | 10000 |
| PFE-PKIS 39 | CN(N=C1)C=C1C(C=C2)=NN3C2=NN=C3[C@@H](C)C4=CC=C(N=CC=C5)C5=C4    | 13 CHEK1                | CHEK1   | > | 10000 |
| PFE-PKIS 39 | CN(N=C1)C=C1C(C=C2)=NN3C2=NN=C3[C@@H](C)C4=CC=C(N=CC=C5)C5=C4    | 13 DAPK2                | DAPK2   | > | 10000 |
| PFE-PKIS 39 | CN(N=C1)C=C1C(C=C2)=NN3C2=NN=C3[C@@H](C)C4=CC=C(N=CC=C5)C5=C4    | 13 DAPK3                | DAPK3   | > | 10000 |
| PFE-PKIS 39 | CN(N=C1)C=C1C(C=C2)=NN3C2=NN=C3[C@@H](C)C4=CC=C(N=CC=C5)C5=C4    | 13 DDR1                 | DDR1    | > | 10000 |
| PFE-PKIS 39 | CN(N=C1)C=C1C(C=C2)=NN3C2=NN=C3[C@@H](C)C4=CC=C(N=CC=C5)C5=C4    | 13 EPHA1                | EPHA1   | > | 10000 |
| PFE-PKIS 39 | CN(N=C1)C=C1C(C=C2)=NN3C2=NN=C3[C@@H](C)C4=CC=C(N=CC=C5)C5=C4    | 13 MAP3K4               | MAP3K4  | > | 10000 |
| PFE-PKIS 39 | CN(N=C1)C=C1C(C=C2)=NN3C2=NN=C3[C@@H](C)C4=CC=C(N=CC=C5)C5=C4    | 13 MET                  | MET     | = | 0.28  |
| PFE-PKIS 39 | CN(N=C1)C=C1C(C=C2)=NN3C2=NN=C3[C@@H](C)C4=CC=C(N=CC=C5)C5=C4    | 13 MYO3A                | MYO3A   | > | 10000 |
| PFE-PKIS 39 | CN(N=C1)C=C1C(C=C2)=NN3C2=NN=C3[C@@H](C)C4=CC=C(N=CC=C5)C5=C4    | 13 NEK4                 | NEK4    | > | 10000 |
| PFE-PKIS 39 | CN(N=C1)C=C1C(C=C2)=NN3C2=NN=C3[C@@H](C)C4=CC=C(N=CC=C5)C5=C4    | 13 PHKG2                | PHKG2   | > | 10000 |
| PFE-PKIS 39 | CN(N=C1)C=C1C(C=C2)=NN3C2=NN=C3[C@@H](C)C4=CC=C(N=CC=C5)C5=C4    | 13 PRKD3                | PRKD3   | > | 10000 |
| PFE-PKIS 39 | CN(N=C1)C=C1C(C=C2)=NN3C2=NN=C3[C@@H](C)C4=CC=C(N=CC=C5)C5=C4    | 13 TRPM6                | TRPM6   | > | 10000 |
| PFE-PKIS 40 | O=C1N([C@@H]2CC[C@@H](O)CC2)C3=NC(N)=NC(C)=C3C=C1C4=CC=C(OC)N=C4 | 19 MTOR                 | MTOR    | = | 4.8   |
| PFE-PKIS 40 | O=C1N([C@@H]2CC[C@@H](O)CC2)C3=NC(N)=NC(C)=C3C=C1C4=CC=C(OC)N=C4 | 19 MYLK                 | MYLK    | > | 10000 |
| PFE-PKIS 40 | O=C1N([C@@H]2CC[C@@H](O)CC2)C3=NC(N)=NC(C)=C3C=C1C4=CC=C(OC)N=C4 | 19 p38-gamma            | MAPK12  | > | 10000 |
| PFE-PKIS 40 | O=C1N([C@@H]2CC[C@@H](O)CC2)C3=NC(N)=NC(C)=C3C=C1C4=CC=C(OC)N=C4 | 19 PIK3C2B              | PIK3C2B | = | 2.7   |
| PFE-PKIS 40 | O=C1N([C@@H]2CC[C@@H](O)CC2)C3=NC(N)=NC(C)=C3C=C1C4=CC=C(OC)N=C4 | 19 PIK3C2G              | PIK3C2G | = | 0.46  |
| PFE-PKIS 40 | O=C1N([C@@H]2CC[C@@H](O)CC2)C3=NC(N)=NC(C)=C3C=C1C4=CC=C(OC)N=C4 | 19 PIK3CA               | PIK3CA  | = | 0.34  |
| PFE-PKIS 40 | O=C1N([C@@H]2CC[C@@H](O)CC2)C3=NC(N)=NC(C)=C3C=C1C4=CC=C(OC)N=C4 | 19 PIK3CB               | PIK3CB  | = | 1.7   |

|             |                                                                 |    |             |        |   |       |
|-------------|-----------------------------------------------------------------|----|-------------|--------|---|-------|
| PFE-PKIS 40 | <chem>O=C1N([C@@H]2CC[C@@H](O)CC2)C3=NC(N)=NC(C)=C3</chem>      | 19 | PIK3CD      | PIK3CD | = | 0.49  |
| PFE-PKIS 40 | <chem>C=C1C4=CC=C(OC)N=C4</chem>                                |    |             |        |   |       |
| PFE-PKIS 40 | <chem>O=C1N([C@@H]2CC[C@@H](O)CC2)C3=NC(N)=NC(C)=C3</chem>      | 19 | PIK3CG      | PIK3CG | = | 0.32  |
| PFE-PKIS 40 | <chem>C=C1C4=CC=C(OC)N=C4</chem>                                |    |             |        |   |       |
| PFE-PKIS 40 | <chem>O=C1N([C@@H]2CC[C@@H](O)CC2)C3=NC(N)=NC(C)=C3</chem>      | 19 | PIK4CB      | PI4KB  | = | 25    |
| PFE-PKIS 40 | <chem>C=C1C4=CC=C(OC)N=C4</chem>                                |    |             |        |   |       |
| PFE-PKIS 41 | <chem>O=C1N([C@@H]2CC[C@@H](O)CC2)C3=NC(N)=NC(C)=C3</chem>      | 19 | TBK1        | TBK1   | > | 10000 |
| PFE-PKIS 41 | <chem>CC1=CC(OCC2=C(F)C=C(F)C=C2)=C(Br)C(N1C3=C(C)C=CC(C</chem> | 8  | CDKL1       | CDKL1  | > | 10000 |
| PFE-PKIS 41 | <chem>(NC)=O)=C3)=O</chem>                                      |    |             |        |   |       |
| PFE-PKIS 41 | <chem>CC1=CC(OCC2=C(F)C=C(F)C=C2)=C(Br)C(N1C3=C(C)C=CC(C</chem> | 8  | JNK2        | MAPK9  | > | 10000 |
| PFE-PKIS 41 | <chem>(NC)=O)=C3)=O</chem>                                      |    |             |        |   |       |
| PFE-PKIS 41 | <chem>CC1=CC(OCC2=C(F)C=C(F)C=C2)=C(Br)C(N1C3=C(C)C=CC(C</chem> | 8  | JNK3        | MAPK10 | > | 10000 |
| PFE-PKIS 41 | <chem>(NC)=O)=C3)=O</chem>                                      |    |             |        |   |       |
| PFE-PKIS 41 | <chem>CC1=CC(OCC2=C(F)C=C(F)C=C2)=C(Br)C(N1C3=C(C)C=CC(C</chem> | 8  | MKNK2       | MKNK2  | > | 10000 |
| PFE-PKIS 41 | <chem>(NC)=O)=C3)=O</chem>                                      |    |             |        |   |       |
| PFE-PKIS 41 | <chem>CC1=CC(OCC2=C(F)C=C(F)C=C2)=C(Br)C(N1C3=C(C)C=CC(C</chem> | 8  | p38-alpha   | MAPK14 | = | 4.1   |
| PFE-PKIS 41 | <chem>(NC)=O)=C3)=O</chem>                                      |    |             |        |   |       |
| PFE-PKIS 41 | <chem>CC1=CC(OCC2=C(F)C=C(F)C=C2)=C(Br)C(N1C3=C(C)C=CC(C</chem> | 8  | p38-beta    | MAPK11 | = | 120   |
| PFE-PKIS 41 | <chem>(NC)=O)=C3)=O</chem>                                      |    |             |        |   |       |
| PFE-PKIS 41 | <chem>CC1=CC(OCC2=C(F)C=C(F)C=C2)=C(Br)C(N1C3=C(C)C=CC(C</chem> | 8  | PRKCI       | PRKCI  | > | 10000 |
| PFE-PKIS 41 | <chem>(NC)=O)=C3)=O</chem>                                      |    |             |        |   |       |
| PFE-PKIS 41 | <chem>CC1=CC(OCC2=C(F)C=C(F)C=C2)=C(Br)C(N1C3=C(C)C=CC(C</chem> | 8  | PRKG2       | PRKG2  | > | 10000 |
| PFE-PKIS 41 | <chem>(NC)=O)=C3)=O</chem>                                      |    |             |        |   |       |
| PFE-PKIS 42 | <chem>C[C@H](CN1)N=C(N(C)C)C2=C1C3=C(C=CC(C4=CN=C(C)C=C</chem>  | 1  | MYLK4       | MYLK4  | > | 10000 |
| PFE-PKIS 43 | <chem>C4)=N5)C5=CC=C3S2</chem>                                  | 2  | DRAK2       | STK17B | = | 3.8   |
| PFE-PKIS 43 | <chem>O=C(CSC1=C2C(C=C(S2)C3=CC=C(C=C3)SC)=NC=N1)O</chem>       | 2  | SRPK2       | SRPK2  | > | 10000 |
| PFE-PKIS 44 | <chem>O=C(CSC1=C2C(C=C(S2)C3=CC=C(C=C3)SC)=NC=N1)O</chem>       |    |             |        |   |       |
| PFE-PKIS 44 | <chem>CC(C1=CN=C(NC2=NN(C)C=C2)N=C1N3C4CCCC4)=C(C(C)=</chem>    | 6  | CDC2L2      | CDC2L2 | > | 10000 |
| PFE-PKIS 44 | <chem>O)C3=O</chem>                                             |    |             |        |   |       |
| PFE-PKIS 44 | <chem>CC(C1=CN=C(NC2=NN(C)C=C2)N=C1N3C4CCCC4)=C(C(C)=</chem>    | 6  | CDK4-cyclin | CDK4   | = | 23    |
| PFE-PKIS 44 | <chem>O)C3=O</chem>                                             |    |             |        |   |       |
| PFE-PKIS 44 | <chem>CC(C1=CN=C(NC2=NN(C)C=C2)N=C1N3C4CCCC4)=C(C(C)=</chem>    | 6  | CDK4-cyclin | CDK4   | = | 9.9   |
| PFE-PKIS 44 | <chem>O)C3=O</chem>                                             |    |             |        |   |       |
| PFE-PKIS 44 | <chem>CC(C1=CN=C(NC2=NN(C)C=C2)N=C1N3C4CCCC4)=C(C(C)=</chem>    | 6  | DCAMKL2     | DCLK2  | > | 10000 |
| PFE-PKIS 44 | <chem>O)C3=O</chem>                                             |    |             |        |   |       |
| PFE-PKIS 44 | <chem>CC(C1=CN=C(NC2=NN(C)C=C2)N=C1N3C4CCCC4)=C(C(C)=</chem>    | 6  | PCTK3       | CDK18  | > | 10000 |
| PFE-PKIS 44 | <chem>O)C3=O</chem>                                             |    |             |        |   |       |
| PFE-PKIS 46 | <chem>O=C(C1)NC(C1=C2)=CC=C2NC3=NC(NCC4=CC(S(=O)(C(F)(F</chem>  | 2  | PAK4        | PAK4   | > | 10000 |
| PFE-PKIS 46 | <chem>)F)=O)=CC=C4)=NC=C3C(F)(F)F</chem>                        |    |             |        |   |       |
| PFE-PKIS 46 | <chem>O=C(C1)NC(C1=C2)=CC=C2NC3=NC(NCC4=CC(S(=O)(C(F)(F</chem>  | 2  | PIM1        | PIM1   | > | 10000 |
| PFE-PKIS 46 | <chem>)F)=O)=CC=C4)=NC=C3C(F)(F)F</chem>                        |    |             |        |   |       |
| PFE-PKIS 47 | <chem>CN([C@H]1CN(C(C#N)=O)CC[C@H]1C)C2=C3C(NC=C3)=</chem>      | 1  | JAK3(JH1do  | JAK3   | = | 140   |
| PFE-PKIS 47 | <chem>NC(C)=N2</chem>                                           |    |             |        |   |       |
| PFE-PKIS 9  | <chem>O=C(O)COC1=C2C(C=C(C3=CC=C(NN=C4)C4=C3)S2)=NC=</chem>     | 5  | BRK         | PTK6   | > | 10000 |
| PFE-PKIS 9  | <chem>N1</chem>                                                 |    |             |        |   |       |
| PFE-PKIS 9  | <chem>O=C(O)COC1=C2C(C=C(C3=CC=C(NN=C4)C4=C3)S2)=NC=</chem>     | 5  | DRAK1       | STK17A | = | 250   |
| PFE-PKIS 9  | <chem>N1</chem>                                                 |    |             |        |   |       |
| PFE-PKIS 9  | <chem>O=C(O)COC1=C2C(C=C(C3=CC=C(NN=C4)C4=C3)S2)=NC=</chem>     | 5  | DRAK2       | STK17B | = | 30    |
| PFE-PKIS 9  | <chem>N1</chem>                                                 |    |             |        |   |       |
| PFE-PKIS 9  | <chem>O=C(O)COC1=C2C(C=C(C3=CC=C(NN=C4)C4=C3)S2)=NC=</chem>     | 5  | FRK         | FRK    | > | 10000 |
| PFE-PKIS 9  | <chem>N1</chem>                                                 |    |             |        |   |       |

|            |                                                                                       |   |             |         |   |       |
|------------|---------------------------------------------------------------------------------------|---|-------------|---------|---|-------|
| PFE-PKIS 9 | O=C(O)COC1=C2C(C=C(C3=CC=C(NN=C4)C4=C3)S2)=NC=N1                                      | 5 | FYN         | FYN     | > | 10000 |
| PFE-PKIS 9 | O=C(O)COC1=C2C(C=C(C3=CC=C(NN=C4)C4=C3)S2)=NC=N1                                      | 5 | LTK         | LTK     | > | 10000 |
| PFE-PKIS 9 | O=C(O)COC1=C2C(C=C(C3=CC=C(NN=C4)C4=C3)S2)=NC=N1                                      | 5 | NEK3        | NEK3    | = | 210   |
| PFE-PKIS 9 | O=C(O)COC1=C2C(C=C(C3=CC=C(NN=C4)C4=C3)S2)=NC=N1                                      | 5 | YSK4        | MAP3K19 | = | 20    |
| SB-210486  | Fc1ccc(cc1)-c1ncn(CCCNCc2ccccc2)c1-c1ccncc1                                           | 3 | CSNK1A1     | CSNK1A1 | = | 210   |
| SB-210486  | Fc1ccc(cc1)-c1ncn(CCCNCc2ccccc2)c1-c1ccncc1                                           | 3 | CSNK1D      | CSNK1D  | = | 47    |
| SB-210486  | Fc1ccc(cc1)-c1ncn(CCCNCc2ccccc2)c1-c1ccncc1                                           | 3 | CSNK1E      | CSNK1E  | = | 130   |
| SKF-97510  | Cc1ccccc1-n1cnc2c(N)ncnc12                                                            | 8 | ABL1-nonph  | ABL1    | > | 10000 |
| SKF-97510  | Cc1ccccc1-n1cnc2c(N)ncnc12                                                            | 8 | DAPK1       | DAPK1   | > | 10000 |
| SKF-97510  | Cc1ccccc1-n1cnc2c(N)ncnc12                                                            | 8 | LCK         | LCK     | > | 10000 |
| SKF-97510  | Cc1ccccc1-n1cnc2c(N)ncnc12                                                            | 8 | RSK1(Kin.Dc | RPS6KA1 | > | 10000 |
| SKF-97510  | Cc1ccccc1-n1cnc2c(N)ncnc12                                                            | 8 | SLK         | SLK     | > | 10000 |
| SKF-97510  | Cc1ccccc1-n1cnc2c(N)ncnc12                                                            | 8 | SYK         | SYK     | > | 10000 |
| SKF-97510  | Cc1ccccc1-n1cnc2c(N)ncnc12                                                            | 8 | TLK1        | TLK1    | > | 10000 |
| SKF-97560  | Nc1ncnc2n(cnc12)-c1cccc(F)c1                                                          | 6 | FGFR4       | FGFR4   | > | 10000 |
| SKF-97560  | Nc1ncnc2n(cnc12)-c1cccc(F)c1                                                          | 6 | RIPK2       | RIPK2   | > | 10000 |
| SKF-97560  | Nc1ncnc2n(cnc12)-c1cccc(F)c1                                                          | 6 | TNNI3K      | TNNI3K  | > | 10000 |
| TPKI-100   | COC(=O)C1=C(C2=CC=CC=C2)C2=CC(Br)=CC=C2C(=O)N1C<br>C1=CC=C(C=C1)S(C)(=O)=O            | 3 | JNK1        | MAPK8   | = | 480   |
| TPKI-100   | COC(=O)C1=C(C2=CC=CC=C2)C2=CC(Br)=CC=C2C(=O)N1C<br>C1=CC=C(C=C1)S(C)(=O)=O            | 3 | JNK2        | MAPK9   | = | 350   |
| TPKI-100   | COC(=O)C1=C(C2=CC=CC=C2)C2=CC(Br)=CC=C2C(=O)N1C<br>C1=CC=C(C=C1)S(C)(=O)=O            | 3 | JNK3        | MAPK10  | = | 73    |
| TPKI-101   | CCC(=O)C1=C(C2=CC=CC=C2)C2=CC(Cl)=CC=C2C(=O)N1CC<br>1=CC=C(C=C1)C(O)=O                | 3 | JNK1        | MAPK8   | = | 66    |
| TPKI-101   | CCC(=O)C1=C(C2=CC=CC=C2)C2=CC(Cl)=CC=C2C(=O)N1CC<br>1=CC=C(C=C1)C(O)=O                | 3 | JNK2        | MAPK9   | = | 77    |
| TPKI-101   | CCC(=O)C1=C(C2=CC=CC=C2)C2=CC(Cl)=CC=C2C(=O)N1CC<br>1=CC=C(C=C1)C(O)=O                | 3 | JNK3        | MAPK10  | = | 12    |
| TPKI-102   | CCC(=O)C1=C(C2=CC=CC=C2)C2=CC(Cl)=CC=C2C(=O)N1CC<br>1=NN(C)C(C=C1)C(O)=O              | 3 | JNK1        | MAPK8   | = | 20    |
| TPKI-102   | CCC(=O)C1=C(C2=CC=CC=C2)C2=CC(Cl)=CC=C2C(=O)N1CC<br>1=NN(C)C(C=C1)C(O)=O              | 3 | JNK2        | MAPK9   | = | 10    |
| TPKI-102   | CCC(=O)C1=C(C2=CC=CC=C2)C2=CC(Cl)=CC=C2C(=O)N1CC<br>1=NN(C)C(C=C1)C(O)=O              | 3 | JNK3        | MAPK10  | = | 3.8   |
| TPKI-103   | CCC(=O)C1=C(C2=CC=CC=C2)C2=CC(Cl)=CC=C2C(=O)N1CC<br>1=NN(CC(F)F)C(C=C1)S(C)(=O)=O     | 3 | JNK1        | MAPK8   | = | 37    |
| TPKI-103   | CCC(=O)C1=C(C2=CC=CC=C2)C2=CC(Cl)=CC=C2C(=O)N1CC<br>1=NN(CC(F)F)C(C=C1)S(C)(=O)=O     | 3 | JNK2        | MAPK9   | = | 33    |
| TPKI-103   | CCC(=O)C1=C(C2=CC=CC=C2)C2=CC(Cl)=CC=C2C(=O)N1CC<br>1=NN(CC(F)F)C(C=C1)S(C)(=O)=O     | 3 | JNK3        | MAPK10  | = | 9.2   |
| TPKI-104   | CCC(=O)C1=C(C2=CC=CC=C2)C2=CC(Cl)=CC=C2C(=O)N1CC<br>1=NN(CCC(C)C(O)C(C=C1)S(C)(=O)=O) | 3 | JNK1        | MAPK8   | = | 19    |
| TPKI-104   | CCC(=O)C1=C(C2=CC=CC=C2)C2=CC(Cl)=CC=C2C(=O)N1CC<br>1=NN(CCC(C)C(O)C(C=C1)S(C)(=O)=O) | 3 | JNK2        | MAPK9   | = | 15    |
| TPKI-104   | CCC(=O)C1=C(C2=CC=CC=C2)C2=CC(Cl)=CC=C2C(=O)N1CC<br>1=NN(CCC(C)C(O)C(C=C1)S(C)(=O)=O) | 3 | JNK3        | MAPK10  | = | 4.6   |
| TPKI-105   | CCC(=O)C1=C(C2=CC=CC=C2)C2=CC(Cl)=CC=C2C(=O)N1CC<br>1=NN(CC(N)=O)C(C=C1)S(C)(=O)=O    | 6 | JNK1        | MAPK8   | = | 160   |
| TPKI-105   | CCC(=O)C1=C(C2=CC=CC=C2)C2=CC(Cl)=CC=C2C(=O)N1CC<br>1=NN(CC(N)=O)C(C=C1)S(C)(=O)=O    | 6 | JNK2        | MAPK9   | = | 120   |

|          |                                                                               |    |                     |         |   |       |
|----------|-------------------------------------------------------------------------------|----|---------------------|---------|---|-------|
| TPKI-105 | CCC(=O)C1=C(C2=CC=CC=C2)C2=CC(CI)=CC=C2C(=O)N1CC1=NN(CC(N)=O)C(=C1)S(C)(=O)=O | 6  | JNK3                | MAPK10  | = | 60    |
| TPKI-105 | CCC(=O)C1=C(C2=CC=CC=C2)C2=CC(CI)=CC=C2C(=O)N1CC1=NN(CC(N)=O)C(=C1)S(C)(=O)=O | 6  | PRKCH               | PRKCH   | > | 10000 |
| TPKI-106 | CCC1=NC(=C(S1)C1=CC=NC=C1)C1=CC(C)=CC=C1                                      | 4  | FAK                 | PTK2    | > | 10000 |
| TPKI-106 | CCC1=NC(=C(S1)C1=CC=NC=C1)C1=CC(C)=CC=C1                                      | 4  | JNK3                | MAPK10  | = | 81    |
| TPKI-106 | CCC1=NC(=C(S1)C1=CC=NC=C1)C1=CC(C)=CC=C1                                      | 4  | NLK                 | NLK     | = | 180   |
| TPKI-106 | CCC1=NC(=C(S1)C1=CC=NC=C1)C1=CC(C)=CC=C1                                      | 4  | RSK1(Kin.Dc RPS6KA1 |         | = | 250   |
| TPKI-106 | CCC1=NC(=C(S1)C1=CC=NC=C1)C1=CC(C)=CC=C1                                      | 4  | RSK4(Kin.Dc RPS6KA6 |         | = | 120   |
| TPKI-107 | CCC1=NC(=C(S1)C1=CC(NC(=O)C2=CC=CC=C2)=NC=C1)C1=CC(C)=CC=C1                   | 6  | CSNK1A1             | CSNK1A1 | = | 1400  |
| TPKI-107 | CCC1=NC(=C(S1)C1=CC(NC(=O)C2=CC=CC=C2)=NC=C1)C1=CC(C)=CC=C1                   | 6  | CSNK1D              | CSNK1D  | = | 690   |
| TPKI-107 | CCC1=NC(=C(S1)C1=CC(NC(=O)C2=CC=CC=C2)=NC=C1)C1=CC(C)=CC=C1                   | 6  | CSNK1E              | CSNK1E  | = | 880   |
| TPKI-107 | CCC1=NC(=C(S1)C1=CC(NC(=O)C2=CC=CC=C2)=NC=C1)C1=CC(C)=CC=C1                   | 6  | EPHB6               | EPHB6   | = | 7600  |
| TPKI-107 | CCC1=NC(=C(S1)C1=CC(NC(=O)C2=CC=CC=C2)=NC=C1)C1=CC(C)=CC=C1                   | 6  | IKK-epsilon         | IKBKE   | > | 10000 |
| TPKI-107 | CCC1=NC(=C(S1)C1=CC(NC(=O)C2=CC=CC=C2)=NC=C1)C1=CC(C)=CC=C1                   | 6  | JNK3                | MAPK10  | = | 190   |
| TPKI-107 | CCC1=NC(=C(S1)C1=CC(NC(=O)C2=CC=CC=C2)=NC=C1)C1=CC(C)=CC=C1                   | 6  | LATS2               | LATS2   | > | 10000 |
| TPKI-107 | CCC1=NC(=C(S1)C1=CC(NC(=O)C2=CC=CC=C2)=NC=C1)C1=CC(C)=CC=C1                   | 6  | p38-alpha           | MAPK14  | = | 100   |
| TPKI-107 | CCC1=NC(=C(S1)C1=CC(NC(=O)C2=CC=CC=C2)=NC=C1)C1=CC(C)=CC=C1                   | 6  | PIP5K2C             | PIP4K2C | = | 4100  |
| TPKI-108 | CCC1=NC(=C(S1)C1=CC(NCCC2=CC=CC=C2)=NC=C1)C1=CC(C)=CC=C1                      | 1  | p38-alpha           | MAPK14  | = | 150   |
| TPKI-109 | CC1=CC=CC(=C1)C1=C(SC(=N1)C1=CC=C(C=C1)S(C)(=O)=O)C1=CC=NC=C1                 | 1  | p38-alpha           | MAPK14  | = | 540   |
| TPKI-110 | CC1=CC=CC(=C1)C1=C(SC(=N1)C1=CC=C(C=C1)S(C)(=O)=O)C1=CC(NCCC2=CC=CC=C2)=NC=C1 | 9  | ABL1-nonpf          | ABL1    | = | 330   |
| TPKI-110 | CC1=CC=CC(=C1)C1=C(SC(=N1)C1=CC=C(C=C1)S(C)(=O)=O)C1=CC(NCCC2=CC=CC=C2)=NC=C1 | 9  | BRAF                | BRAF    | = | 81    |
| TPKI-110 | CC1=CC=CC(=C1)C1=C(SC(=N1)C1=CC=C(C=C1)S(C)(=O)=O)C1=CC(NCCC2=CC=CC=C2)=NC=C1 | 9  | DDR1                | DDR1    | = | 230   |
| TPKI-110 | CC1=CC=CC(=C1)C1=C(SC(=N1)C1=CC=C(C=C1)S(C)(=O)=O)C1=CC(NCCC2=CC=CC=C2)=NC=C1 | 9  | KIT                 | KIT     | = | 120   |
| TPKI-110 | CC1=CC=CC(=C1)C1=C(SC(=N1)C1=CC=C(C=C1)S(C)(=O)=O)C1=CC(NCCC2=CC=CC=C2)=NC=C1 | 9  | p38-alpha           | MAPK14  | = | 1900  |
| TPKI-110 | CC1=CC=CC(=C1)C1=C(SC(=N1)C1=CC=C(C=C1)S(C)(=O)=O)C1=CC(NCCC2=CC=CC=C2)=NC=C1 | 9  | PDGFRA              | PDGFRA  | = | 550   |
| TPKI-110 | CC1=CC=CC(=C1)C1=C(SC(=N1)C1=CC=C(C=C1)S(C)(=O)=O)C1=CC(NCCC2=CC=CC=C2)=NC=C1 | 9  | PDGFRB              | PDGFRB  | = | 68    |
| TPKI-110 | CC1=CC=CC(=C1)C1=C(SC(=N1)C1=CC=C(C=C1)S(C)(=O)=O)C1=CC(NCCC2=CC=CC=C2)=NC=C1 | 9  | RAF1                | RAF1    | = | 150   |
| TPKI-110 | CC1=CC=CC(=C1)C1=C(SC(=N1)C1=CC=C(C=C1)S(C)(=O)=O)C1=CC(NCCC2=CC=CC=C2)=NC=C1 | 9  | VPS34               | PIK3C3  | = | 8400  |
| TPKI-111 | CC(=O)NC1=NC2=CN=C(NC3=C(C)C=CC(NC(=O)C4=CC=CC(CCC#N)=C4)=C3)N=C2S1           | 11 | ABL1-nonpf          | ABL1    | > | 10000 |
| TPKI-111 | CC(=O)NC1=NC2=CN=C(NC3=C(C)C=CC(NC(=O)C4=CC=CC(CCC#N)=C4)=C3)N=C2S1           | 11 | BRAF                | BRAF    | > | 10000 |
| TPKI-111 | CC(=O)NC1=NC2=CN=C(NC3=C(C)C=CC(NC(=O)C4=CC=CC(CCC#N)=C4)=C3)N=C2S1           | 11 | CSF1R               | CSF1R   | > | 10000 |

|          |                                                                        |    |         |         |   |       |
|----------|------------------------------------------------------------------------|----|---------|---------|---|-------|
| TPKI-111 | CC(=O)NC1=NC2=CN=C(NC3=C(C)C=CC(NC(=O)C4=CC=CC(CCC#N)=C4)=C3)N=C2S1    | 11 | DDR1    | DDR1    | > | 10000 |
| TPKI-111 | CC(=O)NC1=NC2=CN=C(NC3=C(C)C=CC(NC(=O)C4=CC=CC(CCC#N)=C4)=C3)N=C2S1    | 11 | DDR2    | DDR2    | > | 10000 |
| TPKI-111 | CC(=O)NC1=NC2=CN=C(NC3=C(C)C=CC(NC(=O)C4=CC=CC(CCC#N)=C4)=C3)N=C2S1    | 11 | FRK     | FRK     | > | 10000 |
| TPKI-111 | CC(=O)NC1=NC2=CN=C(NC3=C(C)C=CC(NC(=O)C4=CC=CC(CCC#N)=C4)=C3)N=C2S1    | 11 | KIT     | KIT     | > | 10000 |
| TPKI-111 | CC(=O)NC1=NC2=CN=C(NC3=C(C)C=CC(NC(=O)C4=CC=CC(CCC#N)=C4)=C3)N=C2S1    | 11 | PDGFRA  | PDGFRA  | > | 10000 |
| TPKI-111 | CC(=O)NC1=NC2=CN=C(NC3=C(C)C=CC(NC(=O)C4=CC=CC(CCC#N)=C4)=C3)N=C2S1    | 11 | PDGFRB  | PDGFRB  | > | 10000 |
| TPKI-111 | CC(=O)NC1=NC2=CN=C(NC3=C(C)C=CC(NC(=O)C4=CC=CC(CCC#N)=C4)=C3)N=C2S1    | 11 | RAF1    | RAF1    | > | 10000 |
| TPKI-16  | Cn1c2ncn(OC[C@H](O)CO)c(=O)c2c(Nc3ccc(l)cc3F)c(F)c1=O                  | 2  | HIPK4   | HIPK4   | > | 10000 |
| TPKI-16  | Cn1c2ncn(OC[C@H](O)CO)c(=O)c2c(Nc3ccc(l)cc3F)c(F)c1=O                  | 2  | MEK1    | MAP2K1  | = | 34    |
| TPKI-16  | Cn1c2ncn(OC[C@H](O)CO)c(=O)c2c(Nc3ccc(l)cc3F)c(F)c1=O                  | 2  | MEK2    | MAP2K2  | = | 200   |
| TPKI-24  | COc1cc(ccc1Nc2ncc3N(C)C(=O)C(F)(F)CN(C4CCCC4)c3n2)C(=O)NC5CCN(C)CC5    | 7  | DAPK3   | DAPK3   | = | 82    |
| TPKI-24  | COc1cc(ccc1Nc2ncc3N(C)C(=O)C(F)(F)CN(C4CCCC4)c3n2)C(=O)NC5CCN(C)CC5    | 7  | FAK     | PTK2    | = | 160   |
| TPKI-24  | COc1cc(ccc1Nc2ncc3N(C)C(=O)C(F)(F)CN(C4CCCC4)c3n2)C(=O)NC5CCN(C)CC5    | 7  | MINK    | MINK1   | = | 4000  |
| TPKI-24  | COc1cc(ccc1Nc2ncc3N(C)C(=O)C(F)(F)CN(C4CCCC4)c3n2)C(=O)NC5CCN(C)CC5    | 7  | MYLK    | MYLK    | = | 79    |
| TPKI-24  | COc1cc(ccc1Nc2ncc3N(C)C(=O)C(F)(F)CN(C4CCCC4)c3n2)C(=O)NC5CCN(C)CC5    | 7  | PIK3C2B | PIK3C2B | > | 10000 |
| TPKI-24  | COc1cc(ccc1Nc2ncc3N(C)C(=O)C(F)(F)CN(C4CCCC4)c3n2)C(=O)NC5CCN(C)CC5    | 7  | PIK3CA  | PIK3CA  | > | 10000 |
| TPKI-24  | COc1cc(ccc1Nc2ncc3N(C)C(=O)C(F)(F)CN(C4CCCC4)c3n2)C(=O)NC5CCN(C)CC5    | 7  | PLK1    | PLK1    | = | 0.058 |
| TPKI-24  | COc1cc(ccc1Nc2ncc3N(C)C(=O)C(F)(F)CN(C4CCCC4)c3n2)C(=O)NC5CCN(C)CC5    | 7  | PLK2    | PLK2    | = | 2.2   |
| TPKI-24  | COc1cc(ccc1Nc2ncc3N(C)C(=O)C(F)(F)CN(C4CCCC4)c3n2)C(=O)NC5CCN(C)CC5    | 7  | PLK3    | PLK3    | = | 1.7   |
| TPKI-25  | CC[C@@]1(F)CN(C2CCCC2)c3nc(Nc4ccc(cc4OC)C(=O)NC5CCN(C)CC5)ncc3N(C)C1=O | 2  | MYLK    | MYLK    | = | 360   |
| TPKI-25  | CC[C@@]1(F)CN(C2CCCC2)c3nc(Nc4ccc(cc4OC)C(=O)NC5CCN(C)CC5)ncc3N(C)C1=O | 2  | PLK1    | PLK1    | = | 0.77  |
| TPKI-25  | CC[C@@]1(F)CN(C2CCCC2)c3nc(Nc4ccc(cc4OC)C(=O)NC5CCN(C)CC5)ncc3N(C)C1=O | 2  | PLK2    | PLK2    | = | 76    |
| TPKI-25  | CC[C@@]1(F)CN(C2CCCC2)c3nc(Nc4ccc(cc4OC)C(=O)NC5CCN(C)CC5)ncc3N(C)C1=O | 2  | PLK3    | PLK3    | = | 180   |
| TPKI-25  | CC[C@]1(F)CN(C2CCCC2)c3nc(Nc4ccc(cc4OC)C(=O)NC5CCN(C)CC5)ncc3N(C)C1=O  | 2  | VPS34   | PIK3C3  | > | 10000 |
| TPKI-26  | CC[C@]1(F)CN(C2CCCC2)c3nc(Nc4ccc(cc4OC)C(=O)NC5CCN(C)CC5)ncc3N(C)C1=O  | 3  | PLK1    | PLK1    | = | 0.23  |
| TPKI-26  | CC[C@]1(F)CN(C2CCCC2)c3nc(Nc4ccc(cc4OC)C(=O)NC5CCN(C)CC5)ncc3N(C)C1=O  | 3  | PLK2    | PLK2    | = | 5.9   |
| TPKI-26  | CC[C@]1(F)CN(C2CCCC2)c3nc(Nc4ccc(cc4OC)C(=O)NC5CCN(C)CC5)ncc3N(C)C1=O  | 3  | PLK3    | PLK3    | = | 4.8   |



|         |                                                                                      |    |            |         |   |       |
|---------|--------------------------------------------------------------------------------------|----|------------|---------|---|-------|
| TPKI-27 | <chem>COc1cc(ccc1Nc2ncc3N(C)C(=O)[C@@H](CC=C)CN(C4CCC4)c3n2)C(=O)NC5CCN(C)CC5</chem> | 12 | EGFR       | EGFR    | = | 260   |
| TPKI-27 | <chem>COc1cc(ccc1Nc2ncc3N(C)C(=O)[C@@H](CC=C)CN(C4CCC4)c3n2)C(=O)NC5CCN(C)CC5</chem> | 12 | EPHA2      | EPHA2   | > | 10000 |
| TPKI-27 | <chem>COc1cc(ccc1Nc2ncc3N(C)C(=O)[C@@H](CC=C)CN(C4CCC4)c3n2)C(=O)NC5CCN(C)CC5</chem> | 12 | MEK3       | MAP2K3  | > | 10000 |
| TPKI-27 | <chem>COc1cc(ccc1Nc2ncc3N(C)C(=O)[C@@H](CC=C)CN(C4CCC4)c3n2)C(=O)NC5CCN(C)CC5</chem> | 12 | PLK1       | PLK1    | = | 0.33  |
| TPKI-27 | <chem>COc1cc(ccc1Nc2ncc3N(C)C(=O)[C@@H](CC=C)CN(C4CCC4)c3n2)C(=O)NC5CCN(C)CC5</chem> | 12 | PLK2       | PLK2    | = | 64    |
| TPKI-27 | <chem>COc1cc(ccc1Nc2ncc3N(C)C(=O)[C@@H](CC=C)CN(C4CCC4)c3n2)C(=O)NC5CCN(C)CC5</chem> | 12 | PLK3       | PLK3    | = | 22    |
| TPKI-27 | <chem>COc1cc(ccc1Nc2ncc3N(C)C(=O)[C@@H](CC=C)CN(C4CCC4)c3n2)C(=O)NC5CCN(C)CC5</chem> | 12 | VPS34      | PIK3C3  | > | 10000 |
| TPKI-27 | <chem>COc1cc(ccc1Nc2ncc3N(C)C(=O)[C@@H](CC=C)CN(C4CCC4)c3n2)C(=O)NC5CCN(C)CC5</chem> | 12 | WEE2       | WEE2    | = | 480   |
| TPKI-28 | <chem>COc1cc(cc(F)c1Nc2ncc3N(C)C(=O)C(F)(F)CN(C4CCCC4)c3n2)C(=O)NC5CCN(C)CC5</chem>  | 3  | PLK1       | PLK1    | = | 0.3   |
| TPKI-28 | <chem>COc1cc(cc(F)c1Nc2ncc3N(C)C(=O)C(F)(F)CN(C4CCCC4)c3n2)C(=O)NC5CCN(C)CC5</chem>  | 3  | PLK2       | PLK2    | = | 79    |
| TPKI-28 | <chem>COc1cc(cc(F)c1Nc2ncc3N(C)C(=O)C(F)(F)CN(C4CCCC4)c3n2)C(=O)NC5CCN(C)CC5</chem>  | 3  | PLK3       | PLK3    | = | 22    |
| TPKI-32 | <chem>NC(=O)c1nnc2ccccc2c1N</chem>                                                   | 2  | ADCK3      | CABC1   | > | 10000 |
| TPKI-32 | <chem>NC(=O)c1nnc2ccccc2c1N</chem>                                                   | 2  | BMX        | BMX     | > | 10000 |
| TPKI-32 | <chem>NC(=O)c1nnc2ccccc2c1N</chem>                                                   | 2  | FGFR3      | FGFR3   | > | 10000 |
| TPKI-32 | <chem>NC(=O)c1nnc2ccccc2c1N</chem>                                                   | 2  | MLK1       | MAP3K9  | > | 10000 |
| TPKI-32 | <chem>NC(=O)c1nnc2ccccc2c1N</chem>                                                   | 2  | NEK10      | NEK10   | = | 430   |
| TPKI-32 | <chem>NC(=O)c1nnc2ccccc2c1N</chem>                                                   | 2  | TIE2       | TEK     | > | 10000 |
| TPKI-32 | <chem>NC(=O)c1nnc2ccccc2c1N</chem>                                                   | 2  | YSK4       | MAP3K19 | = | 300   |
| TPKI-38 | <chem>O=C(NC1=CC=CC=C1)NC1=CC=C(OC2=NN3C=CN=C3C=C2)C=C1</chem>                       | 8  | CTK        | MATK    | > | 10000 |
| TPKI-38 | <chem>O=C(NC1=CC=CC=C1)NC1=CC=C(OC2=NN3C=CN=C3C=C2)C=C1</chem>                       | 8  | DDR1       | DDR1    | = | 9.3   |
| TPKI-38 | <chem>O=C(NC1=CC=CC=C1)NC1=CC=C(OC2=NN3C=CN=C3C=C2)C=C1</chem>                       | 8  | DDR2       | DDR2    | = | 3     |
| TPKI-38 | <chem>O=C(NC1=CC=CC=C1)NC1=CC=C(OC2=NN3C=CN=C3C=C2)C=C1</chem>                       | 8  | ERN1       | ERN1    | > | 10000 |
| TPKI-38 | <chem>O=C(NC1=CC=CC=C1)NC1=CC=C(OC2=NN3C=CN=C3C=C2)C=C1</chem>                       | 8  | KIT        | KIT     | = | 99    |
| TPKI-38 | <chem>O=C(NC1=CC=CC=C1)NC1=CC=C(OC2=NN3C=CN=C3C=C2)C=C1</chem>                       | 8  | PDGFRA     | PDGFRA  | = | 71    |
| TPKI-38 | <chem>O=C(NC1=CC=CC=C1)NC1=CC=C(OC2=NN3C=CN=C3C=C2)C=C1</chem>                       | 8  | PDGFRB     | PDGFRB  | = | 62    |
| TPKI-38 | <chem>O=C(NC1=CC=CC=C1)NC1=CC=C(OC2=NN3C=CN=C3C=C2)C=C1</chem>                       | 8  | RIPK2      | RIPK2   | > | 10000 |
| TPKI-38 | <chem>O=C(NC1=CC=CC=C1)NC1=CC=CC(OC2=NN3C=CN=C3C=C2)=C1</chem>                       | 8  | TNNI3K     | TNNI3K  | > | 10000 |
| TPKI-39 | <chem>O=C(NC1=CC=CC=C1)NC1=CC=CC(OC2=NN3C=CN=C3C=C2)=C1</chem>                       | 10 | ABL1-nonph | ABL1    | = | 140   |
| TPKI-39 | <chem>O=C(NC1=CC=CC=C1)NC1=CC=CC(OC2=NN3C=CN=C3C=C2)=C1</chem>                       | 10 | CIT        | CIT     | = | 1.1   |
| TPKI-39 | <chem>O=C(NC1=CC=CC=C1)NC1=CC=CC(OC2=NN3C=CN=C3C=C2)=C1</chem>                       | 10 | CSF1R      | CSF1R   | = | 27    |
| TPKI-39 | <chem>O=C(NC1=CC=CC=C1)NC1=CC=CC(OC2=NN3C=CN=C3C=C2)=C1</chem>                       | 10 | DDR1       | DDR1    | = | 24    |

|         |                                                            |    |             |         |   |       |
|---------|------------------------------------------------------------|----|-------------|---------|---|-------|
| TPKI-39 | O=C(NC1=CC=CC=C1)NC1=CC=CC(OC2=NN3C=CN=C3C=C2)=C1          | 10 | FLT1        | FLT1    | = | 91    |
| TPKI-39 | O=C(NC1=CC=CC=C1)NC1=CC=CC(OC2=NN3C=CN=C3C=C2)=C1          | 10 | KIT         | KIT     | = | 0.94  |
| TPKI-39 | O=C(NC1=CC=CC=C1)NC1=CC=CC(OC2=NN3C=CN=C3C=C2)=C1          | 10 | PDGFRA      | PDGFRA  | = | 3.6   |
| TPKI-39 | O=C(NC1=CC=CC=C1)NC1=CC=CC(OC2=NN3C=CN=C3C=C2)=C1          | 10 | PDGFRB      | PDGFRB  | = | 1     |
| TPKI-39 | O=C(NC1=CC=CC=C1)NC1=CC=CC(OC2=NN3C=CN=C3C=C2)=C1          | 10 | TIE2        | TEK     | > | 10000 |
| TPKI-39 | O=C(NC1=CC=CC=C1)NC1=CC=CC(OC2=NN3C=CN=C3C=C2)=C1          | 10 | YSK4        | MAP3K19 | = | 270   |
| TPKI-48 | CCC1=CC=C(C=C1)C1=CC2=C(C=C1)N(C)S(=O)(=O)C1=CN=C21        | 4  | CDK4-cyclin | CDK4    | > | 10000 |
| TPKI-48 | CCC1=CC=C(C=C1)C1=CC2=C(C=C1)N(C)S(=O)(=O)C1=CN=C21        | 4  | MEK2        | MAP2K2  | > | 10000 |
| TPKI-48 | CCC1=CC=C(C=C1)C1=CC2=C(C=C1)N(C)S(=O)(=O)C1=CN=C21        | 4  | PIKFYVE     | PIKFYVE | > | 10000 |
| TPKI-49 | CN1C2=C(C=C(C=C2)C2=CC=C(C=C2)C(N)=O)C2=C(C=NN2)S1(=O)=O   | 2  | CAMKK1      | CAMKK1  | > | 10000 |
| TPKI-49 | CN1C2=C(C=C(C=C2)C2=CC=C(C=C2)C(N)=O)C2=C(C=NN2)S1(=O)=O   | 2  | PIP5K1C     | PIP5K1C | = | 6400  |
| TPKI-49 | CN1C2=C(C=C(C=C2)C2=CC=C(C=C2)C(N)=O)C2=C(C=NN2)S1(=O)=O   | 2  | PRKD2       | PRKD2   | > | 10000 |
| TPKI-49 | CN1C2=C(C=C(C=C2)C2=CC=C(C=C2)C(N)=O)C2=C(C=NN2)S1(=O)=O   | 2  | TYK2(JH2do  | TYK2    | = | 930   |
| TPKI-50 | CN1C2=C(C=C(C=C2)C2=CC=C(C=C2)C(O)NCCO)C2=C(C=NN2)S1(=O)=O | 2  | CLK2        | CLK2    | = | 700   |
| TPKI-50 | CN1C2=C(C=C(C=C2)C2=CC=C(C=C2)C(O)NCCO)C2=C(C=NN2)S1(=O)=O | 2  | JAK3(JH1do  | JAK3    | = | 6800  |
| TPKI-50 | CN1C2=C(C=C(C=C2)C2=CC=C(C=C2)C(O)NCCO)C2=C(C=NN2)S1(=O)=O | 2  | MYLK        | MYLK    | = | 480   |
| TPKI-50 | CN1C2=C(C=C(C=C2)C2=CC=C(C=C2)C(O)NCCO)C2=C(C=NN2)S1(=O)=O | 2  | TYK2(JH2do  | TYK2    | = | 130   |
| TPKI-52 | CCC1=CC=C(C=C1)C1=CC=C2N(C)S(=O)(=O)C3=CN(C)N=C3C2=C1      | 1  | MYO3A       | MYO3A   | > | 10000 |
| TPKI-53 | CN1N=CC2=C1C1=C(C=CC(CNC3=CC=C(F)C=C3)=C1)N(C)S2(=O)=O     | 1  | SGK2        | SGK2    | > | 10000 |
| TPKI-54 | CN1N=CC2=C1C1=C(C=CC(CNC3=CC=C(F)C=C3)=C1)N(C)S2(=O)=O     | 1  | RSK4(Kin.Dc | RPS6KA6 | > | 10000 |
| TPKI-55 | CC(C)(C)C1=CC=C(C=C1)C(=O)NC1=CN2C=C(CI)C=CC2=N1           | 7  | ASK1        | MAP3K5  | = | 1500  |
| TPKI-55 | CC(C)(C)C1=CC=C(C=C1)C(=O)NC1=CN2C=C(CI)C=CC2=N1           | 7  | CAMKK1      | CAMKK1  | > | 10000 |
| TPKI-55 | CC(C)(C)C1=CC=C(C=C1)C(=O)NC1=CN2C=C(CI)C=CC2=N1           | 7  | FYN         | FYN     | > | 10000 |
| TPKI-55 | CC(C)(C)C1=CC=C(C=C1)C(=O)NC1=CN2C=C(CI)C=CC2=N1           | 7  | IKK-beta    | IKBKB   | > | 10000 |
| TPKI-55 | CC(C)(C)C1=CC=C(C=C1)C(=O)NC1=CN2C=C(CI)C=CC2=N1           | 7  | NDR1        | STK38   | > | 10000 |
| TPKI-55 | CC(C)(C)C1=CC=C(C=C1)C(=O)NC1=CN2C=C(CI)C=CC2=N1           | 7  | PRKCI       | PRKCI   | > | 10000 |
| TPKI-55 | CC(C)(C)C1=CC=C(C=C1)C(=O)NC1=CN2C=C(CI)C=CC2=N1           | 7  | PYK2        | PTK2B   | > | 10000 |
| TPKI-56 | CNCC1=CN2C=C(NC(=O)C3=CC=C(C=C3)C(C)(C)N=C2C=C1            | 4  | CLK1        | CLK1    | = | 7500  |
| TPKI-56 | CNCC1=CN2C=C(NC(=O)C3=CC=C(C=C3)C(C)(C)N=C2C=C1            | 4  | CSNK1G3     | CSNK1G3 | > | 10000 |
| TPKI-56 | CNCC1=CN2C=C(NC(=O)C3=CC=C(C=C3)C(C)(C)N=C2C=C1            | 4  | MAP3K15     | MAP3K15 | = | 3800  |
| TPKI-56 | CNCC1=CN2C=C(NC(=O)C3=CC=C(C=C3)C(C)(C)N=C2C=C1            | 4  | p38-alpha   | MAPK14  | > | 10000 |

|         |                                                           |    |             |         |   |       |
|---------|-----------------------------------------------------------|----|-------------|---------|---|-------|
| TPKI-56 | CNCC1=CN2C=C(NC(=O)C3=CC=C(C=C3)C(C)(C)C)N=C2C=C1         | 4  | PIK3C2B     | PIK3C2B | > | 10000 |
| TPKI-56 | CNCC1=CN2C=C(NC(=O)C3=CC=C(C=C3)C(C)(C)C)N=C2C=C1         | 4  | PIK3CA      | PIK3CA  | > | 10000 |
| TPKI-56 | CNCC1=CN2C=C(NC(=O)C3=CC=C(C=C3)C(C)(C)C)N=C2C=C1         | 4  | RIOK2       | RIOK2   | > | 10000 |
| TPKI-56 | CNCC1=CN2C=C(NC(=O)C3=CC=C(C=C3)C(C)(C)C)N=C2C=C1         | 4  | TAOK1       | TAOK1   | > | 10000 |
| TPKI-56 | CNCC1=CN2C=C(NC(=O)C3=CC=C(C=C3)C(C)(C)C)N=C2C=C1         | 4  | TAOK3       | TAOK3   | > | 10000 |
| TPKI-57 | CC(C)(C)C1=CC=C(C=C1)C(=O)NC1=CN2C=C(C=CC2=N1)C1=CC=CC=C1 | 4  | KIT         | KIT     | > | 10000 |
| TPKI-57 | CC(C)(C)C1=CC=C(C=C1)C(=O)NC1=CN2C=C(C=CC2=N1)C1=CC=CC=C1 | 4  | PDGFRB      | PDGFRB  | = | 3700  |
| TPKI-57 | CC(C)(C)C1=CC=C(C=C1)C(=O)NC1=CN2C=C(C=CC2=N1)C1=CC=CC=C1 | 4  | RSK3(Kin.Dc | RPS6KA2 | > | 10000 |
| TPKI-58 | CC(C)(C)C1=CC=C(C=C1)C(=O)NC1=CN2C=C(C=CC2=N1)C1=CC=CN=C1 | 6  | ASK1        | MAP3K5  | = | 64    |
| TPKI-58 | CC(C)(C)C1=CC=C(C=C1)C(=O)NC1=CN2C=C(C=CC2=N1)C1=CC=CN=C1 | 6  | CLK1        | CLK1    | = | 280   |
| TPKI-58 | CC(C)(C)C1=CC=C(C=C1)C(=O)NC1=CN2C=C(C=CC2=N1)C1=CC=CN=C1 | 6  | CSNK1E      | CSNK1E  | = | 110   |
| TPKI-58 | CC(C)(C)C1=CC=C(C=C1)C(=O)NC1=CN2C=C(C=CC2=N1)C1=CC=CN=C1 | 6  | KIT         | KIT     | = | 320   |
| TPKI-58 | CC(C)(C)C1=CC=C(C=C1)C(=O)NC1=CN2C=C(C=CC2=N1)C1=CC=CN=C1 | 6  | MEK5        | MAP2K5  | = | 190   |
| TPKI-58 | CC(C)(C)C1=CC=C(C=C1)C(=O)NC1=CN2C=C(C=CC2=N1)C1=CC=CN=C1 | 6  | PDGFRB      | PDGFRB  | = | 220   |
| TPKI-60 | ClC1=C(OC2=CC=C(C=C2)C#N)C=CC(NC2=NC=NC3=C2NC=C3)=C1      | 3  | EGFR        | EGFR    | = | 97    |
| TPKI-61 | FC1=CC(COC2=CC=C(NC3=NC=NC4=C3NC=C4)C=C2Cl)=CC=C1         | 9  | EGFR        | EGFR    | = | 1.3   |
| TPKI-61 | FC1=CC(COC2=CC=C(NC3=NC=NC4=C3NC=C4)C=C2Cl)=CC=C1         | 9  | ERBB2       | ERBB2   | = | 2.2   |
| TPKI-61 | FC1=CC(COC2=CC=C(NC3=NC=NC4=C3NC=C4)C=C2Cl)=CC=C1         | 9  | ERBB4       | ERBB4   | = | 320   |
| TPKI-62 | ClC1=C(OCC2=NC=CC=C2)C=CC(NC2=NC=NC3=C2NC=C3)=C1          | 6  | EGFR        | EGFR    | = | 8.4   |
| TPKI-62 | ClC1=C(OCC2=NC=CC=C2)C=CC(NC2=NC=NC3=C2NC=C3)=C1          | 6  | ERBB2       | ERBB2   | = | 9     |
| TPKI-63 | CC1=CC=C(OC2=C(C)C=C(NC3=NC=NC4=C3NC=C4)C=C2)C=N1         | 5  | ERBB2       | ERBB2   | = | 6.5   |
| TPKI-63 | CC1=CC=C(OC2=C(C)C=C(NC3=NC=NC4=C3NC=C4)C=C2)C=N1         | 5  | FLT1        | FLT1    | > | 10000 |
| TPKI-63 | CC1=CC=C(OC2=C(C)C=C(NC3=NC=NC4=C3NC=C4)C=C2)C=N1         | 5  | MEK5        | MAP2K5  | = | 9     |
| TPKI-63 | CC1=CC=C(OC2=C(C)C=C(NC3=NC=NC4=C3NC=C4)C=C2)C=N1         | 5  | RIOK1       | RIOK1   | > | 10000 |
| TPKI-64 | CN1C=CC2=C1C(NC1=CC(Cl)=C(OC3=CC=CC(Cl)=C3)C=C1)=NC=N2    | 10 | EGFR        | EGFR    | = | 4.3   |
| TPKI-64 | CN1C=CC2=C1C(NC1=CC(Cl)=C(OC3=CC=CC(Cl)=C3)C=C1)=NC=N2    | 10 | EPHA7       | EPHA7   | > | 10000 |
| TPKI-64 | CN1C=CC2=C1C(NC1=CC(Cl)=C(OC3=CC=CC(Cl)=C3)C=C1)=NC=N2    | 10 | EPHA8       | EPHA8   | > | 10000 |

|         |                                                                                     |    |        |         |   |       |
|---------|-------------------------------------------------------------------------------------|----|--------|---------|---|-------|
| TPKI-64 | <chem>CN1C=CC2=C1C(NC1=CC(Cl)=C(OC3=CC=CC(Cl)=C3)C=C1)=NC=N2</chem>                 | 10 | ERBB2  | ERBB2   | = | 1.2   |
| TPKI-64 | <chem>CN1C=CC2=C1C(NC1=CC(Cl)=C(OC3=CC=CC(Cl)=C3)C=C1)=NC=N2</chem>                 | 10 | ERBB4  | ERBB4   | = | 74    |
| TPKI-64 | <chem>CN1C=CC2=C1C(NC1=CC(Cl)=C(OC3=CC=CC(Cl)=C3)C=C1)=NC=N2</chem>                 | 10 | MEK5   | MAP2K5  | = | 25    |
| TPKI-64 | <chem>CN1C=CC2=C1C(NC1=CC(Cl)=C(OC3=CC=CC(Cl)=C3)C=C1)=NC=N2</chem>                 | 10 | TEC    | TEC     | > | 10000 |
| TPKI-65 | <chem>OCCOCCN1C=CC2=C1C(NC1=CC(Cl)=C(OC3=CC=CC(Cl)=C3)C=C1)=NC=N2</chem>            | 8  | EGFR   | EGFR    | = | 8.5   |
| TPKI-65 | <chem>OCCOCCN1C=CC2=C1C(NC1=CC(Cl)=C(OC3=CC=CC(Cl)=C3)C=C1)=NC=N2</chem>            | 8  | ERBB2  | ERBB2   | = | 2.9   |
| TPKI-65 | <chem>OCCOCCN1C=CC2=C1C(NC1=CC(Cl)=C(OC3=CC=CC(Cl)=C3)C=C1)=NC=N2</chem>            | 8  | ERBB4  | ERBB4   | = | 77    |
| TPKI-65 | <chem>OCCOCCN1C=CC2=C1C(NC1=CC(Cl)=C(OC3=CC=CC(Cl)=C3)C=C1)=NC=N2</chem>            | 8  | MEK5   | MAP2K5  | = | 200   |
| TPKI-66 | <chem>OCCC(=O)NCCN1C=CC2=C1C(NC1=CC(Cl)=C(OC3=CC=CC(=C3)C(F)(F)F)C=C1)=NC=N2</chem> | 9  | EGFR   | EGFR    | = | 2.3   |
| TPKI-66 | <chem>OCCC(=O)NCCN1C=CC2=C1C(NC1=CC(Cl)=C(OC3=CC=CC(=C3)C(F)(F)F)C=C1)=NC=N2</chem> | 9  | ERBB2  | ERBB2   | = | 0.88  |
| TPKI-66 | <chem>OCCC(=O)NCCN1C=CC2=C1C(NC1=CC(Cl)=C(OC3=CC=CC(=C3)C(F)(F)F)C=C1)=NC=N2</chem> | 9  | ERBB4  | ERBB4   | = | 100   |
| TPKI-66 | <chem>OCCC(=O)NCCN1C=CC2=C1C(NC1=CC(Cl)=C(OC3=CC=CC(=C3)C(F)(F)F)C=C1)=NC=N2</chem> | 9  | MEK5   | MAP2K5  | = | 15    |
| TPKI-69 | <chem>CN1C=CC2=C1C(OC1=CC=C(NC(=O)NC3=CC=CC=C3)C=C1)=NC=N2</chem>                   | 13 | AURKB  | AURKB   | = | 110   |
| TPKI-69 | <chem>CN1C=CC2=C1C(OC1=CC=C(NC(=O)NC3=CC=CC=C3)C=C1)=NC=N2</chem>                   | 13 | AURKC  | AURKC   | = | 110   |
| TPKI-69 | <chem>CN1C=CC2=C1C(OC1=CC=C(NC(=O)NC3=CC=CC=C3)C=C1)=NC=N2</chem>                   | 13 | CSF1R  | CSF1R   | = | 82    |
| TPKI-69 | <chem>CN1C=CC2=C1C(OC1=CC=C(NC(=O)NC3=CC=CC=C3)C=C1)=NC=N2</chem>                   | 13 | FLT1   | FLT1    | = | 350   |
| TPKI-69 | <chem>CN1C=CC2=C1C(OC1=CC=C(NC(=O)NC3=CC=CC=C3)C=C1)=NC=N2</chem>                   | 13 | FLT3   | FLT3    | = | 33    |
| TPKI-69 | <chem>CN1C=CC2=C1C(OC1=CC=C(NC(=O)NC3=CC=CC=C3)C=C1)=NC=N2</chem>                   | 13 | KIT    | KIT     | = | 0.6   |
| TPKI-69 | <chem>CN1C=CC2=C1C(OC1=CC=C(NC(=O)NC3=CC=CC=C3)C=C1)=NC=N2</chem>                   | 13 | LOK    | STK10   | = | 280   |
| TPKI-69 | <chem>CN1C=CC2=C1C(OC1=CC=C(NC(=O)NC3=CC=CC=C3)C=C1)=NC=N2</chem>                   | 13 | PDGFRA | PDGFRA  | = | 25    |
| TPKI-69 | <chem>CN1C=CC2=C1C(OC1=CC=C(NC(=O)NC3=CC=CC=C3)C=C1)=NC=N2</chem>                   | 13 | PDGFRB | PDGFRB  | = | 16    |
| TPKI-69 | <chem>CN1C=CC2=C1C(OC1=CC=C(NC(=O)NC3=CC=CC=C3)C=C1)=NC=N2</chem>                   | 13 | VEGFR2 | KDR     | = | 45    |
| TPKI-69 | <chem>CN1C=CC2=C1C(OC1=CC=C(NC(=O)NC3=CC=CC=C3)C=C1)=NC=N2</chem>                   | 13 | YSK4   | MAP3K19 | = | 170   |
| TPKI-70 | <chem>CN1C=CC2=C1C(OC1=CC(=CC=C1)C(=O)NC1=CC=CC=C1)=NC=N2</chem>                    | 2  | ACVR1  | ACVR1   | > | 10000 |
| TPKI-70 | <chem>CN1C=CC2=C1C(OC1=CC(=CC=C1)C(=O)NC1=CC=CC=C1)=NC=N2</chem>                    | 2  | LIMK1  | LIMK1   | > | 10000 |
| TPKI-71 | <chem>CCCNC(=O)NC1=CC=C(OC2=NC=NC3=C2N(C)C=C3)C=C1</chem>                           | 1  | KIT    | KIT     | = | 67    |
| TPKI-72 | <chem>CN1C=CC2=C1C(OC1=CC=C(NC3=NC4=C(N3)C=CC=C4)C=C1)=NC=N2</chem>                 | 5  | AURKB  | AURKB   | = | 59    |
| TPKI-72 | <chem>CN1C=CC2=C1C(OC1=CC=C(NC3=NC4=C(N3)C=CC=C4)C=C1)=NC=N2</chem>                 | 5  | LOK    | STK10   | = | 200   |

|         |                                                          |   |             |         |   |       |
|---------|----------------------------------------------------------|---|-------------|---------|---|-------|
| TPKI-72 | CN1C=CC2=C1C(OC1=CC=C(NC3=NC4=C(N3)C=CC=C4)C=C1)=NC=N2   | 5 | NEK4        | NEK4    | > | 10000 |
| TPKI-72 | CN1C=CC2=C1C(OC1=CC=C(NC3=NC4=C(N3)C=CC=C4)C=C1)=NC=N2   | 5 | TRPM6       | TRPM6   | > | 10000 |
| TPKI-73 | CN1C=CC2=C1C(OC1=CC=C(NC(=O)NC3=CC=CN=C3)C(Cl)=C1)=NC=N2 | 8 | CSF1R       | CSF1R   | = | 290   |
| TPKI-73 | CN1C=CC2=C1C(OC1=CC=C(NC(=O)NC3=CC=CN=C3)C(Cl)=C1)=NC=N2 | 8 | DDR1        | DDR1    | = | 57    |
| TPKI-73 | CN1C=CC2=C1C(OC1=CC=C(NC(=O)NC3=CC=CN=C3)C(Cl)=C1)=NC=N2 | 8 | DDR2        | DDR2    | = | 76    |
| TPKI-73 | CN1C=CC2=C1C(OC1=CC=C(NC(=O)NC3=CC=CN=C3)C(Cl)=C1)=NC=N2 | 8 | KIT         | KIT     | = | 47    |
| TPKI-73 | CN1C=CC2=C1C(OC1=CC=C(NC(=O)NC3=CC=CN=C3)C(Cl)=C1)=NC=N2 | 8 | PDGFRA      | PDGFRA  | = | 110   |
| TPKI-73 | CN1C=CC2=C1C(OC1=CC=C(NC(=O)NC3=CC=CN=C3)C(Cl)=C1)=NC=N2 | 8 | PDGFRB      | PDGFRB  | = | 95    |
| TPKI-74 | CN1C=CC2=C1C(OC1=CC=C(NC(=O)NC3=CC=NC=C3)C(Cl)=C1)=NC=N2 | 1 | STK39       | STK39   | > | 10000 |
| TPKI-79 | COC1=CC=C(C=C1)C1=COC2=CC=C(C=C12)C1=NN=C(C)O1           | 3 | BRSK2       | BRSK2   | > | 10000 |
| TPKI-79 | COC1=CC=C(C=C1)C1=COC2=CC=C(C=C12)C1=NN=C(C)O1           | 3 | MARK1       | MARK1   | > | 10000 |
| TPKI-79 | COC1=CC=C(C=C1)C1=COC2=CC=C(C=C12)C1=NN=C(C)O1           | 3 | MARK4       | MARK4   | > | 10000 |
| TPKI-80 | CC(O)C1=CC=C(C=C1)C1=COC2=C1C=C(C=C2)C1=NN=C(C)O1        | 1 | PIM2        | PIM2    | = | 940   |
| TPKI-80 | CCS(=O)C1=CC=C(C=C1)C1=COC2=C1C=C(C=C2)C1=NN=C(C)O1      | 1 | RAF1        | RAF1    | > | 10000 |
| TPKI-81 | CCS(=O)C1=CC=C(C=C1)C1=COC2=C1C=C(C=C2)C1=NN=C(C)O1      | 2 | GSK3A       | GSK3A   | = | 260   |
| TPKI-81 | CCS(=O)C1=CC=C(C=C1)C1=COC2=C1C=C(C=C2)C1=NN=C(C)O1      | 2 | PIP5K2C     | PIP4K2C | = | 85    |
| TPKI-82 | CC1=NN=C(O1)C1=CC2=C(C=C1)N=CN2C1=CC=C(C=C1)S(C)=O       | 3 | MAP4K2      | MAP4K2  | > | 10000 |
| TPKI-82 | CC1=NN=C(O1)C1=CC2=C(C=C1)N=CN2C1=CC=C(C=C1)S(C)=O       | 3 | TAOK1       | TAOK1   | > | 10000 |
| TPKI-82 | CC1=NN=C(O1)C1=CC2=C(C=C1)N=CN2C1=CC=C(C=C1)S(C)=O       | 3 | TAOK3       | TAOK3   | > | 10000 |
| TPKI-83 | CC1=NN=C(O1)C1=CN2C(C=C1)=NC=C2C1=CC=C(C=C1)S(C)=O       | 0 | PDGFRB      | PDGFRB  | = | 490   |
| TPKI-85 | CC1=NN=C(N1)C1=CC=C2OC=C(C2=C1)C1=CC=C(C=C1)S(C)=O       | 4 | AMPK-alpha2 | PRKAA1  | > | 10000 |
| TPKI-85 | CC1=NN=C(N1)C1=CC=C2OC=C(C2=C1)C1=CC=C(C=C1)S(C)=O       | 4 | GSK3A       | GSK3A   | = | 190   |
| TPKI-85 | CC1=NN=C(N1)C1=CC=C2OC=C(C2=C1)C1=CC=C(C=C1)S(C)=O       | 4 | HIPK2       | HIPK2   | = | 320   |
| TPKI-85 | CC1=NN=C(N1)C1=CC=C2OC=C(C2=C1)C1=CC=C(C=C1)S(C)=O       | 4 | HIPK3       | HIPK3   | = | 340   |
| TPKI-85 | CC1=NN=C(N1)C1=CC=C2OC=C(C2=C1)C1=CC=C(C=C1)S(C)=O       | 4 | JAK1(JH2do  | JAK1    | = | 190   |
| TPKI-85 | CC1=NN=C(N1)C1=CC=C2OC=C(C2=C1)C1=CC=C(C=C1)S(C)=O       | 4 | LOK         | STK10   | > | 10000 |
| TPKI-85 | CC1=NN=C(N1)C1=CC=C2OC=C(C2=C1)C1=CC=C(C=C1)S(C)=O       | 4 | RIPK1       | RIPK1   | > | 10000 |

|         |                                                         |   |        |         |   |       |
|---------|---------------------------------------------------------|---|--------|---------|---|-------|
| TPKI-85 | CC1=NN=C(N1)C1=CC=C2OC=C(C2=C1)C1=CC=C(C=C1)S(C)=O      | 4 | VPS34  | PIK3C3  | = | 62    |
| TPKI-88 | FC1=CC(CSC2=NN=C(O2)C2=CC3=C(OCC3)C=C2)=CC=C1           | 1 | IRAK4  | IRAK4   | > | 10000 |
| TPKI-89 | COC1=CC=C(CSC2=NN=C(O2)C2=CC3=C(OCC3)C=C2)C=C1          | 0 | CDC2L5 | CDK13   | > | 10000 |
| TPKI-89 | COC1=CC=C(CSC2=NN=C(O2)C2=CC3=C(OCC3)C=C2)C=C1          | 0 | CLK4   | CLK4    | = | 1300  |
| TPKI-90 | FC1=CC(COC2=NN=C(O2)C2=CC3=C(OCC3)C=C2)=CC=C1           | 1 | ACVR2B | ACVR2B  | > | 10000 |
| TPKI-91 | COC1=CC=C(CSC2=NN=C(O2)C2=CC3=C(C=C2)N=CS3)C=C1C(F)(F)F | 2 | CLK1   | CLK1    | = | 170   |
| TPKI-91 | COC1=CC=C(CSC2=NN=C(O2)C2=CC3=C(C=C2)N=CS3)C=C1C(F)(F)F | 2 | CLK4   | CLK4    | = | 1100  |
| TPKI-91 | COC1=CC=C(CSC2=NN=C(O2)C2=CC3=C(C=C2)N=CS3)C=C1C(F)(F)F | 2 | GSK3A  | GSK3A   | = | 79    |
| TPKI-91 | COC1=CC=C(CSC2=NN=C(O2)C2=CC3=C(C=C2)N=CS3)C=C1C(F)(F)F | 2 | GSK3B  | GSK3B   | = | 39    |
| TPKI-92 | COC1=C(C=C(CSC2=NN=C(O2)C2=CN3C=CN=C3C=C2)C=C1)C(F)(F)F | 6 | CLK1   | CLK1    | = | 70    |
| TPKI-92 | COC1=C(C=C(CSC2=NN=C(O2)C2=CN3C=CN=C3C=C2)C=C1)C(F)(F)F | 6 | CLK2   | CLK2    | = | 150   |
| TPKI-92 | COC1=C(C=C(CSC2=NN=C(O2)C2=CN3C=CN=C3C=C2)C=C1)C(F)(F)F | 6 | CLK4   | CLK4    | = | 130   |
| TPKI-92 | COC1=C(C=C(CSC2=NN=C(O2)C2=CN3C=CN=C3C=C2)C=C1)C(F)(F)F | 6 | GSK3A  | GSK3A   | = | 250   |
| TPKI-92 | COC1=C(C=C(CSC2=NN=C(O2)C2=CN3C=CN=C3C=C2)C=C1)C(F)(F)F | 6 | GSK3B  | GSK3B   | = | 22    |
| TPKI-92 | COC1=C(C=C(CSC2=NN=C(O2)C2=CN3C=CN=C3C=C2)C=C1)C(F)(F)F | 6 | YSK4   | MAP3K19 | = | 22    |
| TPKI-94 | COC1=CC=C(C=C1)C1=COC2=C1C=C(C=C2)C1=NN=C(O1)S          | 1 | GSK3A  | GSK3A   | = | 150   |
| TPKI-94 | CC1=CC=CC(=C1)C#N                                       | 1 | ULK3   | ULK3    | > | 10000 |
| TPKI-95 | COC(=O)C1=C(C2=CC=CC=C2)C2=CC(Br)=CC=C2C(=O)N1C         | 6 | JNK1   | MAPK8   | = | 58    |
| TPKI-95 | C1=CC=C(NC(=O)CCC(O)=O)C=C1                             | 6 | JNK2   | MAPK9   | = | 66    |
| TPKI-95 | COC(=O)C1=C(C2=CC=CC=C2)C2=CC(Br)=CC=C2C(=O)N1C         | 6 | JNK3   | MAPK10  | = | 13    |
| TPKI-95 | C1=CC=C(NC(=O)CCC(O)=O)C=C1                             | 6 | MYO3A  | MYO3A   | > | 10000 |
| TPKI-96 | COC(=O)C1=C(C2=CC=CC=C2)C2=CC(C)=CC=C2C(=O)N1CC         | 3 | NIK    | MAP3K14 | > | 10000 |
| TPKI-96 | 1=CC=CC=C1                                              | 3 | PDGFRB | PDGFRB  | = | 170   |
| TPKI-97 | COC(=O)C1=C(C2=CC=CC=C2)C2=CC(OC)=CC=C2C(=O)N1C         | 4 | BRAF   | BRAF    | = | 61    |
| TPKI-97 | C1=CC=CC=C1                                             | 4 | DDR1   | DDR1    | = | 280   |
| TPKI-97 | COC(=O)C1=C(C2=CC=CC=C2)C2=CC(OC)=CC=C2C(=O)N1C         | 4 | JNK3   | MAPK10  | = | 110   |
| TPKI-97 | C1=CC=CC=C1                                             | 4 | KIT    | KIT     | = | 170   |
| TPKI-97 | COC(=O)C1=C(C2=CC=CC=C2)C2=CC(OC)=CC=C2C(=O)N1C         | 4 | PDGFRB | PDGFRB  | = | 110   |
| TPKI-97 | C1=CC=CC=C1                                             | 4 | PDGFRB | PDGFRB  | = | 110   |

|              |                                                                            |    |         |         |   |       |
|--------------|----------------------------------------------------------------------------|----|---------|---------|---|-------|
| TPKI-97      | COC(=O)C1=C(C2=CC=CC=C2)C2=CC(OC)=CC=C2C(=O)N1C<br>C1=CC=CC=C1             | 4  | RAF1    | RAF1    | = | 390   |
| TPKI-98      | COC(=O)C1=C(C2=CC=CC=C2)C2=CC(=CC=C2C(=O)N1CC1=<br>CC=CC=C1)C(O)=O         | 8  | BRAF    | BRAF    | = | 50    |
| TPKI-98      | COC(=O)C1=C(C2=CC=CC=C2)C2=CC(=CC=C2C(=O)N1CC1=<br>CC=CC=C1)C(O)=O         | 8  | DDR1    | DDR1    | = | 160   |
| TPKI-98      | COC(=O)C1=C(C2=CC=CC=C2)C2=CC(=CC=C2C(=O)N1CC1=<br>CC=CC=C1)C(O)=O         | 8  | KIT     | KIT     | = | 100   |
| TPKI-98      | COC(=O)C1=C(C2=CC=CC=C2)C2=CC(=CC=C2C(=O)N1CC1=<br>CC=CC=C1)C(O)=O         | 8  | PDGFRB  | PDGFRB  | = | 75    |
| TPKI-98      | COC(=O)C1=C(C2=CC=CC=C2)C2=CC(=CC=C2C(=O)N1CC1=<br>CC=CC=C1)C(O)=O         | 8  | RAF1    | RAF1    | = | 170   |
| TPKI-99      | COC(=O)C1=C(C2=CC=CC=C2)C2=CC(Cl)=CC=C2C(=O)N1C<br>C1=CC=C(C=C1)S(C)(=O)=O | 5  | CSNK1G1 | CSNK1G1 | > | 10000 |
| TPKI-99      | COC(=O)C1=C(C2=CC=CC=C2)C2=CC(Cl)=CC=C2C(=O)N1C<br>C1=CC=C(C=C1)S(C)(=O)=O | 5  | GAK     | GAK     | > | 10000 |
| TPKI-99      | COC(=O)C1=C(C2=CC=CC=C2)C2=CC(Cl)=CC=C2C(=O)N1C<br>C1=CC=C(C=C1)S(C)(=O)=O | 5  | JNK1    | MAPK8   | = | 61    |
| TPKI-99      | COC(=O)C1=C(C2=CC=CC=C2)C2=CC(Cl)=CC=C2C(=O)N1C<br>C1=CC=C(C=C1)S(C)(=O)=O | 5  | JNK2    | MAPK9   | = | 44    |
| TPKI-99      | COC(=O)C1=C(C2=CC=CC=C2)C2=CC(Cl)=CC=C2C(=O)N1C<br>C1=CC=C(C=C1)S(C)(=O)=O | 5  | JNK3    | MAPK10  | = | 14    |
| TPKI-99      | COC(=O)C1=C(C2=CC=CC=C2)C2=CC(Cl)=CC=C2C(=O)N1C<br>C1=CC=C(C=C1)S(C)(=O)=O | 5  | NEK2    | NEK2    | > | 10000 |
| UNC10112604A | c1ccc2ncnc(Nc3ccc(OCc4ccccc4)c(Cl)c3)c2c1<br>Cl.CS(=O)(=O)CCNCc1ccc(o1)-   | 13 | EGFR    | EGFR    | = | 0.82  |
| UNC10112604A | c1ccc2ncnc(Nc3ccc(OCc4ccccc4)c(Cl)c3)c2c1<br>Cl.CS(=O)(=O)CCNCc1ccc(o1)-   | 13 | ERBB2   | ERBB2   | = | 2.8   |
| UNC10112604A | c1ccc2ncnc(Nc3ccc(OCc4ccccc4)c(Cl)c3)c2c1<br>Cl.CS(=O)(=O)CCNCc1ccc(o1)-   | 13 | ERBB4   | ERBB4   | = | 28    |
| UNC10112604A | c1ccc2ncnc(Nc3ccc(OCc4ccccc4)c(Cl)c3)c2c1<br>Cl.CS(=O)(=O)CCNCc1ccc(o1)-   | 13 | MEK5    | MAP2K5  | = | 1000  |
| UNC10112604A | c1ccc2ncnc(Nc3ccc(OCc4ccccc4)c(Cl)c3)c2c1                                  | 13 | NIK     | MAP3K14 | > | 10000 |
| UNC10112764A | Cl.NS(=O)(=O)c1cccc(Nc2cc(n[nH]2)-c2ccc(F)cc2)c1                           | 2  | FLT3    | FLT3    | = | 7.5   |
| UNC10112764A | Cl.NS(=O)(=O)c1cccc(Nc2cc(n[nH]2)-c2ccc(F)cc2)c1                           | 2  | KIT     | KIT     | = | 16    |
| UNC10112764A | Cl.NS(=O)(=O)c1cccc(Nc2cc(n[nH]2)-c2ccc(F)cc2)c1                           | 2  | PDGFRB  | PDGFRB  | = | 210   |
| UNC10112764A | Cl.NS(=O)(=O)c1cccc(Nc2cc(n[nH]2)-c2ccc(F)cc2)c1                           | 2  | SGK2    | SGK2    | > | 10000 |
| UNC10112830A | CCn1c(nc2ccccc12)-c1nonc1N                                                 | 0  | LATS2   | LATS2   | = | 1800  |
| UNC10112830A | CCn1c(nc2ccccc12)-c1nonc1N                                                 | 0  | LRRK2   | LRRK2   | > | 10000 |
| UNC10112830A | CCn1c(nc2ccccc12)-c1nonc1N                                                 | 0  | YSK4    | MAP3K19 | = | 10    |
| UNC10224985A | Cc1ccc(NC(=O)c2ccc(Cl)cc2)cc1-<br>c1ccc(cc1)C(=O)Nc1ccncc1                 | 8  | CAMK2A  | CAMK2A  | > | 10000 |
| UNC10224985A | Cc1ccc(NC(=O)c2ccc(Cl)cc2)cc1-<br>c1ccc(cc1)C(=O)Nc1ccncc1                 | 8  | CAMK2B  | CAMK2B  | > | 10000 |
| UNC10224985A | Cc1ccc(NC(=O)c2ccc(Cl)cc2)cc1-<br>c1ccc(cc1)C(=O)Nc1ccncc1                 | 8  | CLK2    | CLK2    | > | 10000 |
| UNC10224985A | Cc1ccc(NC(=O)c2ccc(Cl)cc2)cc1-<br>c1ccc(cc1)C(=O)Nc1ccncc1                 | 8  | CSF1R   | CSF1R   | = | 880   |
| UNC10224985A | Cc1ccc(NC(=O)c2ccc(Cl)cc2)cc1-<br>c1ccc(cc1)C(=O)Nc1ccncc1                 | 8  | DDR1    | DDR1    | = | 710   |
| UNC10224985A | Cc1ccc(NC(=O)c2ccc(Cl)cc2)cc1-<br>c1ccc(cc1)C(=O)Nc1ccncc1                 | 8  | EPHA3   | EPHA3   | > | 10000 |
| UNC10224985A | Cc1ccc(NC(=O)c2ccc(Cl)cc2)cc1-<br>c1ccc(cc1)C(=O)Nc1ccncc1                 | 8  | KIT     | KIT     | = | 170   |

|              |                                                                    |    |            |         |   |       |
|--------------|--------------------------------------------------------------------|----|------------|---------|---|-------|
| UNC10224985A | Cc1ccc(NC(=O)c2ccc(Cl)cc2)cc1-c1ccc(cc1)C(=O)Nc1ccncc1             | 8  | LRRK2      | LRRK2   | > | 10000 |
| UNC10224985A | Cc1ccc(NC(=O)c2ccc(Cl)cc2)cc1-c1ccc(cc1)C(=O)Nc1ccncc1             | 8  | MARK2      | MARK2   | > | 10000 |
| UNC10224985A | Cc1ccc(NC(=O)c2ccc(Cl)cc2)cc1-c1ccc(cc1)C(=O)Nc1ccncc1             | 8  | PDGFRB     | PDGFRB  | = | 9.7   |
| UNC10224990A | Cl.Fc1cccc(c1)S(=O)(=O)c1ccc(Nc2ncnc3cc(Br)sc23)cc1Cl              | 12 | EGFR       | EGFR    | = | 61    |
| UNC10224990A | Cl.Fc1cccc(c1)S(=O)(=O)c1ccc(Nc2ncnc3cc(Br)sc23)cc1Cl              | 12 | ERBB2      | ERBB2   | = | 95    |
| UNC10224990A | Cl.Fc1cccc(c1)S(=O)(=O)c1ccc(Nc2ncnc3cc(Br)sc23)cc1Cl              | 12 | FLT4       | FLT4    | > | 10000 |
| UNC10224990A | Cl.Fc1cccc(c1)S(=O)(=O)c1ccc(Nc2ncnc3cc(Br)sc23)cc1Cl              | 12 | RET        | RET     | > | 10000 |
| UNC10224990A | Cl.Fc1cccc(c1)S(=O)(=O)c1ccc(Nc2ncnc3cc(Br)sc23)cc1Cl              | 12 | SRPK1      | SRPK1   | > | 10000 |
| UNC10224992A | Cc1ccc(NC(=O)Nc2cccc2)cc1-c1ccc(cc1)C(=O)Nc1ccncc1                 | 8  | CIT        | CIT     | = | 540   |
| UNC10224992A | Cc1ccc(NC(=O)Nc2cccc2)cc1-c1ccc(cc1)C(=O)Nc1ccncc1                 | 8  | CSF1R      | CSF1R   | = | 3300  |
| UNC10224992A | Cc1ccc(NC(=O)Nc2cccc2)cc1-c1ccc(cc1)C(=O)Nc1ccncc1                 | 8  | DDR1       | DDR1    | = | 180   |
| UNC10224992A | Cc1ccc(NC(=O)Nc2cccc2)cc1-c1ccc(cc1)C(=O)Nc1ccncc1                 | 8  | KIT        | KIT     | = | 140   |
| UNC10224992A | Cc1ccc(NC(=O)Nc2cccc2)cc1-c1ccc(cc1)C(=O)Nc1ccncc1                 | 8  | PDGFRB     | PDGFRB  | = | 28    |
| UNC10224992A | Cc1ccc(NC(=O)Nc2cccc2)cc1-c1ccc(cc1)C(=O)Nc1ccncc1                 | 8  | YSK4       | MAP3K19 | = | 71    |
| UNC10224993A | Cl.Cc1cc(nc(Nc2ccc(cc2)S(=O)(=O)N2CCOCC2)n1)N1Cc2ccc2C1            | 8  | AKT1       | AKT1    | > | 10000 |
| UNC10224993A | Cl.Cc1cc(nc(Nc2ccc(cc2)S(=O)(=O)N2CCOCC2)n1)N1Cc2ccc2C1            | 8  | DAPK3      | DAPK3   | > | 10000 |
| UNC10224993A | Cl.Cc1cc(nc(Nc2ccc(cc2)S(=O)(=O)N2CCOCC2)n1)N1Cc2ccc2C1            | 8  | ICK        | ICK     | > | 10000 |
| UNC10224993A | Cl.Cc1cc(nc(Nc2ccc(cc2)S(=O)(=O)N2CCOCC2)n1)N1Cc2ccc2C1            | 8  | INSR       | INSR    | > | 10000 |
| UNC10224993A | Cl.Cc1cc(nc(Nc2ccc(cc2)S(=O)(=O)N2CCOCC2)n1)N1Cc2ccc2C1            | 8  | PIK4CB     | PI4KB   | > | 10000 |
| UNC10224993A | Cl.Cc1cc(nc(Nc2ccc(cc2)S(=O)(=O)N2CCOCC2)n1)N1Cc2ccc2C1            | 8  | RIPK4      | RIPK4   | > | 10000 |
| UNC10224994A | CNc1nc(cc(n1)-c1ccc2c(N)n[nH]c2c1)N1C[C@H](OC[C@H]1C)C(=O)NC1CCCC1 | 1  | CDK4       | CDK4    | > | 10000 |
| UNC10224995A | CS(=O)(=O)c1ccc(cc1)-c1nc2CCn2c1-c1ccncc1                          | 12 | AKT2       | AKT2    | > | 10000 |
| UNC10224995A | CS(=O)(=O)c1ccc(cc1)-c1nc2CCn2c1-c1ccncc1                          | 12 | CDC2L1     | CDK11B  | > | 10000 |
| UNC10224995A | CS(=O)(=O)c1ccc(cc1)-c1nc2CCn2c1-c1ccncc1                          | 12 | CDK9       | CDK9    | > | 10000 |
| UNC10224995A | CS(=O)(=O)c1ccc(cc1)-c1nc2CCn2c1-c1ccncc1                          | 12 | CSK        | CSK     | > | 10000 |
| UNC10224995A | CS(=O)(=O)c1ccc(cc1)-c1nc2CCn2c1-c1ccncc1                          | 12 | ERK4       | MAPK4   | > | 10000 |
| UNC10224995A | CS(=O)(=O)c1ccc(cc1)-c1nc2CCn2c1-c1ccncc1                          | 12 | ICK        | ICK     | > | 10000 |
| UNC10224995A | CS(=O)(=O)c1ccc(cc1)-c1nc2CCn2c1-c1ccncc1                          | 12 | PAK6       | PAK6    | > | 10000 |
| UNC10224995A | CS(=O)(=O)c1ccc(cc1)-c1nc2CCn2c1-c1ccncc1                          | 12 | PIK4CB     | PI4KB   | > | 10000 |
| UNC10224995A | CS(=O)(=O)c1ccc(cc1)-c1nc2CCn2c1-c1ccncc1                          | 12 | RIPK4      | RIPK4   | > | 10000 |
| UNC10224995A | CS(=O)(=O)c1ccc(cc1)-c1nc2CCn2c1-c1ccncc1                          | 12 | STK16      | STK16   | > | 10000 |
| UNC10224995A | CS(=O)(=O)c1ccc(cc1)-c1nc2CCn2c1-c1ccncc1                          | 12 | TSSK1B     | TSSK1B  | > | 10000 |
| UNC10224995A | CS(=O)(=O)c1ccc(cc1)-c1nc2CCn2c1-c1ccncc1                          | 12 | YANK3      | STK32C  | > | 10000 |
| UNC10224997A | Cc1cccc(n1)-c1nc(Nc2ccnc(C)c2)c2cccc2n1                            | 2  | JAK1(JH2do | JAK1    | = | 410   |
| UNC10224997A | Cc1cccc(n1)-c1nc(Nc2ccnc(C)c2)c2cccc2n1                            | 2  | PRKD1      | PRKD1   | = | 6.1   |
| UNC10224997A | Cc1cccc(n1)-c1nc(Nc2ccnc(C)c2)c2cccc2n1                            | 2  | PRKD2      | PRKD2   | = | 9.4   |
| UNC10224997A | Cc1cccc(n1)-c1nc(Nc2ccnc(C)c2)c2cccc2n1                            | 2  | TGFBR1     | TGFBR1  | = | 270   |
| UNC10224998A | CCCc1ccc(cc1)S(=O)(=O)NC1CCN(C1)c1ccnc(Nc2ccc(F)cc2)n1             | 7  | AKT2       | AKT2    | > | 10000 |
| UNC10224998A | CCCc1ccc(cc1)S(=O)(=O)NC1CCN(C1)c1ccnc(Nc2ccc(F)cc2)n1             | 7  | CDC2L5     | CDK13   | > | 10000 |
| UNC10224998A | CCCc1ccc(cc1)S(=O)(=O)NC1CCN(C1)c1ccnc(Nc2ccc(F)cc2)n1             | 7  | GRK1       | GRK1    | > | 10000 |



|              |                                                                                            |   |            |         |   |       |
|--------------|--------------------------------------------------------------------------------------------|---|------------|---------|---|-------|
| UNC10224998A | CCCc1ccc(cc1)S(=O)(=O)NC1CCN(C1)c1ccnc(Nc2ccc(F)cc2)n1                                     | 7 | MEK6       | MAP2K6  | > | 10000 |
| UNC10224998A | CCCc1ccc(cc1)S(=O)(=O)NC1CCN(C1)c1ccnc(Nc2ccc(F)cc2)n1                                     | 7 | NEK1       | NEK1    | > | 10000 |
| UNC10224998A | CCCc1ccc(cc1)S(=O)(=O)NC1CCN(C1)c1ccnc(Nc2ccc(F)cc2)n1                                     | 7 | PDPK1      | PDPK1   | > | 10000 |
| UNC10224998A | CCCc1ccc(cc1)S(=O)(=O)NC1CCN(C1)c1ccnc(Nc2ccc(F)cc2)n1                                     | 7 | PKAC-alpha | PRKACA  | > | 10000 |
| UNC10224998A | CCCc1ccc(cc1)S(=O)(=O)NC1CCN(C1)c1ccnc(Nc2ccc(F)cc2)n1                                     | 7 | TSSK1B     | TSSK1B  | > | 10000 |
| UNC10224998A | CCCc1ccc(cc1)S(=O)(=O)NC1CCN(C1)c1ccnc(Nc2ccc(F)cc2)n1                                     | 7 | YANK3      | STK32C  | > | 10000 |
| UNC10224998A | CCCc1ccc(cc1)S(=O)(=O)NC1CCN(C1)c1ccnc(Nc2ccc(F)cc2)n1                                     | 7 | YSK1       | STK25   | > | 10000 |
| UNC10225000A | Nc1ncnc2occ(-c3ccc4N(CCc4c3)C(=O)Cc3cc(F)ccc3F)c12                                         | 2 | CDK11      | CDK19   | = | 1100  |
| UNC10225000A | Nc1ncnc2occ(-c3ccc4N(CCc4c3)C(=O)Cc3cc(F)ccc3F)c12                                         | 2 | EPHB6      | EPHB6   | = | 500   |
| UNC10225000A | Nc1ncnc2occ(-c3ccc4N(CCc4c3)C(=O)Cc3cc(F)ccc3F)c12                                         | 2 | MEK5       | MAP2K5  | = | 750   |
| UNC10225000A | Nc1ncnc2occ(-c3ccc4N(CCc4c3)C(=O)Cc3cc(F)ccc3F)c12                                         | 2 | RIPK1      | RIPK1   | = | 410   |
| UNC10225002A | Fc1cccc(c1)-c1ccc2c(NC(=O)C3CC3)n[nH]c2c1                                                  | 1 | NLK        | NLK     | = | 87    |
| UNC10225002A | Fc1cccc(c1)-c1ccc2c(NC(=O)C3CC3)n[nH]c2c1                                                  | 1 | YSK4       | MAP3K19 | = | 310   |
| UNC10225004A | COc1cccc1-c1ccc2c(NC(=O)C3CC3)n[nH]c2n1                                                    | 2 | ABL1-phosp | ABL1    | > | 10000 |
| UNC10225004A | COc1cccc1-c1ccc2c(NC(=O)C3CC3)n[nH]c2n1                                                    | 2 | ULK3       | ULK3    | > | 10000 |
| UNC10225005A | CC1CN(CCO1)c1cc(=O)n2nc(C)n(Cc3cccc(c3C)C(F)(F)F)c2n1                                      | 2 | PIK3CB     | PIK3CB  | = | 0.67  |
| UNC10225005A | CC1CN(CCO1)c1cc(=O)n2nc(C)n(Cc3cccc(c3C)C(F)(F)F)c2n1                                      | 2 | PIK3CD     | PIK3CD  | = | 80    |
| UNC10225006A | OC(=O)C(F)(F)F.OC(=O)C(F)(F)F.Nc1n[nH]c2cc(ccc12)-c1cc(nc(N)n1)N1CCC[C@H](C1)C(=O)Nc1cccc1 | 5 | CSNK1G2    | CSNK1G2 | > | 10000 |
| UNC10225006A | OC(=O)C(F)(F)F.OC(=O)C(F)(F)F.Nc1n[nH]c2cc(ccc12)-c1cc(nc(N)n1)N1CCC[C@H](C1)C(=O)Nc1cccc1 | 5 | ERK1       | MAPK3   | = | 5300  |
| UNC10225006A | OC(=O)C(F)(F)F.OC(=O)C(F)(F)F.Nc1n[nH]c2cc(ccc12)-c1cc(nc(N)n1)N1CCC[C@H](C1)C(=O)Nc1cccc1 | 5 | IGF1R      | IGF1R   | > | 10000 |
| UNC10225006A | OC(=O)C(F)(F)F.OC(=O)C(F)(F)F.Nc1n[nH]c2cc(ccc12)-c1cc(nc(N)n1)N1CCC[C@H](C1)C(=O)Nc1cccc1 | 5 | JAK2(JH1do | JAK2    | > | 10000 |
| UNC10225006A | OC(=O)C(F)(F)F.OC(=O)C(F)(F)F.Nc1n[nH]c2cc(ccc12)-c1cc(nc(N)n1)N1CCC[C@H](C1)C(=O)Nc1cccc1 | 5 | PDPK1      | PDPK1   | = | 25    |
| UNC10225006A | OC(=O)C(F)(F)F.OC(=O)C(F)(F)F.Nc1n[nH]c2cc(ccc12)-c1cc(nc(N)n1)N1CCC[C@H](C1)C(=O)Nc1cccc1 | 5 | RIOK3      | RIOK3   | = | 570   |
| UNC10225008A | Cc1cccc(n1)-c1cc(Nc2ccncc2)c2cccc2n1                                                       | 6 | ACVR1B     | ACVR1B  | = | 31    |
| UNC10225008A | Cc1cccc(n1)-c1cc(Nc2ccncc2)c2cccc2n1                                                       | 6 | JAK2(JH1do | JAK2    | > | 10000 |
| UNC10225008A | Cc1cccc(n1)-c1cc(Nc2ccncc2)c2cccc2n1                                                       | 6 | PRKD1      | PRKD1   | = | 100   |
| UNC10225008A | Cc1cccc(n1)-c1cc(Nc2ccncc2)c2cccc2n1                                                       | 6 | PRKD2      | PRKD2   | = | 300   |
| UNC10225008A | Cc1cccc(n1)-c1cc(Nc2ccncc2)c2cccc2n1                                                       | 6 | PRKD3      | PRKD3   | = | 210   |
| UNC10225008A | Cc1cccc(n1)-c1cc(Nc2ccncc2)c2cccc2n1                                                       | 6 | RPS6KA5(Ki | RPS6KA5 | > | 10000 |
| UNC10225008A | Cc1cccc(n1)-c1cc(Nc2ccncc2)c2cccc2n1                                                       | 6 | TGFBR1     | TGFBR1  | = | 20    |
| UNC10225008A | Cc1cccc(n1)-c1cc(Nc2ccncc2)c2cccc2n1                                                       | 6 | TXK        | TXK     | > | 10000 |
| UNC10225008A | Cc1cccc(n1)-c1cc(Nc2ccncc2)c2cccc2n1                                                       | 6 | ZAK        | ZAK     | > | 10000 |
| UNC10225009A | CN1CCN(CC1)c1cc(ccn1)C(=O)Nc1ccc(C)c(c1)-c1ccc(cc1)C(=O)NCC1CC1                            | 3 | PDGFRB     | PDGFRB  | = | 300   |
| UNC10225009A | CN1CCN(CC1)c1cc(ccn1)C(=O)Nc1ccc(C)c(c1)-c1ccc(cc1)C(=O)NCC1CC1                            | 3 | TYK2(JH1do | TYK2    | > | 10000 |
| UNC10225009A | CN1CCN(CC1)c1cc(ccn1)C(=O)Nc1ccc(C)c(c1)-c1ccc(cc1)C(=O)NCC1CC1                            | 3 | ULK2       | ULK2    | > | 10000 |
| UNC10225010A | COc1ccc(Nc2ncccc2)N2CCC(C2)NC(=O)C(C)c2ccc(Cl)cc2)c1                                       | 1 | CDKL1      | CDKL1   | > | 10000 |

|              |                                                                                |    |         |         |   |       |
|--------------|--------------------------------------------------------------------------------|----|---------|---------|---|-------|
| UNC10225010A | <chem>COc1ccc(Nc2nccc(n2)N2CCC(C2)NC(=O)C(C)c2ccc(Cl)cc2)c1</chem>             | 1  | PRKG2   | PRKG2   | > | 10000 |
| UNC10225013A | <chem>Cl.COC1cc2nccc(Nc3ccc(NC(=O)c4ccc(C)cc4)c(O)c3)c2cc1</chem>              | 5  | BLK     | BLK     | = | 230   |
| UNC10225013A | <chem>Cl.COC1cc2nccc(Nc3ccc(NC(=O)c4ccc(C)cc4)c(O)c3)c2cc1</chem>              | 5  | CLK3    | CLK3    | > | 10000 |
| UNC10225013A | <chem>Cl.COC1cc2nccc(Nc3ccc(NC(=O)c4ccc(C)cc4)c(O)c3)c2cc1</chem>              | 5  | LCK     | LCK     | = | 560   |
| UNC10225013A | <chem>Cl.COC1cc2nccc(Nc3ccc(NC(=O)c4ccc(C)cc4)c(O)c3)c2cc1</chem>              | 5  | MEK5    | MAP2K5  | = | 8.7   |
| UNC10225013A | <chem>Cl.COC1cc2nccc(Nc3ccc(NC(=O)c4ccc(C)cc4)c(O)c3)c2cc1</chem>              | 5  | PFTK1   | CDK14   | > | 10000 |
| UNC10225013A | <chem>Cl.COC1cc2nccc(Nc3ccc(NC(=O)c4ccc(C)cc4)c(O)c3)c2cc1</chem>              | 5  | PIK3C2B | PIK3C2B | > | 10000 |
| UNC10225013A | <chem>Cl.COC1cc2nccc(Nc3ccc(NC(=O)c4ccc(C)cc4)c(O)c3)c2cc1</chem>              | 5  | PIK3CA  | PIK3CA  | > | 10000 |
| UNC10225013A | <chem>Cl.COC1cc2nccc(Nc3ccc(NC(=O)c4ccc(C)cc4)c(O)c3)c2cc1</chem>              | 5  | PIK3CG  | PIK3CG  | > | 10000 |
| UNC10225014A | <chem>Clc1ccc(cc1)C1=C(Nc2ccccc2)C(=O)NC1=O</chem>                             | 1  | ZAP70   | ZAP70   | > | 10000 |
| UNC10225018A | <chem>CNc1nc(cc(n1)-c1ccc2c(N)n[nH]c2c1)N1C[C@H](CC[C@H]1C)C(=O)Nc1ccc1</chem> | 3  | CAMK2A  | CAMK2A  | > | 10000 |
| UNC10225018A | <chem>CNc1nc(cc(n1)-c1ccc2c(N)n[nH]c2c1)N1C[C@H](CC[C@H]1C)C(=O)Nc1ccc1</chem> | 3  | CAMK2B  | CAMK2B  | > | 10000 |
| UNC10225018A | <chem>CNc1nc(cc(n1)-c1ccc2c(N)n[nH]c2c1)N1C[C@H](CC[C@H]1C)C(=O)Nc1ccc1</chem> | 3  | CIT     | CIT     | = | 500   |
| UNC10225018A | <chem>CNc1nc(cc(n1)-c1ccc2c(N)n[nH]c2c1)N1C[C@H](CC[C@H]1C)C(=O)Nc1ccc1</chem> | 3  | DRAK1   | STK17A  | = | 89    |
| UNC10225018A | <chem>CNc1nc(cc(n1)-c1ccc2c(N)n[nH]c2c1)N1C[C@H](CC[C@H]1C)C(=O)Nc1ccc1</chem> | 3  | DRAK2   | STK17B  | = | 83    |
| UNC10225018A | <chem>CNc1nc(cc(n1)-c1ccc2c(N)n[nH]c2c1)N1C[C@H](CC[C@H]1C)C(=O)Nc1ccc1</chem> | 3  | GRK1    | GRK1    | > | 10000 |
| UNC10225018A | <chem>CNc1nc(cc(n1)-c1ccc2c(N)n[nH]c2c1)N1C[C@H](CC[C@H]1C)C(=O)Nc1ccc1</chem> | 3  | PDPK1   | PDPK1   | = | 1.7   |
| UNC10225018A | <chem>CNc1nc(cc(n1)-c1ccc2c(N)n[nH]c2c1)N1C[C@H](CC[C@H]1C)C(=O)Nc1ccc1</chem> | 3  | PRKX    | PRKX    | = | 65    |
| UNC10225018A | <chem>CNc1nc(cc(n1)-c1ccc2c(N)n[nH]c2c1)N1C[C@H](CC[C@H]1C)C(=O)Nc1ccc1</chem> | 3  | YANK2   | STK32B  | = | 220   |
| UNC10225019A | <chem>Cc1ccc(NC(=O)Nc2cccc(Cl)c2)cc1-c1ccc(cc1)C(=O)Nc1ccncc1</chem>           | 12 | BRSK1   | BRSK1   | > | 10000 |
| UNC10225019A | <chem>Cc1ccc(NC(=O)Nc2cccc(Cl)c2)cc1-c1ccc(cc1)C(=O)Nc1ccncc1</chem>           | 12 | CIT     | CIT     | = | 150   |
| UNC10225019A | <chem>Cc1ccc(NC(=O)Nc2cccc(Cl)c2)cc1-c1ccc(cc1)C(=O)Nc1ccncc1</chem>           | 12 | DDR1    | DDR1    | = | 76    |
| UNC10225019A | <chem>Cc1ccc(NC(=O)Nc2cccc(Cl)c2)cc1-c1ccc(cc1)C(=O)Nc1ccncc1</chem>           | 12 | IRAK3   | IRAK3   | > | 10000 |

|              |                                                        |    |             |          |   |       |
|--------------|--------------------------------------------------------|----|-------------|----------|---|-------|
| UNC10225019A | Cc1ccc(NC(=O)Nc2cccc(Cl)c2)cc1-c1ccc(cc1)C(=O)Nc1cncc1 | 12 | KIT         | KIT      | = | 180   |
| UNC10225019A | Cc1ccc(NC(=O)Nc2cccc(Cl)c2)cc1-c1ccc(cc1)C(=O)Nc1cncc1 | 12 | MEK1        | MAP2K1   | > | 10000 |
| UNC10225019A | Cc1ccc(NC(=O)Nc2cccc(Cl)c2)cc1-c1ccc(cc1)C(=O)Nc1cncc1 | 12 | MYO3A       | MYO3A    | > | 10000 |
| UNC10225019A | Cc1ccc(NC(=O)Nc2cccc(Cl)c2)cc1-c1ccc(cc1)C(=O)Nc1cncc1 | 12 | PDGFRB      | PDGFRB   | = | 50    |
| UNC10225019A | Cc1ccc(NC(=O)Nc2cccc(Cl)c2)cc1-c1ccc(cc1)C(=O)Nc1cncc1 | 12 | PRKX        | PRKX     | = | 7400  |
| UNC10225019A | Cc1ccc(NC(=O)Nc2cccc(Cl)c2)cc1-c1ccc(cc1)C(=O)Nc1cncc1 | 12 | RAF1        | RAF1     | = | 180   |
| UNC10225019A | Cc1ccc(NC(=O)Nc2cccc(Cl)c2)cc1-c1ccc(cc1)C(=O)Nc1cncc1 | 12 | YSK4        | MAP3K19  | = | 61    |
| UNC10225024A | FC(F)(F)c1cccc(Cn2ccn3c2nc(cc3=O)N2CCOCC2)c1           | 2  | PIK3CB      | PIK3CB   | = | 140   |
| UNC10225024A | FC(F)(F)c1cccc(Cn2ccn3c2nc(cc3=O)N2CCOCC2)c1           | 2  | VPS34       | PIK3C3   | = | 130   |
| UNC10225028A | Cc1ccc(s1)-c1nc(Nc2ccncc2)c2cccc2n1                    | 3  | CDK5        | CDK5     | > | 10000 |
| UNC10225028A | Cc1ccc(s1)-c1nc(Nc2ccncc2)c2cccc2n1                    | 3  | EPHA5       | EPHA5    | > | 10000 |
| UNC10225028A | Cc1ccc(s1)-c1nc(Nc2ccncc2)c2cccc2n1                    | 3  | ERK2        | MAPK1    | > | 10000 |
| UNC10225030A | CC(C)c1cc(nc(N)n1)-c1ccc2c(N)n[nH]c2c1                 | 1  | CHEK2       | CHEK2    | = | 320   |
| UNC10225030A | CC(C)c1cc(nc(N)n1)-c1ccc2c(N)n[nH]c2c1                 | 1  | DRAK1       | STK17A   | = | 29    |
| UNC10225030A | CC(C)c1cc(nc(N)n1)-c1ccc2c(N)n[nH]c2c1                 | 1  | HASPIN      | GS2      | = | 200   |
| UNC10225030A | CC(C)c1cc(nc(N)n1)-c1ccc2c(N)n[nH]c2c1                 | 1  | MKNK2       | MKNK2    | = | 160   |
| UNC10225030A | CC(C)c1cc(nc(N)n1)-c1ccc2c(N)n[nH]c2c1                 | 1  | RIOK1       | RIOK1    | = | 580   |
| UNC10225030A | CC(C)c1cc(nc(N)n1)-c1ccc2c(N)n[nH]c2c1                 | 1  | RIOK3       | RIOK3    | = | 440   |
| UNC10225031A | CNc1nccc(n1)-c1c(ncn1CCCN1CCOCC1)-c1ccc(F)cc1          | 3  | DMPK2       | CDC42BPG | > | 10000 |
| UNC10225031A | CNc1nccc(n1)-c1c(ncn1CCCN1CCOCC1)-c1ccc(F)cc1          | 3  | LIMK2       | LIMK2    | > | 10000 |
| UNC10225031A | CNc1nccc(n1)-c1c(ncn1CCCN1CCOCC1)-c1ccc(F)cc1          | 3  | NEK5        | NEK5     | > | 10000 |
| UNC10225031A | CNc1nccc(n1)-c1c(ncn1CCCN1CCOCC1)-c1ccc(F)cc1          | 3  | PAK2        | PAK2     | > | 10000 |
| UNC10225031A | CNc1nccc(n1)-c1c(ncn1CCCN1CCOCC1)-c1ccc(F)cc1          | 3  | PIM3        | PIM3     | > | 10000 |
| UNC10225031A | CNc1nccc(n1)-c1c(ncn1CCCN1CCOCC1)-c1ccc(F)cc1          | 3  | RSK4(Kin.Dc | RPS6KA6  | > | 10000 |
| UNC10225035A | Cn1cncc1-c1cc2c(Nc3ccc(OCc4cccc4)cc3)ncnc2cn1          | 12 | CDKL1       | CDKL1    | > | 10000 |
| UNC10225035A | Cn1cncc1-c1cc2c(Nc3ccc(OCc4cccc4)cc3)ncnc2cn1          | 12 | DRAK1       | STK17A   | > | 10000 |
| UNC10225035A | Cn1cncc1-c1cc2c(Nc3ccc(OCc4cccc4)cc3)ncnc2cn1          | 12 | EGFR        | EGFR     | = | 10    |
| UNC10225035A | Cn1cncc1-c1cc2c(Nc3ccc(OCc4cccc4)cc3)ncnc2cn1          | 12 | ERBB2       | ERBB2    | = | 17    |
| UNC10225035A | Cn1cncc1-c1cc2c(Nc3ccc(OCc4cccc4)cc3)ncnc2cn1          | 12 | MEK5        | MAP2K5   | = | 140   |
| UNC10225035A | Cn1cncc1-c1cc2c(Nc3ccc(OCc4cccc4)cc3)ncnc2cn1          | 12 | PRKG2       | PRKG2    | = | 3300  |
| UNC10225035A | Cn1cncc1-c1cc2c(Nc3ccc(OCc4cccc4)cc3)ncnc2cn1          | 12 | RIPK2       | RIPK2    | = | 65    |
| UNC10225035A | Cn1cncc1-c1cc2c(Nc3ccc(OCc4cccc4)cc3)ncnc2cn1          | 12 | ROCK1       | ROCK1    | = | 590   |
| UNC10225035A | Cn1cncc1-c1cc2c(Nc3ccc(OCc4cccc4)cc3)ncnc2cn1          | 12 | TYK2(JH1do  | TYK2     | > | 10000 |
| UNC10225037A | C1COc2cc(Nc3nccc(n3)-c3cnn4nc(ccc34)-c3cccc3)ccc2O1    | 4  | CSK         | CSK      | > | 10000 |
| UNC10225037A | C1COc2cc(Nc3nccc(n3)-c3cnn4nc(ccc34)-c3cccc3)ccc2O1    | 4  | ERK8        | MAPK15   | = | 670   |
| UNC10225037A | C1COc2cc(Nc3nccc(n3)-c3cnn4nc(ccc34)-c3cccc3)ccc2O1    | 4  | MAK         | MAK      | > | 10000 |
| UNC10225037A | C1COc2cc(Nc3nccc(n3)-c3cnn4nc(ccc34)-c3cccc3)ccc2O1    | 4  | MET         | MET      | > | 10000 |
| UNC10225037A | C1COc2cc(Nc3nccc(n3)-c3cnn4nc(ccc34)-c3cccc3)ccc2O1    | 4  | PAK6        | PAK6     | > | 10000 |
| UNC10225037A | C1COc2cc(Nc3nccc(n3)-c3cnn4nc(ccc34)-c3cccc3)ccc2O1    | 4  | STK16       | STK16    | = | 620   |
| UNC10225042A | COc1ccc2nc(nc(Nc3ccncc3)c2c1)-c1cccc(C)n1              | 6  | ACVR1B      | ACVR1B   | = | 150   |
| UNC10225042A | COc1ccc2nc(nc(Nc3ccncc3)c2c1)-c1cccc(C)n1              | 6  | DMPK2       | CDC42BPG | = | 510   |
| UNC10225042A | COc1ccc2nc(nc(Nc3ccncc3)c2c1)-c1cccc(C)n1              | 6  | JAK1(JH2do  | JAK1     | = | 260   |

|              |                                                                 |              |          |   |       |
|--------------|-----------------------------------------------------------------|--------------|----------|---|-------|
| UNC10225042A | COc1ccc2nc(nc(Nc3ccncc3)c2c1)-c1cccc(C)n1                       | 6 MRCKB      | CDC42BPB | = | 520   |
| UNC10225042A | COc1ccc2nc(nc(Nc3ccncc3)c2c1)-c1cccc(C)n1                       | 6 PIKFYVE    | PIKFYVE  | = | 1200  |
| UNC10225042A | COc1ccc2nc(nc(Nc3ccncc3)c2c1)-c1cccc(C)n1                       | 6 PRKD1      | PRKD1    | = | 51    |
| UNC10225042A | COc1ccc2nc(nc(Nc3ccncc3)c2c1)-c1cccc(C)n1                       | 6 PRKD2      | PRKD2    | = | 34    |
| UNC10225042A | COc1ccc2nc(nc(Nc3ccncc3)c2c1)-c1cccc(C)n1                       | 6 PRKD3      | PRKD3    | = | 490   |
| UNC10225042A | COc1ccc2nc(nc(Nc3ccncc3)c2c1)-c1cccc(C)n1                       | 6 TGFBR1     | TGFBR1   | = | 170   |
| UNC10225042A | COc1ccc2nc(nc(Nc3ccncc3)c2c1)-c1cccc(C)n1                       | 6 TYK2(JH2do | TYK2     | = | 2000  |
| UNC10225044A | Cc1cccc(n1)-c1nc(Nc2cccc(c2)C(N)=O)c2cccc2n1                    | 1 ACVR1B     | ACVR1B   | = | 1600  |
| UNC10225044A | Cc1cccc(n1)-c1nc(Nc2cccc(c2)C(N)=O)c2cccc2n1                    | 1 MEK1       | MAP2K1   | > | 10000 |
| UNC10225044A | Cc1cccc(n1)-c1nc(Nc2cccc(c2)C(N)=O)c2cccc2n1                    | 1 PRKD3      | PRKD3    | = | 820   |
| UNC10225050A | Brc1cc2c(NC(=O)C3CCCC3)n[nH]c2nc1-c1nccs1                       | 5 BRSK1      | BRSK1    | = | 430   |
| UNC10225050A | Brc1cc2c(NC(=O)C3CCCC3)n[nH]c2nc1-c1nccs1                       | 5 BRSK2      | BRSK2    | = | 330   |
| UNC10225050A | Brc1cc2c(NC(=O)C3CCCC3)n[nH]c2nc1-c1nccs1                       | 5 CDC2L1     | CDK11B   | > | 10000 |
| UNC10225050A | Brc1cc2c(NC(=O)C3CCCC3)n[nH]c2nc1-c1nccs1                       | 5 CDK2       | CDK2     | = | 280   |
| UNC10225050A | Brc1cc2c(NC(=O)C3CCCC3)n[nH]c2nc1-c1nccs1                       | 5 CDK4       | CDK4     | = | 4200  |
| UNC10225050A | Brc1cc2c(NC(=O)C3CCCC3)n[nH]c2nc1-c1nccs1                       | 5 CDK9       | CDK9     | = | 2500  |
| UNC10225050A | Brc1cc2c(NC(=O)C3CCCC3)n[nH]c2nc1-c1nccs1                       | 5 CDKL2      | CDKL2    | = | 500   |
| UNC10225050A | Brc1cc2c(NC(=O)C3CCCC3)n[nH]c2nc1-c1nccs1                       | 5 ERK4       | MAPK4    | > | 10000 |
| UNC10225050A | Brc1cc2c(NC(=O)C3CCCC3)n[nH]c2nc1-c1nccs1                       | 5 GSK3A      | GSK3A    | = | 61    |
| UNC10225050A | Brc1cc2c(NC(=O)C3CCCC3)n[nH]c2nc1-c1nccs1                       | 5 ICK        | ICK      | = | 220   |
| UNC10225050A | Brc1cc2c(NC(=O)C3CCCC3)n[nH]c2nc1-c1nccs1                       | 5 MYLK2      | MYLK2    | = | 130   |
| UNC10225052A | COc1cc(Nc2nccc(n2)N2CCC(C2)NC(=O)C2COc3cccc3O2)c<br>c(OC)c1OC   | 5 EPHB6      | EPHB6    | = | 110   |
| UNC10225052A | COc1cc(Nc2nccc(n2)N2CCC(C2)NC(=O)C2COc3cccc3O2)c<br>c(OC)c1OC   | 5 JAK2(JH1do | JAK2     | = | 47    |
| UNC10225052A | COc1cc(Nc2nccc(n2)N2CCC(C2)NC(=O)C2COc3cccc3O2)c<br>c(OC)c1OC   | 5 MEK5       | MAP2K5   | = | 180   |
| UNC10225052A | COc1cc(Nc2nccc(n2)N2CCC(C2)NC(=O)C2COc3cccc3O2)c<br>c(OC)c1OC   | 5 NEK5       | NEK5     | = | 370   |
| UNC10225052A | COc1cc(Nc2nccc(n2)N2CCC(C2)NC(=O)C2COc3cccc3O2)c<br>c(OC)c1OC   | 5 PIP5K2C    | PIP4K2C  | = | 670   |
| UNC10225052A | COc1cc(Nc2nccc(n2)N2CCC(C2)NC(=O)C2COc3cccc3O2)c<br>c(OC)c1OC   | 5 TYK2(JH1do | TYK2     | = | 1500  |
| UNC10225056A | COc1ccc(Nc2nccc(n2)-<br>c2cccc(NC(=O)c3cc4cc(F)ccc4[nH]3)c2)cc1 | 5 ABL1-nonpf | ABL1     | = | 100   |
| UNC10225056A | COc1ccc(Nc2nccc(n2)-<br>c2cccc(NC(=O)c3cc4cc(F)ccc4[nH]3)c2)cc1 | 5 MEK5       | MAP2K5   | = | 200   |
| UNC10225056A | COc1ccc(Nc2nccc(n2)-<br>c2cccc(NC(=O)c3cc4cc(F)ccc4[nH]3)c2)cc1 | 5 PIP5K2C    | PIP4K2C  | = | 1400  |
| UNC10225056A | COc1ccc(Nc2nccc(n2)-<br>c2cccc(NC(=O)c3cc4cc(F)ccc4[nH]3)c2)cc1 | 5 TNIK       | TNIK     | = | 820   |
| UNC10225057A | Clc1ccc(cc1)-c1cc(ccn1)-c1c[nH]nc1-c1ccccn1                     | 2 DLK        | MAP3K12  | > | 10000 |
| UNC10225057A | Clc1ccc(cc1)-c1cc(ccn1)-c1c[nH]nc1-c1ccccn1                     | 2 TGFBR2     | TGFBR2   | = | 530   |
| UNC10225057A | Clc1ccc(cc1)-c1cc(ccn1)-c1c[nH]nc1-c1ccccn1                     | 2 TNIK       | TNIK     | = | 390   |
| UNC10225057A | Clc1ccc(cc1)-c1cc(ccn1)-c1c[nH]nc1-c1ccccn1                     | 2 TRKC       | NTRK3    | > | 10000 |
| UNC10225058A | Nc1nccc(n1)-c1c(ncn1C1CCN(Cc2cccc2)CC1)-c1ccc(F)cc1             | 9 CIT        | CIT      | = | 130   |
| UNC10225058A | Nc1nccc(n1)-c1c(ncn1C1CCN(Cc2cccc2)CC1)-c1ccc(F)cc1             | 9 CSNK1A1    | CSNK1A1  | = | 41    |
| UNC10225058A | Nc1nccc(n1)-c1c(ncn1C1CCN(Cc2cccc2)CC1)-c1ccc(F)cc1             | 9 CSNK1D     | CSNK1D   | = | 7.5   |
| UNC10225058A | Nc1nccc(n1)-c1c(ncn1C1CCN(Cc2cccc2)CC1)-c1ccc(F)cc1             | 9 CSNK1E     | CSNK1E   | = | 24    |
| UNC10225058A | Nc1nccc(n1)-c1c(ncn1C1CCN(Cc2cccc2)CC1)-c1ccc(F)cc1             | 9 DDR1       | DDR1     | = | 140   |

|              |                                                              |   |              |          |   |       |
|--------------|--------------------------------------------------------------|---|--------------|----------|---|-------|
| UNC10225058A | Nc1nccc(n1)-c1c(ncn1C1CCN(Cc2ccccc2)CC1)-c1ccc(F)cc1         | 9 | JNK2         | MAPK9    | = | 43    |
| UNC10225058A | Nc1nccc(n1)-c1c(ncn1C1CCN(Cc2ccccc2)CC1)-c1ccc(F)cc1         | 9 | JNK3         | MAPK10   | = | 31    |
| UNC10225058A | Nc1nccc(n1)-c1c(ncn1C1CCN(Cc2ccccc2)CC1)-c1ccc(F)cc1         | 9 | NLK          | NLK      | = | 140   |
| UNC10225058A | Nc1nccc(n1)-c1c(ncn1C1CCN(Cc2ccccc2)CC1)-c1ccc(F)cc1         | 9 | p38-alpha    | MAPK14   | = | 46    |
| UNC10225058A | Nc1nccc(n1)-c1c(ncn1C1CCN(Cc2ccccc2)CC1)-c1ccc(F)cc1         | 9 | PIP5K2C      | PIP4K2C  | = | 93    |
| UNC10225058A | Nc1nccc(n1)-c1c(ncn1C1CCN(Cc2ccccc2)CC1)-c1ccc(F)cc1         | 9 | TNIK         | TNIK     | = | 4100  |
| UNC10225060A | CC(=O)Nc1n[nH]c2ncc(cc12)-c1ccccc1                           | 4 | DAPK1        | DAPK1    | > | 10000 |
| UNC10225060A | CC(=O)Nc1n[nH]c2ncc(cc12)-c1ccccc1                           | 4 | JAK1(JH2do   | JAK1     | = | 380   |
| UNC10225060A | CC(=O)Nc1n[nH]c2ncc(cc12)-c1ccccc1                           | 4 | MEK5         | MAP2K5   | = | 290   |
| UNC10225060A | CC(=O)Nc1n[nH]c2ncc(cc12)-c1ccccc1                           | 4 | NIM1         | MGC42105 | > | 10000 |
| UNC10225060A | CC(=O)Nc1n[nH]c2ncc(cc12)-c1ccccc1                           | 4 | PDGFRB       | PDGFRB   | = | 270   |
| UNC10225060A | CC(=O)Nc1n[nH]c2ncc(cc12)-c1ccccc1                           | 4 | RSK1(Kin.Dc  | RPS6KA1  | > | 10000 |
| UNC10225060A | CC(=O)Nc1n[nH]c2ncc(cc12)-c1ccccc1                           | 4 | TRKA         | NTRK1    | = | 2500  |
| UNC10225060A | CC(=O)Nc1n[nH]c2ncc(cc12)-c1ccccc1                           | 4 | TYK2(JH2do   | TYK2     | = | 580   |
| UNC10225061A | COc1cccc(c1)C1=C(Nc2cccc(c2)C(O)=O)C(=O)NC1=O                | 2 | JAK3(JH1do   | JAK3     | = | 480   |
| UNC10225061A | COc1cccc(c1)C1=C(Nc2cccc(c2)C(O)=O)C(=O)NC1=O                | 2 | PRKCI        | PRKCI    | > | 10000 |
| UNC10225063A | OC(=O)c1cc(NC2=C(C(=O)NC2=O)c2ccccc2)ccc1Cl                  | 0 | NEK10        | NEK10    | = | 460   |
| UNC10225065A | Oc1cccc(NC2=C(C(=O)NC2=O)c2ccccc2)c1                         | 3 | NIM1         | MGC42105 | > | 10000 |
| UNC10225065A | Oc1cccc(NC2=C(C(=O)NC2=O)c2ccccc2)c1                         | 3 | PRKR         | EIF2AK2  | > | 10000 |
| UNC10225065A | Oc1cccc(NC2=C(C(=O)NC2=O)c2ccccc2)c1                         | 3 | TLK2         | TLK2     | = | 2400  |
| UNC10225069A | COc1cc2nncn(-c3cc(OCc4ccncc4)c(s3)C(N)=O)c2cc1OC             | 4 | INSRR        | INSRR    | > | 10000 |
| UNC10225069A | COc1cc2nncn(-c3cc(OCc4ccncc4)c(s3)C(N)=O)c2cc1OC             | 4 | MEK5         | MAP2K5   | = | 670   |
| UNC10225069A | COc1cc2nncn(-c3cc(OCc4ccncc4)c(s3)C(N)=O)c2cc1OC             | 4 | MUSK         | MUSK     | > | 10000 |
| UNC10225069A | COc1cc2nncn(-c3cc(OCc4ccncc4)c(s3)C(N)=O)c2cc1OC             | 4 | PLK1         | PLK1     | = | 110   |
| UNC10225069A | COc1cc2nncn(-c3cc(OCc4ccncc4)c(s3)C(N)=O)c2cc1OC             | 4 | PLK2         | PLK2     | = | 41    |
| UNC10225069A | COc1cc2nncn(-c3cc(OCc4ccncc4)c(s3)C(N)=O)c2cc1OC             | 4 | TIE1         | TIE1     | > | 10000 |
| UNC10225070A | Nc1n[nH]c2cc(ccc12)-c1cccc(N)n1                              | 2 | CDK7         | CDK7     | > | 10000 |
| UNC10225070A | Nc1n[nH]c2cc(ccc12)-c1cccc(N)n1                              | 2 | JAK2(JH1do   | JAK2     | > | 10000 |
| UNC10225070A | Nc1n[nH]c2cc(ccc12)-c1cccc(N)n1                              | 2 | MYLK2        | MYLK2    | = | 180   |
| UNC10225070A | Nc1n[nH]c2cc(ccc12)-c1cccc(N)n1                              | 2 | RIOK1        | RIOK1    | = | 390   |
| UNC10225070A | Nc1n[nH]c2cc(ccc12)-c1cccc(N)n1                              | 2 | RIOK3        | RIOK3    | = | 490   |
| UNC10225070A | Nc1n[nH]c2cc(ccc12)-c1cccc(N)n1                              | 2 | YSK4         | MAP3K19  | = | 130   |
| UNC10225072A | N#Cc1ccc(cc1)-c1cc(ccn1)-c1c[nH]nc1-c1ccccc1                 | 0 | TGFBR1       | TGFBR1   | = | 150   |
| UNC10225072A | N#Cc1ccc(cc1)-c1cc(ccn1)-c1c[nH]nc1-c1ccccc1                 | 0 | TGFBR2       | TGFBR2   | = | 580   |
| UNC10225073A | Fc1ccc(Nc2nccc(n2)-c2c(nn3ncccc23)-c2ccc(Cl)cc2)cc1F         | 1 | DDR1         | DDR1     | = | 750   |
| UNC10225073A | Fc1ccc(Nc2nccc(n2)-c2c(nn3ncccc23)-c2ccc(Cl)cc2)cc1F         | 1 | TNIK         | TNIK     | > | 10000 |
| UNC10225073A | Fc1ccc(Nc2nccc(n2)-c2c(nn3ncccc23)-c2ccc(Cl)cc2)cc1F         | 1 | ULK2         | ULK2     | > | 10000 |
| UNC10225075A | CN(C)c1cc(nc(N)n1)-c1ccc2c(N)n[nH]c2c1                       | 2 | KIT-autoinhi | KIT      | > | 10000 |
| UNC10225075A | CN(C)c1cc(nc(N)n1)-c1ccc2c(N)n[nH]c2c1                       | 2 | TXK          | TXK      | > | 10000 |
| UNC10225075A | CN(C)c1cc(nc(N)n1)-c1ccc2c(N)n[nH]c2c1                       | 2 | ZAK          | ZAK      | > | 10000 |
| UNC10225080A | COc1cc(Nc2nccc(n2)N2CCC(C2)NC(=O)C(C)c2ccc(Cl)cc2)cc(OC)c1OC | 2 | EPHB6        | EPHB6    | = | 100   |
| UNC10225080A | COc1cc(Nc2nccc(n2)N2CCC(C2)NC(=O)C(C)c2ccc(Cl)cc2)cc(OC)c1OC | 2 | JAK2(JH1do   | JAK2     | = | 140   |
| UNC10225080A | COc1cc(Nc2nccc(n2)N2CCC(C2)NC(=O)C(C)c2ccc(Cl)cc2)cc(OC)c1OC | 2 | NEK5         | NEK5     | = | 740   |
| UNC10225083A | C[C@@H]1CCCCN1c1cc(nc(N)n1)-c1ccc2c(N)n[nH]c2c1              | 1 | AURKA        | AURKA    | > | 10000 |
| UNC10225083A | C[C@@H]1CCCCN1c1cc(nc(N)n1)-c1ccc2c(N)n[nH]c2c1              | 1 | DRAK1        | STK17A   | = | 88    |
| UNC10225083A | C[C@@H]1CCCCN1c1cc(nc(N)n1)-c1ccc2c(N)n[nH]c2c1              | 1 | p38-alpha    | MAPK14   | = | 2100  |

|              |                                                     |    |             |          |   |       |
|--------------|-----------------------------------------------------|----|-------------|----------|---|-------|
| UNC10225085A | Cl.C(c1cccc1)n1ncc2cc(Nc3ncnc4cccc34)ccc12          | 9  | EGFR        | EGFR     | = | 7.6   |
| UNC10225085A | Cl.C(c1cccc1)n1ncc2cc(Nc3ncnc4cccc34)ccc12          | 9  | ERBB2       | ERBB2    | = | 11    |
| UNC10225085A | Cl.C(c1cccc1)n1ncc2cc(Nc3ncnc4cccc34)ccc12          | 9  | ERBB4       | ERBB4    | = | 61    |
| UNC10225085A | Cl.C(c1cccc1)n1ncc2cc(Nc3ncnc4cccc34)ccc12          | 9  | MEK5        | MAP2K5   | = | 90    |
| UNC10225086A | Fc1ccc(Nc2nccc(NCCNC(=O)c3cc4cccc4s3)n2)cc1         | 3  | TESK1       | TESK1    | > | 10000 |
| UNC10225086A | Fc1ccc(Nc2nccc(NCCNC(=O)c3cc4cccc4s3)n2)cc1         | 3  | TXK         | TXK      | > | 10000 |
| UNC10225086A | Fc1ccc(Nc2nccc(NCCNC(=O)c3cc4cccc4s3)n2)cc1         | 3  | ZAK         | ZAK      | > | 10000 |
| UNC10225087A | CN(C1=C(C(=O)NC1=O)c1cccc1)c1cccc1                  | 0  | TXK         | TXK      | > | 10000 |
| UNC10225088A | CC(=O)c1cccc(NC(=O)NC2CCN(C2)c2ccnc(Nc3ccc(F)cc3)n2 | 0  | CDK11       | CDK19    | = | 2000  |
| UNC10225088A | )c1                                                 |    |             |          |   |       |
| UNC10225088A | CC(=O)c1cccc(NC(=O)NC2CCN(C2)c2ccnc(Nc3ccc(F)cc3)n2 | 0  | TRKC        | NTRK3    | = | 94    |
| UNC10225088A | )c1                                                 |    |             |          |   |       |
| UNC10225090A | Oc1ccc(NC2=C(C(=O)NC2=O)c2ccc(Cl)cc2)cc1            | 3  | CAMK1       | CAMK1    | > | 10000 |
| UNC10225090A | Oc1ccc(NC2=C(C(=O)NC2=O)c2ccc(Cl)cc2)cc1            | 3  | CAMK1D      | CAMK1D   | > | 10000 |
| UNC10225090A | Oc1ccc(NC2=C(C(=O)NC2=O)c2ccc(Cl)cc2)cc1            | 3  | TTK         | TTK      | = | 5500  |
| UNC10225091A | Cl.CS(=O)(=O)CCNCc1nc(cs1)-                         | 14 | EGFR        | EGFR     | = | 0.69  |
| UNC10225091A | c1ccc2ncnc(Nc3ccc(OCc4cccc(F)c4)c(Cl)c3)c2c1        |    |             |          |   |       |
| UNC10225091A | Cl.CS(=O)(=O)CCNCc1nc(cs1)-                         | 14 | ERBB2       | ERBB2    | = | 5.9   |
| UNC10225091A | c1ccc2ncnc(Nc3ccc(OCc4cccc(F)c4)c(Cl)c3)c2c1        |    |             |          |   |       |
| UNC10225091A | Cl.CS(=O)(=O)CCNCc1nc(cs1)-                         | 14 | ERBB4       | ERBB4    | = | 26    |
| UNC10225091A | c1ccc2ncnc(Nc3ccc(OCc4cccc(F)c4)c(Cl)c3)c2c1        |    |             |          |   |       |
| UNC10225091A | Cl.CS(=O)(=O)CCNCc1nc(cs1)-                         | 14 | TESK1       | TESK1    | > | 10000 |
| UNC10225091A | c1ccc2ncnc(Nc3ccc(OCc4cccc(F)c4)c(Cl)c3)c2c1        |    |             |          |   |       |
| UNC10225091A | Cl.CS(=O)(=O)CCNCc1nc(cs1)-                         | 14 | TXK         | TXK      | > | 10000 |
| UNC10225091A | c1ccc2ncnc(Nc3ccc(OCc4cccc(F)c4)c(Cl)c3)c2c1        |    |             |          |   |       |
| UNC10225091A | Cl.CS(=O)(=O)CCNCc1nc(cs1)-                         | 14 | ZAK         | ZAK      | > | 10000 |
| UNC10225093A | COc1ccc(Nc2nccc(n2)N2CCC(C2)NC(=O)c2cc3cccc3s2)cc   | 3  | CHEK1       | CHEK1    | > | 10000 |
| UNC10225093A | 1                                                   |    |             |          |   |       |
| UNC10225093A | COc1ccc(Nc2nccc(n2)N2CCC(C2)NC(=O)c2cc3cccc3s2)cc   | 3  | DDR1        | DDR1     | > | 10000 |
| UNC10225093A | 1                                                   |    |             |          |   |       |
| UNC10225093A | COc1ccc(Nc2nccc(n2)N2CCC(C2)NC(=O)c2cc3cccc3s2)cc   | 3  | JAK2(JH1do  | JAK2     | = | 1800  |
| UNC10225093A | 1                                                   |    |             |          |   |       |
| UNC10225093A | COc1ccc(Nc2nccc(n2)N2CCC(C2)NC(=O)c2cc3cccc3s2)cc   | 3  | MAK         | MAK      | > | 10000 |
| UNC10225093A | 1                                                   |    |             |          |   |       |
| UNC10225093A | COc1ccc(Nc2nccc(n2)N2CCC(C2)NC(=O)c2cc3cccc3s2)cc   | 3  | PRKD3       | PRKD3    | > | 10000 |
| UNC10225093A | 1                                                   |    |             |          |   |       |
| UNC10225095A | CCn1c(nc2cnccc12)-c1c(C)onc1N                       | 7  | CDC2L5      | CDK13    | > | 10000 |
| UNC10225095A | CCn1c(nc2cnccc12)-c1c(C)onc1N                       | 7  | DMPK2       | CDC42BPG | > | 10000 |
| UNC10225095A | CCn1c(nc2cnccc12)-c1c(C)onc1N                       | 7  | ERK3        | MAPK6    | > | 10000 |
| UNC10225095A | CCn1c(nc2cnccc12)-c1c(C)onc1N                       | 7  | LIMK2       | LIMK2    | > | 10000 |
| UNC10225095A | CCn1c(nc2cnccc12)-c1c(C)onc1N                       | 7  | PIK3CB      | PIK3CB   | > | 10000 |
| UNC10225097A | Cc1cccc2c(c(nn12)-c1ccc(F)cc1)-c1ccncn1             | 6  | CIT         | CIT      | = | 2500  |
| UNC10225097A | Cc1cccc2c(c(nn12)-c1ccc(F)cc1)-c1ccncn1             | 6  | CLK1        | CLK1     | > | 10000 |
| UNC10225097A | Cc1cccc2c(c(nn12)-c1ccc(F)cc1)-c1ccncn1             | 6  | CLK3        | CLK3     | > | 10000 |
| UNC10225097A | Cc1cccc2c(c(nn12)-c1ccc(F)cc1)-c1ccncn1             | 6  | CSNK1D      | CSNK1D   | = | 1200  |
| UNC10225097A | Cc1cccc2c(c(nn12)-c1ccc(F)cc1)-c1ccncn1             | 6  | CSNK1E      | CSNK1E   | = | 3400  |
| UNC10225097A | Cc1cccc2c(c(nn12)-c1ccc(F)cc1)-c1ccncn1             | 6  | CSNK1G3     | CSNK1G3  | > | 10000 |
| UNC10225097A | Cc1cccc2c(c(nn12)-c1ccc(F)cc1)-c1ccncn1             | 6  | ERK8        | MAPK15   | > | 10000 |
| UNC10225097A | Cc1cccc2c(c(nn12)-c1ccc(F)cc1)-c1ccncn1             | 6  | p38-alpha   | MAPK14   | = | 1300  |
| UNC10225097A | Cc1cccc2c(c(nn12)-c1ccc(F)cc1)-c1ccncn1             | 6  | RSK4(Kin.Dc | RPS6KA6  | = | 6800  |
| UNC10225099A | Cl.Cc1c(O)cccc1Nc1ccnc2ccc(cc12)C(F)(F)F            | 3  | ACVR2B      | ACVR2B   | = | 240   |
| UNC10225099A | Cl.Cc1c(O)cccc1Nc1ccnc2ccc(cc12)C(F)(F)F            | 3  | ADCK4       | ADCK4    | = | 510   |
| UNC10225099A | Cl.Cc1c(O)cccc1Nc1ccnc2ccc(cc12)C(F)(F)F            | 3  | BRK         | PTK6     | = | 190   |
| UNC10225099A | Cl.Cc1c(O)cccc1Nc1ccnc2ccc(cc12)C(F)(F)F            | 3  | HUNK        | HUNK     | > | 10000 |

|              |                                                                         |                |          |   |       |
|--------------|-------------------------------------------------------------------------|----------------|----------|---|-------|
| UNC10225101A | Fc1cccc(COc2ccc(Nc3ncnc4sc(cc34)-c3ccc[nH]3)cc2Cl)c1                    | 15 CLK4        | CLK4     | > | 10000 |
| UNC10225101A | Fc1cccc(COc2ccc(Nc3ncnc4sc(cc34)-c3ccc[nH]3)cc2Cl)c1                    | 15 EGFR        | EGFR     | = | 2.6   |
| UNC10225101A | Fc1cccc(COc2ccc(Nc3ncnc4sc(cc34)-c3ccc[nH]3)cc2Cl)c1                    | 15 ERBB2       | ERBB2    | = | 100   |
| UNC10225101A | Fc1cccc(COc2ccc(Nc3ncnc4sc(cc34)-c3ccc[nH]3)cc2Cl)c1                    | 15 ERBB4       | ERBB4    | = | 560   |
| UNC10225101A | Fc1cccc(COc2ccc(Nc3ncnc4sc(cc34)-c3ccc[nH]3)cc2Cl)c1                    | 15 JAK2(JH1do  | JAK2     | > | 10000 |
| UNC10225101A | Fc1cccc(COc2ccc(Nc3ncnc4sc(cc34)-c3ccc[nH]3)cc2Cl)c1                    | 15 LZK         | MAP3K13  | > | 10000 |
| UNC10225101A | Fc1cccc(COc2ccc(Nc3ncnc4sc(cc34)-c3ccc[nH]3)cc2Cl)c1                    | 15 PRKCH       | PRKCH    | > | 10000 |
| UNC10225101A | Fc1cccc(COc2ccc(Nc3ncnc4sc(cc34)-c3ccc[nH]3)cc2Cl)c1                    | 15 RPS6KA5(Kii | RPS6KA5  | > | 10000 |
| UNC10225105A | COc1cc(Nc2nccc(n2)N2CCC(C2)NC(=O)Nc2cc(C)ccc2C)cc(OC)c1OC               | 8 AURKA        | AURKA    | = | 1100  |
| UNC10225105A | COc1cc(Nc2nccc(n2)N2CCC(C2)NC(=O)Nc2cc(C)ccc2C)cc(OC)c1OC               | 8 AURKB        | AURKB    | = | 240   |
| UNC10225105A | COc1cc(Nc2nccc(n2)N2CCC(C2)NC(=O)Nc2cc(C)ccc2C)cc(OC)c1OC               | 8 AURKC        | AURKC    | = | 200   |
| UNC10225105A | COc1cc(Nc2nccc(n2)N2CCC(C2)NC(=O)Nc2cc(C)ccc2C)cc(OC)c1OC               | 8 EPHB6        | EPHB6    | = | 1100  |
| UNC10225105A | COc1cc(Nc2nccc(n2)N2CCC(C2)NC(=O)Nc2cc(C)ccc2C)cc(OC)c1OC               | 8 MEK5         | MAP2K5   | = | 53    |
| UNC10225105A | COc1cc(Nc2nccc(n2)N2CCC(C2)NC(=O)Nc2cc(C)ccc2C)cc(OC)c1OC               | 8 NEK5         | NEK5     | = | 2300  |
| UNC10225105A | COc1cc(Nc2nccc(n2)N2CCC(C2)NC(=O)Nc2cc(C)ccc2C)cc(OC)c1OC               | 8 ULK3         | ULK3     | = | 4300  |
| UNC10225109A | COc1cc(Nc2ccnc3ccc(cc23)C(F)(F)F)cc(OC)c1OC                             | 2 ADCK3        | CABC1    | = | 220   |
| UNC10225109A | COc1cc(Nc2ccnc3ccc(cc23)C(F)(F)F)cc(OC)c1OC                             | 2 GAK          | GAK      | = | 31    |
| UNC10225109A | COc1cc(Nc2ccnc3ccc(cc23)C(F)(F)F)cc(OC)c1OC                             | 2 JAK3(JH1do   | JAK3     | > | 10000 |
| UNC10225109A | COc1cc(Nc2ccnc3ccc(cc23)C(F)(F)F)cc(OC)c1OC                             | 2 NIM1         | MGC42105 | > | 10000 |
| UNC10225109A | COc1cc(Nc2ccnc3ccc(cc23)C(F)(F)F)cc(OC)c1OC                             | 2 RSK2(Kin.Dc  | RPS6KA3  | > | 10000 |
| UNC10225110A | COc1cccc(NC(=O)NC2CCN(C2)c2ccnc(Nc3ccc(F)cc3)n2)c1                      | 2 ACVR2A       | ACVR2A   | > | 10000 |
| UNC10225110A | COc1cccc(NC(=O)NC2CCN(C2)c2ccnc(Nc3ccc(F)cc3)n2)c1                      | 2 MAP4K4       | MAP4K4   | > | 10000 |
| UNC10225110A | COc1cccc(NC(=O)NC2CCN(C2)c2ccnc(Nc3ccc(F)cc3)n2)c1                      | 2 MAP4K5       | MAP4K5   | > | 10000 |
| UNC10225110A | COc1cccc(NC(=O)NC2CCN(C2)c2ccnc(Nc3ccc(F)cc3)n2)c1                      | 2 MEK5         | MAP2K5   | = | 500   |
| UNC10225110A | COc1cccc(NC(=O)NC2CCN(C2)c2ccnc(Nc3ccc(F)cc3)n2)c1                      | 2 TRKC         | NTRK3    | = | 310   |
| UNC10225112A | COc1cccc(NC(=O)NC2CCN(C2)c2ccnc(Nc3ccc(F)cc3)n2)c1                      | 0 MINK         | MINK1    | > | 10000 |
| UNC10225112A | COc1cccc(NC(=O)NC2CCN(C2)c2ccnc(Nc3ccc(F)cc3)n2)c1                      | 0 SRPK2        | SRPK2    | > | 10000 |
| UNC10225113A | CCCc1ccc(cc1)S(=O)(=O)NC1CCN(C1)c1ccnc(Nc2ccc(OC)cc2)n1                 | 7 DMPK2        | CDC42BPG | > | 10000 |
| UNC10225113A | CCCc1ccc(cc1)S(=O)(=O)NC1CCN(C1)c1ccnc(Nc2ccc(OC)cc2)n1                 | 7 LIMK2        | LIMK2    | > | 10000 |
| UNC10225113A | CCCc1ccc(cc1)S(=O)(=O)NC1CCN(C1)c1ccnc(Nc2ccc(OC)cc2)n1                 | 7 LTK          | LTK      | = | 8700  |
| UNC10225113A | CCCc1ccc(cc1)S(=O)(=O)NC1CCN(C1)c1ccnc(Nc2ccc(OC)cc2)n1                 | 7 OSR1         | OXR1     | > | 10000 |
| UNC10225113A | CCCc1ccc(cc1)S(=O)(=O)NC1CCN(C1)c1ccnc(Nc2ccc(OC)cc2)n1                 | 7 PAK3         | PAK3     | > | 10000 |
| UNC10225113A | CCCc1ccc(cc1)S(=O)(=O)NC1CCN(C1)c1ccnc(Nc2ccc(OC)cc2)n1                 | 7 SBK1         | SBK1     | > | 10000 |
| UNC10225113A | CCCc1ccc(cc1)S(=O)(=O)NC1CCN(C1)c1ccnc(Nc2ccc(OC)cc2)n1                 | 7 ULK1         | ULK1     | > | 10000 |
| UNC10225114A | CCn1c(nc2cnccc12)-c1ccnc1O                                              | 0 ADCK4        | ADCK4    | > | 10000 |
| UNC10225114A | CCn1c(nc2cnccc12)-c1ccnc1O                                              | 0 CSNK1A1L     | CSNK1A1L | > | 10000 |
| UNC10225114A | CCn1c(nc2cnccc12)-c1ccnc1O                                              | 0 WEE2         | WEE2     | > | 10000 |
| UNC10225115A | Cl.Cl.CS(=O)(=O)CCNCc1nc(cs1)-c1ccc2ncnc(Nc3ccc4n(Cc5ccccc5)ncc4c3)c2c1 | 15 CDKL3       | CDKL3    | > | 10000 |

|              |                                                                             |    |             |          |   |       |
|--------------|-----------------------------------------------------------------------------|----|-------------|----------|---|-------|
| UNC10225115A | Cl.Cl.CS(=O)(=O)CCNCc1nc(cs1)-<br>c1ccc2ncnc(Nc3ccc4n(Cc5ccccc5)ncc4c3)c2c1 | 15 | EGFR        | EGFR     | = | 0.8   |
| UNC10225115A | Cl.Cl.CS(=O)(=O)CCNCc1nc(cs1)-<br>c1ccc2ncnc(Nc3ccc4n(Cc5ccccc5)ncc4c3)c2c1 | 15 | ERBB2       | ERBB2    | = | 1.1   |
| UNC10225115A | Cl.Cl.CS(=O)(=O)CCNCc1nc(cs1)-<br>c1ccc2ncnc(Nc3ccc4n(Cc5ccccc5)ncc4c3)c2c1 | 15 | ERBB3       | ERBB3    | = | 69    |
| UNC10225115A | Cl.Cl.CS(=O)(=O)CCNCc1nc(cs1)-<br>c1ccc2ncnc(Nc3ccc4n(Cc5ccccc5)ncc4c3)c2c1 | 15 | ERBB4       | ERBB4    | = | 8.2   |
| UNC10225115A | Cl.Cl.CS(=O)(=O)CCNCc1nc(cs1)-<br>c1ccc2ncnc(Nc3ccc4n(Cc5ccccc5)ncc4c3)c2c1 | 15 | MEK5        | MAP2K5   | = | 43    |
| UNC10225115A | c1ccc2ncnc(Nc3ccc4n(Cc5ccccc5)ncc4c3)c2c1                                   | 15 | RIPK2       | RIPK2    | = | 67    |
| UNC10225116A | Fc1ccc(cc1)-c1nn2cccc(F)c2c1-c1ccncc1                                       | 7  | CIT         | CIT      | = | 310   |
| UNC10225116A | Fc1ccc(cc1)-c1nn2cccc(F)c2c1-c1ccncc1                                       | 7  | CSNK1D      | CSNK1D   | = | 77    |
| UNC10225116A | Fc1ccc(cc1)-c1nn2cccc(F)c2c1-c1ccncc1                                       | 7  | CSNK1E      | CSNK1E   | = | 220   |
| UNC10225116A | Fc1ccc(cc1)-c1nn2cccc(F)c2c1-c1ccncc1                                       | 7  | DMPK2       | CDC42BPG | = | 1000  |
| UNC10225116A | Fc1ccc(cc1)-c1nn2cccc(F)c2c1-c1ccncc1                                       | 7  | JNK2        | MAPK9    | = | 230   |
| UNC10225116A | Fc1ccc(cc1)-c1nn2cccc(F)c2c1-c1ccncc1                                       | 7  | JNK3        | MAPK10   | = | 58    |
| UNC10225116A | Fc1ccc(cc1)-c1nn2cccc(F)c2c1-c1ccncc1                                       | 7  | p38-alpha   | MAPK14   | = | 140   |
| UNC10225116A | Fc1ccc(cc1)-c1nn2cccc(F)c2c1-c1ccncc1                                       | 7  | RET         | RET      | > | 10000 |
| UNC10225119A | Nc1nccc2sc(-c3ccc4N(CCc4c3)C(=O)Cc3ccccc3)c12                               | 2  | EPHB6       | EPHB6    | = | 340   |
| UNC10225119A | Nc1nccc2sc(-c3ccc4N(CCc4c3)C(=O)Cc3ccccc3)c12                               | 2  | GRK3        | ADRBK2   | > | 10000 |
| UNC10225119A | Nc1nccc2sc(-c3ccc4N(CCc4c3)C(=O)Cc3ccccc3)c12                               | 2  | MEK5        | MAP2K5   | = | 530   |
| UNC10225122A | Clc1cccc(c1)-c1nc(Nc2ccncc2)c2cccc2n1                                       | 2  | DMPK2       | CDC42BPG | > | 10000 |
| UNC10225122A | Clc1cccc(c1)-c1nc(Nc2ccncc2)c2cccc2n1                                       | 2  | EPHA1       | EPHA1    | > | 10000 |
| UNC10225123A | Cn1cnc2c(N)ncnc12                                                           | 9  | CDKL1       | CDKL1    | > | 10000 |
| UNC10225123A | Cn1cnc2c(N)ncnc12                                                           | 9  | DAPK1       | DAPK1    | > | 10000 |
| UNC10225123A | Cn1cnc2c(N)ncnc12                                                           | 9  | FLT3-autoin | FLT3     | > | 10000 |
| UNC10225123A | Cn1cnc2c(N)ncnc12                                                           | 9  | PDGFRA      | PDGFRA   | > | 10000 |
| UNC10225123A | Cn1cnc2c(N)ncnc12                                                           | 9  | PRKG2       | PRKG2    | > | 10000 |
| UNC10225123A | Cn1cnc2c(N)ncnc12                                                           | 9  | RSK1(Kin.Dc | RPS6KA1  | > | 10000 |
| UNC10225123A | Cn1cnc2c(N)ncnc12                                                           | 9  | VEGFR2      | KDR      | > | 10000 |
| UNC10225123A | Cn1cnc2c(N)ncnc12                                                           | 9  | VRK2        | VRK2     | > | 10000 |
| UNC10225125A | Cc1ccc(cc1)-c1cc(ccn1)-c1c[nH]nc1-c1ccccn1                                  | 2  | ARK5        | NUAK1    | > | 10000 |
| UNC10225125A | Cc1ccc(cc1)-c1cc(ccn1)-c1c[nH]nc1-c1ccccn1                                  | 2  | GAK         | GAK      | = | 110   |
| UNC10225125A | Cc1ccc(cc1)-c1cc(ccn1)-c1c[nH]nc1-c1ccccn1                                  | 2  | MINK        | MINK1    | = | 61    |
| UNC10225125A | Cc1ccc(cc1)-c1cc(ccn1)-c1c[nH]nc1-c1ccccn1                                  | 2  | TGFBR1      | TGFBR1   | = | 260   |
| UNC10225125A | Cc1ccc(cc1)-c1cc(ccn1)-c1c[nH]nc1-c1ccccn1                                  | 2  | TNIK        | TNIK     | = | 160   |
| UNC10225125A | Cc1ccc(cc1)-c1cc(ccn1)-c1c[nH]nc1-c1ccccn1                                  | 2  | WNK4        | WNK4     | > | 10000 |
| UNC10225126A | Cc1csc(n1)-c1nc(Nc2ccncc2)c2cccc2n1                                         | 3  | ACVR1B      | ACVR1B   | = | 39    |
| UNC10225126A | Cc1csc(n1)-c1nc(Nc2ccncc2)c2cccc2n1                                         | 3  | HASPIN      | GSG2     | = | 77    |
| UNC10225126A | Cc1csc(n1)-c1nc(Nc2ccncc2)c2cccc2n1                                         | 3  | TGFBR1      | TGFBR1   | = | 8.9   |
| UNC10225126A | Cc1csc(n1)-c1nc(Nc2ccncc2)c2cccc2n1                                         | 3  | TGFBR2      | TGFBR2   | = | 250   |
| UNC10225126A | Cc1csc(n1)-c1nc(Nc2ccncc2)c2cccc2n1                                         | 3  | TYK2(JH1do  | TYK2     | > | 10000 |
| UNC10225126A | Cc1csc(n1)-c1nc(Nc2ccncc2)c2cccc2n1                                         | 3  | TYK2(JH2do  | TYK2     | = | 530   |
| UNC10225127A | COc1ccc(COc2cc(sc2C(N)=O)-n2cnc3ccccc23)cc1                                 | 4  | PIK3CB      | PIK3CB   | > | 10000 |
| UNC10225127A | COc1ccc(COc2cc(sc2C(N)=O)-n2cnc3ccccc23)cc1                                 | 4  | PLK1        | PLK1     | = | 37    |
| UNC10225127A | COc1ccc(COc2cc(sc2C(N)=O)-n2cnc3ccccc23)cc1                                 | 4  | PLK2        | PLK2     | = | 250   |
| UNC10225127A | COc1ccc(COc2cc(sc2C(N)=O)-n2cnc3ccccc23)cc1                                 | 4  | PLK3        | PLK3     | = | 380   |
| UNC10225127A | COc1ccc(COc2cc(sc2C(N)=O)-n2cnc3ccccc23)cc1                                 | 4  | RIOK2       | RIOK2    | = | 76    |
| UNC10225129A | Fc1ccc(CNc2nccc(n2)N2CCC(CC2)NC(=O)Nc2ccc3OCOc3c2<br>)cc1                   | 2  | MELK        | MELK     | > | 10000 |
| UNC10225129A | Fc1ccc(CNc2nccc(n2)N2CCC(CC2)NC(=O)Nc2ccc3OCOc3c2<br>)cc1                   | 2  | RSK2(Kin.Dc | RPS6KA3  | > | 10000 |
| UNC10225131A | Clc1cccc(Cn2ccn3c2nc(cc3=O)N2CCOCC2)c1                                      | 3  | EPHA3       | EPHA3    | > | 10000 |



|              |                                                                                                                       |   |            |        |   |       |
|--------------|-----------------------------------------------------------------------------------------------------------------------|---|------------|--------|---|-------|
| UNC10225131A | Clc1cccc(Cn2ccn3c2nc(cc3=O)N2CCOCC2)c1                                                                                | 3 | ERBB4      | ERBB4  | > | 10000 |
| UNC10225131A | Clc1cccc(Cn2ccn3c2nc(cc3=O)N2CCOCC2)c1                                                                                | 3 | MARK2      | MARK2  | > | 10000 |
| UNC10225131A | Clc1cccc(Cn2ccn3c2nc(cc3=O)N2CCOCC2)c1                                                                                | 3 | PIK3CB     | PIK3CB | = | 15    |
| UNC10225131A | Clc1cccc(Cn2ccn3c2nc(cc3=O)N2CCOCC2)c1                                                                                | 3 | RET        | RET    | > | 10000 |
| UNC10225131A | Clc1cccc(Cn2ccn3c2nc(cc3=O)N2CCOCC2)c1                                                                                | 3 | VPS34      | PIK3C3 | = | 35    |
| UNC10225133A | Cl.CCS(=O)(=O)c1ccc(OC)c(Nc2ncc(o2)-c2ccc(F)cc2)c1<br>COc1ccc(Nc2nccc(n2)N2CCC(C2)NS(=O)(=O)c2ccc(NC(C)=<br>O)cc2)cc1 | 0 | MAK        | MAK    | > | 10000 |
| UNC10225134A | COc1ccc(Nc2nccc(n2)N2CCC(C2)NS(=O)(=O)c2ccc(NC(C)=<br>O)cc2)cc1                                                       | 6 | FGFR4      | FGFR4  | > | 10000 |
| UNC10225134A | COc1ccc(Nc2nccc(n2)N2CCC(C2)NS(=O)(=O)c2ccc(NC(C)=<br>O)cc2)cc1                                                       | 6 | JAK2(JH1do | JAK2   | = | 38    |
| UNC10225134A | COc1ccc(Nc2nccc(n2)N2CCC(C2)NS(=O)(=O)c2ccc(NC(C)=<br>O)cc2)cc1                                                       | 6 | p38-alpha  | MAPK14 | > | 10000 |
| UNC10225134A | COc1ccc(Nc2nccc(n2)N2CCC(C2)NS(=O)(=O)c2ccc(NC(C)=<br>O)cc2)cc1                                                       | 6 | RIPK2      | RIPK2  | > | 10000 |
| UNC10225134A | COc1ccc(Nc2nccc(n2)N2CCC(C2)NS(=O)(=O)c2ccc(NC(C)=<br>O)cc2)cc1                                                       | 6 | TNNI3K     | TNNI3K | > | 10000 |
| UNC10225134A | COc1ccc(Nc2nccc(n2)N2CCC(C2)NS(=O)(=O)c2ccc(NC(C)=<br>O)cc2)cc1                                                       | 6 | TYK2(JH1do | TYK2   | = | 86    |
| UNC10225134A | COc1ccc(Nc2nccc(n2)N2CCC(C2)NS(=O)(=O)c2ccc(NC(C)=<br>O)cc2)cc1                                                       | 6 | VPS34      | PIK3C3 | = | 97    |
| UNC10225136A | Clc1cccc(Cn2c3cccc3n3c2nc(cc3=O)N2CCOCC2)c1Cl                                                                         | 4 | CDK11      | CDK19  | > | 10000 |
| UNC10225136A | Clc1cccc(Cn2c3cccc3n3c2nc(cc3=O)N2CCOCC2)c1Cl                                                                         | 4 | MELK       | MELK   | > | 10000 |
| UNC10225136A | Clc1cccc(Cn2c3cccc3n3c2nc(cc3=O)N2CCOCC2)c1Cl                                                                         | 4 | PIK3CB     | PIK3CB | = | 860   |
| UNC10225136A | Clc1cccc(Cn2c3cccc3n3c2nc(cc3=O)N2CCOCC2)c1Cl                                                                         | 4 | VPS34      | PIK3C3 | = | 470   |
| UNC10225137A | Clc1cccc(c1)C1=C(N2CCc3cccc23)C(=O)NC1=O                                                                              | 0 | WNK4       | WNK4   | > | 10000 |
| UNC10225138A | FC(F)(F)c1ccc(cc1)-c1nn2ncccc2c1-<br>c1ccnc(Nc2cccc(c2)C(F)(F)F)n1                                                    | 1 | DDR1       | DDR1   | > | 10000 |
| UNC10225138A | FC(F)(F)c1ccc(cc1)-c1nn2ncccc2c1-<br>c1ccnc(Nc2cccc(c2)C(F)(F)F)n1                                                    | 1 | EPHA4      | EPHA4  | > | 10000 |
| UNC10225138A | FC(F)(F)c1ccc(cc1)-c1nn2ncccc2c1-<br>c1ccnc(Nc2cccc(c2)C(F)(F)F)n1                                                    | 1 | FGFR2      | FGFR2  | > | 10000 |
| UNC10225140A | Brc1cc2c(NC(=O)C3CCCC3)n[nH]c2nc1-c1cccs1                                                                             | 2 | CDKL2      | CDKL2  | = | 330   |
| UNC10225140A | Brc1cc2c(NC(=O)C3CCCC3)n[nH]c2nc1-c1cccs1                                                                             | 2 | GSK3A      | GSK3A  | = | 62    |
| UNC10225140A | Brc1cc2c(NC(=O)C3CCCC3)n[nH]c2nc1-c1cccs1                                                                             | 2 | GSK3B      | GSK3B  | = | 120   |
| UNC10225140A | Brc1cc2c(NC(=O)C3CCCC3)n[nH]c2nc1-c1cccs1                                                                             | 2 | MLCK       | MYLK3  | = | 290   |
| UNC10225140A | Brc1cc2c(NC(=O)C3CCCC3)n[nH]c2nc1-c1cccs1                                                                             | 2 | MYLK2      | MYLK2  | = | 26    |
| UNC10225141A | Cl.Cn1ccc(n1)-c1cccc(Nc2ccnc3cc(ccc23)-c2nccs2)c1                                                                     | 4 | EPHA3      | EPHA3  | > | 10000 |
| UNC10225141A | Cl.Cn1ccc(n1)-c1cccc(Nc2ccnc3cc(ccc23)-c2nccs2)c1                                                                     | 4 | EPHB6      | EPHB6  | = | 82    |
| UNC10225141A | Cl.Cn1ccc(n1)-c1cccc(Nc2ccnc3cc(ccc23)-c2nccs2)c1                                                                     | 4 | MARK2      | MARK2  | > | 10000 |
| UNC10225141A | Cl.Cn1ccc(n1)-c1cccc(Nc2ccnc3cc(ccc23)-c2nccs2)c1                                                                     | 4 | MEK5       | MAP2K5 | = | 960   |
| UNC10225141A | Cl.Cn1ccc(n1)-c1cccc(Nc2ccnc3cc(ccc23)-c2nccs2)c1                                                                     | 4 | PAK7       | PAK7   | > | 10000 |
| UNC10225143A | C[C@H]1CC[C@H](CN1c1cc(nc(N)n1)-<br>c1ccc2c(N)n[nH]c2c1)C(=O)Nc1cccc1                                                 | 2 | DRAK1      | STK17A | = | 11    |
| UNC10225143A | C[C@H]1CC[C@H](CN1c1cc(nc(N)n1)-<br>c1ccc2c(N)n[nH]c2c1)C(=O)Nc1cccc1                                                 | 2 | MET        | MET    | > | 10000 |
| UNC10225145A | Cl.Cl.Cl.N#Cc1ccc(CCNc2nccc(n2)-<br>c2cccc(CN3CCNCC3)c2)cc1                                                           | 4 | CIT        | CIT    | = | 8600  |
| UNC10225145A | Cl.Cl.Cl.N#Cc1ccc(CCNc2nccc(n2)-<br>c2cccc(CN3CCNCC3)c2)cc1                                                           | 4 | INSR       | INSR   | > | 10000 |
| UNC10225145A | Cl.Cl.Cl.N#Cc1ccc(CCNc2nccc(n2)-<br>c2cccc(CN3CCNCC3)c2)cc1                                                           | 4 | STK33      | STK33  | = | 3900  |
| UNC10225145A | Cl.Cl.Cl.N#Cc1ccc(CCNc2nccc(n2)-<br>c2cccc(CN3CCNCC3)c2)cc1                                                           | 4 | WEE1       | WEE1   | > | 10000 |
| UNC10225145A | Cl.Cl.Cl.N#Cc1ccc(CCNc2nccc(n2)-<br>c2cccc(CN3CCNCC3)c2)cc1                                                           | 4 | WNK4       | WNK4   | > | 10000 |

|              |                                                            |   |             |         |   |       |
|--------------|------------------------------------------------------------|---|-------------|---------|---|-------|
| UNC10225147A | COc1cccc(CNC(=O)NC2CCN(C2)c2ccnc(Nc3ccc(F)cc3)n2)c1        | 3 | CAMK2G      | CAMK2G  | > | 10000 |
| UNC10225147A | COc1cccc(CNC(=O)NC2CCN(C2)c2ccnc(Nc3ccc(F)cc3)n2)c1        | 3 | TESK1       | TESK1   | = | 9800  |
| UNC10225147A | COc1cccc(CNC(=O)NC2CCN(C2)c2ccnc(Nc3ccc(F)cc3)n2)c1        | 3 | TXK         | TXK     | > | 10000 |
| UNC10225147A | COc1cccc(CNC(=O)NC2CCN(C2)c2ccnc(Nc3ccc(F)cc3)n2)c1        | 3 | ZAK         | ZAK     | > | 10000 |
| UNC10225148A | CC(C)(C)OC(=O)NC1CCCN(C1)c1cc(nc(N)n1)-c1ccc2c(N)n[nH]c2c1 | 6 | DRAK1       | STK17A  | = | 130   |
| UNC10225148A | CC(C)(C)OC(=O)NC1CCCN(C1)c1cc(nc(N)n1)-c1ccc2c(N)n[nH]c2c1 | 6 | DYRK1B      | DYRK1B  | > | 10000 |
| UNC10225148A | CC(C)(C)OC(=O)NC1CCCN(C1)c1cc(nc(N)n1)-c1ccc2c(N)n[nH]c2c1 | 6 | DYRK2       | DYRK2   | = | 440   |
| UNC10225148A | CC(C)(C)OC(=O)NC1CCCN(C1)c1cc(nc(N)n1)-c1ccc2c(N)n[nH]c2c1 | 6 | EPHB2       | EPHB2   | > | 10000 |
| UNC10225148A | CC(C)(C)OC(=O)NC1CCCN(C1)c1cc(nc(N)n1)-c1ccc2c(N)n[nH]c2c1 | 6 | MEK1        | MAP2K1  | > | 10000 |
| UNC10225148A | CC(C)(C)OC(=O)NC1CCCN(C1)c1cc(nc(N)n1)-c1ccc2c(N)n[nH]c2c1 | 6 | PDPK1       | PDPK1   | = | 37    |
| UNC10225148A | CC(C)(C)OC(=O)NC1CCCN(C1)c1cc(nc(N)n1)-c1ccc2c(N)n[nH]c2c1 | 6 | RSK2(Kin.Dc | RPS6KA3 | > | 10000 |
| UNC10225148A | CC(C)(C)OC(=O)NC1CCCN(C1)c1cc(nc(N)n1)-c1ccc2c(N)n[nH]c2c1 | 6 | TSSK3       | TSSK3   | > | 10000 |
| UNC10225149A | Nc1nc(N)c2nc([nH]c2n1)-c1cccc1                             | 0 | JAK1(JH2do  | JAK1    | = | 150   |
| UNC10225152A | Fc1ccc(Nc2nccc(n2)N2CCC(C2)NC(=O)Nc2cccc2F)cc1             | 6 | CSNK1G2     | CSNK1G2 | > | 10000 |
| UNC10225152A | Fc1ccc(Nc2nccc(n2)N2CCC(C2)NC(=O)Nc2cccc2F)cc1             | 6 | ERK1        | MAPK3   | > | 10000 |
| UNC10225152A | Fc1ccc(Nc2nccc(n2)N2CCC(C2)NC(=O)Nc2cccc2F)cc1             | 6 | ICK         | ICK     | > | 10000 |
| UNC10225152A | Fc1ccc(Nc2nccc(n2)N2CCC(C2)NC(=O)Nc2cccc2F)cc1             | 6 | IGF1R       | IGF1R   | > | 10000 |
| UNC10225152A | Fc1ccc(Nc2nccc(n2)N2CCC(C2)NC(=O)Nc2cccc2F)cc1             | 6 | PIK4CB      | PI4KB   | > | 10000 |
| UNC10225152A | Fc1ccc(Nc2nccc(n2)N2CCC(C2)NC(=O)Nc2cccc2F)cc1             | 6 | RIPK4       | RIPK4   | > | 10000 |
| UNC10225156A | CCn1c(nc2cnccc12)-c1ccccn1                                 | 9 | BRSK1       | BRSK1   | > | 10000 |
| UNC10225156A | CCn1c(nc2cnccc12)-c1ccccn1                                 | 9 | CDC2L5      | CDK13   | > | 10000 |
| UNC10225156A | CCn1c(nc2cnccc12)-c1ccccn1                                 | 9 | IRAK3       | IRAK3   | = | 7500  |
| UNC10225156A | CCn1c(nc2cnccc12)-c1ccccn1                                 | 9 | MEK6        | MAP2K6  | > | 10000 |
| UNC10225156A | CCn1c(nc2cnccc12)-c1ccccn1                                 | 9 | NEK1        | NEK1    | > | 10000 |
| UNC10225156A | CCn1c(nc2cnccc12)-c1ccccn1                                 | 9 | PDPK1       | PDPK1   | > | 10000 |
| UNC10225156A | CCn1c(nc2cnccc12)-c1ccccn1                                 | 9 | PKAC-alpha  | PRKACA  | > | 10000 |
| UNC10225156A | CCn1c(nc2cnccc12)-c1ccccn1                                 | 9 | PRKX        | PRKX    | > | 10000 |
| UNC10225156A | CCn1c(nc2cnccc12)-c1ccccn1                                 | 9 | YSK1        | STK25   | > | 10000 |
| UNC10225161A | COc(=O)C(NC(=O)NC1CCN(C1)c1ccnc(Nc2ccc(F)cc2)n1)c1cccc1    | 2 | CDK2        | CDK2    | > | 10000 |
| UNC10225161A | COc(=O)C(NC(=O)NC1CCN(C1)c1ccnc(Nc2ccc(F)cc2)n1)c1cccc1    | 2 | CSNK1D      | CSNK1D  | > | 10000 |
| UNC10225161A | COc(=O)C(NC(=O)NC1CCN(C1)c1ccnc(Nc2ccc(F)cc2)n1)c1cccc1    | 2 | EPHB6       | EPHB6   | = | 58    |
| UNC10225161A | COc(=O)C(NC(=O)NC1CCN(C1)c1ccnc(Nc2ccc(F)cc2)n1)c1cccc1    | 2 | MEK5        | MAP2K5  | = | 270   |
| UNC10225162A | COc1ccc(Nc2nccc(n2)N2CCC(C2)NC(=O)C(C)c2ccc(Cl)cc2)cc1     | 7 | CDKL5       | CDKL5   | > | 10000 |
| UNC10225162A | COc1ccc(Nc2nccc(n2)N2CCC(C2)NC(=O)C(C)c2ccc(Cl)cc2)cc1     | 7 | DYRK1A      | DYRK1A  | > | 10000 |
| UNC10225162A | COc1ccc(Nc2nccc(n2)N2CCC(C2)NC(=O)C(C)c2ccc(Cl)cc2)cc1     | 7 | EPHB6       | EPHB6   | > | 10000 |

|              |                                                                |   |              |          |   |       |
|--------------|----------------------------------------------------------------|---|--------------|----------|---|-------|
| UNC10225162A | COc1ccc(Nc2nccc(n2)N2CCC(CC2)NC(=O)C(C)c2ccc(Cl)cc2)<br>cc1    | 7 | IKK-epsilon  | IKBKE    | > | 10000 |
| UNC10225162A | COc1ccc(Nc2nccc(n2)N2CCC(CC2)NC(=O)C(C)c2ccc(Cl)cc2)<br>cc1    | 7 | LATS2        | LATS2    | > | 10000 |
| UNC10225162A | COc1ccc(Nc2nccc(n2)N2CCC(CC2)NC(=O)C(C)c2ccc(Cl)cc2)<br>cc1    | 7 | PCTK1        | CDK16    | > | 10000 |
| UNC10225162A | COc1ccc(Nc2nccc(n2)N2CCC(CC2)NC(=O)C(C)c2ccc(Cl)cc2)<br>cc1    | 7 | RSK2(Kin.Dc) | RPS6KA3  | > | 10000 |
| UNC10225163A | Fc1ccc(cc1)-c1nc2SCCn2c1-c1ccncc1                              | 8 | CIT          | CIT      | = | 760   |
| UNC10225163A | Fc1ccc(cc1)-c1nc2SCCn2c1-c1ccncc1                              | 8 | CSNK1A1      | CSNK1A1  | = | 260   |
| UNC10225163A | Fc1ccc(cc1)-c1nc2SCCn2c1-c1ccncc1                              | 8 | CSNK1D       | CSNK1D   | = | 83    |
| UNC10225163A | Fc1ccc(cc1)-c1nc2SCCn2c1-c1ccncc1                              | 8 | CSNK1E       | CSNK1E   | = | 180   |
| UNC10225163A | Fc1ccc(cc1)-c1nc2SCCn2c1-c1ccncc1                              | 8 | DMPK2        | CDC42BPG | = | 1200  |
| UNC10225163A | Fc1ccc(cc1)-c1nc2SCCn2c1-c1ccncc1                              | 8 | JNK2         | MAPK9    | = | 270   |
| UNC10225163A | Fc1ccc(cc1)-c1nc2SCCn2c1-c1ccncc1                              | 8 | JNK3         | MAPK10   | = | 57    |
| UNC10225163A | Fc1ccc(cc1)-c1nc2SCCn2c1-c1ccncc1                              | 8 | p38-alpha    | MAPK14   | = | 130   |
| UNC10225163A | Fc1ccc(cc1)-c1nc2SCCn2c1-c1ccncc1                              | 8 | PIK3C2B      | PIK3C2B  | > | 10000 |
| UNC10225163A | Fc1ccc(cc1)-c1nc2SCCn2c1-c1ccncc1                              | 8 | PIK3CA       | PIK3CA   | > | 10000 |
| UNC10225163A | Fc1ccc(cc1)-c1nc2SCCn2c1-c1ccncc1                              | 8 | PIK3CG       | PIK3CG   | > | 10000 |
| UNC10225163A | Fc1ccc(cc1)-c1nc2SCCn2c1-c1ccncc1                              | 8 | RSK4(Kin.Dc) | RPS6KA6  | = | 260   |
| UNC10225164A | COC(=O)c1cccc(NC(=O)NC2CCN(C2)c2ccnc(Nc3ccc(F)cc3)<br>n2)c1    | 0 | CDKL2        | CDKL2    | = | 680   |
| UNC10225164A | COC(=O)c1cccc(NC(=O)NC2CCN(C2)c2ccnc(Nc3ccc(F)cc3)<br>n2)c1    | 0 | TRKC         | NTRK3    | = | 340   |
| UNC10225165A | Cn1cc(-<br>c2ccc3N(Cc3c2)C(=O)Cc2cccc(c2)C(F)(F)F)c2c(N)ncnc12 | 5 | DAPK3        | DAPK3    | > | 10000 |
| UNC10225165A | Cn1cc(-<br>c2ccc3N(Cc3c2)C(=O)Cc2cccc(c2)C(F)(F)F)c2c(N)ncnc12 | 5 | DDR1         | DDR1     | = | 280   |
| UNC10225165A | Cn1cc(-<br>c2ccc3N(Cc3c2)C(=O)Cc2cccc(c2)C(F)(F)F)c2c(N)ncnc12 | 5 | GRK4         | GRK4     | > | 10000 |
| UNC10225165A | Cn1cc(-<br>c2ccc3N(Cc3c2)C(=O)Cc2cccc(c2)C(F)(F)F)c2c(N)ncnc12 | 5 | KIT          | KIT      | = | 5200  |
| UNC10225165A | Cn1cc(-<br>c2ccc3N(Cc3c2)C(=O)Cc2cccc(c2)C(F)(F)F)c2c(N)ncnc12 | 5 | MAPKAPK2     | MAPKAPK2 | > | 10000 |
| UNC10225165A | Cn1cc(-<br>c2ccc3N(Cc3c2)C(=O)Cc2cccc(c2)C(F)(F)F)c2c(N)ncnc12 | 5 | SRPK3        | SRPK3    | > | 10000 |
| UNC10225167A | Clc1cccc(Cn2ccn3c2nc(cc3=O)N2CCOCC2)c1Cl                       | 4 | AXL          | AXL      | > | 10000 |
| UNC10225167A | Clc1cccc(Cn2ccn3c2nc(cc3=O)N2CCOCC2)c1Cl                       | 4 | LYN          | LYN      | > | 10000 |
| UNC10225167A | Clc1cccc(Cn2ccn3c2nc(cc3=O)N2CCOCC2)c1Cl                       | 4 | PIK3CB       | PIK3CB   | = | 3.5   |
| UNC10225167A | Clc1cccc(Cn2ccn3c2nc(cc3=O)N2CCOCC2)c1Cl                       | 4 | PIK3CD       | PIK3CD   | = | 79    |
| UNC10225167A | Clc1cccc(Cn2ccn3c2nc(cc3=O)N2CCOCC2)c1Cl                       | 4 | VPS34        | PIK3C3   | = | 2.1   |
| UNC10225168A | Clc1cccc1C1=C(Nc2cccc2)C(=O)NC1=O                              | 2 | CSNK1G1      | CSNK1G1  | > | 10000 |
| UNC10225168A | Clc1cccc1C1=C(Nc2cccc2)C(=O)NC1=O                              | 2 | GAK          | GAK      | > | 10000 |
| UNC10225168A | Clc1cccc1C1=C(Nc2cccc2)C(=O)NC1=O                              | 2 | LKB1         | STK11    | > | 10000 |
| UNC10225169A | c1[nH]nc(c1-c1ccnc(c1)-c1cccc1)-c1ccccn1                       | 1 | RIPK2        | RIPK2    | = | 7600  |
| UNC10225169A | c1[nH]nc(c1-c1ccnc(c1)-c1cccc1)-c1ccccn1                       | 1 | TNNI3K       | TNNI3K   | > | 10000 |
| UNC10225170A | Cl.COc1cc2nccc(Nc3cccc(Oc4cccc4)c3)c2cc1OC                     | 2 | MEK1         | MAP2K1   | = | 100   |
| UNC10225170A | Cl.COc1cc2nccc(Nc3cccc(Oc4cccc4)c3)c2cc1OC                     | 2 | MEK2         | MAP2K2   | = | 270   |
| UNC10225170A | Cl.COc1cc2nccc(Nc3cccc(Oc4cccc4)c3)c2cc1OC                     | 2 | MEK5         | MAP2K5   | = | 11    |
| UNC10225170A | Cl.COc1cc2nccc(Nc3cccc(Oc4cccc4)c3)c2cc1OC                     | 2 | RIPK2        | RIPK2    | = | 440   |
| UNC10225175A | Cc1cccc(n1)-c1nc(C)cc(Nc2ccncc2)n1                             | 9 | AAK1         | AAK1     | > | 10000 |
| UNC10225175A | Cc1cccc(n1)-c1nc(C)cc(Nc2ccncc2)n1                             | 9 | CAMK1G       | CAMK1G   | > | 10000 |
| UNC10225175A | Cc1cccc(n1)-c1nc(C)cc(Nc2ccncc2)n1                             | 9 | CAMK2D       | CAMK2D   | > | 10000 |
| UNC10225175A | Cc1cccc(n1)-c1nc(C)cc(Nc2ccncc2)n1                             | 9 | CDC2L1       | CDK11B   | > | 10000 |
| UNC10225175A | Cc1cccc(n1)-c1nc(C)cc(Nc2ccncc2)n1                             | 9 | CDK9         | CDK9     | > | 10000 |

|              |                                                           |   |             |          |   |       |
|--------------|-----------------------------------------------------------|---|-------------|----------|---|-------|
| UNC10225175A | Cc1cccc(n1)-c1nc(C)cc(Nc2ccncc2)n1                        | 9 | DMPK2       | CDC42BPG | = | 560   |
| UNC10225175A | Cc1cccc(n1)-c1nc(C)cc(Nc2ccncc2)n1                        | 9 | ERK4        | MAPK4    | > | 10000 |
| UNC10225175A | Cc1cccc(n1)-c1nc(C)cc(Nc2ccncc2)n1                        | 9 | MRCKB       | CDC42BPB | = | 580   |
| UNC10225175A | Cc1cccc(n1)-c1nc(C)cc(Nc2ccncc2)n1                        | 9 | PRKD2       | PRKD2    | = | 1100  |
| UNC10225175A | Cc1cccc(n1)-c1nc(C)cc(Nc2ccncc2)n1                        | 9 | PRKD3       | PRKD3    | = | 1000  |
| UNC10225175A | Cc1cccc(n1)-c1nc(C)cc(Nc2ccncc2)n1                        | 9 | RAF1        | RAF1     | > | 10000 |
| UNC10225175A | Cc1cccc(n1)-c1nc(C)cc(Nc2ccncc2)n1                        | 9 | TGFBR1      | TGFBR1   | = | 200   |
| UNC10225177A | COc1ccc(Nc2nccc(n2)N2CCC(C2)NC(=O)Nc2ccc3OCOCc3c2)cc1     | 0 | CSNK1D      | CSNK1D   | > | 10000 |
| UNC10225178A | Cc1nn2c(nc(cc2=O)N2CCOCC2)n1Cc1cccc(Cl)c1Cl               | 3 | GRK3        | ADRBK2   | > | 10000 |
| UNC10225178A | Cc1nn2c(nc(cc2=O)N2CCOCC2)n1Cc1cccc(Cl)c1Cl               | 3 | PFTK1       | CDK14    | > | 10000 |
| UNC10225178A | Cc1nn2c(nc(cc2=O)N2CCOCC2)n1Cc1cccc(Cl)c1Cl               | 3 | PIK3C2B     | PIK3C2B  | = | 130   |
| UNC10225178A | Cc1nn2c(nc(cc2=O)N2CCOCC2)n1Cc1cccc(Cl)c1Cl               | 3 | PIK3CB      | PIK3CB   | = | 0.79  |
| UNC10225178A | Cc1nn2c(nc(cc2=O)N2CCOCC2)n1Cc1cccc(Cl)c1Cl               | 3 | PIK3CD      | PIK3CD   | = | 200   |
| UNC10225178A | Cc1nn2c(nc(cc2=O)N2CCOCC2)n1Cc1cccc(Cl)c1Cl               | 3 | VPS34       | PIK3C3   | = | 0.43  |
| UNC10225180A | Brc1cc2c(NC(=O)C3CC3)n[nH]c2nc1-c1nccs1                   | 5 | BRSK1       | BRSK1    | = | 230   |
| UNC10225180A | Brc1cc2c(NC(=O)C3CC3)n[nH]c2nc1-c1nccs1                   | 5 | BRSK2       | BRSK2    | = | 140   |
| UNC10225180A | Brc1cc2c(NC(=O)C3CC3)n[nH]c2nc1-c1nccs1                   | 5 | CDK2        | CDK2     | = | 350   |
| UNC10225180A | Brc1cc2c(NC(=O)C3CC3)n[nH]c2nc1-c1nccs1                   | 5 | CDKL2       | CDKL2    | = | 480   |
| UNC10225180A | Brc1cc2c(NC(=O)C3CC3)n[nH]c2nc1-c1nccs1                   | 5 | ERK8        | MAPK15   | = | 870   |
| UNC10225180A | Brc1cc2c(NC(=O)C3CC3)n[nH]c2nc1-c1nccs1                   | 5 | FLT3        | FLT3     | = | 190   |
| UNC10225180A | Brc1cc2c(NC(=O)C3CC3)n[nH]c2nc1-c1nccs1                   | 5 | GSK3A       | GSK3A    | = | 290   |
| UNC10225180A | Brc1cc2c(NC(=O)C3CC3)n[nH]c2nc1-c1nccs1                   | 5 | MYLK2       | MYLK2    | = | 160   |
| UNC10225180A | Brc1cc2c(NC(=O)C3CC3)n[nH]c2nc1-c1nccs1                   | 5 | YSK4        | MAP3K19  | = | 210   |
| UNC10225182A | Cl.Cc1ccc(cc1)C(=O)Nc1ccc(Nc2ccnc3ccc(ccc23)-c2cccn2)cc1O | 6 | AURKB       | AURKB    | = | 290   |
| UNC10225182A | Cl.Cc1ccc(cc1)C(=O)Nc1ccc(Nc2ccnc3ccc(ccc23)-c2cccn2)cc1O | 6 | AURKC       | AURKC    | = | 500   |
| UNC10225182A | Cl.Cc1ccc(cc1)C(=O)Nc1ccc(Nc2ccnc3ccc(ccc23)-c2cccn2)cc1O | 6 | BLK         | BLK      | = | 63    |
| UNC10225182A | Cl.Cc1ccc(cc1)C(=O)Nc1ccc(Nc2ccnc3ccc(ccc23)-c2cccn2)cc1O | 6 | KIT         | KIT      | = | 2200  |
| UNC10225182A | Cl.Cc1ccc(cc1)C(=O)Nc1ccc(Nc2ccnc3ccc(ccc23)-c2cccn2)cc1O | 6 | LCK         | LCK      | = | 260   |
| UNC10225182A | Cl.Cc1ccc(cc1)C(=O)Nc1ccc(Nc2ccnc3ccc(ccc23)-c2cccn2)cc1O | 6 | MEK5        | MAP2K5   | = | 4.7   |
| UNC10225182A | Cl.Cc1ccc(cc1)C(=O)Nc1ccc(Nc2ccnc3ccc(ccc23)-c2cccn2)cc1O | 6 | PDGFRB      | PDGFRB   | = | 480   |
| UNC10225182A | Cl.Cc1ccc(cc1)C(=O)Nc1ccc(Nc2ccnc3ccc(ccc23)-c2cccn2)cc1O | 6 | PIK3CD      | PIK3CD   | > | 10000 |
| UNC10225182A | Cl.Cc1ccc(cc1)C(=O)Nc1ccc(Nc2ccnc3ccc(ccc23)-c2cccn2)cc1O | 6 | RIOK3       | RIOK3    | > | 10000 |
| UNC10225182A | Cl.Cc1ccc(cc1)C(=O)Nc1ccc(Nc2ccnc3ccc(ccc23)-c2cccn2)cc1O | 6 | SRMS        | SRMS     | = | 350   |
| UNC10225182A | Cl.Cc1ccc(cc1)C(=O)Nc1ccc(Nc2ccnc3ccc(ccc23)-c2cccn2)cc1O | 6 | TNK2        | TNK2     | = | 120   |
| UNC10225184A | FC(F)(F)c1cccc1-c1cc(ccn1)-c1c[nH]nc1-c1cccn1             | 5 | CHEK1       | CHEK1    | > | 10000 |
| UNC10225184A | FC(F)(F)c1cccc1-c1cc(ccn1)-c1c[nH]nc1-c1cccn1             | 5 | EPHB6       | EPHB6    | = | 8500  |
| UNC10225184A | FC(F)(F)c1cccc1-c1cc(ccn1)-c1c[nH]nc1-c1cccn1             | 5 | IKK-epsilon | IKBKE    | > | 10000 |
| UNC10225184A | FC(F)(F)c1cccc1-c1cc(ccn1)-c1c[nH]nc1-c1cccn1             | 5 | p38-alpha   | MAPK14   | = | 310   |
| UNC10225184A | FC(F)(F)c1cccc1-c1cc(ccn1)-c1c[nH]nc1-c1cccn1             | 5 | PRKD3       | PRKD3    | > | 10000 |
| UNC10225185A | Nc1n[nH]c2nnc(-c3ccccc3)c(-c3ccccc3)c12                   | 3 | GSK3A       | GSK3A    | = | 300   |
| UNC10225185A | Nc1n[nH]c2nnc(-c3ccccc3)c(-c3ccccc3)c12                   | 3 | HIPK2       | HIPK2    | = | 410   |
| UNC10225185A | Nc1n[nH]c2nnc(-c3ccccc3)c(-c3ccccc3)c12                   | 3 | LYN         | LYN      | > | 10000 |
| UNC10225185A | Nc1n[nH]c2nnc(-c3ccccc3)c(-c3ccccc3)c12                   | 3 | NIK         | MAP3K14  | > | 10000 |

|              |                                                                  |    |             |         |   |       |
|--------------|------------------------------------------------------------------|----|-------------|---------|---|-------|
| UNC10225186A | CCCC(=O)Nc1n[nH]c2ncc(cc12)-c1cccc2cccc12                        | 2  | GSK3A       | GSK3A   | = | 360   |
| UNC10225186A | CCCC(=O)Nc1n[nH]c2ncc(cc12)-c1cccc2cccc12                        | 2  | NEK10       | NEK10   | > | 10000 |
| UNC10225186A | CCCC(=O)Nc1n[nH]c2ncc(cc12)-c1cccc2cccc12                        | 2  | TLK2        | TLK2    | > | 10000 |
| UNC10225189A | Fc1cc(Cl)ccc1Nc1ccnc2cc(l)ccc12                                  | 0  | ACVR2B      | ACVR2B  | = | 110   |
| UNC10225189A | Fc1cc(Cl)ccc1Nc1ccnc2cc(l)ccc12                                  | 0  | GAK         | GAK     | = | 340   |
| UNC10225189A | Fc1cc(Cl)ccc1Nc1ccnc2cc(l)ccc12                                  | 0  | MST1R       | MST1R   | > | 10000 |
| UNC10225189A | Fc1cc(Cl)ccc1Nc1ccnc2cc(l)ccc12                                  | 0  | PDGFRB      | PDGFRB  | = | 410   |
| UNC10225189A | Fc1cc(Cl)ccc1Nc1ccnc2cc(l)ccc12                                  | 0  | RSK4(Kin.Dc | RPS6KA6 | = | 730   |
| UNC10225192A | FC(F)(F)c1cc(Nc2nccc(n2)-c2c(nn3ncccc23)-<br>c2ccc(Cl)cc2)ccc1Cl | 0  | CSNK1D      | CSNK1D  | = | 2200  |
| UNC10225193A | COc1ccc(Nc2nccc(NCCNC(=O)Nc3cc(C)ccc3C)n2)cc1                    | 3  | CHEK2       | CHEK2   | > | 10000 |
| UNC10225193A | COc1ccc(Nc2nccc(NCCNC(=O)Nc3cc(C)ccc3C)n2)cc1                    | 3  | PIK3C2B     | PIK3C2B | > | 10000 |
| UNC10225193A | COc1ccc(Nc2nccc(NCCNC(=O)Nc3cc(C)ccc3C)n2)cc1                    | 3  | PIK3CA      | PIK3CA  | > | 10000 |
| UNC10225195A | Cc1c(Cn2c3cccc3n3c2nc(cc3=O)N2CCOCC2)cccc1C(F)(F)F               | 7  | CDC2L1      | CDK11B  | > | 10000 |
| UNC10225195A | Cc1c(Cn2c3cccc3n3c2nc(cc3=O)N2CCOCC2)cccc1C(F)(F)F               | 7  | CDK9        | CDK9    | > | 10000 |
| UNC10225195A | Cc1c(Cn2c3cccc3n3c2nc(cc3=O)N2CCOCC2)cccc1C(F)(F)F               | 7  | ERK4        | MAPK4   | > | 10000 |
| UNC10225195A | Cc1c(Cn2c3cccc3n3c2nc(cc3=O)N2CCOCC2)cccc1C(F)(F)F               | 7  | PIK3CB      | PIK3CB  | = | 680   |
| UNC10225195A | Cc1c(Cn2c3cccc3n3c2nc(cc3=O)N2CCOCC2)cccc1C(F)(F)F               | 7  | PIK4CB      | PI4KB   | > | 10000 |
| UNC10225195A | Cc1c(Cn2c3cccc3n3c2nc(cc3=O)N2CCOCC2)cccc1C(F)(F)F               | 7  | PKN1        | PKN1    | > | 10000 |
| UNC10225195A | Cc1c(Cn2c3cccc3n3c2nc(cc3=O)N2CCOCC2)cccc1C(F)(F)F               | 7  | VPS34       | PIK3C3  | > | 10000 |
| UNC10225199A | Cc1ccc(C)c(NC(=O)NCCNc2ccnc(Nc3ccc(F)cc3)n2)c1                   | 4  | CSK         | CSK     | > | 10000 |
| UNC10225199A | Cc1ccc(C)c(NC(=O)NCCNc2ccnc(Nc3ccc(F)cc3)n2)c1                   | 4  | ERK5        | MAPK7   | > | 10000 |
| UNC10225199A | Cc1ccc(C)c(NC(=O)NCCNc2ccnc(Nc3ccc(F)cc3)n2)c1                   | 4  | PAK6        | PAK6    | > | 10000 |
| UNC10225199A | Cc1ccc(C)c(NC(=O)NCCNc2ccnc(Nc3ccc(F)cc3)n2)c1                   | 4  | STK16       | STK16   | > | 10000 |
| UNC10225200A | COc1cccc(NC(=O)Nc2ccc(C)c(c2)-<br>c2ccc(cc2)C(=O)Nc2ccncc2)c1    | 15 | BRSK2       | BRSK2   | > | 10000 |
| UNC10225200A | COc1cccc(NC(=O)Nc2ccc(C)c(c2)-<br>c2ccc(cc2)C(=O)Nc2ccncc2)c1    | 15 | CIT         | CIT     | = | 280   |
| UNC10225200A | COc1cccc(NC(=O)Nc2ccc(C)c(c2)-<br>c2ccc(cc2)C(=O)Nc2ccncc2)c1    | 15 | CSF1R       | CSF1R   | = | 3300  |
| UNC10225200A | COc1cccc(NC(=O)Nc2ccc(C)c(c2)-<br>c2ccc(cc2)C(=O)Nc2ccncc2)c1    | 15 | DDR1        | DDR1    | = | 270   |
| UNC10225200A | COc1cccc(NC(=O)Nc2ccc(C)c(c2)-<br>c2ccc(cc2)C(=O)Nc2ccncc2)c1    | 15 | IKK-beta    | IKBKB   | > | 10000 |
| UNC10225200A | COc1cccc(NC(=O)Nc2ccc(C)c(c2)-<br>c2ccc(cc2)C(=O)Nc2ccncc2)c1    | 15 | KIT         | KIT     | = | 73    |
| UNC10225200A | COc1cccc(NC(=O)Nc2ccc(C)c(c2)-<br>c2ccc(cc2)C(=O)Nc2ccncc2)c1    | 15 | LYN         | LYN     | = | 4400  |
| UNC10225200A | COc1cccc(NC(=O)Nc2ccc(C)c(c2)-<br>c2ccc(cc2)C(=O)Nc2ccncc2)c1    | 15 | MAK         | MAK     | > | 10000 |
| UNC10225200A | COc1cccc(NC(=O)Nc2ccc(C)c(c2)-<br>c2ccc(cc2)C(=O)Nc2ccncc2)c1    | 15 | MARK1       | MARK1   | > | 10000 |
| UNC10225200A | COc1cccc(NC(=O)Nc2ccc(C)c(c2)-<br>c2ccc(cc2)C(=O)Nc2ccncc2)c1    | 15 | PDGFRB      | PDGFRB  | = | 40    |
| UNC10225200A | COc1cccc(NC(=O)Nc2ccc(C)c(c2)-<br>c2ccc(cc2)C(=O)Nc2ccncc2)c1    | 15 | PIK3C2B     | PIK3C2B | > | 10000 |
| UNC10225200A | COc1cccc(NC(=O)Nc2ccc(C)c(c2)-<br>c2ccc(cc2)C(=O)Nc2ccncc2)c1    | 15 | PIK3CA      | PIK3CA  | > | 10000 |

|              |                                                      |    |             |          |   |       |
|--------------|------------------------------------------------------|----|-------------|----------|---|-------|
|              | COc1cccc(NC(=O)Nc2ccc(C)c(c2)-                       |    |             |          |   |       |
| UNC10225200A | c2ccc(cc2)C(=O)Nc2ccncc2)c1                          | 15 | PIK3CG      | PIK3CG   | > | 10000 |
| UNC10225201A | Nc1nc(c(s1)-c1ccnc2ccccc12)-c1ccccn1                 | 0  | CSNK1A1     | CSNK1A1  | = | 1200  |
| UNC10225201A | Nc1nc(c(s1)-c1ccnc2ccccc12)-c1ccccn1                 | 0  | CSNK1D      | CSNK1D   | = | 1800  |
| UNC10225201A | Nc1nc(c(s1)-c1ccnc2ccccc12)-c1ccccn1                 | 0  | PIP5K1C     | PIP5K1C  | > | 10000 |
| UNC10225201A | Nc1nc(c(s1)-c1ccnc2ccccc12)-c1ccccn1                 | 0  | WNK4        | WNK4     | > | 10000 |
| UNC10225202A | Cc1cccc(Cn2ccn3c2nc(cc3=O)N2CCOCC2)c1                | 2  | PIK3CB      | PIK3CB   | = | 23    |
| UNC10225202A | Cc1cccc(Cn2ccn3c2nc(cc3=O)N2CCOCC2)c1                | 2  | VPS34       | PIK3C3   | = | 75    |
| UNC10225203A | Nc1ncnc2n(cnc12)-c1ccc(Cl)cc1                        | 0  | NIK         | MAP3K14  | > | 10000 |
| UNC10225203A | Nc1ncnc2n(cnc12)-c1ccc(Cl)cc1                        | 0  | PDGFRB      | PDGFRB   | = | 1200  |
| UNC10225204A | CCn1c(nc2cnccc12)-c1cnccc1                           | 3  | EPHA3       | EPHA3    | > | 10000 |
| UNC10225204A | CCn1c(nc2cnccc12)-c1cnccc1                           | 3  | MARK2       | MARK2    | > | 10000 |
| UNC10225204A | CCn1c(nc2cnccc12)-c1cnccc1                           | 3  | MARK3       | MARK3    | > | 10000 |
| UNC10225205A | CCc1nc(c(s1)-c1ccnc(Nc2ccc(nc2)N2CCN(CC2)C(C)=O)n1)- |    |             |          |   |       |
|              | c1cccc(c1)N(C)S(=O)(=O)c1cccc1                       | 7  | EPHB6       | EPHB6    | = | 24    |
| UNC10225205A | CCc1nc(c(s1)-c1ccnc(Nc2ccc(nc2)N2CCN(CC2)C(C)=O)n1)- |    |             |          |   |       |
|              | c1cccc(c1)N(C)S(=O)(=O)c1cccc1                       | 7  | GAK         | GAK      | = | 250   |
| UNC10225205A | CCc1nc(c(s1)-c1ccnc(Nc2ccc(nc2)N2CCN(CC2)C(C)=O)n1)- |    |             |          |   |       |
|              | c1cccc(c1)N(C)S(=O)(=O)c1cccc1                       | 7  | MEK5        | MAP2K5   | = | 7     |
| UNC10225205A | CCc1nc(c(s1)-c1ccnc(Nc2ccc(nc2)N2CCN(CC2)C(C)=O)n1)- |    |             |          |   |       |
|              | c1cccc(c1)N(C)S(=O)(=O)c1cccc1                       | 7  | RIPK2       | RIPK2    | = | 130   |
| UNC10225205A | CCc1nc(c(s1)-c1ccnc(Nc2ccc(nc2)N2CCN(CC2)C(C)=O)n1)- |    |             |          |   |       |
|              | c1cccc(c1)N(C)S(=O)(=O)c1cccc1                       | 7  | STK36       | STK36    | = | 56    |
| UNC10225205A | CCc1nc(c(s1)-c1ccnc(Nc2ccc(nc2)N2CCN(CC2)C(C)=O)n1)- |    |             |          |   |       |
|              | c1cccc(c1)N(C)S(=O)(=O)c1cccc1                       | 7  | ZAK         | ZAK      | = | 220   |
| UNC10225209A | Nc1n[nH]c2nnc(cc12)-c1cccc1                          | 2  | DYRK1B      | DYRK1B   | = | 7000  |
| UNC10225209A | Nc1n[nH]c2nnc(cc12)-c1cccc1                          | 2  | EPHB2       | EPHB2    | > | 10000 |
| UNC10225209A | Nc1n[nH]c2nnc(cc12)-c1cccc1                          | 2  | HIPK3       | HIPK3    | = | 290   |
| UNC10225209A | Nc1n[nH]c2nnc(cc12)-c1cccc1                          | 2  | MLCK        | MYLK3    | > | 10000 |
| UNC10225209A | Nc1n[nH]c2nnc(cc12)-c1cccc1                          | 2  | RET         | RET      | > | 10000 |
| UNC10225209A | Nc1n[nH]c2nnc(cc12)-c1cccc1                          | 2  | TSSK3       | TSSK3    | > | 10000 |
| UNC10225210A | Fc1ccc(Nc2nccc(NCCNC(=O)Nc3ccccc3F)n2)cc1            | 1  | PLK1        | PLK1     | > | 10000 |
| UNC10225212A | CN1C(=O)C(Nc2cc(Cl)c(O)c(Cl)c2)=C(C1=O)c1ccc(Cl)cc1  | 3  | GRK4        | GRK4     | > | 10000 |
| UNC10225212A | CN1C(=O)C(Nc2cc(Cl)c(O)c(Cl)c2)=C(C1=O)c1ccc(Cl)cc1  | 3  | MAPKAPK2    | MAPKAPK2 | > | 10000 |
| UNC10225212A | CN1C(=O)C(Nc2cc(Cl)c(O)c(Cl)c2)=C(C1=O)c1ccc(Cl)cc1  | 3  | SRPK3       | SRPK3    | > | 10000 |
| UNC10225212A | CN1C(=O)C(Nc2cc(Cl)c(O)c(Cl)c2)=C(C1=O)c1ccc(Cl)cc1  | 3  | VRK2        | VRK2     | > | 10000 |
| UNC10225213A | COc1nccc(n1)-c1c(ncn1CCCN1CCOCC1)-c1ccc(F)cc1        | 3  | CDK4        | CDK4     | > | 10000 |
| UNC10225213A | COc1nccc(n1)-c1c(ncn1CCCN1CCOCC1)-c1ccc(F)cc1        | 3  | p38-alpha   | MAPK14   | = | 160   |
| UNC10225220A | Fc1cc(Cl)ccc1Nc1ccnc2cc(ccc12)-c1ccc(CN2CCCC2)o1     | 8  | AURKA       | AURKA    | > | 10000 |
| UNC10225220A | Fc1cc(Cl)ccc1Nc1ccnc2cc(ccc12)-c1ccc(CN2CCCC2)o1     | 8  | CSNK2A2     | CSNK2A2  | > | 10000 |
| UNC10225220A | Fc1cc(Cl)ccc1Nc1ccnc2cc(ccc12)-c1ccc(CN2CCCC2)o1     | 8  | MEK2        | MAP2K2   | > | 10000 |
| UNC10225220A | Fc1cc(Cl)ccc1Nc1ccnc2cc(ccc12)-c1ccc(CN2CCCC2)o1     | 8  | MEK5        | MAP2K5   | = | 890   |
| UNC10225220A | Fc1cc(Cl)ccc1Nc1ccnc2cc(ccc12)-c1ccc(CN2CCCC2)o1     | 8  | PDGFRB      | PDGFRB   | = | 210   |
| UNC10225220A | Fc1cc(Cl)ccc1Nc1ccnc2cc(ccc12)-c1ccc(CN2CCCC2)o1     | 8  | PDPK1       | PDPK1    | > | 10000 |
| UNC10225220A | Fc1cc(Cl)ccc1Nc1ccnc2cc(ccc12)-c1ccc(CN2CCCC2)o1     | 8  | PKAC-alpha  | PRKACA   | > | 10000 |
| UNC10225220A | Fc1cc(Cl)ccc1Nc1ccnc2cc(ccc12)-c1ccc(CN2CCCC2)o1     | 8  | RSK4(Kin.Dc | RPS6KA6  | = | 670   |
| UNC10225220A | Fc1cc(Cl)ccc1Nc1ccnc2cc(ccc12)-c1ccc(CN2CCCC2)o1     | 8  | SRC         | SRC      | = | 4400  |
| UNC10225222A | OC(=O)C(F)(F)F.Cc1cc(nc(Nc2cccc(c2)C#N)n1)N1CCC(CC1) |    |             |          |   |       |
|              | NS(=O)(=O)c1ccc(F)cc1                                | 1  | DYRK1B      | DYRK1B   | = | 2800  |
| UNC10225225A | Cc1c(C)n2c(nc(cc2=O)N2CCOCC2)n1Cc1cccc(c1C)C(F)(F)F  | 5  | CDKL1       | CDKL1    | > | 10000 |
| UNC10225225A | Cc1c(C)n2c(nc(cc2=O)N2CCOCC2)n1Cc1cccc(c1C)C(F)(F)F  | 5  | LATS1       | LATS1    | > | 10000 |
| UNC10225225A | Cc1c(C)n2c(nc(cc2=O)N2CCOCC2)n1Cc1cccc(c1C)C(F)(F)F  | 5  | PIK3CB      | PIK3CB   | = | 16    |
| UNC10225225A | Cc1c(C)n2c(nc(cc2=O)N2CCOCC2)n1Cc1cccc(c1C)C(F)(F)F  | 5  | PIK3CD      | PIK3CD   | = | 620   |
| UNC10225225A | Cc1c(C)n2c(nc(cc2=O)N2CCOCC2)n1Cc1cccc(c1C)C(F)(F)F  | 5  | PLK2        | PLK2     | > | 10000 |
| UNC10225225A | Cc1c(C)n2c(nc(cc2=O)N2CCOCC2)n1Cc1cccc(c1C)C(F)(F)F  | 5  | PRKG2       | PRKG2    | > | 10000 |

|              |                                                                                                      |    |            |         |   |       |
|--------------|------------------------------------------------------------------------------------------------------|----|------------|---------|---|-------|
| UNC10225227A | OC(=O)C(F)(F)F.OC(=O)C(F)(F)F.OC(=O)C(F)(F)F.Cc1cc(C)cc(Oc2nccc(n2)-c2c(ncn2C2CCNCC2)-c2ccc(F)cc2)c1 | 4  | CIT        | CIT     | = | 410   |
| UNC10225227A | OC(=O)C(F)(F)F.OC(=O)C(F)(F)F.OC(=O)C(F)(F)F.Cc1cc(C)cc(Oc2nccc(n2)-c2c(ncn2C2CCNCC2)-c2ccc(F)cc2)c1 | 4  | CSNK1D     | CSNK1D  | = | 160   |
| UNC10225227A | OC(=O)C(F)(F)F.OC(=O)C(F)(F)F.OC(=O)C(F)(F)F.Cc1cc(C)cc(Oc2nccc(n2)-c2c(ncn2C2CCNCC2)-c2ccc(F)cc2)c1 | 4  | ERBB2      | ERBB2   | = | 250   |
| UNC10225227A | OC(=O)C(F)(F)F.OC(=O)C(F)(F)F.OC(=O)C(F)(F)F.Cc1cc(C)cc(Oc2nccc(n2)-c2c(ncn2C2CCNCC2)-c2ccc(F)cc2)c1 | 4  | JAK1(JH1do | JAK1    | > | 10000 |
| UNC10225227A | OC(=O)C(F)(F)F.OC(=O)C(F)(F)F.OC(=O)C(F)(F)F.Cc1cc(C)cc(Oc2nccc(n2)-c2c(ncn2C2CCNCC2)-c2ccc(F)cc2)c1 | 4  | p38-alpha  | MAPK14  | = | 38    |
| UNC10225227A | OC(=O)C(F)(F)F.OC(=O)C(F)(F)F.OC(=O)C(F)(F)F.Cc1cc(C)cc(Oc2nccc(n2)-c2c(ncn2C2CCNCC2)-c2ccc(F)cc2)c1 | 4  | PIM1       | PIM1    | > | 10000 |
| UNC10225227A | OC(=O)C(F)(F)F.OC(=O)C(F)(F)F.OC(=O)C(F)(F)F.Cc1cc(C)cc(Oc2nccc(n2)-c2c(ncn2C2CCNCC2)-c2ccc(F)cc2)c1 | 4  | PRKCI      | PRKCI   | > | 10000 |
| UNC10225227A | OC(=O)C(F)(F)F.OC(=O)C(F)(F)F.OC(=O)C(F)(F)F.Cc1cc(C)cc(Oc2nccc(n2)-c2c(ncn2C2CCNCC2)-c2ccc(F)cc2)c1 | 4  | YANK2      | STK32B  | = | 160   |
| UNC10225229A | COCCNC(=O)c1ccc(cc1)-c1cc(cc(F)c1C)C(=O)NC1CC1                                                       | 2  | p38-alpha  | MAPK14  | = | 7.3   |
| UNC10225229A | COCCNC(=O)c1ccc(cc1)-c1cc(cc(F)c1C)C(=O)NC1CC1                                                       | 2  | p38-beta   | MAPK11  | = | 88    |
| UNC10225230A | O=C(N1CCCC1)c1ccc(cc1)-c1cc(ccn1)-c1c[nH]nc1-c1cccn1                                                 | 4  | DAPK3      | DAPK3   | > | 10000 |
| UNC10225230A | O=C(N1CCCC1)c1ccc(cc1)-c1cc(ccn1)-c1c[nH]nc1-c1cccn1                                                 | 4  | PIM1       | PIM1    | > | 10000 |
| UNC10225230A | O=C(N1CCCC1)c1ccc(cc1)-c1cc(ccn1)-c1c[nH]nc1-c1cccn1                                                 | 4  | PIP5K2C    | PIP4K2C | = | 21    |
| UNC10225230A | O=C(N1CCCC1)c1ccc(cc1)-c1cc(ccn1)-c1c[nH]nc1-c1cccn1                                                 | 4  | PRKCI      | PRKCI   | > | 10000 |
| UNC10225230A | O=C(N1CCCC1)c1ccc(cc1)-c1cc(ccn1)-c1c[nH]nc1-c1cccn1                                                 | 4  | TGFBR1     | TGFBR1  | = | 170   |
| UNC10225231A | Fc1ccccc1Cn1ccn2c1nc(cc2=O)N1CCOCC1                                                                  | 4  | BRSK2      | BRSK2   | > | 10000 |
| UNC10225231A | Fc1ccccc1Cn1ccn2c1nc(cc2=O)N1CCOCC1                                                                  | 4  | GSK3A      | GSK3A   | > | 10000 |
| UNC10225231A | Fc1ccccc1Cn1ccn2c1nc(cc2=O)N1CCOCC1                                                                  | 4  | MARK1      | MARK1   | > | 10000 |
| UNC10225231A | Fc1ccccc1Cn1ccn2c1nc(cc2=O)N1CCOCC1                                                                  | 4  | PIK3CB     | PIK3CB  | = | 180   |
| UNC10225231A | Fc1ccccc1Cn1ccn2c1nc(cc2=O)N1CCOCC1                                                                  | 4  | VPS34      | PIK3C3  | = | 68    |
| UNC10225233A | Cl.COc1cc2nccc(Nc3ccc(OCc4ccc(NC(C)=O)cc4)cc3)c2cc1OC                                                | 10 | FLT1       | FLT1    | = | 680   |
| UNC10225233A | Cl.COc1cc2nccc(Nc3ccc(OCc4ccc(NC(C)=O)cc4)cc3)c2cc1OC                                                | 10 | FLT4       | FLT4    | = | 480   |
| UNC10225233A | Cl.COc1cc2nccc(Nc3ccc(OCc4ccc(NC(C)=O)cc4)cc3)c2cc1OC                                                | 10 | KIT        | KIT     | = | 7.4   |
| UNC10225233A | Cl.COc1cc2nccc(Nc3ccc(OCc4ccc(NC(C)=O)cc4)cc3)c2cc1OC                                                | 10 | MEK5       | MAP2K5  | = | 52    |
| UNC10225233A | Cl.COc1cc2nccc(Nc3ccc(OCc4ccc(NC(C)=O)cc4)cc3)c2cc1OC                                                | 10 | NEK7       | NEK7    | > | 10000 |
| UNC10225233A | Cl.COc1cc2nccc(Nc3ccc(OCc4ccc(NC(C)=O)cc4)cc3)c2cc1OC                                                | 10 | NEK9       | NEK9    | > | 10000 |
| UNC10225233A | Cl.COc1cc2nccc(Nc3ccc(OCc4ccc(NC(C)=O)cc4)cc3)c2cc1OC                                                | 10 | PDGFRA     | PDGFRA  | = | 60    |
| UNC10225233A | Cl.COc1cc2nccc(Nc3ccc(OCc4ccc(NC(C)=O)cc4)cc3)c2cc1OC                                                | 10 | PDGFRB     | PDGFRB  | = | 190   |
| UNC10225233A | Cl.COc1cc2nccc(Nc3ccc(OCc4ccc(NC(C)=O)cc4)cc3)c2cc1OC                                                | 10 | VEGFR2     | KDR     | = | 53    |
| UNC10225235A | Fc1ccc(Nc2nccc(n2)N2CCC(C2)NC(=O)Nc2ccc3OCOc3c2)c1                                                   | 2  | AURKB      | AURKB   | = | 6900  |
| UNC10225235A | Fc1ccc(Nc2nccc(n2)N2CCC(C2)NC(=O)Nc2ccc3OCOc3c2)c1                                                   | 2  | GRK3       | ADRBK2  | > | 10000 |

|              |                                                                          |    |            |         |   |       |
|--------------|--------------------------------------------------------------------------|----|------------|---------|---|-------|
| UNC10225238A | Cl.Cc1cnc(N)c(\C=C\c2cncc(c2)C(=O)NCCc2ccc(Cl)cc2Cl)c1                   | 6  | CDK11      | CDK19   | = | 410   |
| UNC10225238A | Cl.Cc1cnc(N)c(\C=C\c2cncc(c2)C(=O)NCCc2ccc(Cl)cc2Cl)c1                   | 6  | CDK8       | CDK8    | = | 1100  |
| UNC10225238A | Cl.Cc1cnc(N)c(\C=C\c2cncc(c2)C(=O)NCCc2ccc(Cl)cc2Cl)c1                   | 6  | KIT        | KIT     | = | 150   |
| UNC10225238A | Cl.Cc1cnc(N)c(\C=C\c2cncc(c2)C(=O)NCCc2ccc(Cl)cc2Cl)c1                   | 6  | PDGFRA     | PDGFRA  | = | 39    |
| UNC10225238A | Cl.Cc1cnc(N)c(\C=C\c2cncc(c2)C(=O)NCCc2ccc(Cl)cc2Cl)c1                   | 6  | PDGFRB     | PDGFRB  | = | 140   |
| UNC10225239A | Cc1cccc(n1)-c1nc(Nc2ccc3[nH]nnc3c2)c2cccc2n1                             | 2  | CSNK2A1    | CSNK2A1 | = | 770   |
| UNC10225239A | Cc1cccc(n1)-c1nc(Nc2ccc3[nH]nnc3c2)c2cccc2n1                             | 2  | PRKD1      | PRKD1   | = | 61    |
| UNC10225239A | Cc1cccc(n1)-c1nc(Nc2ccc3[nH]nnc3c2)c2cccc2n1                             | 2  | PRKD2      | PRKD2   | = | 83    |
| UNC10225240A | COC(=O)C(Cc1cccc1)NC(=O)NC1CCN(C1)c1ccnc(Nc2ccc(F)cc2)n1                 | 3  | CHEK1      | CHEK1   | > | 10000 |
| UNC10225240A | COC(=O)C(Cc1cccc1)NC(=O)NC1CCN(C1)c1ccnc(Nc2ccc(F)cc2)n1                 | 3  | GRK1       | GRK1    | > | 10000 |
| UNC10225240A | COC(=O)C(Cc1cccc1)NC(=O)NC1CCN(C1)c1ccnc(Nc2ccc(F)cc2)n1                 | 3  | PRKD3      | PRKD3   | > | 10000 |
| UNC10225240A | COC(=O)C(Cc1cccc1)NC(=O)NC1CCN(C1)c1ccnc(Nc2ccc(F)cc2)n1                 | 3  | TRKA       | NTRK1   | = | 1500  |
| UNC10225240A | COC(=O)C(Cc1cccc1)NC(=O)NC1CCN(C1)c1ccnc(Nc2ccc(F)cc2)n1                 | 3  | YSK4       | MAP3K19 | = | 1400  |
| UNC10225241A | FC(F)(F)c1ccc(cc1)-c1cc(ccn1)-c1c[nH]nc1-c1ccccn1                        | 4  | DAPK3      | DAPK3   | > | 10000 |
| UNC10225241A | FC(F)(F)c1ccc(cc1)-c1cc(ccn1)-c1c[nH]nc1-c1ccccn1                        | 4  | EIF2AK1    | EIF2AK1 | > | 10000 |
| UNC10225241A | FC(F)(F)c1ccc(cc1)-c1cc(ccn1)-c1c[nH]nc1-c1ccccn1                        | 4  | SNRK       | SNRK    | > | 10000 |
| UNC10225241A | FC(F)(F)c1ccc(cc1)-c1cc(ccn1)-c1c[nH]nc1-c1ccccn1                        | 4  | TGFBR1     | TGFBR1  | = | 220   |
| UNC10225241A | FC(F)(F)c1ccc(cc1)-c1cc(ccn1)-c1c[nH]nc1-c1ccccn1                        | 4  | YANK1      | STK32A  | > | 10000 |
| UNC10225242A | CN1C(=O)C(Nc2cccc2)=C(C1=O)c1cccc1                                       | 1  | MAST1      | MAST1   | > | 10000 |
| UNC10225243A | Cc1cccc1-c1cc(ccn1)-c1c[nH]nc1-c1ccccn1                                  | 1  | CHEK1      | CHEK1   | > | 10000 |
| UNC10225243A | Cc1cccc1-c1cc(ccn1)-c1c[nH]nc1-c1ccccn1                                  | 1  | p38-alpha  | MAPK14  | = | 130   |
| UNC10225243A | Cc1cccc1-c1cc(ccn1)-c1c[nH]nc1-c1ccccn1                                  | 1  | PRKD3      | PRKD3   | > | 10000 |
| UNC10225244A | COc1ccc(cc1)C1=C(Nc2cccc(c2)C(O)=O)C(=O)NC1=O                            | 2  | ACVR1      | ACVR1   | > | 10000 |
| UNC10225244A | COc1ccc(cc1)C1=C(Nc2cccc(c2)C(O)=O)C(=O)NC1=O                            | 2  | LIMK1      | LIMK1   | > | 10000 |
| UNC10225245A | OC(=O)C(F)(F)COC1ccc(cc1)S(=O)(=O)NC1CCN(CC1)c1cc(C)nc(Nc2cccc(c2)C#N)n1 | 3  | PIK3CB     | PIK3CB  | > | 10000 |
| UNC10225247A | CCCCc1nn2ncccc2c1-c1ccnc(NC2CC2)n1                                       | 4  | BUB1       | BUB1    | = | 3300  |
| UNC10225247A | CCCCc1nn2ncccc2c1-c1ccnc(NC2CC2)n1                                       | 4  | CLK3       | CLK3    | > | 10000 |
| UNC10225247A | CCCCc1nn2ncccc2c1-c1ccnc(NC2CC2)n1                                       | 4  | CSNK1D     | CSNK1D  | = | 480   |
| UNC10225247A | CCCCc1nn2ncccc2c1-c1ccnc(NC2CC2)n1                                       | 4  | CSNK1E     | CSNK1E  | = | 2900  |
| UNC10225247A | CCCCc1nn2ncccc2c1-c1ccnc(NC2CC2)n1                                       | 4  | JNK2       | MAPK9   | = | 1300  |
| UNC10225247A | CCCCc1nn2ncccc2c1-c1ccnc(NC2CC2)n1                                       | 4  | JNK3       | MAPK10  | = | 740   |
| UNC10225251A | Cl.C(N1CCOCC1)c1ccc(cc1)-c1cc(ccn1)-c1c[nH]nc1-c1ccccn1                  | 1  | ACVR1B     | ACVR1B  | = | 180   |
| UNC10225251A | Cl.C(N1CCOCC1)c1ccc(cc1)-c1cc(ccn1)-c1c[nH]nc1-c1ccccn1                  | 1  | TGFBR1     | TGFBR1  | = | 150   |
| UNC10225251A | Cl.C(N1CCOCC1)c1ccc(cc1)-c1cc(ccn1)-c1c[nH]nc1-c1ccccn1                  | 1  | TGFBR2     | TGFBR2  | = | 210   |
| UNC10225252A | Oc1ccc(NC2=C(C(=O)NC2=O)c2ccc(Cl)cc2)cc1Cl                               | 0  | PCK2       | CDK17   | > | 10000 |
| UNC10225255A | Clc1cccc1C1=C(N2CCc3cccc23)C(=O)NC1=O                                    | 10 | ABL1-phosp | ABL1    | > | 10000 |
| UNC10225255A | Clc1cccc1C1=C(N2CCc3cccc23)C(=O)NC1=O                                    | 10 | BMPR2      | BMPR2   | > | 10000 |
| UNC10225255A | Clc1cccc1C1=C(N2CCc3cccc23)C(=O)NC1=O                                    | 10 | HASPIN     | GSG2    | > | 10000 |
| UNC10225255A | Clc1cccc1C1=C(N2CCc3cccc23)C(=O)NC1=O                                    | 10 | IKK-alpha  | CHUK    | > | 10000 |
| UNC10225255A | Clc1cccc1C1=C(N2CCc3cccc23)C(=O)NC1=O                                    | 10 | LTK        | LTK     | > | 10000 |
| UNC10225255A | Clc1cccc1C1=C(N2CCc3cccc23)C(=O)NC1=O                                    | 10 | MST1       | STK4    | > | 10000 |



|              |                                                            |    |              |         |   |       |
|--------------|------------------------------------------------------------|----|--------------|---------|---|-------|
| UNC10225255A | Clc1ccccc1C1=C(N2CCc3ccccc23)C(=O)NC1=O                    | 10 | PAK3         | PAK3    | > | 10000 |
| UNC10225255A | Clc1ccccc1C1=C(N2CCc3ccccc23)C(=O)NC1=O                    | 10 | SRMS         | SRMS    | > | 10000 |
| UNC10225255A | Clc1ccccc1C1=C(N2CCc3ccccc23)C(=O)NC1=O                    | 10 | TAOK2        | TAOK2   | > | 10000 |
| UNC10225256A | Cl.CI.CN(C)CCN(C)C(=O)c1cc(c(o1)-c1ccc(Cl)c(O)c1)-c1ccncc1 | 5  | BRAF         | BRAF    | = | 45    |
| UNC10225256A | Cl.CI.CN(C)CCN(C)C(=O)c1cc(c(o1)-c1ccc(Cl)c(O)c1)-c1ccncc1 | 5  | BUB1         | BUB1    | = | 390   |
| UNC10225256A | Cl.CI.CN(C)CCN(C)C(=O)c1cc(c(o1)-c1ccc(Cl)c(O)c1)-c1ccncc1 | 5  | CSNK1D       | CSNK1D  | = | 220   |
| UNC10225256A | Cl.CI.CN(C)CCN(C)C(=O)c1cc(c(o1)-c1ccc(Cl)c(O)c1)-c1ccncc1 | 5  | CSNK1E       | CSNK1E  | = | 410   |
| UNC10225256A | Cl.CI.CN(C)CCN(C)C(=O)c1cc(c(o1)-c1ccc(Cl)c(O)c1)-c1ccncc1 | 5  | p38-alpha    | MAPK14  | = | 740   |
| UNC10225256A | Cl.CI.CN(C)CCN(C)C(=O)c1cc(c(o1)-c1ccc(Cl)c(O)c1)-c1ccncc1 | 5  | RAF1         | RAF1    | = | 650   |
| UNC10225256A | Cl.CI.CN(C)CCN(C)C(=O)c1cc(c(o1)-c1ccc(Cl)c(O)c1)-c1ccncc1 | 5  | SLK          | SLK     | = | 3600  |
| UNC10225258A | CC(C)N1CCC(CC1)n1cnc(c1-c1ccnc(N)n1)-c1ccc(F)cc1           | 5  | CSNK1A1      | CSNK1A1 | = | 59    |
| UNC10225258A | CC(C)N1CCC(CC1)n1cnc(c1-c1ccnc(N)n1)-c1ccc(F)cc1           | 5  | CSNK1D       | CSNK1D  | = | 39    |
| UNC10225258A | CC(C)N1CCC(CC1)n1cnc(c1-c1ccnc(N)n1)-c1ccc(F)cc1           | 5  | CSNK1E       | CSNK1E  | = | 230   |
| UNC10225258A | CC(C)N1CCC(CC1)n1cnc(c1-c1ccnc(N)n1)-c1ccc(F)cc1           | 5  | p38-alpha    | MAPK14  | = | 160   |
| UNC10225258A | CC(C)N1CCC(CC1)n1cnc(c1-c1ccnc(N)n1)-c1ccc(F)cc1           | 5  | TIE2         | TEK     | > | 10000 |
| UNC10225259A | Brc1cc2c(NC(=O)C3CC3)n[nH]c2nc1-c1ccccc1                   | 6  | ERK5         | MAPK7   | > | 10000 |
| UNC10225259A | Brc1cc2c(NC(=O)C3CC3)n[nH]c2nc1-c1ccccc1                   | 6  | GSK3A        | GSK3A   | = | 410   |
| UNC10225259A | Brc1cc2c(NC(=O)C3CC3)n[nH]c2nc1-c1ccccc1                   | 6  | MST1R        | MST1R   | > | 10000 |
| UNC10225259A | Brc1cc2c(NC(=O)C3CC3)n[nH]c2nc1-c1ccccc1                   | 6  | MYLK2        | MYLK2   | = | 60    |
| UNC10225259A | Brc1cc2c(NC(=O)C3CC3)n[nH]c2nc1-c1ccccc1                   | 6  | PDGFRB       | PDGFRB  | = | 230   |
| UNC10225259A | Brc1cc2c(NC(=O)C3CC3)n[nH]c2nc1-c1ccccc1                   | 6  | YSK4         | MAP3K19 | = | 640   |
| UNC10225260A | NC(=O)c1sc(cc1OCc1ccccc1F)-n1cnc2ccccc12                   | 9  | EGFR         | EGFR    | = | 1300  |
| UNC10225260A | NC(=O)c1sc(cc1OCc1ccccc1F)-n1cnc2ccccc12                   | 9  | p38-alpha    | MAPK14  | = | 280   |
| UNC10225260A | NC(=O)c1sc(cc1OCc1ccccc1F)-n1cnc2ccccc12                   | 9  | PLK1         | PLK1    | = | 9.6   |
| UNC10225260A | NC(=O)c1sc(cc1OCc1ccccc1F)-n1cnc2ccccc12                   | 9  | PLK2         | PLK2    | = | 25    |
| UNC10225260A | NC(=O)c1sc(cc1OCc1ccccc1F)-n1cnc2ccccc12                   | 9  | PLK3         | PLK3    | = | 52    |
| UNC10225260A | NC(=O)c1sc(cc1OCc1ccccc1F)-n1cnc2ccccc12                   | 9  | ROCK1        | ROCK1   | = | 460   |
| UNC10225260A | NC(=O)c1sc(cc1OCc1ccccc1F)-n1cnc2ccccc12                   | 9  | ROCK2        | ROCK2   | = | 470   |
| UNC10225260A | NC(=O)c1sc(cc1OCc1ccccc1F)-n1cnc2ccccc12                   | 9  | RSK4(Kin.Dc) | RPS6KA6 | = | 670   |
| UNC10225261A | Cl.COC1cc2ncnc(Nc3ccc(OCc4ccccc4Br)c(Cl)c3)c2cc1OC         | 17 | EGFR         | EGFR    | = | 2.4   |
| UNC10225261A | Cl.COC1cc2ncnc(Nc3ccc(OCc4ccccc4Br)c(Cl)c3)c2cc1OC         | 17 | ERBB2        | ERBB2   | = | 17    |
| UNC10225261A | Cl.COC1cc2ncnc(Nc3ccc(OCc4ccccc4Br)c(Cl)c3)c2cc1OC         | 17 | ERBB4        | ERBB4   | = | 27    |
| UNC10225261A | Cl.COC1cc2ncnc(Nc3ccc(OCc4ccccc4Br)c(Cl)c3)c2cc1OC         | 17 | LOK          | STK10   | = | 2000  |
| UNC10225261A | Cl.COC1cc2ncnc(Nc3ccc(OCc4ccccc4Br)c(Cl)c3)c2cc1OC         | 17 | MEK5         | MAP2K5  | = | 98    |
| UNC10225261A | Cl.COC1cc2ncnc(Nc3ccc(OCc4ccccc4Br)c(Cl)c3)c2cc1OC         | 17 | PKN1         | PKN1    | > | 10000 |
| UNC10225261A | Cl.COC1cc2ncnc(Nc3ccc(OCc4ccccc4Br)c(Cl)c3)c2cc1OC         | 17 | PRKCQ        | PRKCQ   | > | 10000 |
| UNC10225261A | Cl.COC1cc2ncnc(Nc3ccc(OCc4ccccc4Br)c(Cl)c3)c2cc1OC         | 17 | RIPK2        | RIPK2   | = | 410   |
| UNC10225261A | Cl.COC1cc2ncnc(Nc3ccc(OCc4ccccc4Br)c(Cl)c3)c2cc1OC         | 17 | RSK3(Kin.Dc) | RPS6KA2 | > | 10000 |
| UNC10225261A | Cl.COC1cc2ncnc(Nc3ccc(OCc4ccccc4Br)c(Cl)c3)c2cc1OC         | 17 | SLK          | SLK     | = | 9300  |
| UNC10225263A | Cc1ccc(NC(=O)c2cccc(c2)C#N)cc1-c1ccc(cc1)C(=O)Nc1ccncc1    | 8  | CSF1R        | CSF1R   | = | 780   |
| UNC10225263A | Cc1ccc(NC(=O)c2cccc(c2)C#N)cc1-c1ccc(cc1)C(=O)Nc1ccncc1    | 8  | DDR1         | DDR1    | = | 22    |
| UNC10225263A | Cc1ccc(NC(=O)c2cccc(c2)C#N)cc1-c1ccc(cc1)C(=O)Nc1ccncc1    | 8  | DDR2         | DDR2    | = | 140   |
| UNC10225263A | Cc1ccc(NC(=O)c2cccc(c2)C#N)cc1-c1ccc(cc1)C(=O)Nc1ccncc1    | 8  | ERK5         | MAPK7   | > | 10000 |

|              |                                                            |    |            |         |   |       |
|--------------|------------------------------------------------------------|----|------------|---------|---|-------|
| UNC10225263A | Cc1ccc(NC(=O)c2cccc(c2)C#N)cc1-c1ccc(cc1)C(=O)Nc1cncc1     | 8  | FRK        | FRK     | = | 190   |
| UNC10225263A | Cc1ccc(NC(=O)c2cccc(c2)C#N)cc1-c1ccc(cc1)C(=O)Nc1cncc1     | 8  | KIT        | KIT     | = | 310   |
| UNC10225263A | Cc1ccc(NC(=O)c2cccc(c2)C#N)cc1-c1ccc(cc1)C(=O)Nc1cncc1     | 8  | LCK        | LCK     | = | 560   |
| UNC10225263A | Cc1ccc(NC(=O)c2cccc(c2)C#N)cc1-c1ccc(cc1)C(=O)Nc1cncc1     | 8  | PDGFRA     | PDGFRA  | = | 170   |
| UNC10225263A | Cc1ccc(NC(=O)c2cccc(c2)C#N)cc1-c1ccc(cc1)C(=O)Nc1cncc1     | 8  | PDGFRB     | PDGFRB  | = | 13    |
| UNC10225267A | COc1cccc(c1)C1=C(Nc2cc(Cl)c(O)c(Cl)c2)C(=O)NC1=O           | 10 | CHEK1      | CHEK1   | > | 10000 |
| UNC10225267A | COc1cccc(c1)C1=C(Nc2cc(Cl)c(O)c(Cl)c2)C(=O)NC1=O           | 10 | CSNK1G1    | CSNK1G1 | > | 10000 |
| UNC10225267A | COc1cccc(c1)C1=C(Nc2cc(Cl)c(O)c(Cl)c2)C(=O)NC1=O           | 10 | DDR1       | DDR1    | > | 10000 |
| UNC10225267A | COc1cccc(c1)C1=C(Nc2cc(Cl)c(O)c(Cl)c2)C(=O)NC1=O           | 10 | GAK        | GAK     | > | 10000 |
| UNC10225267A | COc1cccc(c1)C1=C(Nc2cc(Cl)c(O)c(Cl)c2)C(=O)NC1=O           | 10 | JAK3(JH1do | JAK3    | = | 120   |
| UNC10225267A | COc1cccc(c1)C1=C(Nc2cc(Cl)c(O)c(Cl)c2)C(=O)NC1=O           | 10 | LTK        | LTK     | > | 10000 |
| UNC10225267A | COc1cccc(c1)C1=C(Nc2cc(Cl)c(O)c(Cl)c2)C(=O)NC1=O           | 10 | MST1       | STK4    | = | 1800  |
| UNC10225267A | COc1cccc(c1)C1=C(Nc2cc(Cl)c(O)c(Cl)c2)C(=O)NC1=O           | 10 | NEK2       | NEK2    | > | 10000 |
| UNC10225267A | COc1cccc(c1)C1=C(Nc2cc(Cl)c(O)c(Cl)c2)C(=O)NC1=O           | 10 | PAK3       | PAK3    | > | 10000 |
| UNC10225267A | COc1cccc(c1)C1=C(Nc2cc(Cl)c(O)c(Cl)c2)C(=O)NC1=O           | 10 | PRKD3      | PRKD3   | > | 10000 |
| UNC10225268A | Cl.NC(=O)c1cccc(Nc2nccc(Nc3ccc(Oc4cccc(Cl)c4)c(Cl)c3)n2)c1 | 5  | BLK        | BLK     | = | 2600  |
| UNC10225268A | Cl.NC(=O)c1cccc(Nc2nccc(Nc3ccc(Oc4cccc(Cl)c4)c(Cl)c3)n2)c1 | 5  | EGFR       | EGFR    | = | 120   |
| UNC10225268A | Cl.NC(=O)c1cccc(Nc2nccc(Nc3ccc(Oc4cccc(Cl)c4)c(Cl)c3)n2)c1 | 5  | ERBB3      | ERBB3   | = | 260   |
| UNC10225268A | Cl.NC(=O)c1cccc(Nc2nccc(Nc3ccc(Oc4cccc(Cl)c4)c(Cl)c3)n2)c1 | 5  | ICK        | ICK     | > | 10000 |
| UNC10225268A | Cl.NC(=O)c1cccc(Nc2nccc(Nc3ccc(Oc4cccc(Cl)c4)c(Cl)c3)n2)c1 | 5  | JAK2(JH1do | JAK2    | = | 400   |
| UNC10225268A | Cl.NC(=O)c1cccc(Nc2nccc(Nc3ccc(Oc4cccc(Cl)c4)c(Cl)c3)n2)c1 | 5  | MEK5       | MAP2K5  | = | 34    |
| UNC10225268A | Cl.NC(=O)c1cccc(Nc2nccc(Nc3ccc(Oc4cccc(Cl)c4)c(Cl)c3)n2)c1 | 5  | PIK4CB     | PI4KB   | > | 10000 |
| UNC10225268A | Cl.NC(=O)c1cccc(Nc2nccc(Nc3ccc(Oc4cccc(Cl)c4)c(Cl)c3)n2)c1 | 5  | RIPK2      | RIPK2   | = | 44    |
| UNC10225270A | Cc1ccc(cc1-c1ccc(cc1)C(=O)NCC1CC1)C(=O)NC1CCCC1            | 2  | AMPK-alpha | PRKAA2  | > | 10000 |
| UNC10225270A | Cc1ccc(cc1-c1ccc(cc1)C(=O)NCC1CC1)C(=O)NC1CCCC1            | 2  | EGFR       | EGFR    | > | 10000 |
| UNC10225271A | COc1cc2c(Nc3cccc(NC(=O)c4cccc4)c3)ncnc2cc1OCCCN1CCOCC1     | 9  | CSF1R      | CSF1R   | = | 420   |
| UNC10225271A | COc1cc2c(Nc3cccc(NC(=O)c4cccc4)c3)ncnc2cc1OCCCN1CCOCC1     | 9  | EGFR       | EGFR    | = | 1400  |
| UNC10225271A | COc1cc2c(Nc3cccc(NC(=O)c4cccc4)c3)ncnc2cc1OCCCN1CCOCC1     | 9  | KIT        | KIT     | = | 300   |
| UNC10225271A | COc1cc2c(Nc3cccc(NC(=O)c4cccc4)c3)ncnc2cc1OCCCN1CCOCC1     | 9  | LCK        | LCK     | = | 390   |
| UNC10225271A | COc1cc2c(Nc3cccc(NC(=O)c4cccc4)c3)ncnc2cc1OCCCN1CCOCC1     | 9  | LYN        | LYN     | = | 130   |
| UNC10225271A | COc1cc2c(Nc3cccc(NC(=O)c4cccc4)c3)ncnc2cc1OCCCN1CCOCC1     | 9  | MEK5       | MAP2K5  | = | 940   |
| UNC10225271A | COc1cc2c(Nc3cccc(NC(=O)c4cccc4)c3)ncnc2cc1OCCCN1CCOCC1     | 9  | p38-alpha  | MAPK14  | = | 440   |
| UNC10225271A | COc1cc2c(Nc3cccc(NC(=O)c4cccc4)c3)ncnc2cc1OCCCN1CCOCC1     | 9  | p38-beta   | MAPK11  | = | 100   |

|              |                                                                         |    |            |         |   |       |
|--------------|-------------------------------------------------------------------------|----|------------|---------|---|-------|
| UNC10225271A | COc1cc2c(Nc3cccc(NC(=O)c4cccc4)c3)ncnc2cc1OCCCN1<br>CCOCC1              | 9  | PDGFRB     | PDGFRB  | = | 560   |
| UNC10225271A | COc1cc2c(Nc3cccc(NC(=O)c4cccc4)c3)ncnc2cc1OCCCN1<br>CCOCC1              | 9  | PDPK1      | PDPK1   | > | 10000 |
| UNC10225271A | COc1cc2c(Nc3cccc(NC(=O)c4cccc4)c3)ncnc2cc1OCCCN1<br>CCOCC1              | 9  | PKAC-alpha | PRKACA  | > | 10000 |
| UNC10225271A | COc1cc2c(Nc3cccc(NC(=O)c4cccc4)c3)ncnc2cc1OCCCN1<br>CCOCC1              | 9  | RET        | RET     | = | 110   |
| UNC10225271A | COc1cc2c(Nc3cccc(NC(=O)c4cccc4)c3)ncnc2cc1OCCCN1<br>CCOCC1              | 9  | SRC        | SRC     | = | 4800  |
| UNC10225274A | CNc1nccc(n1)-c1c(ncn1C1CCN(C)CC1)-c1ccc(F)cc1                           | 4  | CSNK1A1    | CSNK1A1 | = | 24    |
| UNC10225274A | CNc1nccc(n1)-c1c(ncn1C1CCN(C)CC1)-c1ccc(F)cc1                           | 4  | CSNK1D     | CSNK1D  | = | 5.7   |
| UNC10225274A | CNc1nccc(n1)-c1c(ncn1C1CCN(C)CC1)-c1ccc(F)cc1                           | 4  | CSNK1E     | CSNK1E  | = | 17    |
| UNC10225274A | CNc1nccc(n1)-c1c(ncn1C1CCN(C)CC1)-c1ccc(F)cc1                           | 4  | GRK2       | ADRBK1  | > | 10000 |
| UNC10225274A | CNc1nccc(n1)-c1c(ncn1C1CCN(C)CC1)-c1ccc(F)cc1                           | 4  | NLK        | NLK     | = | 130   |
| UNC10225274A | CNc1nccc(n1)-c1c(ncn1C1CCN(C)CC1)-c1ccc(F)cc1                           | 4  | p38-alpha  | MAPK14  | = | 53    |
| UNC10225274A | CNc1nccc(n1)-c1c(ncn1C1CCN(C)CC1)-c1ccc(F)cc1                           | 4  | PIP5K2C    | PIP4K2C | = | 39    |
| UNC10225278A | COc1ccc(Nc2nccc(n2)N2CCC(C2)NC(=O)c2cccc(NC(C)=O)c<br>2)cc1             | 1  | DYRK1B     | DYRK1B  | > | 10000 |
| UNC10225278A | COc1ccc(Nc2nccc(n2)N2CCC(C2)NC(=O)c2cccc(NC(C)=O)c<br>2)cc1             | 1  | WNK4       | WNK4    | > | 10000 |
| UNC10225279B | Cl.CS(=O)(=O)CCNCc1nc(cs1)-<br>c1ccc2ncnc(Nc3ccc(OCc4cccc4)c(Cl)c3)c2c1 | 17 | CHEK1      | CHEK1   | > | 10000 |
| UNC10225279B | Cl.CS(=O)(=O)CCNCc1nc(cs1)-<br>c1ccc2ncnc(Nc3ccc(OCc4cccc4)c(Cl)c3)c2c1 | 17 | DDR1       | DDR1    | > | 10000 |
| UNC10225279B | Cl.CS(=O)(=O)CCNCc1nc(cs1)-<br>c1ccc2ncnc(Nc3ccc(OCc4cccc4)c(Cl)c3)c2c1 | 17 | EGFR       | EGFR    | = | 1.4   |
| UNC10225279B | Cl.CS(=O)(=O)CCNCc1nc(cs1)-<br>c1ccc2ncnc(Nc3ccc(OCc4cccc4)c(Cl)c3)c2c1 | 17 | ERBB2      | ERBB2   | = | 4     |
| UNC10225279B | Cl.CS(=O)(=O)CCNCc1nc(cs1)-<br>c1ccc2ncnc(Nc3ccc(OCc4cccc4)c(Cl)c3)c2c1 | 17 | ERBB4      | ERBB4   | = | 69    |
| UNC10225279B | Cl.CS(=O)(=O)CCNCc1nc(cs1)-<br>c1ccc2ncnc(Nc3ccc(OCc4cccc4)c(Cl)c3)c2c1 | 17 | GRK3       | ADRBK2  | > | 10000 |
| UNC10225279B | Cl.CS(=O)(=O)CCNCc1nc(cs1)-<br>c1ccc2ncnc(Nc3ccc(OCc4cccc4)c(Cl)c3)c2c1 | 17 | MEK5       | MAP2K5  | = | 700   |
| UNC10225279B | Cl.CS(=O)(=O)CCNCc1nc(cs1)-<br>c1ccc2ncnc(Nc3ccc(OCc4cccc4)c(Cl)c3)c2c1 | 17 | MLCK       | MYLK3   | > | 10000 |
| UNC10225279B | Cl.CS(=O)(=O)CCNCc1nc(cs1)-<br>c1ccc2ncnc(Nc3ccc(OCc4cccc4)c(Cl)c3)c2c1 | 17 | PRKD3      | PRKD3   | > | 10000 |
| UNC10225285A | Cc1nnc(o1)-c1ccc(C)c(c1)-<br>c1ccc(cc1)C(=O)Nc1ccc(NS(C)(=O)=O)cc1      | 1  | p38-alpha  | MAPK14  | = | 140   |
| UNC10225286A | CSc1ccc(NC2=C(C(=O)NC2=O)c2cccc(Cl)c2)cc1                               | 2  | BUB1       | BUB1    | > | 10000 |
| UNC10225286A | CSc1ccc(NC2=C(C(=O)NC2=O)c2cccc(Cl)c2)cc1                               | 2  | PIP5K1A    | PIP5K1A | > | 10000 |
| UNC10225287A | C[C@@H](O)c1cc(sc1C(N)=O)-<br>n1cnc2ccc(NC(=O)NC(C)(C)C)cc12)c1cccc1Cl  | 2  | PLK1       | PLK1    | = | 7.3   |
| UNC10225287A | C[C@@H](O)c1cc(sc1C(N)=O)-<br>n1cnc2ccc(NC(=O)NC(C)(C)C)cc12)c1cccc1Cl  | 2  | PLK2       | PLK2    | = | 77    |
| UNC10225287A | C[C@@H](O)c1cc(sc1C(N)=O)-<br>n1cnc2ccc(NC(=O)NC(C)(C)C)cc12)c1cccc1Cl  | 2  | PLK3       | PLK3    | = | 150   |
| UNC10225289A | c1[nH]nc(c1-c1ccnc2cccc12)-c1ccccn1                                     | 1  | TGFBR1     | TGFBR1  | = | 110   |
| UNC10225291A | COc1ccc2cc(c2c1)-c1nc([nH]c1-c1ccnc1)-<br>c1cccc1C(C)C                  | 3  | BUB1       | BUB1    | = | 470   |
| UNC10225291A | COc1ccc2cc(c2c1)-c1nc([nH]c1-c1ccnc1)-<br>c1cccc1C(C)C                  | 3  | DDR1       | DDR1    | = | 330   |

|              |                                                                     |   |             |         |   |       |
|--------------|---------------------------------------------------------------------|---|-------------|---------|---|-------|
| UNC10225291A | COc1ccc2cc(ccc2c1)-c1nc([nH]c1-c1ccncc1)-c1cccc1C(C)C               | 3 | JAK2(JH1do  | JAK2    | > | 10000 |
| UNC10225291A | COc1ccc2cc(ccc2c1)-c1nc([nH]c1-c1ccncc1)-c1cccc1C(C)C               | 3 | TGFBR1      | TGFBR1  | = | 770   |
| UNC10225291A | COc1ccc2cc(ccc2c1)-c1nc([nH]c1-c1ccncc1)-c1cccc1C(C)C               | 3 | TIE2        | TEK     | = | 160   |
| UNC10225292A | Fc1cccc1-c1ccc2c(NC(=O)C3CC3)n[nH]c2c1                              | 2 | MYLK2       | MYLK2   | = | 110   |
| UNC10225292A | Fc1cccc1-c1ccc2c(NC(=O)C3CC3)n[nH]c2c1                              | 2 | YSK4        | MAP3K19 | = | 200   |
| UNC10225293A | COc1cccc(c1)C1=C(N(C)c2cccc2)C(=O)NC1=O                             | 2 | NIK         | MAP3K14 | > | 10000 |
| UNC10225294A | COc1cccc1CNC(=O)c1cc(c[nH]1)C(=O)c1cccc1C                           | 5 | AURKA       | AURKA   | > | 10000 |
| UNC10225294A | COc1cccc1CNC(=O)c1cc(c[nH]1)C(=O)c1cccc1C                           | 5 | BRK2        | BRK2    | > | 10000 |
| UNC10225294A | COc1cccc1CNC(=O)c1cc(c[nH]1)C(=O)c1cccc1C                           | 5 | CSNK2A2     | CSNK2A2 | = | 5100  |
| UNC10225294A | COc1cccc1CNC(=O)c1cc(c[nH]1)C(=O)c1cccc1C                           | 5 | MARK1       | MARK1   | > | 10000 |
| UNC10225294A | COc1cccc1CNC(=O)c1cc(c[nH]1)C(=O)c1cccc1C                           | 5 | p38-alpha   | MAPK14  | = | 270   |
| UNC10225294A | COc1cccc1CNC(=O)c1cc(c[nH]1)C(=O)c1cccc1C                           | 5 | PLK4        | PLK4    | > | 10000 |
| UNC10225298A | NS(=O)(=O)c1cccc(N\C=C2/C(=O)Nc3ccc(cc23)S(=O)(=O)C2c(Cl)cccc2Cl)c1 | 5 | CDKL1       | CDKL1   | > | 10000 |
| UNC10225298A | NS(=O)(=O)c1cccc(N\C=C2/C(=O)Nc3ccc(cc23)S(=O)(=O)C2c(Cl)cccc2Cl)c1 | 5 | DAPK1       | DAPK1   | > | 10000 |
| UNC10225298A | NS(=O)(=O)c1cccc(N\C=C2/C(=O)Nc3ccc(cc23)S(=O)(=O)C2c(Cl)cccc2Cl)c1 | 5 | MINK        | MINK1   | = | 790   |
| UNC10225298A | NS(=O)(=O)c1cccc(N\C=C2/C(=O)Nc3ccc(cc23)S(=O)(=O)C2c(Cl)cccc2Cl)c1 | 5 | PIK4CB      | PI4KB   | = | 1200  |
| UNC10225298A | NS(=O)(=O)c1cccc(N\C=C2/C(=O)Nc3ccc(cc23)S(=O)(=O)C2c(Cl)cccc2Cl)c1 | 5 | PRKG2       | PRKG2   | > | 10000 |
| UNC10225298A | NS(=O)(=O)c1cccc(N\C=C2/C(=O)Nc3ccc(cc23)S(=O)(=O)C2c(Cl)cccc2Cl)c1 | 5 | RSK1(Kin.Dc | RPS6KA1 | > | 10000 |
| UNC10225298A | NS(=O)(=O)c1cccc(N\C=C2/C(=O)Nc3ccc(cc23)S(=O)(=O)C2c(Cl)cccc2Cl)c1 | 5 | TNIK        | TNIK    | = | 330   |
| UNC10225300A | Fc1cccc(-c2ccc3c(NC(=O)C4CC4)n[nH]c3c2)c1F                          | 6 | AAK1        | AAK1    | = | 2100  |
| UNC10225300A | Fc1cccc(-c2ccc3c(NC(=O)C4CC4)n[nH]c3c2)c1F                          | 6 | CAMK1G      | CAMK1G  | > | 10000 |
| UNC10225300A | Fc1cccc(-c2ccc3c(NC(=O)C4CC4)n[nH]c3c2)c1F                          | 6 | CDK8        | CDK8    | > | 10000 |
| UNC10225300A | Fc1cccc(-c2ccc3c(NC(=O)C4CC4)n[nH]c3c2)c1F                          | 6 | CDKL2       | CDKL2   | = | 300   |
| UNC10225300A | Fc1cccc(-c2ccc3c(NC(=O)C4CC4)n[nH]c3c2)c1F                          | 6 | LZK         | MAP3K13 | > | 10000 |
| UNC10225300A | Fc1cccc(-c2ccc3c(NC(=O)C4CC4)n[nH]c3c2)c1F                          | 6 | MYLK2       | MYLK2   | = | 92    |
| UNC10225300A | Fc1cccc(-c2ccc3c(NC(=O)C4CC4)n[nH]c3c2)c1F                          | 6 | PIKFYVE     | PIKFYVE | > | 10000 |
| UNC10225301A | Nc1nc(c(s1)-c1ccnc2cccc12)-c1cccc1F                                 | 6 | INSR        | INSR    | > | 10000 |
| UNC10225301A | Nc1nc(c(s1)-c1ccnc2cccc12)-c1cccc1F                                 | 6 | JNK2        | MAPK9   | = | 1200  |
| UNC10225301A | Nc1nc(c(s1)-c1ccnc2cccc12)-c1cccc1F                                 | 6 | JNK3        | MAPK10  | = | 610   |
| UNC10225301A | Nc1nc(c(s1)-c1ccnc2cccc12)-c1cccc1F                                 | 6 | MINK        | MINK1   | = | 1700  |
| UNC10225301A | Nc1nc(c(s1)-c1ccnc2cccc12)-c1cccc1F                                 | 6 | p38-alpha   | MAPK14  | = | 240   |
| UNC10225301A | Nc1nc(c(s1)-c1ccnc2cccc12)-c1cccc1F                                 | 6 | RIPK2       | RIPK2   | > | 10000 |
| UNC10225301A | Nc1nc(c(s1)-c1ccnc2cccc12)-c1cccc1F                                 | 6 | RSK2(Kin.Dc | RPS6KA3 | = | 790   |
| UNC10225301A | Nc1nc(c(s1)-c1ccnc2cccc12)-c1cccc1F                                 | 6 | RSK4(Kin.Dc | RPS6KA6 | = | 28    |
| UNC10225301A | Nc1nc(c(s1)-c1ccnc2cccc12)-c1cccc1F                                 | 6 | TNNI3K      | TNNI3K  | > | 10000 |
| UNC10225302A | CCC(CC)(CC)n1cnc2c(N)ncnc12                                         | 4 | EPHA2       | EPHA2   | > | 10000 |
| UNC10225302A | CCC(CC)(CC)n1cnc2c(N)ncnc12                                         | 4 | FGFR2       | FGFR2   | > | 10000 |
| UNC10225302A | CCC(CC)(CC)n1cnc2c(N)ncnc12                                         | 4 | TNIK        | TNIK    | > | 10000 |
| UNC10225303A | COc1ccc(cc1)C1=C(Nc2cccc(Cl)c2)C(=O)NC1=O                           | 8 | ARK5        | NUAK1   | > | 10000 |
| UNC10225303A | COc1ccc(cc1)C1=C(Nc2cccc(Cl)c2)C(=O)NC1=O                           | 8 | CLK1        | CLK1    | = | 390   |
| UNC10225303A | COc1ccc(cc1)C1=C(Nc2cccc(Cl)c2)C(=O)NC1=O                           | 8 | CLK2        | CLK2    | = | 1300  |
| UNC10225303A | COc1ccc(cc1)C1=C(Nc2cccc(Cl)c2)C(=O)NC1=O                           | 8 | GCN2(Kin.D  | EIF2AK4 | > | 10000 |
| UNC10225303A | COc1ccc(cc1)C1=C(Nc2cccc(Cl)c2)C(=O)NC1=O                           | 8 | GSK3A       | GSK3A   | = | 440   |
| UNC10225303A | COc1ccc(cc1)C1=C(Nc2cccc(Cl)c2)C(=O)NC1=O                           | 8 | JAK1(JH1do  | JAK1    | > | 10000 |
| UNC10225303A | COc1ccc(cc1)C1=C(Nc2cccc(Cl)c2)C(=O)NC1=O                           | 8 | PIK3C2G     | PIK3C2G | > | 10000 |

|              |                                                                            |    |                          |         |   |       |
|--------------|----------------------------------------------------------------------------|----|--------------------------|---------|---|-------|
| UNC10225303A | COc1ccc(cc1)C1=C(Nc2cccc(Cl)c2)C(=O)NC1=O                                  | 8  | PIK3CD                   | PIK3CD  | > | 10000 |
| UNC10225303A | COc1ccc(cc1)C1=C(Nc2cccc(Cl)c2)C(=O)NC1=O                                  | 8  | SLK                      | SLK     | = | 6300  |
| UNC10225308A | COc1ccc(Nc2ncccc(n2)-<br>c2ccc(NC(=O)c3cc4cc(F)ccc4[nH]3)cc2)cc1           | 2  | CHEK1                    | CHEK1   | > | 10000 |
| UNC10225308A | COc1ccc(Nc2ncccc(n2)-<br>c2ccc(NC(=O)c3cc4cc(F)ccc4[nH]3)cc2)cc1           | 2  | PRKD3                    | PRKD3   | > | 10000 |
| UNC10225309A | Nc1nc(c(s1)-c1ccnc2ccccc12)-c1cccnc1                                       | 2  | CLK3                     | CLK3    | > | 10000 |
| UNC10225309A | Nc1nc(c(s1)-c1ccnc2ccccc12)-c1cccnc1                                       | 2  | HASPIN                   | GSG2    | = | 650   |
| UNC10225309A | Nc1nc(c(s1)-c1ccnc2ccccc12)-c1cccnc1                                       | 2  | MYLK4                    | MYLK4   | = | 490   |
| UNC10225309A | Nc1nc(c(s1)-c1ccnc2ccccc12)-c1cccnc1                                       | 2  | TNIK                     | TNIK    | > | 10000 |
| UNC10225311A | COC(=O)c1cccc(NC(=O)NCCNc2ccnc(Nc3ccc(F)cc3)n2)c1                          | 0  | DCAMKL1                  | DCLK1   | > | 10000 |
| UNC10225311A | COC(=O)c1cccc(NC(=O)NCCNc2ccnc(Nc3ccc(F)cc3)n2)c1                          | 0  | HUNK                     | HUNK    | > | 10000 |
| UNC10225319A | Fc1cccc(COc2ccc(Nc3ncnc4nn5ccccc5c34)cc2Cl)c1                              | 10 | DRAK1                    | STK17A  | > | 10000 |
| UNC10225319A | Fc1cccc(COc2ccc(Nc3ncnc4nn5ccccc5c34)cc2Cl)c1                              | 10 | EGFR                     | EGFR    | = | 1.8   |
| UNC10225319A | Fc1cccc(COc2ccc(Nc3ncnc4nn5ccccc5c34)cc2Cl)c1                              | 10 | ERBB2                    | ERBB2   | = | 24    |
| UNC10225319A | Fc1cccc(COc2ccc(Nc3ncnc4nn5ccccc5c34)cc2Cl)c1                              | 10 | ERBB4                    | ERBB4   | = | 160   |
| UNC10225322A | CC(C)c1ccc(O)cc1Nc1ccnc2ccc(cc12)C(F)(F)F                                  | 0  | CDK4-cyclin              | CDK4    | > | 10000 |
| UNC10225322A | CC(C)c1ccc(O)cc1Nc1ccnc2ccc(cc12)C(F)(F)F                                  | 0  | RIPK2                    | RIPK2   | > | 10000 |
| UNC10225322A | CC(C)c1ccc(O)cc1Nc1ccnc2ccc(cc12)C(F)(F)F                                  | 0  | ROCK1                    | ROCK1   | > | 10000 |
| UNC10225326A | O=C(Nc1n[nH]c2cc(ccc12)-c1ccsc1)C1CC1                                      | 4  | CDK4                     | CDK4    | > | 10000 |
| UNC10225326A | O=C(Nc1n[nH]c2cc(ccc12)-c1ccsc1)C1CC1                                      | 4  | CDKL2                    | CDKL2   | = | 100   |
| UNC10225326A | O=C(Nc1n[nH]c2cc(ccc12)-c1ccsc1)C1CC1                                      | 4  | ERK8                     | MAPK15  | = | 48    |
| UNC10225326A | O=C(Nc1n[nH]c2cc(ccc12)-c1ccsc1)C1CC1                                      | 4  | MYLK2                    | MYLK2   | = | 41    |
| UNC10225326A | O=C(Nc1n[nH]c2cc(ccc12)-c1ccsc1)C1CC1                                      | 4  | PDGFRB                   | PDGFRB  | = | 700   |
| UNC10225326A | O=C(Nc1n[nH]c2cc(ccc12)-c1ccsc1)C1CC1                                      | 4  | PRKD1                    | PRKD1   | > | 10000 |
| UNC10225326A | O=C(Nc1n[nH]c2cc(ccc12)-c1ccsc1)C1CC1                                      | 4  | RIOK1                    | RIOK1   | = | 180   |
| UNC10225326A | O=C(Nc1n[nH]c2cc(ccc12)-c1ccsc1)C1CC1                                      | 4  | TRKA                     | NTRK1   | = | 3100  |
| UNC10225326A | O=C(Nc1n[nH]c2cc(ccc12)-c1ccsc1)C1CC1                                      | 4  | YSK4                     | MAP3K19 | = | 120   |
| UNC10225327A | Cc1cccc(n1)-c1nc(Nc2ccnc2)c2ccccc2n1                                       | 5  | ACVR1B                   | ACVR1B  | = | 3.3   |
| UNC10225327A | Cc1cccc(n1)-c1nc(Nc2ccnc2)c2ccccc2n1                                       | 5  | CIT                      | CIT     | = | 440   |
| UNC10225327A | Cc1cccc(n1)-c1nc(Nc2ccnc2)c2ccccc2n1                                       | 5  | PRKD1                    | PRKD1   | = | 9.7   |
| UNC10225327A | Cc1cccc(n1)-c1nc(Nc2ccnc2)c2ccccc2n1                                       | 5  | PRKD2                    | PRKD2   | = | 17    |
| UNC10225327A | Cc1cccc(n1)-c1nc(Nc2ccnc2)c2ccccc2n1                                       | 5  | TGFBR1                   | TGFBR1  | = | 3.5   |
| UNC10225327A | Cc1cccc(n1)-c1nc(Nc2ccnc2)c2ccccc2n1                                       | 5  | TGFBR2                   | TGFBR2  | = | 290   |
| UNC10225329A | Cn1cncc1C(=O)NC1CCN(C1)c1ccnc(Nc2ccc(F)cc2)n1                              | 10 | CDKL1                    | CDKL1   | > | 10000 |
| UNC10225329A | Cn1cncc1C(=O)NC1CCN(C1)c1ccnc(Nc2ccc(F)cc2)n1                              | 10 | CDKL3                    | CDKL3   | > | 10000 |
| UNC10225329A | Cn1cncc1C(=O)NC1CCN(C1)c1ccnc(Nc2ccc(F)cc2)n1                              | 10 | FLT4                     | FLT4    | > | 10000 |
| UNC10225329A | Cn1cncc1C(=O)NC1CCN(C1)c1ccnc(Nc2ccc(F)cc2)n1                              | 10 | JAK2(JH1 <sup>do</sup> ) | JAK2    | = | 1500  |
| UNC10225329A | Cn1cncc1C(=O)NC1CCN(C1)c1ccnc(Nc2ccc(F)cc2)n1                              | 10 | PRKG2                    | PRKG2   | > | 10000 |
| UNC10225329A | Cn1cncc1C(=O)NC1CCN(C1)c1ccnc(Nc2ccc(F)cc2)n1                              | 10 | SRPK1                    | SRPK1   | > | 10000 |
| UNC10225329A | Cn1cncc1C(=O)NC1CCN(C1)c1ccnc(Nc2ccc(F)cc2)n1                              | 10 | TESK1                    | TESK1   | > | 10000 |
| UNC10225329A | Cn1cncc1C(=O)NC1CCN(C1)c1ccnc(Nc2ccc(F)cc2)n1                              | 10 | TXK                      | TXK     | > | 10000 |
| UNC10225329A | Cn1cncc1C(=O)NC1CCN(C1)c1ccnc(Nc2ccc(F)cc2)n1                              | 10 | ZAK                      | ZAK     | > | 10000 |
| UNC10225330A | COC(=O)c1cccc(NC(=O)NC2CCN(C2)c2ccnc(Nc3ccc(OC)cc3<br>)n2)c1               | 3  | CAMK2A                   | CAMK2A  | > | 10000 |
| UNC10225330A | COC(=O)c1cccc(NC(=O)NC2CCN(C2)c2ccnc(Nc3ccc(OC)cc3<br>)n2)c1               | 3  | CAMK2B                   | CAMK2B  | > | 10000 |
| UNC10225330A | COC(=O)c1cccc(NC(=O)NC2CCN(C2)c2ccnc(Nc3ccc(OC)cc3<br>)n2)c1               | 3  | CLK2                     | CLK2    | > | 10000 |
| UNC10225330A | COC(=O)c1cccc(NC(=O)NC2CCN(C2)c2ccnc(Nc3ccc(OC)cc3<br>)n2)c1               | 3  | TRKC                     | NTRK3   | = | 1000  |
| UNC10225331A | CC[C@@H]1CO[C@@H](CN1c1cc(nc(NC)n1)-<br>c1ccc2c(N)n[nH]c2c1)C(=O)Nc1ccccc1 | 6  | CIT                      | CIT     | = | 200   |
| UNC10225331A | CC[C@@H]1CO[C@@H](CN1c1cc(nc(NC)n1)-<br>c1ccc2c(N)n[nH]c2c1)C(=O)Nc1ccccc1 | 6  | DCAMKL3                  | DCLK3   | = | 570   |

|              |                                                                       |   |             |         |   |       |
|--------------|-----------------------------------------------------------------------|---|-------------|---------|---|-------|
| UNC10225331A | CC[C@@H]1CO[C@@H](CN1c1cc(nc(NC)n1)-c1ccc2c(N)n[nH]c2c1)C(=O)Nc1cccc1 | 6 | DRAK1       | STK17A  | = | 220   |
| UNC10225331A | CC[C@@H]1CO[C@@H](CN1c1cc(nc(NC)n1)-c1ccc2c(N)n[nH]c2c1)C(=O)Nc1cccc1 | 6 | PDPK1       | PDPK1   | = | 1.7   |
| UNC10225331A | CC[C@@H]1CO[C@@H](CN1c1cc(nc(NC)n1)-c1ccc2c(N)n[nH]c2c1)C(=O)Nc1cccc1 | 6 | PKN1        | PKN1    | > | 10000 |
| UNC10225331A | CC[C@@H]1CO[C@@H](CN1c1cc(nc(NC)n1)-c1ccc2c(N)n[nH]c2c1)C(=O)Nc1cccc1 | 6 | PRKG2       | PRKG2   | = | 400   |
| UNC10225331A | CC[C@@H]1CO[C@@H](CN1c1cc(nc(NC)n1)-c1ccc2c(N)n[nH]c2c1)C(=O)Nc1cccc1 | 6 | PRKX        | PRKX    | = | 130   |
| UNC10225332A | Fc1cccc(Cn2ccn3c2nc(cc3=O)N2CCOCC2)c1                                 | 2 | PIK3CB      | PIK3CB  | = | 55    |
| UNC10225332A | Fc1cccc(Cn2ccn3c2nc(cc3=O)N2CCOCC2)c1                                 | 2 | VPS34       | PIK3CB  | = | 33    |
| UNC10225334A | COc1ccc(cc1)-c1nc2CCCn2c1-c1ccncc1                                    | 1 | DAPK1       | DAPK1   | > | 10000 |
| UNC10225334A | COc1ccc(cc1)-c1nc2CCCn2c1-c1ccncc1                                    | 1 | p38-alpha   | MAPK14  | = | 220   |
| UNC10225334A | COc1ccc(cc1)-c1nc2CCCn2c1-c1ccncc1                                    | 1 | RSK1(Kin.Dc | RPS6KA1 | = | 440   |
| UNC10225334B | COc1ccc(cc1)-c1nc2CCCn2c1-c1ccncc1                                    | 2 | p38-alpha   | MAPK14  | = | 130   |
| UNC10225334B | COc1ccc(cc1)-c1nc2CCCn2c1-c1ccncc1                                    | 2 | YSK4        | MAP3K19 | > | 10000 |
| UNC10225335A | COc1ccc(Nc2nccc(NCCNC(=O)Nc3cccc3F)n2)cc1                             | 2 | AAK1        | AAK1    | > | 10000 |
| UNC10225335A | COc1ccc(Nc2nccc(NCCNC(=O)Nc3cccc3F)n2)cc1                             | 2 | CLK3        | CLK3    | > | 10000 |
| UNC10225335A | COc1ccc(Nc2nccc(NCCNC(=O)Nc3cccc3F)n2)cc1                             | 2 | CSNK1E      | CSNK1E  | > | 10000 |
| UNC10225335A | COc1ccc(Nc2nccc(NCCNC(=O)Nc3cccc3F)n2)cc1                             | 2 | PRKD2       | PRKD2   | > | 10000 |
| UNC10225336A | Clc1cc(Cl)cc(Nc2ccnc(Nc3cc(Cl)cc(Cl)c3)n2)c1                          | 4 | AURKA       | AURKA   | > | 10000 |
| UNC10225336A | Clc1cc(Cl)cc(Nc2ccnc(Nc3cc(Cl)cc(Cl)c3)n2)c1                          | 4 | CSNK2A2     | CSNK2A2 | > | 10000 |
| UNC10225336A | Clc1cc(Cl)cc(Nc2ccnc(Nc3cc(Cl)cc(Cl)c3)n2)c1                          | 4 | GRK1        | GRK1    | > | 10000 |
| UNC10225336A | Clc1cc(Cl)cc(Nc2ccnc(Nc3cc(Cl)cc(Cl)c3)n2)c1                          | 4 | RIOK2       | RIOK2   | = | 150   |
| UNC10225337A | c1cc2c(ccnc2[nH]1)-c1cccc1                                            | 4 | BRSK2       | BRSK2   | > | 10000 |
| UNC10225337A | c1cc2c(ccnc2[nH]1)-c1cccc1                                            | 4 | CSNK1G1     | CSNK1G1 | > | 10000 |
| UNC10225337A | c1cc2c(ccnc2[nH]1)-c1cccc1                                            | 4 | GAK         | GAK     | = | 3700  |
| UNC10225337A | c1cc2c(ccnc2[nH]1)-c1cccc1                                            | 4 | MARK1       | MARK1   | > | 10000 |
| UNC10225337A | c1cc2c(ccnc2[nH]1)-c1cccc1                                            | 4 | ROCK1       | ROCK1   | = | 150   |
| UNC10225337A | c1cc2c(ccnc2[nH]1)-c1cccc1                                            | 4 | ROCK2       | ROCK2   | = | 530   |
| UNC10225337A | c1cc2c(ccnc2[nH]1)-c1cccc1                                            | 4 | YSK4        | MAP3K19 | = | 470   |
| UNC10225339A | CC1=C(C(CC(=O)N1)c1ccc(cc1)C(F)(F)F)C(=O)Nc1cc2cn[nH]c2cc1F           | 2 | ACVR2A      | ACVR2A  | > | 10000 |
| UNC10225339A | CC1=C(C(CC(=O)N1)c1ccc(cc1)C(F)(F)F)C(=O)Nc1cc2cn[nH]c2cc1F           | 2 | PRKX        | PRKX    | = | 350   |
| UNC10225339A | CC1=C(C(CC(=O)N1)c1ccc(cc1)C(F)(F)F)C(=O)Nc1cc2cn[nH]c2cc1F           | 2 | ROCK1       | ROCK1   | = | 2.7   |
| UNC10225339A | CC1=C(C(CC(=O)N1)c1ccc(cc1)C(F)(F)F)C(=O)Nc1cc2cn[nH]c2cc1F           | 2 | ROCK2       | ROCK2   | = | 2.7   |
| UNC10225339A | CC1=C(C(CC(=O)N1)c1ccc(cc1)C(F)(F)F)C(=O)Nc1cc2cn[nH]c2cc1F           | 2 | SNARK       | NUAK2   | = | 470   |
| UNC10225343A | Fc1ccc(Cn2ccn3c2nc(cc3=O)N2CCOCC2)cc1Cl                               | 3 | JAK2(JH1do  | JAK2    | > | 10000 |
| UNC10225343A | Fc1ccc(Cn2ccn3c2nc(cc3=O)N2CCOCC2)cc1Cl                               | 3 | PIK3CB      | PIK3CB  | = | 11    |
| UNC10225343A | Fc1ccc(Cn2ccn3c2nc(cc3=O)N2CCOCC2)cc1Cl                               | 3 | VPS34       | PIK3CB  | = | 15    |
| UNC10225344A | Nc1n[nH]c2cc(ccc12)-c1cc(nc(N)n1)N1CCCCC1                             | 2 | DRAK1       | STK17A  | = | 110   |
| UNC10225344A | Nc1n[nH]c2cc(ccc12)-c1cc(nc(N)n1)N1CCCCC1                             | 2 | PDPK1       | PDPK1   | = | 540   |
| UNC10225346A | CSc1ccc(NC2=C(C(=O)NC2=O)c2cccc2Cl)cc1                                | 2 | CLK2        | CLK2    | = | 460   |
| UNC10225346A | CSc1ccc(NC2=C(C(=O)NC2=O)c2cccc2Cl)cc1                                | 2 | GSK3A       | GSK3A   | = | 580   |
| UNC10225346A | CSc1ccc(NC2=C(C(=O)NC2=O)c2cccc2Cl)cc1                                | 2 | MKNK1       | MKNK1   | > | 10000 |
| UNC10225346A | CSc1ccc(NC2=C(C(=O)NC2=O)c2cccc2Cl)cc1                                | 2 | PDPK1       | PDPK1   | > | 10000 |
| UNC10225346A | CSc1ccc(NC2=C(C(=O)NC2=O)c2cccc2Cl)cc1                                | 2 | SLK         | SLK     | = | 770   |
| UNC10225352A | OCCCNc1cccc(n1)-c1c(nn2cc(ccc12)C(F)(F)F)-c1cccc(c1)C(F)(F)F          | 3 | GRK1        | GRK1    | > | 10000 |

|              |                                                                                                          |    |             |         |   |       |
|--------------|----------------------------------------------------------------------------------------------------------|----|-------------|---------|---|-------|
| UNC10225352A | OCCCNc1nccc(n1)-c1c(nn2cc(ccc12)C(F)(F)F)-<br>c1cccc(c1)C(F)(F)F                                         | 3  | NLK         | NLK     | = | 230   |
| UNC10225352A | OCCCNc1nccc(n1)-c1c(nn2cc(ccc12)C(F)(F)F)-<br>c1cccc(c1)C(F)(F)F                                         | 3  | p38-alpha   | MAPK14  | = | 1300  |
| UNC10225352A | OCCCNc1nccc(n1)-c1c(nn2cc(ccc12)C(F)(F)F)-<br>c1cccc(c1)C(F)(F)F                                         | 3  | RSK4(Kin.Dc | RPS6KA6 | = | 2700  |
| UNC10225352A | OCCCNc1nccc(n1)-c1c(nn2cc(ccc12)C(F)(F)F)-<br>c1cccc(c1)C(F)(F)F                                         | 3  | WNK4        | WNK4    | > | 10000 |
| UNC10225353A | Cc1ccc(NC(=O)Nc2cc(nn2-c2cccc2)C(C)(C)C)cc1                                                              | 13 | BRSK1       | BRSK1   | > | 10000 |
| UNC10225353A | Cc1ccc(NC(=O)Nc2cc(nn2-c2cccc2)C(C)(C)C)cc1                                                              | 13 | DDR1        | DDR1    | = | 1300  |
| UNC10225353A | Cc1ccc(NC(=O)Nc2cc(nn2-c2cccc2)C(C)(C)C)cc1                                                              | 13 | DDR2        | DDR2    | = | 410   |
| UNC10225353A | Cc1ccc(NC(=O)Nc2cc(nn2-c2cccc2)C(C)(C)C)cc1                                                              | 13 | FLT3        | FLT3    | = | 26    |
| UNC10225353A | Cc1ccc(NC(=O)Nc2cc(nn2-c2cccc2)C(C)(C)C)cc1                                                              | 13 | GRK3        | ADRBK2  | > | 10000 |
| UNC10225353A | Cc1ccc(NC(=O)Nc2cc(nn2-c2cccc2)C(C)(C)C)cc1                                                              | 13 | IRAK3       | IRAK3   | > | 10000 |
| UNC10225353A | Cc1ccc(NC(=O)Nc2cc(nn2-c2cccc2)C(C)(C)C)cc1                                                              | 13 | KIT         | KIT     | = | 260   |
| UNC10225353A | Cc1ccc(NC(=O)Nc2cc(nn2-c2cccc2)C(C)(C)C)cc1                                                              | 13 | MKMK2       | MKMK2   | = | 370   |
| UNC10225353A | Cc1ccc(NC(=O)Nc2cc(nn2-c2cccc2)C(C)(C)C)cc1                                                              | 13 | p38-alpha   | MAPK14  | = | 58    |
| UNC10225353A | Cc1ccc(NC(=O)Nc2cc(nn2-c2cccc2)C(C)(C)C)cc1                                                              | 13 | p38-beta    | MAPK11  | = | 540   |
| UNC10225353A | Cc1ccc(NC(=O)Nc2cc(nn2-c2cccc2)C(C)(C)C)cc1                                                              | 13 | PDGFRB      | PDGFRB  | = | 340   |
| UNC10225353A | Cc1ccc(NC(=O)Nc2cc(nn2-c2cccc2)C(C)(C)C)cc1                                                              | 13 | RAF1        | RAF1    | = | 270   |
| UNC10225355A | Cc1cccc1Cn1ccn2c1nc(cc2=O)N1CCOCC1                                                                       | 4  | BRSK2       | BRSK2   | > | 10000 |
| UNC10225355A | Cc1cccc1Cn1ccn2c1nc(cc2=O)N1CCOCC1                                                                       | 4  | MARK1       | MARK1   | > | 10000 |
| UNC10225355A | Cc1cccc1Cn1ccn2c1nc(cc2=O)N1CCOCC1                                                                       | 4  | MARK4       | MARK4   | > | 10000 |
| UNC10225355A | Cc1cccc1Cn1ccn2c1nc(cc2=O)N1CCOCC1                                                                       | 4  | PIK3CB      | PIK3CB  | = | 27    |
| UNC10225355A | Cc1cccc1Cn1ccn2c1nc(cc2=O)N1CCOCC1                                                                       | 4  | VPS34       | PIK3C3  | = | 180   |
| UNC10225359A | Cc1ccc(NC(=O)Nc2ccc(Cl)c(c2)C(F)(F)F)cc1-<br>c1ccc(cc1)C(=O)Nc1ccncc1                                    | 8  | CDKL1       | CDKL1   | > | 10000 |
| UNC10225359A | Cc1ccc(NC(=O)Nc2ccc(Cl)c(c2)C(F)(F)F)cc1-<br>c1ccc(cc1)C(=O)Nc1ccncc1                                    | 8  | CIT         | CIT     | = | 380   |
| UNC10225359A | Cc1ccc(NC(=O)Nc2ccc(Cl)c(c2)C(F)(F)F)cc1-<br>c1ccc(cc1)C(=O)Nc1ccncc1                                    | 8  | DDR1        | DDR1    | = | 120   |
| UNC10225359A | Cc1ccc(NC(=O)Nc2ccc(Cl)c(c2)C(F)(F)F)cc1-<br>c1ccc(cc1)C(=O)Nc1ccncc1                                    | 8  | KIT         | KIT     | = | 560   |
| UNC10225359A | Cc1ccc(NC(=O)Nc2ccc(Cl)c(c2)C(F)(F)F)cc1-<br>c1ccc(cc1)C(=O)Nc1ccncc1                                    | 8  | p38-alpha   | MAPK14  | = | 310   |
| UNC10225359A | Cc1ccc(NC(=O)Nc2ccc(Cl)c(c2)C(F)(F)F)cc1-<br>c1ccc(cc1)C(=O)Nc1ccncc1                                    | 8  | p38-beta    | MAPK11  | = | 90    |
| UNC10225359A | Cc1ccc(NC(=O)Nc2ccc(Cl)c(c2)C(F)(F)F)cc1-<br>c1ccc(cc1)C(=O)Nc1ccncc1                                    | 8  | PDGFRB      | PDGFRB  | = | 270   |
| UNC10225359A | Cc1ccc(NC(=O)Nc2ccc(Cl)c(c2)C(F)(F)F)cc1-<br>c1ccc(cc1)C(=O)Nc1ccncc1                                    | 8  | RAF1        | RAF1    | = | 340   |
| UNC10225360A | Oc1ccc2ncnc(Nc3ccc(OCc4cccc4)cc3)c2c1                                                                    | 8  | EGFR        | EGFR    | = | 9.3   |
| UNC10225360A | Oc1ccc2ncnc(Nc3ccc(OCc4cccc4)cc3)c2c1                                                                    | 8  | ERBB2       | ERBB2   | = | 27    |
| UNC10225360A | Oc1ccc2ncnc(Nc3ccc(OCc4cccc4)cc3)c2c1                                                                    | 8  | LTK         | LTK     | > | 10000 |
| UNC10225360A | Oc1ccc2ncnc(Nc3ccc(OCc4cccc4)cc3)c2c1                                                                    | 8  | MEK5        | MAP2K5  | = | 82    |
| UNC10225360A | Oc1ccc2ncnc(Nc3ccc(OCc4cccc4)cc3)c2c1                                                                    | 8  | PAK3        | PAK3    | > | 10000 |
| UNC10225360A | Oc1ccc2ncnc(Nc3ccc(OCc4cccc4)cc3)c2c1                                                                    | 8  | RIPK2       | RIPK2   | = | 8.1   |
| UNC10225362A | CC(C)(C)n1cnc2c(N)ncnc12                                                                                 | 1  | RSK1(Kin.Dc | RPS6KA1 | > | 10000 |
| UNC10225362A | CC(C)(C)n1cnc2c(N)ncnc12                                                                                 | 1  | SgK110      | SgK110  | > | 10000 |
| UNC10225362A | CC(C)(C)n1cnc2c(N)ncnc12                                                                                 | 1  | VRK2        | VRK2    | > | 10000 |
| UNC10225364A | Cc1cc(NCC(c2cccc2)c2cccc2)nc(NCc2ccc(cc2)C(F)(F)F)n1<br>O[C@H]([C@@H](O)C(O)=O)C(O)=O.BrC1cc2c(NC(=O)C3C | 0  | ADCK4       | ADCK4   | = | 2300  |
| UNC10225365A | CN(Cc4cccc4)C3)n[nH]c2nc1-c1ccco1                                                                        | 4  | CDK7        | CDK7    | = | 1100  |

|              |                                                                                        |   |            |         |   |       |
|--------------|----------------------------------------------------------------------------------------|---|------------|---------|---|-------|
| UNC10225365A | O[C@H]([C@@H](O)C(O)=O)C(O)=O.BrC1cc2c(NC(=O)C3C<br>CN(Cc4ccccc4)C3)n[nH]c2nc1-c1cccc1 | 4 | CDKL5      | CDKL5   | = | 1100  |
| UNC10225365A | O[C@H]([C@@H](O)C(O)=O)C(O)=O.BrC1cc2c(NC(=O)C3C<br>CN(Cc4ccccc4)C3)n[nH]c2nc1-c1cccc1 | 4 | GSK3A      | GSK3A   | = | 130   |
| UNC10225365A | O[C@H]([C@@H](O)C(O)=O)C(O)=O.BrC1cc2c(NC(=O)C3C<br>CN(Cc4ccccc4)C3)n[nH]c2nc1-c1cccc1 | 4 | MYLK2      | MYLK2   | = | 460   |
| UNC10225365A | O[C@H]([C@@H](O)C(O)=O)C(O)=O.BrC1cc2c(NC(=O)C3C<br>CN(Cc4ccccc4)C3)n[nH]c2nc1-c1cccc1 | 4 | PCTK1      | CDK16   | = | 150   |
| UNC10225365A | O[C@H]([C@@H](O)C(O)=O)C(O)=O.BrC1cc2c(NC(=O)C3C<br>CN(Cc4ccccc4)C3)n[nH]c2nc1-c1cccc1 | 4 | PCTK2      | CDK17   | = | 240   |
| UNC10225367A | CC(C)(C)c1cccc(cc1)-n1cnc2c(N)ncnc12                                                   | 3 | DRAK1      | STK17A  | = | 450   |
| UNC10225367A | CC(C)(C)c1cccc(cc1)-n1cnc2c(N)ncnc12                                                   | 3 | JAK1(JH2do | JAK1    | = | 250   |
| UNC10225367A | CC(C)(C)c1cccc(cc1)-n1cnc2c(N)ncnc12                                                   | 3 | PIK3C2B    | PIK3C2B | = | 8300  |
| UNC10225367A | CC(C)(C)c1cccc(cc1)-n1cnc2c(N)ncnc12                                                   | 3 | PIK3CA     | PIK3CA  | > | 10000 |
| UNC10225367A | CC(C)(C)c1cccc(cc1)-n1cnc2c(N)ncnc12                                                   | 3 | PIK3CG     | PIK3CG  | = | 2400  |
| UNC10225372A | COc1cc2ncn(-c3cc(OCC4CCCO4)c(s3)C(N)=O)c2cc1OC                                         | 9 | AURKC      | AURKC   | > | 10000 |
| UNC10225372A | COc1cc2ncn(-c3cc(OCC4CCCO4)c(s3)C(N)=O)c2cc1OC                                         | 9 | LOK        | STK10   | = | 100   |
| UNC10225372A | COc1cc2ncn(-c3cc(OCC4CCCO4)c(s3)C(N)=O)c2cc1OC                                         | 9 | MEK5       | MAP2K5  | = | 81    |
| UNC10225372A | COc1cc2ncn(-c3cc(OCC4CCCO4)c(s3)C(N)=O)c2cc1OC                                         | 9 | MYLK4      | MYLK4   | = | 500   |
| UNC10225372A | COc1cc2ncn(-c3cc(OCC4CCCO4)c(s3)C(N)=O)c2cc1OC                                         | 9 | PIP5K1C    | PIP5K1C | = | 7700  |
| UNC10225372A | COc1cc2ncn(-c3cc(OCC4CCCO4)c(s3)C(N)=O)c2cc1OC                                         | 9 | PLK1       | PLK1    | = | 13    |
| UNC10225372A | COc1cc2ncn(-c3cc(OCC4CCCO4)c(s3)C(N)=O)c2cc1OC                                         | 9 | PLK2       | PLK2    | = | 4.4   |
| UNC10225372A | COc1cc2ncn(-c3cc(OCC4CCCO4)c(s3)C(N)=O)c2cc1OC                                         | 9 | PLK3       | PLK3    | = | 40    |
| UNC10225372A | COc1cc2ncn(-c3cc(OCC4CCCO4)c(s3)C(N)=O)c2cc1OC                                         | 9 | PRKCI      | PRKCI   | > | 10000 |
| UNC10225372A | COc1cc2ncn(-c3cc(OCC4CCCO4)c(s3)C(N)=O)c2cc1OC                                         | 9 | RIOK3      | RIOK3   | = | 670   |
| UNC10225372A | COc1cc2ncn(-c3cc(OCC4CCCO4)c(s3)C(N)=O)c2cc1OC                                         | 9 | SIK2       | SIK2    | > | 10000 |
| UNC10225372A | COc1cc2ncn(-c3cc(OCC4CCCO4)c(s3)C(N)=O)c2cc1OC                                         | 9 | SLK        | SLK     | > | 10000 |
| UNC10225372A | COc1cc2ncn(-c3cc(OCC4CCCO4)c(s3)C(N)=O)c2cc1OC                                         | 9 | STK35      | STK35   | = | 3600  |
| UNC10225373A | Oc1c(Cl)cc(NC2=C(C(=O)NC2=O)c2cccc2)cc1Cl                                              | 1 | JAK3(JH1do | JAK3    | = | 380   |
| UNC10225373A | Oc1c(Cl)cc(NC2=C(C(=O)NC2=O)c2cccc2)cc1Cl                                              | 1 | PIP5K1C    | PIP5K1C | = | 1500  |
| UNC10225374A | CNc1cc(nc(N)n1)-c1ccc2c(N)n[nH]c2c1                                                    | 2 | CHEK2      | CHEK2   | = | 2000  |
| UNC10225374A | CNc1cc(nc(N)n1)-c1ccc2c(N)n[nH]c2c1                                                    | 2 | CLK1       | CLK1    | = | 330   |
| UNC10225374A | CNc1cc(nc(N)n1)-c1ccc2c(N)n[nH]c2c1                                                    | 2 | CLK2       | CLK2    | = | 410   |
| UNC10225374A | CNc1cc(nc(N)n1)-c1ccc2c(N)n[nH]c2c1                                                    | 2 | CLK4       | CLK4    | = | 140   |
| UNC10225374A | CNc1cc(nc(N)n1)-c1ccc2c(N)n[nH]c2c1                                                    | 2 | DRAK1      | STK17A  | = | 89    |
| UNC10225374A | CNc1cc(nc(N)n1)-c1ccc2c(N)n[nH]c2c1                                                    | 2 | DYRK2      | DYRK2   | = | 33    |
| UNC10225374A | CNc1cc(nc(N)n1)-c1ccc2c(N)n[nH]c2c1                                                    | 2 | PRKG2      | PRKG2   | = | 39    |
| UNC10225374A | CNc1cc(nc(N)n1)-c1ccc2c(N)n[nH]c2c1                                                    | 2 | RIOK1      | RIOK1   | = | 1100  |
| UNC10225374A | CNc1cc(nc(N)n1)-c1ccc2c(N)n[nH]c2c1                                                    | 2 | WNK4       | WNK4    | > | 10000 |
| UNC10225375A | COc1ccc(Nc2nccc(n2)N2CCC(C2)NC(=O)Nc2cccc(c2)C(C)=<br>O)cc1                            | 1 | VRK2       | VRK2    | > | 10000 |
| UNC10225378A | Cl.C(c1cccc1)n1cnc2cc(Nc3ncnc4cccc34)ccc12                                             | 0 | EPHB6      | EPHB6   | = | 510   |
| UNC10225379A | NS(=O)(=O)c1cccc(c1)-c1ccc2nccc(-<br>c3cccc(c3)S(N)(=O)=O)c2c1                         | 1 | PIK3CG     | PIK3CG  | = | 81    |
| UNC10225379A | NS(=O)(=O)c1cccc(c1)-c1ccc2nccc(-<br>c3cccc(c3)S(N)(=O)=O)c2c1                         | 1 | PIK4CB     | PI4KB   | = | 32    |
| UNC10225379A | NS(=O)(=O)c1cccc(c1)-c1ccc2nccc(-<br>c3cccc(c3)S(N)(=O)=O)c2c1                         | 1 | ULK2       | ULK2    | > | 10000 |
| UNC10225382A | Fc1ccc(cc1)-c1ncn(CCCN2CCOCC2)c1-c1ccccn1                                              | 1 | PRKCI      | PRKCI   | > | 10000 |
| UNC10225384A | Clc1cc2c(NC(=O)C3CC3)n[nH]c2nc1-c1cccc1                                                | 3 | GRK3       | ADRBK2  | > | 10000 |
| UNC10225384A | Clc1cc2c(NC(=O)C3CC3)n[nH]c2nc1-c1cccc1                                                | 3 | GSK3A      | GSK3A   | = | 390   |
| UNC10225384A | Clc1cc2c(NC(=O)C3CC3)n[nH]c2nc1-c1cccc1                                                | 3 | MYLK2      | MYLK2   | = | 150   |
| UNC10225384A | Clc1cc2c(NC(=O)C3CC3)n[nH]c2nc1-c1cccc1                                                | 3 | PDGFRB     | PDGFRB  | = | 170   |
| UNC10225384A | Clc1cc2c(NC(=O)C3CC3)n[nH]c2nc1-c1cccc1                                                | 3 | YSK4       | MAP3K19 | = | 7700  |
| UNC10225386A | COc1cc2ncn(-c3cc(OCC4ccncc4Br)c(s3)C(N)=O)c2cc1OC                                      | 5 | LOK        | STK10   | = | 500   |



|              |                                                                   |   |            |         |   |       |
|--------------|-------------------------------------------------------------------|---|------------|---------|---|-------|
| UNC10225386A | COc1cc2ncn(-c3cc(OCc4ccncc4Br)c(s3)C(N)=O)c2cc1OC                 | 5 | MEK5       | MAP2K5  | = | 78    |
| UNC10225386A | COc1cc2ncn(-c3cc(OCc4ccncc4Br)c(s3)C(N)=O)c2cc1OC                 | 5 | PIP5K1C    | PIP5K1C | = | 610   |
| UNC10225386A | COc1cc2ncn(-c3cc(OCc4ccncc4Br)c(s3)C(N)=O)c2cc1OC                 | 5 | PIP5K2C    | PIP4K2C | = | 330   |
| UNC10225386A | COc1cc2ncn(-c3cc(OCc4ccncc4Br)c(s3)C(N)=O)c2cc1OC                 | 5 | PLK1       | PLK1    | = | 1.1   |
| UNC10225386A | COc1cc2ncn(-c3cc(OCc4ccncc4Br)c(s3)C(N)=O)c2cc1OC                 | 5 | PLK2       | PLK2    | = | 1.4   |
| UNC10225386A | COc1cc2ncn(-c3cc(OCc4ccncc4Br)c(s3)C(N)=O)c2cc1OC                 | 5 | PLK3       | PLK3    | = | 9.4   |
| UNC10225386A | COc1cc2ncn(-c3cc(OCc4ccncc4Br)c(s3)C(N)=O)c2cc1OC                 | 5 | SLK        | SLK     | = | 680   |
| UNC10225387B | Cl.C[C@H](N[C@@H]1CCc2cc(ccc2C1)-<br>c1cnc(N)c(C)c1)c1cccc1       | 5 | AAK1       | AAK1    | = | 3600  |
| UNC10225387B | Cl.C[C@H](N[C@@H]1CCc2cc(ccc2C1)-<br>c1cnc(N)c(C)c1)c1cccc1       | 5 | CAMK1G     | CAMK1G  | > | 10000 |
| UNC10225387B | Cl.C[C@H](N[C@@H]1CCc2cc(ccc2C1)-<br>c1cnc(N)c(C)c1)c1cccc1       | 5 | CAMK2D     | CAMK2D  | > | 10000 |
| UNC10225387B | Cl.C[C@H](N[C@@H]1CCc2cc(ccc2C1)-<br>c1cnc(N)c(C)c1)c1cccc1       | 5 | DLK        | MAP3K12 | = | 280   |
| UNC10225387B | Cl.C[C@H](N[C@@H]1CCc2cc(ccc2C1)-<br>c1cnc(N)c(C)c1)c1cccc1       | 5 | MAP4K2     | MAP4K2  | = | 43    |
| UNC10225387B | Cl.C[C@H](N[C@@H]1CCc2cc(ccc2C1)-<br>c1cnc(N)c(C)c1)c1cccc1       | 5 | RIOK2      | RIOK2   | = | 650   |
| UNC10225387B | Cl.C[C@H](N[C@@H]1CCc2cc(ccc2C1)-<br>c1cnc(N)c(C)c1)c1cccc1       | 5 | TRKA       | NTRK1   | = | 2500  |
| UNC10225387B | Cl.C[C@H](N[C@@H]1CCc2cc(ccc2C1)-<br>c1cnc(N)c(C)c1)c1cccc1       | 5 | YSK4       | MAP3K19 | = | 2400  |
| UNC10225388A | Cc1ccc(NC(=O)Nc2ccc(Cl)cc2)cc1-<br>c1ccc(cc1)C(=O)Nc1ccncc1       | 6 | CIT        | CIT     | = | 430   |
| UNC10225388A | Cc1ccc(NC(=O)Nc2ccc(Cl)cc2)cc1-<br>c1ccc(cc1)C(=O)Nc1ccncc1       | 6 | CSF1R      | CSF1R   | = | 6700  |
| UNC10225388A | Cc1ccc(NC(=O)Nc2ccc(Cl)cc2)cc1-<br>c1ccc(cc1)C(=O)Nc1ccncc1       | 6 | DDR1       | DDR1    | = | 73    |
| UNC10225388A | Cc1ccc(NC(=O)Nc2ccc(Cl)cc2)cc1-<br>c1ccc(cc1)C(=O)Nc1ccncc1       | 6 | KIT        | KIT     | = | 140   |
| UNC10225388A | Cc1ccc(NC(=O)Nc2ccc(Cl)cc2)cc1-<br>c1ccc(cc1)C(=O)Nc1ccncc1       | 6 | PDGFRB     | PDGFRB  | = | 86    |
| UNC10225388A | Cc1ccc(NC(=O)Nc2ccc(Cl)cc2)cc1-<br>c1ccc(cc1)C(=O)Nc1ccncc1       | 6 | RAF1       | RAF1    | = | 350   |
| UNC10225389A | CCCCc1nc2c(N)ncnc2n1CCCC                                          | 1 | ROCK1      | ROCK1   | = | 280   |
| UNC10225391A | COc1ccc(CNC(=O)NC2CCN(C2)c2ccnc(Nc3cc(OC)c(OC)c(O)<br>C)c3)n2)cc1 | 5 | AURKB      | AURKB   | = | 330   |
| UNC10225391A | COc1ccc(CNC(=O)NC2CCN(C2)c2ccnc(Nc3cc(OC)c(OC)c(O)<br>C)c3)n2)cc1 | 5 | DLK        | MAP3K12 | = | 5100  |
| UNC10225391A | COc1ccc(CNC(=O)NC2CCN(C2)c2ccnc(Nc3cc(OC)c(OC)c(O)<br>C)c3)n2)cc1 | 5 | EPHB6      | EPHB6   | = | 180   |
| UNC10225391A | COc1ccc(CNC(=O)NC2CCN(C2)c2ccnc(Nc3cc(OC)c(OC)c(O)<br>C)c3)n2)cc1 | 5 | JAK2(JH1do | JAK2    | = | 350   |
| UNC10225391A | COc1ccc(CNC(=O)NC2CCN(C2)c2ccnc(Nc3cc(OC)c(OC)c(O)<br>C)c3)n2)cc1 | 5 | MEK5       | MAP2K5  | = | 95    |
| UNC10225391A | COc1ccc(CNC(=O)NC2CCN(C2)c2ccnc(Nc3cc(OC)c(OC)c(O)<br>C)c3)n2)cc1 | 5 | NEK5       | NEK5    | = | 730   |
| UNC10225391A | COc1ccc(CNC(=O)NC2CCN(C2)c2ccnc(Nc3cc(OC)c(OC)c(O)<br>C)c3)n2)cc1 | 5 | PIP5K2C    | PIP4K2C | = | 600   |
| UNC10225391A | COc1ccc(CNC(=O)NC2CCN(C2)c2ccnc(Nc3cc(OC)c(OC)c(O)<br>C)c3)n2)cc1 | 5 | ULK3       | ULK3    | = | 550   |
| UNC10225398A | Cc1ccc(NC(=O)Nc2ccccc2F)cc1-c1ccc(cc1)C(=O)Nc1ccncc1              | 5 | CIT        | CIT     | = | 570   |

|              |                                                            |    |            |         |   |       |
|--------------|------------------------------------------------------------|----|------------|---------|---|-------|
| UNC10225398A | Cc1ccc(NC(=O)Nc2ccccc2F)cc1-c1ccc(cc1)C(=O)Nc1ccncc1       | 5  | CSF1R      | CSF1R   | = | 2600  |
| UNC10225398A | Cc1ccc(NC(=O)Nc2ccccc2F)cc1-c1ccc(cc1)C(=O)Nc1ccncc1       | 5  | DDR1       | DDR1    | = | 180   |
| UNC10225398A | Cc1ccc(NC(=O)Nc2ccccc2F)cc1-c1ccc(cc1)C(=O)Nc1ccncc1       | 5  | KIT        | KIT     | = | 450   |
| UNC10225398A | Cc1ccc(NC(=O)Nc2ccccc2F)cc1-c1ccc(cc1)C(=O)Nc1ccncc1       | 5  | PDGFRB     | PDGFRB  | = | 47    |
| UNC10225398A | Cc1ccc(NC(=O)Nc2ccccc2F)cc1-c1ccc(cc1)C(=O)Nc1ccncc1       | 5  | YSK4       | MAP3K19 | = | 1500  |
| UNC10225400A | NS(=O)(=O)c1cccc(c1)-c1ccc2ncc(nc2c1)N1CCOCC1              | 1  | PIK4CB     | PI4KB   | = | 860   |
| UNC10225400A | NS(=O)(=O)c1cccc(c1)-c1ccc2ncc(nc2c1)N1CCOCC1              | 1  | VPS34      | PIK3C3  | > | 10000 |
| UNC10225400A | NS(=O)(=O)c1cccc(c1)-c1ccc2ncc(nc2c1)N1CCOCC1              | 1  | YSK4       | MAP3K19 | = | 3400  |
| UNC10225401A | OC(=O)c1cccc(NC2=C(C(=O)NC2=O)c2ccccc2Cl)c1                | 11 | ABL1-phosp | ABL1    | > | 10000 |
| UNC10225401A | OC(=O)c1cccc(NC2=C(C(=O)NC2=O)c2ccccc2Cl)c1                | 11 | CLK2       | CLK2    | = | 400   |
| UNC10225401A | OC(=O)c1cccc(NC2=C(C(=O)NC2=O)c2ccccc2Cl)c1                | 11 | HIPK1      | HIPK1   | = | 210   |
| UNC10225401A | OC(=O)c1cccc(NC2=C(C(=O)NC2=O)c2ccccc2Cl)c1                | 11 | HIPK2      | HIPK2   | = | 140   |
| UNC10225401A | OC(=O)c1cccc(NC2=C(C(=O)NC2=O)c2ccccc2Cl)c1                | 11 | HIPK3      | HIPK3   | = | 340   |
| UNC10225401A | OC(=O)c1cccc(NC2=C(C(=O)NC2=O)c2ccccc2Cl)c1                | 11 | IKK-alpha  | CHUK    | > | 10000 |
| UNC10225401A | OC(=O)c1cccc(NC2=C(C(=O)NC2=O)c2ccccc2Cl)c1                | 11 | MST2       | STK3    | > | 10000 |
| UNC10225401A | OC(=O)c1cccc(NC2=C(C(=O)NC2=O)c2ccccc2Cl)c1                | 11 | ULK3       | ULK3    | > | 10000 |
| UNC10225403A | C[C@@H]1CN(CCO1)c1cc(=O)n2nc(C)n(Cc3cccc(c3C)C(F)(F)F)c2n1 | 2  | MYLK4      | MYLK4   | > | 10000 |
| UNC10225403A | C[C@@H]1CN(CCO1)c1cc(=O)n2nc(C)n(Cc3cccc(c3C)C(F)(F)F)c2n1 | 2  | PIK3CB     | PIK3CB  | = | 1.8   |
| UNC10225404A | Cc1nnc(o1)-c1ccc(C)c(c1)-c1ccc(cc1)C(=O)NCC1CC1            | 1  | p38-alpha  | MAPK14  | = | 250   |
| UNC10225404A | Cc1nnc(o1)-c1ccc(C)c(c1)-c1ccc(cc1)C(=O)NCC1CC1            | 1  | PKN1       | PKN1    | > | 10000 |
| UNC10225406A | CN1C(=O)C(Nc2ccc(Cl)c(c2)C(O)=O)=C(C1=O)c1ccc(Cl)cc1       | 3  | AAK1       | AAK1    | > | 10000 |
| UNC10225406A | CN1C(=O)C(Nc2ccc(Cl)c(c2)C(O)=O)=C(C1=O)c1ccc(Cl)cc1       | 3  | CAMK1G     | CAMK1G  | > | 10000 |
| UNC10225406A | CN1C(=O)C(Nc2ccc(Cl)c(c2)C(O)=O)=C(C1=O)c1ccc(Cl)cc1       | 3  | PKN1       | PKN1    | > | 10000 |
| UNC10225407A | CCn1c(nc2cnccc12)-c1ccccc1                                 | 1  | CDC2L5     | CDK13   | > | 10000 |
| UNC10225410A | Nc1ncnc2n(cnc12)-c1cccc2ccccc12                            | 3  | LKB1       | STK11   | > | 10000 |
| UNC10225410A | Nc1ncnc2n(cnc12)-c1cccc2ccccc12                            | 3  | PCTK2      | CDK17   | > | 10000 |
| UNC10225410A | Nc1ncnc2n(cnc12)-c1cccc2ccccc12                            | 3  | YANK2      | STK32B  | > | 10000 |
| UNC10225413A | COc1ccc(cc1)-n1cnc2c(N)ncnc12                              | 3  | FLT3       | FLT3    | = | 120   |
| UNC10225413A | COc1ccc(cc1)-n1cnc2c(N)ncnc12                              | 3  | KIT        | KIT     | = | 200   |
| UNC10225413A | COc1ccc(cc1)-n1cnc2c(N)ncnc12                              | 3  | PDGFRB     | PDGFRB  | = | 200   |
| UNC10225415A | Cc1cn2c(nc(cc2=O)N2CCOCC2)n1Cc1cccc(Cl)c1Cl                | 4  | PIK3CB     | PIK3CB  | = | 2.4   |
| UNC10225415A | Cc1cn2c(nc(cc2=O)N2CCOCC2)n1Cc1cccc(Cl)c1Cl                | 4  | PIK3CD     | PIK3CD  | = | 120   |
| UNC10225415A | Cc1cn2c(nc(cc2=O)N2CCOCC2)n1Cc1cccc(Cl)c1Cl                | 4  | VPS34      | PIK3C3  | = | 2.2   |
| UNC10225417A | CSc1nn2c(nc(cc2=O)N2CCOCC2)n1Cc1cccc(c1C)C(F)(F)F          | 10 | ASK2       | MAP3K6  | > | 10000 |
| UNC10225417A | CSc1nn2c(nc(cc2=O)N2CCOCC2)n1Cc1cccc(c1C)C(F)(F)F          | 10 | CSNK1G1    | CSNK1G1 | > | 10000 |
| UNC10225417A | CSc1nn2c(nc(cc2=O)N2CCOCC2)n1Cc1cccc(c1C)C(F)(F)F          | 10 | GAK        | GAK     | > | 10000 |
| UNC10225417A | CSc1nn2c(nc(cc2=O)N2CCOCC2)n1Cc1cccc(c1C)C(F)(F)F          | 10 | JAK2(JH1do | JAK2    | > | 10000 |
| UNC10225417A | CSc1nn2c(nc(cc2=O)N2CCOCC2)n1Cc1cccc(c1C)C(F)(F)F          | 10 | MST4       | MST4    | > | 10000 |
| UNC10225417A | CSc1nn2c(nc(cc2=O)N2CCOCC2)n1Cc1cccc(c1C)C(F)(F)F          | 10 | NEK2       | NEK2    | > | 10000 |
| UNC10225417A | CSc1nn2c(nc(cc2=O)N2CCOCC2)n1Cc1cccc(c1C)C(F)(F)F          | 10 | PIK3CB     | PIK3CB  | = | 0.48  |
| UNC10225417A | CSc1nn2c(nc(cc2=O)N2CCOCC2)n1Cc1cccc(c1C)C(F)(F)F          | 10 | PIK3CD     | PIK3CD  | = | 64    |
| UNC10225417A | CSc1nn2c(nc(cc2=O)N2CCOCC2)n1Cc1cccc(c1C)C(F)(F)F          | 10 | ROCK1      | ROCK1   | = | 46    |
| UNC10225417A | CSc1nn2c(nc(cc2=O)N2CCOCC2)n1Cc1cccc(c1C)C(F)(F)F          | 10 | ROCK2      | ROCK2   | = | 82    |
| UNC10225417A | CSc1nn2c(nc(cc2=O)N2CCOCC2)n1Cc1cccc(c1C)C(F)(F)F          | 10 | VPS34      | PIK3C3  | = | 78    |
| UNC10225418A | Fc1ccc(cc1)-c1nc[nH]c1-c1ccncc1                            | 7  | BUB1       | BUB1    | = | 890   |
| UNC10225418A | Fc1ccc(cc1)-c1nc[nH]c1-c1ccncc1                            | 7  | CIT        | CIT     | = | 310   |
| UNC10225418A | Fc1ccc(cc1)-c1nc[nH]c1-c1ccncc1                            | 7  | CSNK1A1    | CSNK1A1 | = | 87    |
| UNC10225418A | Fc1ccc(cc1)-c1nc[nH]c1-c1ccncc1                            | 7  | CSNK1D     | CSNK1D  | = | 41    |

|              |                                                                   |    |              |         |   |       |
|--------------|-------------------------------------------------------------------|----|--------------|---------|---|-------|
| UNC10225418A | Fc1ccc(cc1)-c1nc[nH]c1-c1ccncc1                                   | 7  | CSNK1E       | CSNK1E  | = | 140   |
| UNC10225418A | Fc1ccc(cc1)-c1nc[nH]c1-c1ccncc1                                   | 7  | JNK2         | MAPK9   | = | 85    |
| UNC10225418A | Fc1ccc(cc1)-c1nc[nH]c1-c1ccncc1                                   | 7  | JNK3         | MAPK10  | = | 11    |
| UNC10225418A | Fc1ccc(cc1)-c1nc[nH]c1-c1ccncc1                                   | 7  | p38-alpha    | MAPK14  | = | 67    |
| UNC10225418A | Fc1ccc(cc1)-c1nc[nH]c1-c1ccncc1                                   | 7  | RSK4(Kin.Dc) | RPS6KA6 | = | 310   |
| UNC10225421A | O=C(N1CCOCC1)c1ccc(cc1)-c1cc(ccn1)-c1c[nH]nc1-c1cccn1             | 1  | TGFBR1       | TGFBR1  | = | 180   |
| UNC10225422A | Cl.Fc1ccccc1COc1ccc(Nc2ncnc3ccc(cc23)-c2nnc(o2)C(F)(F)F)cc1Cl     | 5  | EGFR         | EGFR    | = | 43    |
| UNC10225422A | Cl.Fc1ccccc1COc1ccc(Nc2ncnc3ccc(cc23)-c2nnc(o2)C(F)(F)F)cc1Cl     | 5  | ERBB2        | ERBB2   | = | 110   |
| UNC10225424A | COc1ccc(Nc2ncccc(n2)N2CCC(C2)NC(=O)Nc2cc(C)ccc2C)cc1              | 1  | STK36        | STK36   | = | 1600  |
| UNC10225425A | FC(F)(F)c1ccc(cc1)-c1ncn(CCCN2CCOCC2)c1-c1ccncc1                  | 0  | FGFR1        | FGFR1   | > | 10000 |
| UNC10225425A | FC(F)(F)c1ccc(cc1)-c1ncn(CCCN2CCOCC2)c1-c1ccncc1                  | 0  | PRKCD        | PRKCD   | > | 10000 |
| UNC10225429A | Nc1nc(-c2nccs2)c(s1)-c1ccnc2cccc12                                | 2  | AKT3         | AKT3    | > | 10000 |
| UNC10225429A | Nc1nc(-c2nccs2)c(s1)-c1ccnc2cccc12                                | 2  | DMPK         | DMPK    | > | 10000 |
| UNC10225429A | Nc1nc(-c2nccs2)c(s1)-c1ccnc2cccc12                                | 2  | RSK2(Kin.Dc) | RPS6KA3 | > | 10000 |
| UNC10225431A | COc1ccc(cc1)-c1oc2ncnc(N)c2c1-c1ccc(OC)cc1                        | 5  | DDR1         | DDR1    | = | 650   |
| UNC10225431A | COc1ccc(cc1)-c1oc2ncnc(N)c2c1-c1ccc(OC)cc1                        | 5  | LATS1        | LATS1   | > | 10000 |
| UNC10225431A | COc1ccc(cc1)-c1oc2ncnc(N)c2c1-c1ccc(OC)cc1                        | 5  | MEK5         | MAP2K5  | = | 3000  |
| UNC10225431A | COc1ccc(cc1)-c1oc2ncnc(N)c2c1-c1ccc(OC)cc1                        | 5  | TYK2(JH2do)  | TYK2    | = | 1600  |
| UNC10225435A | CSc1nn2c(nc(cc2=O)N2CCOCC2)n1Cc1cccc(Cl)c1Cl                      | 4  | CLK3         | CLK3    | > | 10000 |
| UNC10225435A | CSc1nn2c(nc(cc2=O)N2CCOCC2)n1Cc1cccc(Cl)c1Cl                      | 4  | CSNK1E       | CSNK1E  | > | 10000 |
| UNC10225435A | CSc1nn2c(nc(cc2=O)N2CCOCC2)n1Cc1cccc(Cl)c1Cl                      | 4  | DLK          | MAP3K12 | > | 10000 |
| UNC10225435A | CSc1nn2c(nc(cc2=O)N2CCOCC2)n1Cc1cccc(Cl)c1Cl                      | 4  | PIK3C2B      | PIK3C2B | = | 360   |
| UNC10225435A | CSc1nn2c(nc(cc2=O)N2CCOCC2)n1Cc1cccc(Cl)c1Cl                      | 4  | PIK3CB       | PIK3CB  | = | 0.8   |
| UNC10225435A | CSc1nn2c(nc(cc2=O)N2CCOCC2)n1Cc1cccc(Cl)c1Cl                      | 4  | PIK3CD       | PIK3CD  | = | 240   |
| UNC10225435A | CSc1nn2c(nc(cc2=O)N2CCOCC2)n1Cc1cccc(Cl)c1Cl                      | 4  | VPS34        | PIK3C3  | = | 0.72  |
| UNC10225439A | O=c1cc(nc2n(Cc3cccc4cccc34)ccn12)N1CCOCC1                         | 2  | PIK3CB       | PIK3CB  | = | 2.9   |
| UNC10225439A | O=c1cc(nc2n(Cc3cccc4cccc34)ccn12)N1CCOCC1                         | 2  | PIK3CD       | PIK3CD  | = | 150   |
| UNC10225439A | O=c1cc(nc2n(Cc3cccc4cccc34)ccn12)N1CCOCC1                         | 2  | RET          | RET     | > | 10000 |
| UNC10225439A | O=c1cc(nc2n(Cc3cccc4cccc34)ccn12)N1CCOCC1                         | 2  | VPS34        | PIK3C3  | = | 60    |
| UNC10225440A | Cl.Fc1cccc(F)c1C(=O)Nc1cccc(c1)-c1nn2ncccc2c1-c1ccnc(Nc2cccnc2)n1 | 13 | BRAF         | BRAF    | = | 62    |
| UNC10225440A | Cl.Fc1cccc(F)c1C(=O)Nc1cccc(c1)-c1nn2ncccc2c1-c1ccnc(Nc2cccnc2)n1 | 13 | DDR1         | DDR1    | = | 140   |
| UNC10225440A | Cl.Fc1cccc(F)c1C(=O)Nc1cccc(c1)-c1nn2ncccc2c1-c1ccnc(Nc2cccnc2)n1 | 13 | EGFR         | EGFR    | = | 38    |
| UNC10225440A | Cl.Fc1cccc(F)c1C(=O)Nc1cccc(c1)-c1nn2ncccc2c1-c1ccnc(Nc2cccnc2)n1 | 13 | ERBB2        | ERBB2   | = | 29    |
| UNC10225440A | Cl.Fc1cccc(F)c1C(=O)Nc1cccc(c1)-c1nn2ncccc2c1-c1ccnc(Nc2cccnc2)n1 | 13 | ERBB4        | ERBB4   | = | 64    |
| UNC10225440A | Cl.Fc1cccc(F)c1C(=O)Nc1cccc(c1)-c1nn2ncccc2c1-c1ccnc(Nc2cccnc2)n1 | 13 | MEK5         | MAP2K5  | = | 230   |
| UNC10225440A | Cl.Fc1cccc(F)c1C(=O)Nc1cccc(c1)-c1nn2ncccc2c1-c1ccnc(Nc2cccnc2)n1 | 13 | RAF1         | RAF1    | = | 430   |
| UNC10225440A | Cl.Fc1cccc(F)c1C(=O)Nc1cccc(c1)-c1nn2ncccc2c1-c1ccnc(Nc2cccnc2)n1 | 13 | STK36        | STK36   | = | 98    |
| UNC10225443A | CN1CCC(CC1)n1cnc(c1-c1ccnc(NC2CCNCC2)n1)-c1ccc(F)cc1              | 6  | CSNK1A1      | CSNK1A1 | = | 160   |
| UNC10225443A | CN1CCC(CC1)n1cnc(c1-c1ccnc(NC2CCNCC2)n1)-c1ccc(F)cc1              | 6  | CSNK1D       | CSNK1D  | = | 89    |
| UNC10225443A | CN1CCC(CC1)n1cnc(c1-c1ccnc(NC2CCNCC2)n1)-c1ccc(F)cc1              | 6  | CSNK1E       | CSNK1E  | = | 210   |

|              |                                                                                    |    |            |         |   |       |
|--------------|------------------------------------------------------------------------------------|----|------------|---------|---|-------|
| UNC10225443A | CN1CCC(CC1)n1cnc(c1-c1ccnc(NC2CCNCC2)n1)-c1ccc(F)cc1                               | 6  | JNK2       | MAPK9   | = | 170   |
| UNC10225443A | CN1CCC(CC1)n1cnc(c1-c1ccnc(NC2CCNCC2)n1)-c1ccc(F)cc1                               | 6  | JNK3       | MAPK10  | = | 140   |
| UNC10225443A | CN1CCC(CC1)n1cnc(c1-c1ccnc(NC2CCNCC2)n1)-c1ccc(F)cc1                               | 6  | p38-alpha  | MAPK14  | = | 220   |
| UNC10225443A | CN1CCC(CC1)n1cnc(c1-c1ccnc(NC2CCNCC2)n1)-c1ccc(F)cc1                               | 6  | PIP5K2C    | PIP4K2C | = | 220   |
| UNC10225443A | CN1CCC(CC1)n1cnc(c1-c1ccnc(NC2CCNCC2)n1)-c1ccc(F)cc1                               | 6  | SGK2       | SGK2    | > | 10000 |
| UNC10225444A | O[C@H]([C@@H](O)C(O)=O)C(O)=O.BrC1cc2c(NC(=O)c3ccc(CN4CCCC4)cc3)n[nH]c2nc1-c1ccco1 | 9  | EPHA4      | EPHA4   | > | 10000 |
| UNC10225444A | O[C@H]([C@@H](O)C(O)=O)C(O)=O.BrC1cc2c(NC(=O)c3ccc(CN4CCCC4)cc3)n[nH]c2nc1-c1ccco1 | 9  | EPHA6      | EPHA6   | > | 10000 |
| UNC10225444A | O[C@H]([C@@H](O)C(O)=O)C(O)=O.BrC1cc2c(NC(=O)c3ccc(CN4CCCC4)cc3)n[nH]c2nc1-c1ccco1 | 9  | EPHB6      | EPHB6   | = | 160   |
| UNC10225444A | O[C@H]([C@@H](O)C(O)=O)C(O)=O.BrC1cc2c(NC(=O)c3ccc(CN4CCCC4)cc3)n[nH]c2nc1-c1ccco1 | 9  | FLT3       | FLT3    | = | 45    |
| UNC10225444A | O[C@H]([C@@H](O)C(O)=O)C(O)=O.BrC1cc2c(NC(=O)c3ccc(CN4CCCC4)cc3)n[nH]c2nc1-c1ccco1 | 9  | KIT        | KIT     | = | 66    |
| UNC10225444A | O[C@H]([C@@H](O)C(O)=O)C(O)=O.BrC1cc2c(NC(=O)c3ccc(CN4CCCC4)cc3)n[nH]c2nc1-c1ccco1 | 9  | MEK5       | MAP2K5  | = | 550   |
| UNC10225444A | O[C@H]([C@@H](O)C(O)=O)C(O)=O.BrC1cc2c(NC(=O)c3ccc(CN4CCCC4)cc3)n[nH]c2nc1-c1ccco1 | 9  | MYLK       | MYLK    | = | 1300  |
| UNC10225444A | O[C@H]([C@@H](O)C(O)=O)C(O)=O.BrC1cc2c(NC(=O)c3ccc(CN4CCCC4)cc3)n[nH]c2nc1-c1ccco1 | 9  | MYLK2      | MYLK2   | = | 120   |
| UNC10225444A | O[C@H]([C@@H](O)C(O)=O)C(O)=O.BrC1cc2c(NC(=O)c3ccc(CN4CCCC4)cc3)n[nH]c2nc1-c1ccco1 | 9  | PDGFRB     | PDGFRB  | = | 67    |
| UNC10225445A | COc1ccc(NC(=O)Nc2ccc(C)c(c2)-c2ccc(cc2)C(=O)Nc2ccncc2)cc1                          | 6  | CSF1R      | CSF1R   | = | 1800  |
| UNC10225445A | COc1ccc(NC(=O)Nc2ccc(C)c(c2)-c2ccc(cc2)C(=O)Nc2ccncc2)cc1                          | 6  | DDR1       | DDR1    | = | 860   |
| UNC10225445A | COc1ccc(NC(=O)Nc2ccc(C)c(c2)-c2ccc(cc2)C(=O)Nc2ccncc2)cc1                          | 6  | FLT3       | FLT3    | = | 2200  |
| UNC10225445A | COc1ccc(NC(=O)Nc2ccc(C)c(c2)-c2ccc(cc2)C(=O)Nc2ccncc2)cc1                          | 6  | KIT        | KIT     | = | 44    |
| UNC10225445A | COc1ccc(NC(=O)Nc2ccc(C)c(c2)-c2ccc(cc2)C(=O)Nc2ccncc2)cc1                          | 6  | PDGFRB     | PDGFRB  | = | 48    |
| UNC10225448A | COc1cccc(c1)-c1cc(ccn1)-c1c[nH]nc1-c1ccccn1                                        | 4  | AURKC      | AURKC   | > | 10000 |
| UNC10225448A | COc1cccc(c1)-c1cc(ccn1)-c1c[nH]nc1-c1ccccn1                                        | 4  | FLT4       | FLT4    | > | 10000 |
| UNC10225448A | COc1cccc(c1)-c1cc(ccn1)-c1c[nH]nc1-c1ccccn1                                        | 4  | MAK        | MAK     | > | 10000 |
| UNC10225448A | COc1cccc(c1)-c1cc(ccn1)-c1c[nH]nc1-c1ccccn1                                        | 4  | RIOK3      | RIOK3   | = | 9600  |
| UNC10225448A | COc1cccc(c1)-c1cc(ccn1)-c1c[nH]nc1-c1ccccn1                                        | 4  | SRPK1      | SRPK1   | > | 10000 |
| UNC10225449A | Cl.COc1cc2ncnc(Nc3cccc(Br)c3)c2cc1OC                                               | 13 | BUB1       | BUB1    | = | 130   |
| UNC10225449A | Cl.COc1cc2ncnc(Nc3cccc(Br)c3)c2cc1OC                                               | 13 | EGFR       | EGFR    | = | 0.32  |
| UNC10225449A | Cl.COc1cc2ncnc(Nc3cccc(Br)c3)c2cc1OC                                               | 13 | ERBB2      | ERBB2   | = | 85    |
| UNC10225449A | Cl.COc1cc2ncnc(Nc3cccc(Br)c3)c2cc1OC                                               | 13 | GAK        | GAK     | = | 29    |
| UNC10225449A | Cl.COc1cc2ncnc(Nc3cccc(Br)c3)c2cc1OC                                               | 13 | MEK5       | MAP2K5  | = | 700   |
| UNC10225450A | COc1cc2ncn(-c3cc(OCCCc4cccc4)c(s3)C(N)=O)c2cc1OC                                   | 4  | MEK5       | MAP2K5  | = | 280   |
| UNC10225450A | COc1cc2ncn(-c3cc(OCCCc4cccc4)c(s3)C(N)=O)c2cc1OC                                   | 4  | PLK1       | PLK1    | = | 18    |
| UNC10225450A | COc1cc2ncn(-c3cc(OCCCc4cccc4)c(s3)C(N)=O)c2cc1OC                                   | 4  | PLK2       | PLK2    | = | 34    |
| UNC10225450A | COc1cc2ncn(-c3cc(OCCCc4cccc4)c(s3)C(N)=O)c2cc1OC                                   | 4  | PLK3       | PLK3    | = | 120   |
| UNC10225454A | COc1cccc(c1)-n1cnc2c(N)ncnc12                                                      | 1  | MEK5       | MAP2K5  | = | 1300  |
| UNC10225454A | COc1cccc(c1)-n1cnc2c(N)ncnc12                                                      | 1  | TYK2(JH1do | TYK2    | > | 10000 |
| UNC10225455A | BrC1cc2c(NC(=O)C3CC3)n[nH]c2nc1-c1cccs1                                            | 11 | CAMK2A     | CAMK2A  | > | 10000 |

|              |                                                           |    |             |         |   |       |
|--------------|-----------------------------------------------------------|----|-------------|---------|---|-------|
| UNC10225455A | Brc1cc2c(NC(=O)C3CC3)n[nH]c2nc1-c1cccc1                   | 11 | CAMK2B      | CAMK2B  | > | 10000 |
| UNC10225455A | Brc1cc2c(NC(=O)C3CC3)n[nH]c2nc1-c1cccc1                   | 11 | CDKL2       | CDKL2   | = | 140   |
| UNC10225455A | Brc1cc2c(NC(=O)C3CC3)n[nH]c2nc1-c1cccc1                   | 11 | ERK8        | MAPK15  | = | 130   |
| UNC10225455A | Brc1cc2c(NC(=O)C3CC3)n[nH]c2nc1-c1cccc1                   | 11 | FLT3        | FLT3    | = | 150   |
| UNC10225455A | Brc1cc2c(NC(=O)C3CC3)n[nH]c2nc1-c1cccc1                   | 11 | GSK3A       | GSK3A   | = | 91    |
| UNC10225455A | Brc1cc2c(NC(=O)C3CC3)n[nH]c2nc1-c1cccc1                   | 11 | MEK4        | MAP2K4  | > | 10000 |
| UNC10225455A | Brc1cc2c(NC(=O)C3CC3)n[nH]c2nc1-c1cccc1                   | 11 | MLCK        | MYLK3   | = | 180   |
| UNC10225455A | Brc1cc2c(NC(=O)C3CC3)n[nH]c2nc1-c1cccc1                   | 11 | MYLK2       | MYLK2   | = | 8.4   |
| UNC10225455A | Brc1cc2c(NC(=O)C3CC3)n[nH]c2nc1-c1cccc1                   | 11 | RIPK2       | RIPK2   | > | 10000 |
| UNC10225455A | Brc1cc2c(NC(=O)C3CC3)n[nH]c2nc1-c1cccc1                   | 11 | RSK4(Kin.Dc | RPS6KA6 | = | 3800  |
| UNC10225455A | Brc1cc2c(NC(=O)C3CC3)n[nH]c2nc1-c1cccc1                   | 11 | TNNI3K      | TNNI3K  | > | 10000 |
| UNC10225455A | Brc1cc2c(NC(=O)C3CC3)n[nH]c2nc1-c1cccc1                   | 11 | YSK4        | MAP3K19 | = | 200   |
| UNC10225462A | O=S(=O)(N1CCCC1)c1ccc(cc1)-c1ccnc2[nH]ccc12               | 1  | BIKE        | BMP2K   | = | 7200  |
| UNC10225462A | O=S(=O)(N1CCCC1)c1ccc(cc1)-c1ccnc2[nH]ccc12               | 1  | IKK-beta    | IKBKB   | = | 270   |
| UNC10225462A | O=S(=O)(N1CCCC1)c1ccc(cc1)-c1ccnc2[nH]ccc12               | 1  | JAK2(JH1do  | JAK2    | = | 360   |
| UNC10225462A | O=S(=O)(N1CCCC1)c1ccc(cc1)-c1ccnc2[nH]ccc12               | 1  | PKAC-alpha  | PRKACA  | = | 260   |
| UNC10225462A | O=S(=O)(N1CCCC1)c1ccc(cc1)-c1ccnc2[nH]ccc12               | 1  | RIOK1       | RIOK1   | = | 610   |
| UNC10225462A | O=S(=O)(N1CCCC1)c1ccc(cc1)-c1ccnc2[nH]ccc12               | 1  | RIOK2       | RIOK2   | = | 960   |
| UNC10225462A | O=S(=O)(N1CCCC1)c1ccc(cc1)-c1ccnc2[nH]ccc12               | 1  | RIOK3       | RIOK3   | = | 540   |
| UNC10225462A | O=S(=O)(N1CCCC1)c1ccc(cc1)-c1ccnc2[nH]ccc12               | 1  | ROCK1       | ROCK1   | = | 330   |
| UNC10225462A | O=S(=O)(N1CCCC1)c1ccc(cc1)-c1ccnc2[nH]ccc12               | 1  | ROCK2       | ROCK2   | = | 350   |
| UNC10225463A | Cl.Cl.C1CC(CCN1)Oc1cc2cnccc2cc1-c1cccc1                   | 6  | DAPK1       | DAPK1   | = | 300   |
| UNC10225463A | Cl.Cl.C1CC(CCN1)Oc1cc2cnccc2cc1-c1cccc1                   | 6  | DAPK3       | DAPK3   | = | 170   |
| UNC10225463A | Cl.Cl.C1CC(CCN1)Oc1cc2cnccc2cc1-c1cccc1                   | 6  | HASPIN      | GSG2    | = | 90    |
| UNC10225463A | Cl.Cl.C1CC(CCN1)Oc1cc2cnccc2cc1-c1cccc1                   | 6  | IKK-beta    | IKBKB   | = | 24    |
| UNC10225463A | Cl.Cl.C1CC(CCN1)Oc1cc2cnccc2cc1-c1cccc1                   | 6  | PRKCE       | PRKCE   | = | 640   |
| UNC10225463A | Cl.Cl.C1CC(CCN1)Oc1cc2cnccc2cc1-c1cccc1                   | 6  | PRKCH       | PRKCH   | = | 390   |
| UNC10225463A | Cl.Cl.C1CC(CCN1)Oc1cc2cnccc2cc1-c1cccc1                   | 6  | ROCK1       | ROCK1   | = | 130   |
| UNC10225463A | Cl.Cl.C1CC(CCN1)Oc1cc2cnccc2cc1-c1cccc1                   | 6  | ROCK2       | ROCK2   | = | 180   |
| UNC10225463A | Cl.Cl.C1CC(CCN1)Oc1cc2cnccc2cc1-c1cccc1                   | 6  | STK33       | STK33   | > | 10000 |
| UNC10225463A | Cl.Cl.C1CC(CCN1)Oc1cc2cnccc2cc1-c1cccc1                   | 6  | STK36       | STK36   | > | 10000 |
| UNC10225464A | Clc1ccc(cc1)C1=C(Nc2cccc(Cl)c2)C(=O)NC1=O                 | 6  | CDK4        | CDK4    | > | 10000 |
| UNC10225464A | Clc1ccc(cc1)C1=C(Nc2cccc(Cl)c2)C(=O)NC1=O                 | 6  | CLK1        | CLK1    | = | 4400  |
| UNC10225464A | Clc1ccc(cc1)C1=C(Nc2cccc(Cl)c2)C(=O)NC1=O                 | 6  | CSNK1G3     | CSNK1G3 | > | 10000 |
| UNC10225464A | Clc1ccc(cc1)C1=C(Nc2cccc(Cl)c2)C(=O)NC1=O                 | 6  | PIK3CB      | PIK3CB  | = | 160   |
| UNC10225464A | Clc1ccc(cc1)C1=C(Nc2cccc(Cl)c2)C(=O)NC1=O                 | 6  | PKAC-beta   | PRKACB  | > | 10000 |
| UNC10225464A | Clc1ccc(cc1)C1=C(Nc2cccc(Cl)c2)C(=O)NC1=O                 | 6  | RPS6KA4(Kii | RPS6KA4 | > | 10000 |
| UNC10225464A | Clc1ccc(cc1)C1=C(Nc2cccc(Cl)c2)C(=O)NC1=O                 | 6  | VPS34       | PIK3C3  | = | 300   |
| UNC10225464A | Clc1ccc(cc1)C1=C(Nc2cccc(Cl)c2)C(=O)NC1=O                 | 6  | VRK2        | VRK2    | > | 10000 |
| UNC10225468A | Nc1n[nH]c2ncc(cc12)-c1cccc1                               | 2  | KIT         | KIT     | = | 92    |
| UNC10225468A | Nc1n[nH]c2ncc(cc12)-c1cccc1                               | 2  | MEK5        | MAP2K5  | = | 660   |
| UNC10225468A | Nc1n[nH]c2ncc(cc12)-c1cccc1                               | 2  | MKNK2       | MKNK2   | = | 260   |
| UNC10225468A | Nc1n[nH]c2ncc(cc12)-c1cccc1                               | 2  | PDGFRB      | PDGFRB  | = | 200   |
| UNC10225468A | Nc1n[nH]c2ncc(cc12)-c1cccc1                               | 2  | TYK2(JH2do  | TYK2    | = | 950   |
| UNC10225473A | CN(C1CCOCC1)C(=O)c1ccc(cc1)-c1cc(ccn1)-c1c[nH]nc1-c1cccc1 | 1  | VRK2        | VRK2    | > | 10000 |
| UNC10225474A | CCn1c(nc2cnccc12)-c1ccoc1                                 | 6  | GRK7        | GRK7    | > | 10000 |
| UNC10225474A | CCn1c(nc2cnccc12)-c1ccoc1                                 | 6  | INSR        | INSR    | > | 10000 |
| UNC10225474A | CCn1c(nc2cnccc12)-c1ccoc1                                 | 6  | TAK1        | MAP3K7  | > | 10000 |
| UNC10225475A | COc1ccc(NC(=O)c2ccc(cc2)-c2cc(ccc2C)-c2nnc(C)o2)cc1       | 3  | CLK3        | CLK3    | > | 10000 |
| UNC10225475A | COc1ccc(NC(=O)c2ccc(cc2)-c2cc(ccc2C)-c2nnc(C)o2)cc1       | 3  | GRK3        | ADRBK2  | > | 10000 |
| UNC10225475A | COc1ccc(NC(=O)c2ccc(cc2)-c2cc(ccc2C)-c2nnc(C)o2)cc1       | 3  | p38-alpha   | MAPK14  | = | 180   |
| UNC10225477A | Cc1cccc(n1)-c1nc(Nc2ccc3ncsc3c2)c2cccc2n1                 | 2  | PRKD1       | PRKD1   | = | 16    |
| UNC10225477A | Cc1cccc(n1)-c1nc(Nc2ccc3ncsc3c2)c2cccc2n1                 | 2  | PRKD2       | PRKD2   | = | 22    |
| UNC10225480A | Cc1cccc(n1)-c1nc(Nc2ccc3n(C)nccc3c2)c2cccc2n1             | 6  | MAST1       | MAST1   | > | 10000 |

|              |                                                                     |    |            |         |   |       |
|--------------|---------------------------------------------------------------------|----|------------|---------|---|-------|
| UNC10225480A | Cc1cccc(n1)-c1nc(Nc2ccc3n(C)ccc3c2)c2cccc2n1                        | 6  | MKNK1      | MKNK1   | > | 10000 |
| UNC10225480A | Cc1cccc(n1)-c1nc(Nc2ccc3n(C)ccc3c2)c2cccc2n1                        | 6  | PIKFYVE    | PIKFYVE | = | 380   |
| UNC10225480A | Cc1cccc(n1)-c1nc(Nc2ccc3n(C)ccc3c2)c2cccc2n1                        | 6  | PRKD1      | PRKD1   | = | 7.2   |
| UNC10225480A | Cc1cccc(n1)-c1nc(Nc2ccc3n(C)ccc3c2)c2cccc2n1                        | 6  | PRKD2      | PRKD2   | = | 12    |
| UNC10225480A | Cc1cccc(n1)-c1nc(Nc2ccc3n(C)ccc3c2)c2cccc2n1                        | 6  | PRKD3      | PRKD3   | = | 13    |
| UNC10225482A | Cl.Oc1ccc(cc1)-c1nc([nH]c1-c1ccncc1)-c1cccc1                        | 4  | ADCK4      | ADCK4   | > | 10000 |
| UNC10225482A | Cl.Oc1ccc(cc1)-c1nc([nH]c1-c1ccncc1)-c1cccc1                        | 4  | BUB1       | BUB1    | = | 560   |
| UNC10225482A | Cl.Oc1ccc(cc1)-c1nc([nH]c1-c1ccncc1)-c1cccc1                        | 4  | TYK2(JH1do | TYK2    | > | 10000 |
| UNC10225486A | CSc1ccc(cc1)-c1nc2CCn2c1-c1ccncc1                                   | 0  | BUB1       | BUB1    | = | 260   |
| UNC10225488A | Cl.C(c1cccc1)n1ccc2cc(Nc3ncnc4cccc34)ccc12                          | 9  | EGFR       | EGFR    | = | 5     |
| UNC10225488A | Cl.C(c1cccc1)n1ccc2cc(Nc3ncnc4cccc34)ccc12                          | 9  | ERBB2      | ERBB2   | = | 14    |
| UNC10225488A | Cl.C(c1cccc1)n1ccc2cc(Nc3ncnc4cccc34)ccc12                          | 9  | ERBB4      | ERBB4   | = | 140   |
| UNC10225488A | Cl.C(c1cccc1)n1ccc2cc(Nc3ncnc4cccc34)ccc12                          | 9  | JAK2(JH1do | JAK2    | > | 10000 |
| UNC10225488A | Cl.C(c1cccc1)n1ccc2cc(Nc3ncnc4cccc34)ccc12                          | 9  | MEK5       | MAP2K5  | = | 770   |
| UNC10225489A | C[C@@H]1CC[C@@H](CN1c1cc(nc(N)n1)-c1ccc2c(N)n[nH]c2c1)C(=O)NC1CCCC1 | 7  | EPHB6      | EPHB6   | = | 49    |
| UNC10225489A | C[C@@H]1CC[C@@H](CN1c1cc(nc(N)n1)-c1ccc2c(N)n[nH]c2c1)C(=O)NC1CCCC1 | 7  | PDPK1      | PDPK1   | = | 2.8   |
| UNC10225489A | C[C@@H]1CC[C@@H](CN1c1cc(nc(N)n1)-c1ccc2c(N)n[nH]c2c1)C(=O)NC1CCCC1 | 7  | PIP5K1A    | PIP5K1A | = | 440   |
| UNC10225489A | C[C@@H]1CC[C@@H](CN1c1cc(nc(N)n1)-c1ccc2c(N)n[nH]c2c1)C(=O)NC1CCCC1 | 7  | PRKX       | PRKX    | = | 460   |
| UNC10225489A | C[C@@H]1CC[C@@H](CN1c1cc(nc(N)n1)-c1ccc2c(N)n[nH]c2c1)C(=O)NC1CCCC1 | 7  | RIOK1      | RIOK1   | = | 210   |
| UNC10225489A | C[C@@H]1CC[C@@H](CN1c1cc(nc(N)n1)-c1ccc2c(N)n[nH]c2c1)C(=O)NC1CCCC1 | 7  | RIOK3      | RIOK3   | = | 150   |
| UNC10225489A | C[C@@H]1CC[C@@H](CN1c1cc(nc(N)n1)-c1ccc2c(N)n[nH]c2c1)C(=O)NC1CCCC1 | 7  | ROCK1      | ROCK1   | = | 210   |
| UNC10225489A | C[C@@H]1CC[C@@H](CN1c1cc(nc(N)n1)-c1ccc2c(N)n[nH]c2c1)C(=O)NC1CCCC1 | 7  | ROCK2      | ROCK2   | = | 150   |
| UNC10225491A | Cc1cccc1COc1cc(sc1C(N)=O)-n1cnc2cc(Cl)ccc12                         | 3  | LRRK2      | LRRK2   | > | 10000 |
| UNC10225491A | Cc1cccc1COc1cc(sc1C(N)=O)-n1cnc2cc(Cl)ccc12                         | 3  | PLK1       | PLK1    | = | 19    |
| UNC10225491A | Cc1cccc1COc1cc(sc1C(N)=O)-n1cnc2cc(Cl)ccc12                         | 3  | PLK2       | PLK2    | = | 68    |
| UNC10225491A | Cc1cccc1COc1cc(sc1C(N)=O)-n1cnc2cc(Cl)ccc12                         | 3  | PLK3       | PLK3    | = | 99    |
| UNC10225491A | Cc1cccc1COc1cc(sc1C(N)=O)-n1cnc2cc(Cl)ccc12                         | 3  | VPS34      | PIK3C3  | > | 10000 |
| UNC10225492A | Fc1ccc(Nc2nccc(NCCNC(=O)Nc3ccc4OCOc4c3)n2)cc1                       | 4  | JAK2(JH1do | JAK2    | = | 2000  |
| UNC10225492A | Fc1ccc(Nc2nccc(NCCNC(=O)Nc3ccc4OCOc4c3)n2)cc1                       | 4  | TESK1      | TESK1   | > | 10000 |
| UNC10225492A | Fc1ccc(Nc2nccc(NCCNC(=O)Nc3ccc4OCOc4c3)n2)cc1                       | 4  | TXK        | TXK     | > | 10000 |
| UNC10225492A | Fc1ccc(Nc2nccc(NCCNC(=O)Nc3ccc4OCOc4c3)n2)cc1                       | 4  | ZAK        | ZAK     | > | 10000 |
| UNC10225493A | Cl.Cc1nccc(n1)-c1c(ncn1CCCN1CCOCC1)-c1ccc(F)cc1                     | 9  | CDC2L1     | CDK11B  | > | 10000 |
| UNC10225493A | Cl.Cc1nccc(n1)-c1c(ncn1CCCN1CCOCC1)-c1ccc(F)cc1                     | 9  | CDK9       | CDK9    | > | 10000 |
| UNC10225493A | Cl.Cc1nccc(n1)-c1c(ncn1CCCN1CCOCC1)-c1ccc(F)cc1                     | 9  | CSNK1D     | CSNK1D  | = | 75    |
| UNC10225493A | Cl.Cc1nccc(n1)-c1c(ncn1CCCN1CCOCC1)-c1ccc(F)cc1                     | 9  | CSNK1E     | CSNK1E  | = | 460   |
| UNC10225493A | Cl.Cc1nccc(n1)-c1c(ncn1CCCN1CCOCC1)-c1ccc(F)cc1                     | 9  | DAPK2      | DAPK2   | > | 10000 |
| UNC10225493A | Cl.Cc1nccc(n1)-c1c(ncn1CCCN1CCOCC1)-c1ccc(F)cc1                     | 9  | ERK4       | MAPK4   | > | 10000 |
| UNC10225493A | Cl.Cc1nccc(n1)-c1c(ncn1CCCN1CCOCC1)-c1ccc(F)cc1                     | 9  | PHKG2      | PHKG2   | > | 10000 |
| UNC10225493A | Cl.Cc1nccc(n1)-c1c(ncn1CCCN1CCOCC1)-c1ccc(F)cc1                     | 9  | RPS6KA4(Ki | RPS6KA4 | > | 10000 |
| UNC10225493A | Cl.Cc1nccc(n1)-c1c(ncn1CCCN1CCOCC1)-c1ccc(F)cc1                     | 9  | TIE2       | TEK     | > | 10000 |
| UNC10225494A | Nc1nccc2sc(-c3ccc4N(CCc4c3)C(=O)Cc3cc(F)ccc3F)c12                   | 1  | CLK3       | CLK3    | > | 10000 |
| UNC10225494A | Nc1nccc2sc(-c3ccc4N(CCc4c3)C(=O)Cc3cc(F)ccc3F)c12                   | 1  | RIPK1      | RIPK1   | = | 570   |
| UNC10225497A | Cn1cncc1-c1ccc2nenc(Nc3ccc(OCc4cccc4)cc3)c2c1                       | 12 | AURKB      | AURKB   | > | 10000 |
| UNC10225497A | Cn1cncc1-c1ccc2nenc(Nc3ccc(OCc4cccc4)cc3)c2c1                       | 12 | CLK3       | CLK3    | > | 10000 |
| UNC10225497A | Cn1cncc1-c1ccc2nenc(Nc3ccc(OCc4cccc4)cc3)c2c1                       | 12 | CSNK1E     | CSNK1E  | > | 10000 |
| UNC10225497A | Cn1cncc1-c1ccc2nenc(Nc3ccc(OCc4cccc4)cc3)c2c1                       | 12 | EGFR       | EGFR    | = | 49    |
| UNC10225497A | Cn1cncc1-c1ccc2nenc(Nc3ccc(OCc4cccc4)cc3)c2c1                       | 12 | EIF2AK1    | EIF2AK1 | > | 10000 |

|              |                                                     |    |            |         |   |       |
|--------------|-----------------------------------------------------|----|------------|---------|---|-------|
| UNC10225497A | Cn1cncc1-c1ccc2ncnc(Nc3ccc(OCc4ccccc4)cc3)c2c1      | 12 | ERBB2      | ERBB2   | = | 41    |
| UNC10225497A | Cn1cncc1-c1ccc2ncnc(Nc3ccc(OCc4ccccc4)cc3)c2c1      | 12 | MEK5       | MAP2K5  | = | 450   |
| UNC10225497A | Cn1cncc1-c1ccc2ncnc(Nc3ccc(OCc4ccccc4)cc3)c2c1      | 12 | RIPK2      | RIPK2   | = | 91    |
| UNC10225497A | Cn1cncc1-c1ccc2ncnc(Nc3ccc(OCc4ccccc4)cc3)c2c1      | 12 | SNRK       | SNRK    | = | 8700  |
| UNC10225497A | Cn1cncc1-c1ccc2ncnc(Nc3ccc(OCc4ccccc4)cc3)c2c1      | 12 | YANK1      | STK32A  | > | 10000 |
| UNC10225499A | Cc1cccc(c1)-c1cc(ccn1)-c1c[nH]nc1-c1cccn1           | 1  | GAK        | GAK     | = | 130   |
| UNC10225501A | Cc1nnc(o1)-c1ccc(C)c(c1)-c1ccc(cc1)C(O)=O           | 1  | LOK        | STK10   | > | 10000 |
| UNC10225502A | Clc1cccc(Cl)c1C(=O)c1c[nH]c(c1)C(=O)NCc1cccs1       | 1  | FAK        | PTK2    | > | 10000 |
| UNC10225504A | Cl.COC1cc2ncnc(Nc3ccc4nc([nH]c4c3)-c3ccccc3)c2cc1OC | 5  | AURKA      | AURKA   | = | 2300  |
| UNC10225504A | Cl.COC1cc2ncnc(Nc3ccc4nc([nH]c4c3)-c3ccccc3)c2cc1OC | 5  | CSNK2A2    | CSNK2A2 | > | 10000 |
| UNC10225504A | Cl.COC1cc2ncnc(Nc3ccc4nc([nH]c4c3)-c3ccccc3)c2cc1OC | 5  | INSR       | INSR    | > | 10000 |
| UNC10225504A | Cl.COC1cc2ncnc(Nc3ccc4nc([nH]c4c3)-c3ccccc3)c2cc1OC | 5  | MEK5       | MAP2K5  | = | 670   |
| UNC10225504A | Cl.COC1cc2ncnc(Nc3ccc4nc([nH]c4c3)-c3ccccc3)c2cc1OC | 5  | PLK4       | PLK4    | = | 1600  |
| UNC10243860A | OCC1                                                | 1  | PIK3CB     | PIK3CB  | = | 51    |
| UNC10243861A | Cc1c(Cn2ccn3c2nc(cc3=O)N2CCOCC2)cccc1C(F)(F)F       | 3  | AKT3       | AKT3    | > | 10000 |
| UNC10243861A | Cc1c(Cn2ccn3c2nc(cc3=O)N2CCOCC2)cccc1C(F)(F)F       | 3  | CAMK2A     | CAMK2A  | > | 10000 |
| UNC10243861A | Cc1c(Cn2ccn3c2nc(cc3=O)N2CCOCC2)cccc1C(F)(F)F       | 3  | JAK1(JH1do | JAK1    | > | 10000 |
| UNC10243861A | Cc1c(Cn2ccn3c2nc(cc3=O)N2CCOCC2)cccc1C(F)(F)F       | 3  | PIK3CB     | PIK3CB  | = | 1.5   |
| UNC10243861A | Cc1c(Cn2ccn3c2nc(cc3=O)N2CCOCC2)cccc1C(F)(F)F       | 3  | PIK3CD     | PIK3CD  | = | 170   |
| UNC10243861A | Cc1c(Cn2ccn3c2nc(cc3=O)N2CCOCC2)cccc1C(F)(F)F       | 3  | VPS34      | PIK3C3  | = | 64    |
| UNC10243862A | CNc1ncnc2[nH]ncc12                                  | 1  | ROCK1      | ROCK1   | = | 380   |
| UNC10243862A | CNc1ncnc2[nH]ncc12                                  | 1  | ROCK2      | ROCK2   | = | 330   |
| UNC10243863A | Nc1ncnc2[nH]c(nc12)-c1ccccc1                        | 11 | AURKA      | AURKA   | > | 10000 |
| UNC10243863A | Nc1ncnc2[nH]c(nc12)-c1ccccc1                        | 11 | CSNK2A2    | CSNK2A2 | = | 1100  |
| UNC10243863A | Nc1ncnc2[nH]c(nc12)-c1ccccc1                        | 11 | EIF2AK1    | EIF2AK1 | > | 10000 |
| UNC10243863A | Nc1ncnc2[nH]c(nc12)-c1ccccc1                        | 11 | LTK        | LTK     | > | 10000 |
| UNC10243863A | Nc1ncnc2[nH]c(nc12)-c1ccccc1                        | 11 | MST1       | STK4    | > | 10000 |
| UNC10243863A | Nc1ncnc2[nH]c(nc12)-c1ccccc1                        | 11 | PAK3       | PAK3    | > | 10000 |
| UNC10243863A | Nc1ncnc2[nH]c(nc12)-c1ccccc1                        | 11 | PLK4       | PLK4    | > | 10000 |
| UNC10243863A | Nc1ncnc2[nH]c(nc12)-c1ccccc1                        | 11 | SNRK       | SNRK    | > | 10000 |
| UNC10243863A | Nc1ncnc2[nH]c(nc12)-c1ccccc1                        | 11 | TYK2(JH2do | TYK2    | = | 96    |
| UNC10243863A | Nc1ncnc2[nH]c(nc12)-c1ccccc1                        | 11 | YANK1      | STK32A  | > | 10000 |
| UNC10243863A | Nc1ncnc2[nH]c(nc12)-c1ccccc1                        | 11 | YSK4       | MAP3K19 | = | 270   |
| UNC10243881A | CSc1nn2c(nc(cc2=O)N2CCOCC2)n1Cc1cccc(c1C)C(F)(F)F   | 3  | PIK3CB     | PIK3CB  | = | 0.26  |
| UNC10243881A | CSc1nn2c(nc(cc2=O)N2CCOCC2)n1Cc1cccc(c1C)C(F)(F)F   | 3  | PIK3CD     | PIK3CD  | = | 47    |
| UNC10243881A | CSc1nn2c(nc(cc2=O)N2CCOCC2)n1Cc1cccc(c1C)C(F)(F)F   | 3  | VPS34      | PIK3C3  | = | 33    |
