# Supplementary material for: Progress towards a public chemogenomic set for protein kinases and a call for contributions
Source: PLoS One. 2017 Aug 2;12(8):e0181585. doi: 10.1371/journal.pone.0181585 (PMC5540273; doi:10.1371/journal.pone.0181585)
Supplement: S4 Table — (XLSX) [file pone.0181585.s004.xlsx]

## Sheet: Table 4 - PKIS2 %Inh
Regno	Compound	Chemotype	Smiles	>90	>80	>70	AAK1	ABL1-nonphosphorylated	ABL1-phosphorylated	ABL2	ACVR1	ACVR1B	ACVR2A	ACVR2B	ACVRL1	ADCK3	ADCK4	AKT1	AKT2	AKT3	ALK	AMPK-alpha1	AMPK-alpha2	ANKK1	ARK5	ASK1	ASK2	AURKA	AURKB	AURKC	AXL	BIKE	BLK	BMPR1A	BMPR1B	BMPR2	BMX	BRAF	BRK	BRSK1	BRSK2	BTK	BUB1	CAMK1	CAMK1B	CAMK1D	CAMK1G	CAMK2A	CAMK2B
GSK2358994	UNC10225469A	morpholino-triazolo-pyrimidinones	Clc1cccc(Cn2c(nn3c2nc(cc3=O)N2CCOCC2)C2CC2)c1Cl	2	3	3	14	28	20	5	0	0	0	0	9	11	0	12	0	0	0	5	0	0	0	0	0	0	4	0	3	0	0	15	0	13	19	0	0	3	0	0	0	0	0	0	5	25	10
GSK2593074	UNC10225012A	4-amino-3-aryl-thienopyridine and analogues	Cn1cc(cn1)-c1cnc(N)c2c(csc12)-c1ccc2N(CCc2c1)C(=O)Cc1ccccc1	27	36	42	0	99.7	89	81	7	9	0	0	0	7	0	14	0	8	0	17	0	0	3	21	17	24	97.8	92.2	95.9	0	93	1	6	6	57	0	92.2	0	7	0	0	0	0	11	0	29	12
GSK350559	UNC10225159A	4-pyrimidinyl_ortho-aryl_azoles	CS(=O)(=O)Cc1ccc(Nc2nccc(n2)-c2c(nn3ncccc23)-c2cccc(NC(=O)C3CCCCC3)c2)cc1	5	10	12	0	8	15	5	18	0	0	0	0	24	0	23	4	0	29	2	2	0	0	0	34	9	15	49	18	1	0	0	19	24	37	20	2	0	0	0	98.7	0	0	0	0	15	8
GSK361065	UNC10225310A	4-pyrimidinyl_ortho-aryl_azoles	COc1cccc(OC)c1C(=O)Nc1cccc(c1)-c1nn2ccccc2c1-c1ccnc(Nc2cccc(F)c2)n1	12	19	19	0	28	18	100	17	15	7	27	7	0	0	4	0	0	0	25	4	93.2	0	22	0	32	0	70	30	0	41	9	21	0	21	17	19	0	16	0	11	19	0	13	0	27	6
GSK955403	UNC10225187A	diarylurea	Cc1ccc(NC(=O)Nc2cccc(c2)C(F)(F)F)cc1	3	4	4	26	49	23	3	10	85	2	0	0	5	0	12	3	0	0	0	0	0	0	20	0	0	0	19	0	4	0	94.6	0	1	0	0	0	0	0	0	0	7	0	25	10	32	25
GW345098	UNC10225062A	6-aminopurines and related	CCn1cnc2c(N)ncnc12	0	1	1	0	33	35	12	7	0	0	0	8	19	0	0	0	0	0	29	0	0	0	15	0	4	6	4	0	5	12	24	15	35	41	0	8	5	0	0	3	9	0	10	0	6	8
GW557777	UNC10225296A	4-anilinoquinoline	Cc1ccc(O)cc1Nc1ccnc2cc(ccc12)-c1ccc(CN2CCCCC2)o1	45	53	53	10	100	99.9	100	99.4	79	18	94.7	90.3	4	88	0	3	0	0	0	0	0	0	37	0	0	0	15	0	4	99.7	61	99.9	0	50	22	99.5	0	0	19	0	4	0	4	6	0	13
GW630823	UNC10225430A	4-anilinoquinoline	Cc1ccc(O)cc1Nc1cc(nc2ccc(cc12)-c1ccncc1)C(F)(F)F	1	2	2	0	21	7	14	11	0	0	0	0	10	0	5	1	0	0	0	0	0	0	30	0	0	0	5	0	7	12	0	0	0	17	0	11	3	0	0	0	8	0	14	1	20	2
GW857175	UNC10225266A	2-aryl-4-anilino(pyridin-4-yl)-quinazoline and analogues	Cc1cccc(n1)-c1nc(Nc2ccc3[nH]ncc3c2)c2ccccc2n1	7	9	12	0	19	14	3	0	100	0	0	0	0	0	29	55	0	19	0	2	0	1	0	13	0	3	22	26	33	3	60	34	18	15	16	2	0	0	10	65	0	0	0	0	15	3
GW869979	UNC10225324A	benzimidazole_N-thiophenes	COc1cc2ncn(-c3cc(OCc4ccc(cc4)S(C)(=O)=O)c(s3)C(N)=O)c2cc1OC	3	4	4	0	0	13	14	51	0	0	0	4	31	0	0	0	0	26	0	0	20	0	18	37	0	0	0	31	0	46	11	30	8	6	6	0	4	0	0	28	0	0	0	0	3	6
0	PFE-PKIS 1	biaryl pyridinone	O=C1C(Br)=C(OCC2=C(F)C=C(F)C=C2)C=C(C)N1C3=CC(C(NCC(N)=O)=O)=CC=C3C	2	2	0	0	57	33	27	11	11	0	4	28	27	2	29	19	0	0	30	11	0	0	12	0	0	0	8	11	7	14	2	0	0	24	0	23	11	39	0	0	44	10	36	0	9	1
0	PFE-PKIS 10	2-amino-3-alkoxypyridine	C[C@@H](OC1=C(N)N=CC(C2=C(C#N)N(C)N=C2C3)=C1)C4=CC(F)=CC=C4C(N3C)=O	19	24	27	0	56	33	14	0	8	11	0	0	26	0	22	11	0	100	29	11	0	24	28	0	7	4	0	42	0	31	2	0	0	37	0	39	3	24	0	0	29	49	33	0	5	2
0	PFE-PKIS 11	indoloquinoline	N#CC1=CC(N2)=C(C=C1)C3=C2C4=CC(OC)=C(OCCOCCOC)C=C4N=C3	34	53	67	92.1	70	53	2	0	0	6	0	0	29	0	5	0	0	0	30	1	63	12	6	0	51	83	62	44	100	21	0	0	0	35	0	18	0	12	0	96.7	26	14	25	1	85	57
0	PFE-PKIS 12	2,4-diamino-5-carboxamide pyrimidines	O=C(NCCCN1CCOC1=O)C2=CN=C(NCC3=C(Cl)C=CC(Cl)=C3)N=C2NC4CCCC4	1	1	4	2	73	25	22	14	0	5	19	24	24	18	12	4	0	0	14	14	0	9	9	0	17	14	15	61	12	22	16	0	0	22	0	21	0	23	0	5	33	21	27	0	0	2
0	PFE-PKIS 13	2-anilino-4-amino-pyrimidine	O=C(CC1)NC(C1=C2)=CC=C2NC3=NC(NCC4=CC(S(C)(=O)=O)=CC=C4)=C(C(F)(F)F)C=N3	20	32	39	21	54	16	0	0	0	0	0	0	0	4	0	0	0	0	7	0	3	86	0	0	97.8	96.7	71	23	82	0	0	0	39	0	0	0	0	0	0	0	0	0	8	0	0	0
0	PFE-PKIS 14	thienopyrimidine	NC(C(C=C1)=CC=C1C2=CC3=NC=NC(SCC(O)=O)=C3S2)=O	8	11	20	4	57	20	0	0	0	8	17	0	25	3	0	0	0	0	0	0	0	0	0	0	0	80	33	0	1	0	0	1	0	15	0	0	0	0	8	18	0	0	5	0	0	0
0	PFE-PKIS 15	Type 3 Mek	FC1=C(F)C(Br)=CC(C(NOCC2CC2)=O)=C1NC3=CC=C(I)C=C3Cl	0	0	0	0	52	0	0	0	0	2	0	0	7	0	0	0	0	0	4	0	0	12	0	0	0	1	0	2	0	0	0	0	0	0	0	0	0	0	0	0	0	0	0	0	0	0
0	PFE-PKIS 16	indoloquinoline	N#CC1=CC(N2)=C(C=C1)C3=C2C4=CC(OC)=C(OCCN5CCN(C)CC5)C=C4N=C3	48	60	71	96.2	82	69	6	0	0	10	0	0	0	3	0	18	0	0	10	0	54	22	0	0	0	70	33	26	100	4	0	0	0	0	0	23	4	0	0	100	0	19	44	16	93.5	70
0	PFE-PKIS 17	benzothiophene diazapinone	O=C(N[C@H](C)CN1)C2=C1C3=C(C=CC(C4=CC=C(O)C=C4)=N5)C5=CC=C3S2	19	27	33	29	48	10	3	11	22	8	52	45	0	10	0	0	0	16	30	0	0	0	91	0	42	24	0	87	0	0	27	0	7	14	0	0	48	72	0	58	16	13	0	16	35	36
0	PFE-PKIS 18	2-anilino-4-amino-pyrimidine	CS(C1=CC(CNC2=NC(NC3=CC=C(N(C(C)C)C(C4)=O)C4=C3)=NC=C2C(F)(F)F)=CC=C1)(=O)=O	14	26	29	27	43	0	4	13	0	16	51	0	0	9	0	0	0	0	0	0	38	62	0	0	97.3	81	43	30	68	0	0	21	17	11	0	0	0	0	0	26	0	3	0	0	22	14
0	PFE-PKIS 19	pyrolopyridinone	O=C1C2=C(NC(C3=CC=NC=C3)=C2)CCN1	28	36	46	77	31	0	0	14	40	40	70	19	33	0	0	0	0	0	6	0	10	0	40	0	28	0	11	8	33	15	27	92.9	43	35	0	0	0	6	0	20	13	1	11	0	9	10
0	PFE-PKIS 2	morpholino thiophene	ClC(C=C1)=CC=C1C2=C(C3=CC=NN3)SC(N4CCOCC4)=C2C#N	1	3	4	70	42	0	9	0	15	0	0	0	12	0	0	0	0	0	9	0	0	0	0	0	44	4	0	0	0	0	21	0	17	14	0	8	0	18	8	13	24	12	19	72	0	0
0	PFE-PKIS 20	biaryl pyridinones	CC1=CC(OCC2=C(F)C=C(F)C=C2)=C(Br)C(N1C3=C(C)C=CC(C(N4C[C@H](O)CC4)=O)=C3)=O	9	12	17	0	92.1	90.5	72	0	12	31	0	0	0	66	0	0	0	0	2	0	0	0	0	0	0	0	0	0	0	70	0	54	0	0	58	20	0	0	0	0	0	0	17	0	0	0
0	PFE-PKIS 21	Type 3 Mek	FC1=C(F)C=CC(C(NOC[C@H](O)CO)=O)=C1NC2=CC=C(I)C=C2F	2	2	2	0	20	8	0	0	0	0	0	0	24	0	2	0	0	0	0	0	0	0	0	0	0	0	0	0	0	0	9	0	0	16	0	0	0	0	0	0	0	4	7	0	0	0
0	PFE-PKIS 22	2-anilino-4-amino-pyrimidine	O=S(C1=CC(CNC2=C(C(F)(F)F)C=NC(NC3=CC=C4C([C@@H]5C[C@@H]4CNC5=O)=C3)=N2)=CC=C1)(C)=O	51	71	87	92.6	97.9	93.2	66	0	0	0	0	0	0	0	0	0	0	0	37	28	22	94.6	0	0	99.4	95.7	73	93.2	96.2	30	0	0	0	4	0	0	0	0	0	0	1	19	0	0	0	0
0	PFE-PKIS 23	2-anilino-4-amino-pyrimidine	CN(S(C)(=O)=O)C1=CC(CNC2=C(C(F)(F)F)C=NC(NC3=CC=C4C(CC(N4)=O)=C3)=N2)=CC=C1	18	27	44	51	46	3	16	0	0	0	0	0	0	29	0	0	0	41	26	5	0	99.3	0	0	93.8	99.4	88	64	95	0	0	0	39	18	0	0	0	0	0	2	0	9	14	15	0	0
0	PFE-PKIS 24	indoloquinoline	N#CC1=CC(N2)=C(C=C1)C3=C2C4=CC(OC)=C(OCCN5CCNCC5)C=C4N=C3	45	59	65	96.2	68	55	8	0	0	0	0	0	13	5	0	0	0	26	15	4	37	22	0	16	21	65	9	32	97.8	0	12	22	19	17	28	0	25	0	2	99	10	28	30	14	96.8	86
0	PFE-PKIS 25	4-amino-pyrolopyrimidine	CN([C@H]1CN(C(CC#N)=O)CC[C@H]1C)C2=C3C(NC=C3)=NC=N2	8	8	10	0	4	0	0	0	19	0	3	0	0	0	0	0	0	5	0	0	0	0	0	0	0	0	3	0	17	27	53	0	0	0	0	0	0	0	0	0	21	2	23	0	0	0
0	PFE-PKIS 26	2-anilino-4-amino-pyrimidine	O=C1CC2=CC(NC3=NC(NCC4=CC=CC=C4N(C)S(=O)(C)=O)=C(C(F)(F)F)C=N3)=CC=C2N1	34	58	74	10	25	7	5	0	28	0	0	0	0	0	0	0	0	92.4	74	70	0	92.1	0	0	97.2	98.7	84	92.4	56	64	12	0	0	39	0	0	14	36	0	0	0	0	0	0	22	18
0	PFE-PKIS 27	Type 3 Mek	FC1=C(F)C=CC(C(NOCC2CC2)=O)=C1NC3=CC=C(I)C=C3Cl	3	3	3	0	0	0	0	0	0	0	0	0	0	0	0	0	0	0	0	0	0	0	0	0	0	0	20	2	43	0	0	0	0	0	0	0	0	0	0	0	0	0	0	0	0	0
0	PFE-PKIS 28	2,4-diamino-5-carboxamide pyrimidines	O=C(C1=CN=C(N=C1NC2CCNCC2)NCC3=C(C=CC(Cl)=C3)Cl)NCCCN4C(CCC4)=O	2	4	7	0	0	0	0	0	0	0	0	0	9	0	0	0	0	21	18	17	0	0	0	0	0	0	0	41	4	0	6	0	0	0	39	0	6	0	0	0	0	21	6	0	0	0
0	PFE-PKIS 29	pyrimidopyridinone	COC(N=C1)=CC=C1C2=CC3=C(C)N=C(N)N=C3N([C@H]4CC[C@H](OCCO)CC4)C2=O	8	8	8	0	0	0	0	4	9	0	0	0	0	0	6	0	1	0	5	2	0	0	11	0	0	0	7	0	22	2	5	1	0	0	0	0	28	0	0	0	0	7	0	0	0	0
0	PFE-PKIS 3	pyridopyrimidine	COC1=CC(C2=CC3=CN=C(N)N=C3N=C2NC(NC(C)(C)C)=O)=CC(OC)=C1	6	6	8	15	39	0	0	0	10	0	0	0	0	0	4	11	24	0	0	15	0	0	0	0	0	0	0	0	0	8	54	0	0	0	10	0	0	6	0	0	0	0	0	0	0	0
0	PFE-PKIS 30	indolodiazapinone	O=C1NN=CC2=C(C3=CN(C)N=C3)NC4=CC(NC([C@@H](C5CCCCC5)N)=O)=CC1=C42	96	133	153	99.5	95.7	97.5	30	58	3	81	44	0	0	0	60	45	36	91.3	94.1	81	95.7	92.2	0	0	100	99.7	99.3	99.9	100	99.5	19	87	22	13	39	14	31	61	94.2	100	49	87	90.4	0	68	15
0	PFE-PKIS 31	thienopyrimidine	O=C(O)CSC1=C2C(C=C(C3=CC=C(NC(C)=O)C=C3)S2)=NC=N1	9	12	15	44	15	3	8	0	2	4	30	27	0	0	0	28	16	7	2	0	22	0	0	0	4	97.1	32	36	19	0	8	0	7	0	4	0	28	3	0	47	0	0	0	19	55	58
0	PFE-PKIS 32	pyrimidopyridinone	CC(C1=CN=C(NC2=NC=C(N3CCNCC3)C=C2)N=C1N4C5CCCC5)=C(C(C)=O)C4=O	7	9	9	0	28	0	0	0	0	0	0	0	0	0	0	0	11	5	0	0	0	0	0	0	0	0	0	0	0	0	15	0	0	0	0	0	0	0	0	0	0	0	2	0	0	0
0	PFE-PKIS 33	benzothiophene diazapinone	O=C(N[C@H](C)CN1)C2=C1C3=C(C=CC(C4=CC=NC=C4)=N5)C5=CC=C3S2	14	18	24	49	38	11	0	0	0	1	30	10	0	0	0	18	22	33	20	0	0	0	90	0	0	17	9	81	19	0	12	7	0	0	0	0	64	59	0	77	19	0	25	0	25	23
0	PFE-PKIS 34	4-amino-pyrolopyrimidine	CN([C@H]1CN(C(CO)=O)CC[C@H]1C)C2=C3C(NC=C3)=NC=N2	9	11	11	8	35	0	0	0	13	0	0	8	0	0	0	0	7	15	5	0	0	0	0	0	0	0	0	0	19	2	23	0	0	0	0	0	13	0	0	0	0	29	0	0	0	0
0	PFE-PKIS 35	morpholino thiophene	N#CC1=C(N2CCOCC2)SC(C3=NC=NN3)=C1C4=CC=C(S(=O)(C)=O)C=C4	7	8	9	18	30	13	7	0	14	0	0	8	3	0	1	15	0	9	22	8	0	1	0	0	22	0	2	0	6	8	17	4	12	0	12	0	100	32	0	29	13	25	16	11	14	30
0	PFE-PKIS 36	3-vinyl indazole	O=C(NCC)/C=C/C1=NNC2=C1C=CC(SC3=CC=CC=C3C(NC)=O)=C2	11	15	19	29	98.5	89	24	12	24	20	15	0	4	0	6	18	3	2	7	14	5	10	0	0	86	97.4	84	76	48	7	12	30	1	18	11	15	38	24	0	48	7	9	22	20	0	0
0	PFE-PKIS 37	2-amino-3-alkoxy pyridines	ClC1=C([C@H](OC2=C(N)N=CC(C3=CN(C4CCNCC4)N=C3)=C2)C)C(Cl)=C(F)C=C1	33	48	57	31	99.6	97	69	62	60	0	10	11	5	26	0	0	0	99.8	16	14	55	89	0	0	98.6	98.3	86	98.1	86	58	18	79	17	18	10	16	27	17	0	15	0	23	0	14	12	2
0	PFE-PKIS 38	maleimide	O=C1NC(C2=C(C3=CC=CC=C3)C=C4C(C(C=C(O)C=C5)=C5N4)=C21)=O	34	47	59	90.9	58	39	18	0	25	0	0	0	8	5	0	20	96.9	8	80	80	33	39	26	3	56	76	47	4	93.8	0	14	25	16	14	12	26	82	68	0	54	6	14	22	10	0	0
0	PFE-PKIS 39	6-sub-quinoline	CN(N=C1)C=C1C(C=C2)=NN3C2=NN=C3[C@@H](C)C4=CC=C(N=CC=C5)C5=C4	10	13	14	9	43	17	1	0	12	14	0	41	0	0	13	11	6	0	15	7	41	0	7	13	19	6	18	33	19	5	39	31	4	0	0	0	22	90	6	23	24	17	21	10	22	14
0	PFE-PKIS 4	6-sub-quinoline	OCCN(N=C1)C=C1C2=CN=C(N=NN3CC4=CC=C(N=CC=C5)C5=C4)C3=N2	0	0	1	0	32	0	0	0	51	0	0	0	0	0	0	0	45	0	3	0	0	0	19	0	0	0	0	0	0	4	7	0	0	0	1	0	22	0	0	0	0	0	4	0	0	0
0	PFE-PKIS 40	pyrimidopyridinone	O=C1N([C@@H]2CC[C@@H](O)CC2)C3=NC(N)=NC(C)=C3C=C1C4=CC=C(OC)N=C4	10	11	10	0	0	0	0	0	0	0	0	0	0	0	0	0	0	0	0	0	0	4	6	0	0	0	0	0	0	0	40	0	0	0	0	0	0	0	0	0	0	0	0	0	0	0
0	PFE-PKIS 41	biaryl pyridinones	CC1=CC(OCC2=C(F)C=C(F)C=C2)=C(Br)C(N1C3=C(C)C=CC(C(NC)=O)=C3)=O	8	8	8	0	0	0	0	0	7	0	2	0	0	0	0	2	0	0	0	5	0	0	15	0	0	0	0	0	3	0	39	0	0	0	0	0	0	0	0	0	0	0	0	0	0	0
0	PFE-PKIS 42	benzothiophene diazapinone	C[C@H](CN1)N=C(N(C)C)C2=C1C3=C(C=CC(C4=CN=C(C)C=C4)=N5)C5=CC=C3S2	1	1	1	0	0	0	0	0	0	0	0	12	0	0	0	0	0	4	0	0	0	0	0	0	0	0	0	0	0	0	0	0	0	0	0	0	0	0	0	0	0	0	0	0	0	0
0	PFE-PKIS 43	thienopyrimidine	O=C(CSC1=C2C(C=C(S2)C3=CC=C(C=C3)SC)=NC=N1)O	2	2	3	0	0	0	0	0	0	0	0	0	0	0	0	0	0	0	14	5	0	0	0	0	0	78	12	5	12	10	0	0	0	0	0	4	6	10	0	24	0	0	0	0	0	0
0	PFE-PKIS 44	pyrimidopyridinone	CC(C1=CN=C(NC2=NN(C)C=C2)N=C1N3C4CCCC4)=C(C(C)=O)C3=O	6	6	6	0	0	0	0	16	2	0	0	0	0	0	3	23	0	6	20	0	0	0	0	0	4	0	0	0	22	0	0	0	0	0	3	8	0	0	0	2	0	8	0	1	0	0
0	PFE-PKIS 45	3-vinyl indazole	O=C(NC)C1=CC=CC=C1SC2=CC(NN=C3/C=C/C4=CC(CC)=CC=N4)=C3C=C2	13	20	22	22	98	89	76	0	3	0	0	0	0	0	0	0	8	11	0	0	0	11	0	0	77	94.5	97.3	45	34	17	0	0	17	0	4	0	27	17	0	49	0	8	0	2	4	0
0	PFE-PKIS 46	2-amino-4-anilino pyrimidine	O=C(C1)NC(C1=C2)=CC=C2NC3=NC(NCC4=CC(S(=O)(C(F)(F)F)=O)=CC=C4)=NC=C3C(F)(F)F	2	2	2	8	0	0	0	3	0	0	0	0	0	2	0	1	0	0	2	0	0	22	11	0	1	13	0	2	0	1	0	18	19	0	1	0	3	0	0	34	0	11	0	2	0	0
0	PFE-PKIS 47	4-amino pyrolopyridine	CN([C@H]1CN(C(CC#N)=O)CC[C@H]1C)C2=C3C(NC=C3)=NC(C)=N2	1	1	1	0	1	2	1	8	8	15	0	5	0	0	0	1	3	0	0	0	0	0	0	0	0	0	0	9	0	18	0	10	8	0	0	0	0	0	0	0	22	0	15	1	0	5
0	PFE-PKIS 5	indoloquinoline	N#CC1=CC(N2)=C(C=C1)C3=C2C4=CC(OC)=C(OC[C@@H](O)CO)C=C4N=C3	32	48	55	78	49	21	0	0	0	0	1	0	0	0	0	0	0	15	0	0	73	0	0	0	6	52	0	17	96.2	24	5	0	0	0	0	0	0	0	0	94.3	0	27	0	0	89	61
0	PFE-PKIS 6	3-vinyl indazole	O=C(NC)C1=CC=CC=C1SC2=CC(NN=C3/C=C/C4=CC=CC=N4)=C3C=C2	18	27	33	47	99.7	98.9	88	0	21	0	0	0	0	0	0	0	0	2	15	4	0	2	0	0	97.9	99.6	66	55	89	0	35	0	0	0	15	5	34	24	0	53	9	37	11	2	26	24
0	PFE-PKIS 7	pyridopyrimidine	CCN(CC)CCCCNC(N=C1)=NC2=C1C=C(C(NC(NC(C)(C)C)=O)=N2)C3=C(Cl)C=CC=C3Cl	52	67	77	13	100	99.9	99.6	93.8	91.8	28	0	92.5	78	100	0	2	0	13	18	18	0	0	6	0	10	0	10	68	9	99.8	55	99.9	20	43	97.8	95.9	13	10	65	17	9	7	16	12	0	0
0	PFE-PKIS 8	4-amino-pyrolopyrimidine	CN([C@@H]1[C@H](C)CCN(C(N2CCCC2)=O)C1)C3=C4C(NC=C4)=NC=N3	9	13	15	31	51	9	0	0	1	3	0	0	7	0	0	3	0	0	66	77	0	16	0	0	57	31	6	7	25	0	0	13	20	1	11	0	0	5	1	25	5	18	8	5	2	0
0	PFE-PKIS 9	thienopyrimidine	O=C(O)COC1=C2C(C=C(C3=CC=C(NN=C4)C4=C3)S2)=NC=N1	5	8	10	52	33	7	0	1	31	4	0	6	0	0	0	22	17	0	13	18	12	0	0	0	45	28	0	21	0	1	19	18	63	0	19	100	5	1	0	25	0	7	0	31	0	0
0	SB-210486	4-pyridinyl_ortho-aryl_azoles	Fc1ccc(cc1)-c1ncn(CCCNCc2ccccc2)c1-c1ccncc1	3	3	3	16	25	15	12	2	10	0	0	17	0	0	19	12	0	0	22	0	0	0	11	1	19	8	0	18	0	7	13	24	16	7	16	3	0	0	0	12	2	0	4	0	21	6
0	SB-226605	4-pyrimidinyl_ortho-aryl_azoles	CCNc1nccc(n1)-c1c(ncn1C1CCN(C)CC1)-c1ccc(F)cc1	13	13	14	20	30	7	0	0	0	0	0	0	12	8	4	0	0	0	0	0	0	0	15	0	0	0	8	0	13	3	0	0	0	6	0	0	0	0	0	63	0	0	17	5	18	0
SKF-97510	UNC10225272A	6-aminopurines and related	Cc1ccccc1-n1cnc2c(N)ncnc12	6	7	7	1	100	3	0	10	0	0	0	0	8	0	8	0	0	0	0	0	0	0	7	0	0	0	0	0	0	9	0	0	0	12	0	5	0	0	0	0	0	0	5	0	24	14
SKF-97560	UNC10225284A	6-aminopurines and related	Nc1ncnc2n(cnc12)-c1cccc(F)c1	3	3	5	0	9	14	8	1	0	0	0	0	21	0	9	12	0	43	0	0	17	2	18	35	0	6	0	13	0	0	0	29	26	24	24	0	0	5	22	39	0	0	0	0	0	3
0	TPKI-100	isoquinolone	COC(=O)C1=C(C2=CC=CC=C2)C2=CC(Br)=CC=C2C(=O)N1CC1=CC=C(C=C1)S(C)(=O)=O	3	3	4	27	25	9	32	15	0	0	0	0	12	8	14	28	0	52	15	9	0	11	2	0	35	20	0	7	0	9	0	19	3	17	57	0	29	0	47	15	42	0	26	21	21	6
0	TPKI-101	isoquinolone	CCC(=O)C1=C(C2=CC=CC=C2)C2=CC(Cl)=CC=C2C(=O)N1CC1=CC=C(C=C1)C(O)=O	3	3	3	0	30	0	15	11	0	0	0	0	0	0	0	0	0	0	0	0	0	6	0	0	0	19	0	0	0	0	0	0	4	0	48	0	0	0	0	0	0	0	0	0	0	0
0	TPKI-102	isoquinolone	CCC(=O)C1=C(C2=CC=CC=C2)C2=CC(Cl)=CC=C2C(=O)N1CC1=NN(C)C(=C1)C(=O)NC1CC1	3	3	4	20	20	0	9	0	0	0	0	0	0	10	0	7	0	32	22	5	0	0	0	0	22	26	0	0	0	0	0	0	9	4	62	0	0	0	15	6	20	0	12	0	0	0
0	TPKI-103	isoquinolone	CCC(=O)C1=C(C2=CC=CC=C2)C2=CC(Cl)=CC=C2C(=O)N1CC1=NN(CC(F)F)C(=C1)S(C)(=O)=O	3	3	4	0	23	2	0	0	0	0	0	0	0	0	0	0	0	0	0	8	0	5	0	0	0	11	0	0	0	0	0	6	1	0	13	0	0	0	0	4	0	0	0	1	2	0
0	TPKI-104	isoquinolone	CCC(=O)C1=C(C2=CC=CC=C2)C2=CC(Cl)=CC=C2C(=O)N1CC1=NN(CCC(C)(C)O)C(=C1)S(C)(=O)=O	3	3	3	25	6	3	9	2	10	0	9	17	27	1	0	14	17	0	19	15	8	10	15	8	16	17	12	10	21	12	0	6	9	33	1	7	11	0	23	14	7	0	0	33	15	0
0	TPKI-105	isoquinolone	CCC(=O)C1=C(C2=CC=CC=C2)C2=CC(Cl)=CC=C2C(=O)N1CC1=NN(CC(N)=O)C(=C1)S(C)(=O)=O	3	3	4	0	44	9	0	0	0	14	0	0	29	0	0	0	0	0	0	0	0	0	0	0	0	0	0	2	0	5	0	0	0	16	0	0	0	0	0	0	3	0	21	0	0	0
0	TPKI-106	4-pyridinyl_ortho-aryl_azoles	CCC1=NC(=C(S1)C1=CC=NC=C1)C1=CC(C)=CC=C1	4	5	9	0	60	11	6	3	20	5	0	5	55	0	0	0	0	0	0	0	0	17	0	0	0	13	0	0	3	0	0	0	0	0	50	7	0	0	0	35	8	9	23	0	0	0
0	TPKI-107	4-pyridinyl_ortho-aryl_azoles	CCC1=NC(=C(S1)C1=CC(NC(=O)C2=CC=CC=C2)=NC=C1)C1=CC(C)=CC=C1	6	9	9	2	24	0	27	0	12	0	0	0	17	20	0	13	0	27	16	1	0	0	9	0	17	6	0	0	0	16	0	9	8	0	17	0	0	17	42	17	13	0	7	0	4	0
0	TPKI-108	4-pyridinyl_ortho-aryl_azoles	CCC1=NC(=C(S1)C1=CC(NCC2=CC=CC=C2)=NC=C1)C1=CC(C)=CC=C1	1	1	0	10	35	7	21	0	0	11	0	0	15	0	4	22	0	0	3	5	0	15	0	0	0	14	0	0	0	0	0	0	9	0	38	0	2	0	0	18	40	0	6	9	11	0
0	TPKI-109	4-pyridinyl_ortho-aryl_azoles	CC1=CC=CC(=C1)C1=C(SC(=N1)C1=CC=C(C=C1)S(C)(=O)=O)C1=CC=NC=C1	1	1	0	8	0	0	29	0	0	0	0	0	0	0	0	20	0	5	1	7	0	13	0	15	24	23	0	12	0	0	0	0	0	0	15	0	40	27	0	25	5	0	15	9	0	0
0	TPKI-110	4-pyridinyl_ortho-aryl_azoles	CC1=CC=CC(=C1)C1=C(SC(=N1)C1=CC=C(C=C1)S(C)(=O)=O)C1=CC(NCCC2=CC=CC=C2)=NC=C1	6	9	10	12	90.7	21	0	0	8	0	3	0	0	12	14	6	12	0	0	17	7	11	0	0	0	14	0	0	9	16	27	6	1	0	95.8	0	3	0	0	24	31	0	0	16	0	0
0	TPKI-111	2-amino-5-anilino-thiazolopyrimidine	CC(=O)NC1=NC2=CN=C(NC3=C(C)C=CC(NC(=O)C4=CC=CC(CCC#N)=C4)=C3)N=C2S1	7	10	11	6	94.8	29	29	0	0	0	0	15	4	0	17	33	0	0	8	7	0	7	0	16	12	18	7	0	10	0	0	0	16	7	97.7	0	0	11	32	14	25	0	30	0	20	0
0	TPKI-112	2-amino-5-anilino-thiazolopyrimidine	CC(=O)NC1=NC2=CN=C(NC3=C(C)C=CC(NC(=O)C4=CC=CC(CC(C)(C)C#N)=C4)=C3)N=C2S1	13	15	17	23	99.7	50	61	0	0	11	0	0	3	0	12	5	0	42	3	7	0	7	7	0	11	3	0	20	0	32	0	2	0	9	99.9	0	23	14	51	30	4	0	8	0	0	0
0	TPKI-113	2-amino-5-anilino-thiazolopyrimidine	CC(=O)NC1=NC2=CN=C(NC3=C(C)C=CC(NC(=O)C4=CC=CC(=C4Cl)C4(CC4)C#N)=C3)N=C2S1	12	15	15	23	99	59	70	0	0	0	0	0	0	0	7	13	0	0	7	21	0	2	0	0	0	26	0	0	0	45	0	0	2	1	99.4	30	10	0	0	0	35	0	30	0	13	0
0	TPKI-114	2-amino-5-anilino-thiazolopyrimidine	CN(C1=CC(NC(=O)C2=CC=CC(OC(C)(C)C#N)=C2Cl)=C(F)C=C1)C1=CC=C2N=C(NC(=O)C3CC3)SC2=N1	25	29	34	2	99	92.6	89	0	0	0	0	0	0	0	2	4	0	46	0	0	0	0	0	6	22	4	0	6	0	96.3	0	0	0	0	94	0	4	0	22	34	0	0	0	2	1	0
0	TPKI-16	Type 3 Mek	Cn1c2ncn(OC[C@H](O)CO)c(=O)c2c(Nc3ccc(I)cc3F)c(F)c1=O	2	3	3	10	54	41	3	14	0	29	28	1	21	0	15	0	0	0	0	13	0	0	0	0	0	9	30	10	30	9	0	0	0	0	0	2	0	15	0	0	0	0	8	0	4	12
0	TPKI-24	2-anilino-pyrimidyl-diazepanone	COc1cc(ccc1Nc2ncc3N(C)C(=O)C(F)(F)CN(C4CCCC4)c3n2)C(=O)NC5CCN(C)CC5	6	9	13	14	48	28	29	6	11	28	30	0	23	0	16	0	26	59	22	7	0	0	0	0	0	6	26	9	27	3	3	0	0	4	0	0	0	16	0	0	4	0	29	0	31	24
0	TPKI-25	2-anilino-pyrimidyl-diazepanone	CC[C@@]1(F)CN(C2CCCC2)c3nc(Nc4ccc(cc4OC)C(=O)NC5CCN(C)CC5)ncc3N(C)C1=O	1	5	5	0	42	0	1	0	0	17	20	2	12	32	19	0	14	13	1	11	0	35	0	0	0	9	0	0	0	4	0	0	0	0	0	0	0	0	0	0	0	0	0	0	0	0
0	TPKI-26	2-anilino-pyrimidyl-diazepanone	CC[C@]1(F)CN(C2CCCC2)c3nc(Nc4ccc(cc4OC)C(=O)NC5CCN(C)CC5)ncc3N(C)C1=O	3	3	6	6	58	30	29	6	0	0	0	0	39	6	21	0	11	53	35	0	0	1	30	0	0	11	15	2	21	19	17	17	0	9	8	0	2	9	0	0	17	0	26	0	6	16
0	TPKI-27	2-anilino-pyrimidyl-diazepanone	COc1cc(ccc1Nc2ncc3N(C)C(=O)[C@@H](CC=C)CN(C4CCCC4)c3n2)C(=O)NC5CCN(C)CC5	6	8	9	0	39	4	18	0	2	15	21	3	0	9	1	0	7	26	16	0	0	0	7	0	0	17	8	3	2	14	18	5	2	0	1	0	0	0	8	0	0	0	16	0	0	0
0	TPKI-28	2-anilino-pyrimidyl-diazepanone	COc1cc(cc(F)c1Nc2ncc3N(C)C(=O)C(F)(F)CN(C4CCCC4)c3n2)C(=O)NC5CCN(C)CC5	3	3	5	0	34	0	16	0	5	65	18	7	3	13	0	4	18	30	17	0	35	0	0	12	0	20	30	12	23	12	9	11	4	0	3	6	0	0	6	0	0	0	8	0	0	0
0	TPKI-29	2-anilino-pyrimidyl-diazepanone	CN1CCC(CC1)NC(=O)c2ccc(Nc3ncc4N(C)C(=O)C(F)(F)CN(C5CCCC5)c4n3)cc2	18	25	36	25	43	2	27	85	6	14	9	30	19	0	14	0	10	30	30	29	32	54	100	20	95.6	53	57	31	71	100	0	18	85	18	16	9	1	8	5	0	38	0	33	1	21	16
0	TPKI-30	2-anilino-pyrimidyl-diazepanone	COc1cc(Nc2ncc3N(C)C(=O)C(F)(F)CN(C4CCCC4)c3n2)ccc1C(=O)NC5CCN(C)CC5	12	15	16	13	38	0	21	14	0	33	0	0	100	0	15	0	0	27	28	2	47	18	0	30	81	39	35	0	42	8	0	18	92.2	100	20	23	9	8	0	0	18	0	21	0	0	0
0	TPKI-31	2-anilino-pyrimidyl-diazepanone	CN1CCC(CC1)NC(=O)c2ccc(Nc3ncc4N(C)C(=O)C(F)(F)CN(C5CCCC5)c4n3)cc2C	13	20	32	47	44	30	21	57	0	0	3	6	0	7	0	0	0	27	45	13	0	70	0	0	97.3	73	54	2	91	8	7	16	67	0	13	0	0	0	18	0	31	0	16	23	0	0
0	TPKI-32	4-amino-3-carboxamide cinnoline	NC(=O)c1nnc2ccccc2c1N	2	7	10	35	25	6	65	0	0	22	24	0	81	1	7	0	0	24	25	6	34	0	20	40	0	32	40	19	51	0	7	10	36	90.1	23	9	22	0	43	12	14	0	13	7	0	0
0	TPKI-33	4-amino-3-carboxamide cinnoline	Cn1cc(cn1)-c1cccc2c(N)c(nnc12)C(N)=O	3	5	12	36	24	0	9	63	28	27	29	3	15	11	0	0	15	10	47	49	19	0	1	33	6	27	53	22	70	6	16	21	72	15	30	8	11	18	86	32	33	0	29	7	7	2
0	TPKI-34	4-amino-3-carboxamide cinnoline	Cc1cc2cn[nH]c2cc1-c1cccc2c(N)c(nnc12)C(N)=O	18	37	61	60	64	16	29	96.2	25	30	1	74	0	0	0	0	0	67	87	74	32	0	13	95.6	90	97.3	79	15	75	91.5	25	88	96.5	83	33	20	54	48	99.8	0	47	19	29	11	0	5
0	TPKI-35	6-phenoxy-imidazopyridazine	CC1=CC(=NN1C1=CC=CC=C1)C(=O)NC1=CC=C(OC2=NN3C=C(NC(=O)C4CC4)N=C3C=C2)C=C1	15	23	27	18	100	99.1	81	0	0	2	15	0	8	0	18	0	0	2	0	18	0	0	0	0	0	66	65	79	18	55	3	0	0	62	10	75	12	32	0	0	10	0	15	0	0	0
0	TPKI-36	6-phenoxy-imidazopyridazine	FC1=CC(NC(=O)C2=CC=CN(C3=CC=CC=C3)C2=O)=CC=C1OC1=NN2C=C(NC(=O)C3CC3)N=C2C=C1	21	25	36	0	99.9	88	62	19	0	28	31	1	16	0	18	13	30	0	0	3	0	0	3	0	0	4	42	90.4	25	90.3	12	0	0	46	41	72	3	5	0	0	5	0	14	0	1	0
0	TPKI-37	6-phenoxy-imidazopyridazine	CC1=CC=C(C(=O)NC2=CC=C(OC3=CN4C=C(NC(=O)C5CC5)N=C4C=C3)C(F)=C2)C(=O)N1C1=CC=CC=C1	40	52	62	0	100	98.3	83	0	0	0	16	0	13	27	0	0	7	8	5	0	0	0	0	0	0	82	48	84	4	99.3	0	0	0	73	57	88	0	0	0	0	0	0	0	0	0	0
0	TPKI-38	6-phenoxy-imidazopyridazine	O=C(NC1=CC=CC=C1)NC1=CC=C(OC2=NN3C=CN=C3C=C2)C=C1	6	9	9	0	66	18	27	5	0	24	9	0	15	1	13	0	10	0	25	0	0	0	8	0	0	68	16	0	0	13	18	6	0	8	0	0	0	0	0	0	0	0	0	0	0	0
0	TPKI-39	6-phenoxy-imidazopyridazine	O=C(NC1=CC=CC=C1)NC1=CC=CC(OC2=NN3C=CN=C3C=C2)=C1	8	10	11	0	89	6	31	0	0	0	6	0	5	18	32	0	20	17	11	0	0	0	0	0	0	8	26	7	0	0	0	0	0	0	24	0	0	0	0	0	0	0	3	0	0	0
0	TPKI-40	6-phenoxy-imidazopyridazine	FC(F)(F)C1=CC=CC(NC(=O)NC2=CC=CC(OC3=NN4C=CN=C4C=C3)=C2)=C1	17	20	24	0	98.2	15	71	0	0	22	9	0	0	0	0	0	7	14	0	0	0	8	0	4	0	0	41	35	11	9	0	0	0	0	88	0	5	13	0	7	5	0	12	0	0	0
0	TPKI-41	6-phenoxy-imidazopyridazine	O=C(NC1=CC=CC=C1)C1=CC=CC(OC2=NN3C=CN=C3C=C2)=C1	10	12	16	1	12	0	3	6	5	0	5	2	19	0	11	0	0	0	5	7	2	0	0	3	0	4	28	0	5	9	0	14	22	17	3	0	7	0	0	0	0	0	0	0	0	12
0	TPKI-42	6-phenoxy-imidazopyridazine	FC(F)(F)C1=CC(NC(=O)C2=CC=CC(OC3=NN4C=CN=C4C=C3)=C2)=CC=C1	14	17	22	0	98.5	17	76	0	0	24	8	0	14	0	0	17	1	0	8	84	0	0	5	21	5	9	6	31	15	6	0	12	21	8	76	4	31	100	0	12	1	0	3	0	0	0
0	TPKI-43	4-anilino or phenoxy pyrrolopyrimidine	CN1C=CC2=C1C(OC1=CC=C(NC(=O)NC3=CC=CC(=C3)C(F)(F)F)C(F)=C1)=NC=N2	27	38	45	15	88	51	29	0	0	32	36	7	18	0	23	0	0	20	0	0	0	5	5	0	5	88	65	87	18	22	0	0	0	1	62	0	0	2	30	0	0	0	12	11	6	8
0	TPKI-44	6-phenoxy-imidazopyridazine	CC(=O)NC1=CN2N=C(OC3=CC=CC(NC(=O)C4=CC=CC(=C4)C(F)(F)F)=C3)C=CC2=N1	43	47	47	0	100	99.9	99.3	0	0	0	31	0	0	9	20	0	16	9	0	8	0	12	0	0	0	60	74	51	18	98.2	10	0	0	25	99.7	92.1	0	0	4	0	19	0	24	0	0	15
0	TPKI-45	6-phenoxy-imidazopyridazine	FC(F)(F)C1=CC=CC=C1C(=O)NC1=CC(OC2=NN3C=C(NC(=O)C4CC4)N=C3C=C2)=CC=C1	16	22	30	45	100	90	79	0	0	16	34	0	3	12	0	0	0	22	0	3	1	0	0	0	89	92.8	77	75	79	25	0	0	0	0	65	0	6	0	16	0	7	0	3	0	100	100
0	TPKI-46	6-phenoxy-imidazopyridazine	COC1=CC(=CC=C1)C(=O)NC1=CC=CC(OC2=NN3C=C(NC(=O)C4CC4)N=C3C=C2)=C1	33	41	43	27	100	99.7	96.3	0	0	1	18	8	10	39	19	0	3	0	23	0	0	0	7	0	55	81	74	65	18	95.3	10	13	0	77	96.5	21	4	0	9	0	16	0	17	21	11	18
0	TPKI-47	phenoxy-thiazolo-pyridines	O=C(NC1=NC2=C(S1)N=C(OC1=CC(NC(=O)C3=CC=CC(=C3)C3(CC3)C#N)=CC=C1)C=C2)C1CC1	41	47	51	3	100	98.7	95	0	0	3	1	0	40	2	27	6	0	15	17	27	0	0	0	3	0	57	48	62	1	95.2	0	0	0	0	99.9	18	13	0	6	0	0	0	2	0	29	26
0	TPKI-48	pyrazolobenzothiazines	CCC1=CC=C(C=C1)C1=CC2=C(C=C1)N(C)S(=O)(=O)C1=CNN=C21	2	3	3	15	26	0	0	0	0	13	22	0	9	0	3	0	0	0	0	1	0	13	6	0	0	0	11	51	12	9	0	0	0	0	0	0	0	4	0	0	0	0	0	0	0	0
0	TPKI-49	pyrazolobenzothiazines	CN1C2=C(C=C(C=C2)C2=CC=C(C=C2)C(N)=O)C2=C(C=NN2)S1(=O)=O	1	3	5	39	36	9	0	0	3	8	16	16	0	3	3	0	0	30	0	0	0	0	0	0	0	21	0	5	9	6	0	0	0	0	0	0	0	6	0	0	27	32	10	0	11	7
0	TPKI-50	pyrazolobenzothiazines	CN1C2=C(C=C(C=C2)C2=CC=C(C=C2)C(=O)NCCO)C2=C(C=NN2)S1(=O)=O	1	4	6	54	33	15	7	22	0	0	2	0	0	3	11	0	12	44	16	0	0	0	34	3	0	37	9	17	10	26	19	16	0	13	19	0	0	15	6	0	49	23	45	0	67	66
0	TPKI-51	pyrazolobenzothiazines	CCC1=CC=C(C=C1)C1=CC2=C(C=C1)N(C)S(=O)(=O)C1=C2N(C)N=C1	0	0	1	0	7	0	0	0	14	5	0	17	0	0	0	0	0	0	0	0	0	0	0	0	14	0	35	8	0	0	0	0	0	0	0	1	19	0	3	15	2	0	0	5	0	4
0	TPKI-52	pyrazolobenzothiazines	CCC1=CC=C(C=C1)C1=CC=C2N(C)S(=O)(=O)C3=CN(C)N=C3C2=C1	1	1	1	19	31	0	0	0	0	21	1	0	0	0	0	3	0	10	0	9	0	13	0	0	0	6	0	8	0	0	0	0	0	0	32	0	0	11	13	0	2	0	5	16	9	19
0	TPKI-53	pyrazolobenzothiazines	CN1N=CC2=C1C1=C(C=CC(CNC3=CC=C(F)C=C3)=C1)N(C)S2(=O)=O	1	1	1	0	21	0	0	0	0	1	0	0	2	5	0	0	0	8	0	13	0	6	0	3	0	21	0	11	0	0	0	0	0	0	36	0	0	0	0	0	63	0	50	0	0	1
0	TPKI-54	pyrazolobenzothiazines	CN1N=CC2=C1C1=C(C=CC(NCC3=CC=C(F)C=C3)=C1)N(C)S2(=O)=O	1	1	1	0	21	9	0	0	0	0	0	7	10	0	4	7	0	13	0	0	0	0	0	0	0	14	0	0	0	0	0	1	0	0	17	0	0	0	0	0	0	0	0	0	0	0
0	TPKI-55	2-amino-imidazopyridine	CC(C)(C)C1=CC=C(C=C1)C(=O)NC1=CN2C=C(Cl)C=CC2=N1	6	7	12	0	35	0	0	0	0	0	9	0	5	0	5	0	0	3	0	16	0	0	86	0	0	64	17	0	0	0	0	3	0	0	9	0	0	0	0	0	0	0	0	0	3	0
0	TPKI-56	2-amino-imidazopyridine	CNCC1=CN2C=C(NC(=O)C3=CC=C(C=C3)C(C)(C)C)N=C2C=C1	4	9	11	0	13	12	1	2	0	0	0	7	0	13	5	8	17	16	0	13	40	0	21	0	8	22	25	15	15	0	17	14	19	0	18	2	9	0	32	26	1	33	1	0	4	2
0	TPKI-57	2-amino-imidazopyridine	CC(C)(C)C1=CC=C(C=C1)C(=O)NC1=CN2C=C(C=CC2=N1)C1=CC=CC=C1	3	3	6	0	74	55	21	5	0	0	0	5	25	0	0	0	0	0	0	0	0	13	40	0	48	51	0	0	0	0	8	0	0	13	0	0	0	0	0	0	0	6	0	0	0	0
0	TPKI-58	2-amino-imidazopyridine	CC(C)(C)C1=CC=C(C=C1)C(=O)NC1=CN2C=C(C=CC2=N1)C1=CC=CN=C1	5	6	9	25	50	37	20	21	13	0	0	0	19	0	0	0	4	0	43	0	11	14	94.9	0	0	34	19	25	8	8	34	0	1	25	0	0	6	25	0	8	4	24	38	12	6	7
0	TPKI-59	2-amino-imidazopyridine	CC(C)(C)C1=CC=C(C=C1)C(=O)NC1=CN2C=C(C=CC2=N1)N1C=CN=C1	7	10	14	12	44	21	22	0	7	10	8	0	2	19	6	0	0	0	14	0	82	2	80	6	0	24	0	0	0	0	3	0	8	0	19	15	31	0	0	7	32	0	6	7	18	0
0	TPKI-60	4-anilino or phenoxy pyrrolopyrimidine	ClC1=C(OC2=CC=C(C=C2)C#N)C=CC(NC2=NC=NC3=C2NC=C3)=C1	1	1	3	14	51	6	12	1	15	27	25	6	13	8	0	0	0	0	17	15	28	10	18	0	11	16	11	22	1	28	18	8	25	13	0	11	3	0	0	12	24	0	33	17	21	22
0	TPKI-61	4-anilino or phenoxy pyrrolopyrimidine	FC1=CC(COC2=CC=C(NC3=NC=NC4=C3NC=C4)C=C2Cl)=CC=C1	2	3	3	4	19	21	10	19	12	0	3	16	1	17	0	0	0	0	4	0	40	11	11	0	16	24	8	16	9	1	21	16	15	6	0	11	2	0	0	1	29	7	0	10	27	28
0	TPKI-62	4-anilino or phenoxy pyrrolopyrimidine	ClC1=C(OCC2=NC=CC=C2)C=CC(NC2=NC=NC3=C2NC=C3)=C1	2	2	4	7	48	0	0	10	28	0	0	5	9	3	10	19	5	0	20	0	20	0	5	0	35	13	0	19	0	0	25	8	17	20	0	4	0	1	0	0	35	4	33	27	0	0
0	TPKI-63	4-anilino or phenoxy pyrrolopyrimidine	CC1=CC=C(OC2=C(C)C=C(NC3=NC=NC4=C3NC=C4)C=C2)C=N1	4	4	5	0	19	0	0	2	27	0	0	0	16	0	17	0	0	7	0	14	5	0	0	0	20	0	10	25	4	0	34	1	13	20	0	0	10	19	19	0	16	0	34	0	0	0
0	TPKI-64	4-anilino or phenoxy pyrrolopyrimidine	CN1C=CC2=C1C(NC1=CC(Cl)=C(OC3=CC=CC(Cl)=C3)C=C1)=NC=N2	6	7	7	27	45	15	16	0	28	0	17	0	1	0	22	7	0	0	18	20	0	22	0	11	0	33	0	0	0	14	22	0	29	13	0	17	13	0	0	12	22	0	11	5	9	0
0	TPKI-65	4-anilino or phenoxy pyrrolopyrimidine	OCCOCCN1C=CC2=C1C(NC1=CC(Cl)=C(OC3=CC=CC(Cl)=C3)C=C1)=NC=N2	3	4	5	0	24	0	0	0	0	8	0	0	2	0	0	0	0	0	0	0	0	0	0	0	0	0	0	0	0	3	1	0	0	13	0	0	0	33	0	0	0	0	0	0	0	0
0	TPKI-66	4-anilino or phenoxy pyrrolopyrimidine	OCCC(=O)NCCN1C=CC2=C1C(NC1=CC(Cl)=C(OC3=CC=CC(=C3)C(F)(F)F)C=C1)=NC=N2	4	4	5	0	24	12	0	0	0	0	0	0	3	0	0	0	0	0	0	0	0	0	0	0	0	0	0	0	0	0	0	0	0	0	0	13	0	0	0	0	0	0	7	0	0	0
0	TPKI-67	4-anilino or phenoxy pyrrolopyrimidine	CN1C=CC2=C1C(OC1=CC=C(NC(=O)NC3=CC=CC(C)=C3)C=C1)=NC=N2	16	19	21	0	33	23	0	4	0	2	0	0	0	0	0	0	0	0	9	0	0	0	0	0	0	94.9	85	44	10	0	0	0	0	0	0	0	0	0	91.6	0	0	14	6	0	0	0
0	TPKI-68	4-anilino or phenoxy pyrrolopyrimidine	CN1C=CC2=C1C(OC1=CC=C(NC(=O)NC3=CC=CC(=C3)C(F)(F)F)C(Cl)=C1)=NC=N2	21	34	38	0	88	19	21	0	1	0	47	0	5	6	0	0	0	0	15	0	0	3	5	0	0	51	29	75	0	6	15	0	0	15	46	5	0	0	0	0	4	16	16	1	0	0
0	TPKI-69	4-anilino or phenoxy pyrrolopyrimidine	CN1C=CC2=C1C(OC1=CC=C(NC(=O)NC3=CC=CC=C3)C=C1)=NC=N2	9	11	11	0	26	0	0	0	0	0	0	0	12	5	13	0	0	0	0	2	0	4	16	0	15	93.7	84	0	0	2	0	0	0	42	0	6	0	17	0	0	0	4	5	22	0	0
0	TPKI-70	4-anilino or phenoxy pyrrolopyrimidine	CN1C=CC2=C1C(OC1=CC(=CC=C1)C(=O)NC1=CC=CC=C1)=NC=N2	2	2	2	22	0	0	0	100	1	0	1	0	6	17	0	0	10	0	0	0	28	14	0	0	21	0	26	3	14	1	5	13	14	0	0	15	0	0	0	8	29	12	0	17	1	0
0	TPKI-71	4-anilino or phenoxy pyrrolopyrimidine	CCCNC(=O)NC1=CC=C(OC2=NC=NC3=C2N(C)C=C3)C=C1	0	1	1	13	30	6	4	0	13	2	0	0	0	0	7	8	0	0	0	12	0	0	0	1	7	60	0	0	0	14	10	0	16	0	0	0	0	8	0	0	13	0	0	19	0	1
0	TPKI-72	4-anilino or phenoxy pyrrolopyrimidine	CN1C=CC2=C1C(OC1=CC=C(NC3=NC4=C(N3)C=CC=C4)C=C1)=NC=N2	4	4	5	21	45	2	4	0	0	10	0	0	0	0	0	16	0	0	7	0	0	14	0	0	0	95.2	3	0	0	0	0	0	0	0	0	0	0	2	0	0	0	0	0	0	7	5
0	TPKI-73	4-anilino or phenoxy pyrrolopyrimidine	CN1C=CC2=C1C(OC1=CC=C(NC(=O)NC3=CC=CN=C3)C(Cl)=C1)=NC=N2	5	6	7	19	23	0	11	0	0	0	0	0	0	0	0	8	0	0	4	9	0	3	5	0	18	47	0	7	0	8	0	0	7	0	0	0	6	0	0	5	21	0	0	27	0	18
0	TPKI-74	4-anilino or phenoxy pyrrolopyrimidine	CN1C=CC2=C1C(OC1=CC=C(NC(=O)NC3=CC=NC=C3)C(Cl)=C1)=NC=N2	1	1	2	0	31	3	0	0	23	0	0	4	0	0	9	14	0	0	0	5	0	14	0	0	0	3	0	0	0	0	1	0	20	0	0	0	0	0	0	11	0	0	0	0	0	0
0	TPKI-75	4-anilino or phenoxy pyrrolopyrimidine	CN1C=CC2=C1C(OC1=CC=C(NC(=O)NC3=CN(N=C3)C(C)(C)C)C(Cl)=C1)=NC=N2	17	22	31	3	87	39	11	0	2	0	0	17	0	0	0	8	13	0	19	20	0	19	2	9	23	44	52	76	19	32	17	6	9	0	77	0	0	12	0	0	9	9	0	0	0	17
0	TPKI-76	4-anilino or phenoxy pyrrolopyrimidine	CN1C=CC2=C1C(OC1=CC=C(NC(=O)NC3=NOC(=C3)C(C)(C)C)C(Cl)=C1)=NC=N2	37	47	55	18	94.8	51	46	0	15	12	12	0	0	19	18	0	0	38	0	21	10	4	11	0	6	88	15	97.2	0	87	7	16	5	33	76	10	8	0	0	5	17	0	14	12	100	100
0	TPKI-77	4-anilino or phenoxy pyrrolopyrimidine	CN1C=CC2=C1C(OC1=CC=C(NC(=O)NC3=CC(=CN=C3)C(F)(F)F)C(Cl)=C1)=NC=N2	22	27	31	0	92.7	35	27	0	0	0	0	0	2	0	6	13	0	0	0	0	0	0	0	0	0	25	0	59	0	9	0	0	0	0	52	0	0	0	0	0	0	0	0	0	0	0
0	TPKI-78	4-anilino or phenoxy pyrrolopyrimidine	CN1C=CC2=C1C(OC1=CC=C(NC(=O)NC3=CC(=NC=C3)C(F)(F)F)C(Cl)=C1)=NC=N2	16	17	19	18	68	10	5	11	0	4	13	63	0	4	7	0	0	0	0	0	0	2	0	0	18	34	0	12	0	0	0	6	0	17	45	0	0	0	0	5	0	0	0	31	0	0
0	TPKI-79	benzofuran oxadiazole and analogues	COC1=CC=C(C=C1)C1=COC2=CC=C(C=C12)C1=NN=C(C)O1	3	3	3	0	32	7	0	0	12	5	0	27	9	0	8	0	2	0	0	3	0	0	0	10	0	18	0	0	0	3	18	0	0	0	0	0	0	100	0	0	0	0	13	5	0	0
0	TPKI-80	benzofuran oxadiazole and analogues	CC(O)C1=CC=C(C=C1)C1=COC2=C1C=C(C=C2)C1=NN=C(C)O1	1	1	3	23	64	36	8	15	14	9	27	8	0	0	17	0	4	0	0	14	3	35	0	11	13	27	23	3	18	2	2	23	2	44	1	0	10	13	0	9	12	0	0	0	3	0
0	TPKI-81	benzofuran oxadiazole and analogues	CCS(=O)C1=CC=C(C=C1)C1=COC2=C1C=C(C=C2)C1=NN=C(C)O1	2	2	2	0	27	0	0	5	0	0	0	6	5	0	0	0	0	5	26	1	30	0	0	0	16	1	0	0	0	3	0	6	15	18	0	0	0	11	18	0	20	5	23	2	0	3
0	TPKI-82	benzofuran oxadiazole and analogues	CC1=NN=C(O1)C1=CC2=C(C=C1)N=CN2C1=CC=C(C=C1)S(C)=O	3	3	4	0	22	0	6	0	15	0	0	9	5	0	0	0	0	6	0	2	0	21	0	0	21	10	5	4	0	0	19	0	0	12	0	19	0	0	0	0	11	13	0	2	0	0
0	TPKI-83	benzofuran oxadiazole and analogues	CC1=NN=C(O1)C1=CN2C(C=C1)=NC=C2C1=CC=C(C=C1)S(C)=O	0	0	1	41	44	6	7	0	0	0	0	0	0	18	3	15	2	40	1	0	0	0	0	9	18	21	0	11	0	0	9	16	18	0	62	14	14	0	24	16	0	6	0	26	0	0
0	TPKI-84	benzofuran oxadiazole and analogues	CC1=NN=C(O1)C1=CC=C2OC=C(C2=N1)C1=CC=C(C=C1)S(C)=O	0	0	0	0	43	30	16	0	0	0	0	0	2	0	0	17	0	0	0	0	0	10	0	0	0	0	0	0	0	0	0	0	0	0	0	0	0	0	0	0	3	0	17	3	0	0
0	TPKI-85	benzofuran oxadiazole and analogues	CC1=NN=C(N1)C1=CC=C2OC=C(C2=C1)C1=CC=C(C=C1)S(C)=O	4	8	10	25	17	0	7	0	0	23	14	0	0	0	5	4	0	0	99.1	6	28	6	0	3	25	49	0	24	0	0	11	37	26	0	2	0	38	0	0	26	9	1	15	23	4	12
0	TPKI-86	benzofuran oxadiazole and analogues	CC1=CC=C(N=N1)C1=CC=C2OC=C(C2=C1)C1=CC=C(C=C1)S(C)=O	0	0	0	15	35	29	0	0	7	0	0	20	0	0	2	12	9	0	0	1	0	16	0	0	0	3	0	0	0	0	15	0	0	0	0	0	0	0	0	5	0	14	15	7	0	0
0	TPKI-87	benzofuran oxadiazole and analogues	CS(=O)C1=CC=C(C=C1)C1=COC2=CC=C(C=C12)C1=NNC(=O)O1	13	19	21	21	35	3	0	0	14	8	19	0	0	12	0	0	26	13	100	5	36	10	0	23	13	26	0	3	17	4	10	32	9	0	12	0	0	2	20	14	0	14	0	12	5	16
0	TPKI-88	benzofuran oxadiazole and analogues	FC1=CC(CSC2=NN=C(O2)C2=CC3=C(OCC3)C=C2)=CC=C1	1	1	4	25	20	7	22	0	17	0	0	0	0	6	12	14	0	79	13	17	35	11	11	22	9	20	0	0	0	0	1	5	0	0	7	2	0	0	33	25	6	0	0	2	16	24
0	TPKI-89	benzofuran oxadiazole and analogues	COC1=CC=C(CSC2=NN=C(O2)C2=CC3=C(OCC3)C=C2)C=C1	0	2	3	8	28	0	8	0	0	0	0	0	0	0	0	0	0	0	0	0	0	33	0	0	0	0	0	0	0	0	0	0	0	0	0	0	0	0	0	0	0	0	0	9	0	0
0	TPKI-90	benzofuran oxadiazole and analogues	FC1=CC(COC2=NN=C(O2)C2=CC3=C(OCC3)C=C2)=CC=C1	1	1	1	26	25	0	22	0	0	0	100	0	0	0	0	20	11	7	6	0	0	5	0	23	15	37	0	0	0	0	0	6	18	0	0	0	0	6	17	20	18	0	0	12	0	6
0	TPKI-91	benzofuran oxadiazole and analogues	COC1=CC=C(CSC2=NN=C(O2)C2=CC3=C(C=C2)N=CS3)C=C1C(F)(F)F	2	4	4	9	13	8	2	0	9	0	0	2	0	0	8	4	0	0	0	13	0	10	0	4	0	13	0	0	0	0	17	0	0	0	0	0	0	0	0	0	1	0	23	2	0	0
0	TPKI-92	benzofuran oxadiazole and analogues	COC1=C(C=C(CSC2=NN=C(O2)C2=CN3C=CN=C3C=C2)C=C1)C(F)(F)F	6	6	6	16	28	13	21	0	23	7	15	21	6	6	13	4	44	29	3	9	0	9	0	44	0	22	15	20	18	1	0	21	3	0	9	0	14	3	15	0	5	8	0	22	2	32
0	TPKI-93	benzofuran oxadiazole and analogues	COC1=CC=C(C=C1)C1=COC2=C1C=C(C=C2)C1=NN=C(O1)SCC1=CC=C(OC)C(=C1)C(F)(F)F	0	0	0	2	13	0	24	28	7	0	0	26	21	10	4	0	0	0	31	0	38	0	17	0	21	11	7	11	0	7	20	13	14	29	0	0	0	13	0	0	0	8	14	3	0	1
0	TPKI-94	benzofuran oxadiazole and analogues	COC1=CC=C(C=C1)C1=COC2=C1C=C(C=C2)C1=NN=C(O1)SCC1=CC=CC(=C1)C#N	1	2	2	0	23	0	0	6	6	0	0	0	21	0	0	2	0	0	7	0	19	16	9	6	22	12	0	21	0	0	14	17	18	28	0	10	0	10	0	0	26	6	23	8	0	0
0	TPKI-95	isoquinolone	COC(=O)C1=C(C2=CC=CC=C2)C2=CC(Br)=CC=C2C(=O)N1CC1=CC=C(NC(=O)CCC(O)=O)C=C1	4	4	4	13	38	0	18	0	0	0	0	0	0	0	12	11	0	52	21	22	0	0	2	0	0	9	0	0	0	4	0	6	7	2	42	0	0	0	38	20	12	38	12	9	0	0
0	TPKI-96	isoquinolone	COC(=O)C1=C(C2=CC=CC=C2)C2=CC(C)=CC=C2C(=O)N1CC1=CC=CC=C1	1	2	5	1	53	0	6	0	0	7	0	0	0	0	0	3	0	0	0	0	0	4	0	0	0	9	0	0	0	0	0	0	0	19	79	0	0	0	0	0	21	0	19	12	0	0
0	TPKI-97	isoquinolone	COC(=O)C1=C(C2=CC=CC=C2)C2=CC(OC)=CC=C2C(=O)N1CC1=CC=CC=C1	2	6	6	22	66	0	12	0	0	0	0	0	0	0	1	12	0	28	21	0	0	27	0	37	25	22	0	0	0	0	0	0	0	9	89	0	9	6	54	21	19	0	20	20	15	0
0	TPKI-98	isoquinolone	COC(=O)C1=C(C2=CC=CC=C2)C2=CC(=CC=C2C(=O)N1CC1=CC=CC=C1)C(O)=O	3	5	6	3	77	7	7	0	9	36	0	20	0	0	0	0	1	0	0	7	0	5	0	0	0	11	0	0	0	0	0	3	0	17	90	0	0	0	0	0	1	0	1	6	0	0
0	TPKI-99	isoquinolone	COC(=O)C1=C(C2=CC=CC=C2)C2=CC(Cl)=CC=C2C(=O)N1CC1=CC=C(C=C1)S(C)(=O)=O	5	6	7	18	40	0	18	0	0	0	0	0	17	0	9	3	0	8	7	0	0	19	6	6	4	12	0	0	0	0	0	5	0	17	65	7	0	0	25	0	2	0	0	9	0	0
GW574783	UNC10112604A	4-anilino-quinazoline and analogues	Cl.CS(=O)(=O)CCNCc1ccc(o1)-c1ccc2ncnc(Nc3ccc(OCc4ccccc4)c(Cl)c3)c2c1	4	5	7	13	0	0	0	2	0	4	22	0	23	20	46	21	27	18	9	24	0	18	0	0	0	4	2	42	19	49	0	0	0	19	9	0	1	0	0	26	14	0	4	27	0	0
GW779439	UNC10112721A	4-pyrimidinyl-azoles	CN1CCN(CC1)c1ccc(Nc2nccc(n2)-c2cnn3ncccc23)cc1C(F)(F)F	93	113	145	76	53	50	19	45	17	4	0	0	0	100	0	0	0	82	33	51	4	98.4	0	17	76	35	44	73	78	12	0	80	40	0	77	1	0	2	0	59	22	74	49	39	35	29
GW824645	UNC10112764A	3-aryl-5-anilino pyrazole	Cl.NS(=O)(=O)c1cccc(Nc2cc(n[nH]2)-c2ccc(F)cc2)c1	2	4	6	9	5	24	0	0	0	0	0	0	0	0	0	0	0	0	0	18	0	0	0	0	4	29	0	0	0	23	7	0	45	0	33	0	0	0	0	36	0	0	0	0	0	0
GW683134	UNC10112774A	2-aminobenzimidazole	Cl.Fc1ccc(cc1NC(=O)Nc1ccc(Oc2ccc3[nH]c(NC(=O)c4ccco4)nc3c2)cc1)C(F)(F)F	41	54	63	5	96.1	76	97.9	0	0	4	0	0	0	0	0	12	0	27	0	16	1	12	0	0	0	92.6	50	96	15	54	0	0	0	1	69	0	0	0	0	30	0	29	0	0	0	0
SB-707548	UNC10112792A	4-amino-3-aryl-thienopyridine and analogues	Cl.Nc1ncnc2occ(-c3ccc(NC(=O)Nc4cc(ccc4F)C(F)(F)F)cc3)c12	59	71	89	0	99.1	50	81	1	0	81	2	0	10	28	0	0	0	75	5	22	77	21	32	0	53	96.7	53	97.7	10	44	0	0	1	82	71	3	20	0	21	17	22	36	23	0	0	0
SB-693162/GW549034	UNC10112830A	aminofurazan	CCn1c(nc2ccccc12)-c1nonc1N	0	3	5	29	53	27	0	0	1	0	0	0	4	0	0	1	0	0	7	0	51	3	16	2	27	37	0	25	6	21	0	34	40	0	15	0	46	4	29	0	17	8	20	0	5	0
GW781483	UNC10126563B	4-anilino-quinazoline and analogues	Fc1ccc(Nc2ncnc3cc(OCCCN4CCOCC4)c(NC(=O)C=C)cc23)cc1Cl	10	14	19	0	90.6	89	70	38	3	0	0	7	0	19	1	0	7	14	0	0	0	0	0	0	25	0	20	53	22	99.6	0	0	15	35	3	25	8	0	94	52	14	61	28	0	0	0
GSK1398467	UNC10224985A	Biphenylamide	Cc1ccc(NC(=O)c2ccc(Cl)cc2)cc1-c1ccc(cc1)C(=O)Nc1ccncc1	6	9	10	8	0	0	20	7	0	0	10	0	15	0	0	19	0	18	0	21	0	6	0	21	0	1	17	0	13	1	0	0	0	8	0	0	0	18	0	47	4	4	0	9	100	86
GW810445	UNC10224986A	Biphenylamide	Fc1ccc(cc1-c1ccc(cc1)C(=O)NCC1CC1)C(=O)NC1CC1	0	0	1	0	0	10	3	0	0	0	6	0	0	23	24	0	0	10	0	0	0	0	19	0	0	4	0	10	0	30	0	0	15	0	0	0	0	0	0	22	0	21	0	0	0	0
GSK2608899	UNC10224987A	7-alkyl-5-aryl-4-aminopyrrolopyrimidine	COc1cccc(CC(=O)N2CCc3cc(ccc23)-c2cn(C)c3ncnc(N)c23)c1	13	21	28	18	57	4	30	0	14	0	61	19	2	0	0	8	27	5	15	25	6	19	14	12	52	87	48	96.2	21	36	6	6	0	0	6	53	8	0	0	0	16	43	19	20	0	0
GSK336735	UNC10224988A	4-pyrimidinyl_ortho-aryl_azoles	NS(=O)(=O)CCc1cccc(Nc2nccc(n2)-c2c(nn3ccccc23)-c2cccc(NC(=O)c3c(F)cccc3F)c2)c1	59	75	87	0	95.3	16	78	0	7	0	37	0	9	42	0	16	0	24	20	33	83	84	2	0	93.5	81	72	90.5	27	99.7	0	0	0	94.6	89	96	8	20	94.6	77	53	0	29	0	0	0
GW457859	UNC10224989A	4-pyridinyl_ortho-aryl_azoles	Cl.Cc1ccn2nc(c(-c3ccncc3)c2c1)-c1ccc(F)cc1	8	14	17	0	0	0	0	9	0	0	32	0	17	59	0	0	0	1	5	0	5	5	0	0	10	0	8	3	17	26	0	0	3	8	49	0	0	0	22	87	16	30	1	0	0	0
GSK306886	UNC10224990A	4-anilino-quinazoline and analogues	Cl.Fc1cccc(c1)S(=O)(=O)c1ccc(Nc2ncnc3cc(Br)sc23)cc1Cl	5	5	5	16	0	0	0	18	0	0	0	7	11	22	0	3	0	14	0	0	3	10	8	0	30	0	0	0	0	10	0	0	0	15	0	0	0	0	0	0	2	38	10	0	0	0
GSK2008607	UNC10224991A	4-pyrimidinyl_ortho-aryl_azoles	CC(C)c1nc(c(s1)-c1ccnc(Nc2ccc(nc2)N2CCOCC2)n1)-c1cccc(NS(=O)(=O)c2c(F)cccc2F)c1F	114	143	150	0	99.8	99.3	99.4	43	90.5	0	86	11	100	100	0	0	0	28	97	98.8	29	0	0	3	93.6	91.8	53	97.5	24	99.7	53	98.5	0	99.2	99.9	88	49	75	95.3	98	81	67	94.3	42	0	0
GSK1398471	UNC10224992A	Biphenylamide	Cc1ccc(NC(=O)Nc2ccccc2)cc1-c1ccc(cc1)C(=O)Nc1ccncc1	5	6	6	8	0	0	16	0	0	0	0	0	19	14	1	4	0	21	15	11	0	13	10	4	15	0	0	11	20	33	0	0	0	18	32	15	9	2	0	0	15	13	20	0	0	0
GSK1669917	UNC10224993A	2-anilino-4-aminopyrimidine	Cl.Cc1cc(nc(Nc2ccc(cc2)S(=O)(=O)N2CCOCC2)n1)N1Cc2ccccc2C1	6	6	7	1	0	0	0	2	0	0	0	0	7	8	96.3	0	0	5	0	16	24	0	0	0	0	0	0	0	9	16	0	0	0	11	0	38	0	0	0	21	5	4	9	0	0	0
GSK2375584	UNC10224994A	3-Amino-6-aryl-indazole	CNc1nc(cc(n1)-c1ccc2c(N)n[nH]c2c1)N1C[C@H](OC[C@H]1C)C(=O)NC1CCCCC1	1	1	2	40	6	0	3	18	0	0	35	0	24	18	0	22	0	0	6	0	8	23	12	0	9	16	12	0	24	0	0	0	0	23	0	14	14	19	7	36	19	0	20	0	0	0
SKF-105942	UNC10224995A	4-pyridinyl_ortho-aryl_azoles	CS(=O)(=O)c1ccc(cc1)-c1nc2CCCn2c1-c1ccncc1	12	12	13	14	0	8	9	10	0	0	0	0	11	58	0	100	0	28	24	0	0	8	11	0	0	34	0	0	3	9	0	0	0	1	0	15	0	0	0	26	8	7	0	14	0	0
GW872411	UNC10224997A	2-aryl-4-anilino(pyridin-4-yl)-quinazoline and analogues	Cc1cccc(n1)-c1nc(Nc2ccnc(C)c2)c2ccccc2n1	2	4	7	0	52	13	0	0	73	2	13	0	0	0	0	0	2	0	0	0	0	9	0	0	3	14	0	0	0	0	3	0	0	0	0	0	0	13	0	0	0	0	0	0	0	0
GSK1379715	UNC10224998A	2-anilino-4-pyrrolidinopyrimidine	CCCc1ccc(cc1)S(=O)(=O)NC1CCN(C1)c1ccnc(Nc2ccc(F)cc2)n1	7	10	11	1	0	0	6	16	0	0	0	0	14	34	0	100	0	32	6	0	0	0	2	0	0	29	5	12	0	0	0	0	0	2	0	0	0	0	0	29	0	6	0	0	0	0
GW579362	UNC10224999A	2,4-dianilinopyrimidine	Cl.Cc1ccc(Nc2ccnc(Nc3ccc4CS(=O)(=O)Cc4c3)n2)cc1O	71	119	136	80	99.3	99.8	99.3	99.5	84	72	95.6	85	8	100	0	0	0	51	10	17	44	25	0	3	100	85	97.9	86	99.8	99.5	85	99.8	62	80	77	95	10	3	100	99.3	62	31	38	34	0	0
GSK2645446	UNC10225000A	4-amino-3-aryl-thienopyridine and analogues	Nc1ncnc2occ(-c3ccc4N(CCc4c3)C(=O)Cc3cc(F)ccc3F)c12	2	4	5	53	27	3	13	0	0	0	0	0	8	0	0	0	0	0	4	0	3	12	0	0	0	48	40	34	17	14	0	0	8	12	4	8	12	0	0	0	6	0	8	9	0	0
SB-213663	UNC10225001A	4-pyridinyl_ortho-aryl_azoles	CS(=O)(=O)c1ccccc1-c1nc(c([nH]1)-c1ccncc1)-c1ccc(F)cc1	9	11	16	0	53	0	0	0	4	0	0	0	0	12	0	0	25	17	0	0	0	0	0	0	10	0	0	40	0	25	8	0	0	0	51	0	13	0	23	23	29	66	33	0	0	0
SB-735464	UNC10225002A	3-acylamino-6-aryl-indazole	Fc1cccc(c1)-c1ccc2c(NC(=O)C3CC3)n[nH]c2c1	0	2	3	26	64	43	8	36	10	32	50	4	0	0	0	0	19	0	10	69	0	0	0	22	18	39	35	27	21	0	16	65	28	0	1	0	34	33	0	0	31	0	22	0	19	1
GSK2189892	UNC10225003A	3-Amino-6-aryl-indazole	Cl.Nc1n[nH]c2cc(ccc12)-c1ccccn1	0	0	0	17	0	0	0	10	0	0	6	0	11	17	0	0	0	16	0	1	0	0	0	0	0	8	0	0	32	22	0	0	0	12	0	32	0	0	0	0	23	0	25	0	0	0
SB-711239	UNC10225004A	3-amino-6-aryl-pyrazolopyridine	COc1ccccc1-c1ccc2c(NC(=O)C3CC3)n[nH]c2n1	1	2	2	9	0	88	0	0	18	29	52	0	11	19	0	2	3	18	5	13	9	0	11	17	0	0	0	12	0	6	0	0	10	16	5	2	0	2	32	11	4	33	12	27	0	0
GSK2344444	UNC10225005A	morpholino-triazolo-pyrimidinones	CC1CN(CCO1)c1cc(=O)n2nc(C)n(Cc3cccc(c3C)C(F)(F)F)c2n1	2	2	2	0	0	0	11	0	0	22	0	5	3	0	0	6	0	0	0	0	0	10	1	8	0	0	8	0	16	25	6	0	0	1	0	7	0	0	0	0	0	10	9	0	0	0
GSK2288359	UNC10225006A	3-Amino-6-aryl-indazole	OC(=O)C(F)(F)F.OC(=O)C(F)(F)F.Nc1n[nH]c2cc(ccc12)-c1cc(nc(N)n1)N1CCC[C@H](C1)C(=O)Nc1ccccc1	5	6	8	38	0	0	0	0	0	0	0	0	0	11	0	7	0	5	9	26	12	0	1	0	19	0	34	0	29	0	0	0	10	0	5	5	0	0	0	0	5	26	11	0	0	0
GW440137	UNC10225007A	4-anilinoquinoline	Cl.N(c1ccc2[nH]ncc2c1)c1ccnc2cc(ccc12)-c1ccccn1	2	5	10	18	63	73	28	71	1	57	94.6	19	3	38	0	0	0	31	0	0	14	11	0	19	1	3	22	4	18	40	0	31	0	0	7	20	0	2	0	47	11	36	18	5	0	0
GSK223675	UNC10225008A	2-aryl-4-anilino(pyridin-4-yl)-quinazoline and analogues	Cc1cccc(n1)-c1cc(Nc2ccncc2)c2ccccc2n1	6	9	8	12	0	0	0	0	88	0	0	0	0	11	0	0	0	26	0	8	6	8	11	9	9	0	1	0	9	11	0	0	0	1	0	0	0	0	0	0	17	25	26	6	0	0
GW775604	UNC10225009A	Biphenylamide	CN1CCN(CC1)c1cc(ccn1)C(=O)Nc1ccc(C)c(c1)-c1ccc(cc1)C(=O)NCC1CC1	3	3	4	0	45	0	0	0	0	16	0	0	1	0	0	0	6	0	0	0	0	0	0	0	0	2	0	0	0	0	0	0	0	0	0	0	0	0	0	0	0	0	0	0	0	0
GSK1379735	UNC10225010A	2-anilino-4-pyrrolidinopyrimidine	COc1ccc(Nc2nccc(n2)N2CCC(C2)NC(=O)C(C)c2ccc(Cl)cc2)cc1	1	1	4	14	0	0	18	14	19	0	0	0	22	17	0	9	0	25	0	21	0	22	10	4	0	24	49	16	25	33	19	0	4	27	0	0	7	0	0	17	9	5	14	0	14	25
GSK1627798	UNC10225011A	4-6-di-Ar-quinoline	Nc1ncc(cc1S(=O)(=O)N1CCOCC1)-c1ccc2nccc(-c3ccncc3)c2c1	11	12	18	18	0	0	13	0	0	0	0	0	49	24	0	12	0	30	0	0	5	0	0	0	0	0	6	36	24	100	0	0	0	16	15	8	0	0	0	12	27	0	36	16	0	0
GW440132	UNC10225013A	4-anilinoquinoline	Cl.COc1cc2nccc(Nc3ccc(NC(=O)c4ccc(C)cc4)c(O)c3)c2cc1OC	5	8	10	12	28	0	16	0	13	0	0	0	10	41	0	1	0	6	0	0	0	0	0	0	7	50	57	0	7	95.5	1	0	0	22	0	36	0	3	32	31	15	0	20	6	0	0
SB-317661	UNC10225014A	3-anilino-4-aryl maleimide	Clc1ccc(cc1)C1=C(Nc2ccccc2)C(=O)NC1=O	1	1	1	0	12	30	0	0	0	0	0	0	0	0	0	0	0	77	0	0	5	0	0	0	19	45	0	0	0	0	0	45	28	0	24	0	0	5	0	54	0	0	2	0	18	7
GSK301362	UNC10225015A	indole carboxamides	NC(=O)c1cc(cc2c(c[nH]c12)C1CCNCC1)-c1ccccc1	6	10	16	9	2	0	22	52	0	0	6	0	0	19	0	14	27	29	6	45	0	31	0	2	6	1	57	47	65	16	28	0	4	5	3	16	20	18	0	8	30	87	69	18	0	0
GW701424	UNC10225016A	2-aminobenzimidazole	Cl.COC(=O)Nc1nc2cc(Oc3ccc(NC(=O)Nc4cc(F)ccc4F)cc3)ccc2[nH]1	18	22	28	30	94.5	40	74	0	0	0	0	0	7	40	0	4	0	28	0	8	12	0	13	0	0	94.5	50	93.5	3	25	0	0	24	9	53	0	0	0	6	77	4	27	20	7	0	0
GSK2298859	UNC10225018A	3-Amino-6-aryl-indazole	CNc1nc(cc(n1)-c1ccc2c(N)n[nH]c2c1)N1C[C@H](CC[C@H]1C)C(=O)Nc1ccccc1	3	8	11	12	1	0	2	0	0	0	12	0	22	26	0	2	0	3	0	0	1	25	0	12	12	16	43	8	36	0	0	0	0	15	0	9	0	21	0	22	28	6	25	6	87	82
GSK1398468	UNC10225019A	Biphenylamide	Cc1ccc(NC(=O)Nc2cccc(Cl)c2)cc1-c1ccc(cc1)C(=O)Nc1ccncc1	9	10	12	37	0	1	17	0	0	0	1	0	5	34	0	8	0	20	7	13	17	6	2	0	15	14	44	0	29	0	0	0	0	0	67	13	100	9	0	53	7	28	13	0	0	0
AH20685	UNC10225020A	imidazotriazine fragment	c1nc2nccnn2c1-c1ccccc1	0	0	0	0	0	0	5	17	0	0	0	0	0	17	0	0	0	20	0	0	0	0	0	0	0	13	0	0	0	37	0	0	0	0	33	22	0	0	6	0	0	0	0	0	0	0
GSK1917008	UNC10225021A	Biphenylamide	Cc1ccc(NC(=O)c2cccc(c2)N2CCCCC2)cc1-c1ccc(cc1)C(=O)NCC1CC1	10	14	15	0	0	0	25	14	0	6	10	2	27	1	0	8	2	19	0	28	3	28	12	11	0	0	7	5	13	72	0	2	0	26	88	22	6	3	0	23	9	27	11	0	0	0
GSK1379713	UNC10225022A	2-anilino-4-pyrrolidinopyrimidine	CC(C(=O)NC1CCN(C1)c1ccnc(Nc2ccc(F)cc2)n1)c1ccc(Cl)cc1	0	0	1	14	0	0	9	0	0	0	0	0	0	13	0	0	0	5	10	0	4	0	0	0	0	36	47	11	16	32	0	0	0	0	0	0	5	0	0	18	8	37	8	13	0	0
GSK977617	UNC10225023A	4-aryl-7-azaindole	NCCNS(=O)(=O)c1ccc(cc1)-c1ccnc2[nH]ccc12	42	65	93	67	0	9	22	0	3	0	2	0	0	32	77	15	88	60	50	60	0	45	30	21	51	71	92.4	93	97.4	49	10	0	18	2	0	0	28	25	0	69	58	52	78	44	16	2
GSK977617	UNC10225023B	4-aryl-7-azaindole	NCCNS(=O)(=O)c1ccc(cc1)-c1ccnc2[nH]ccc12	33	49	63	57	0	0	1	0	0	0	0	0	6	21	66	10	83	36	38	31	0	17	5	18	39	67	84	87	93.3	16	0	22	27	0	0	9	5	0	0	81	42	70	72	21	6	0
GSK2297543	UNC10225024A	morpholino-imidazo-pyrimidinones	FC(F)(F)c1cccc(Cn2ccn3c2nc(cc3=O)N2CCOCC2)c1	2	2	2	0	0	0	3	5	0	0	0	0	21	16	0	0	15	0	4	0	5	0	0	0	13	0	4	18	18	16	0	0	0	20	0	2	0	7	0	13	4	36	6	0	0	0
SB-610250	UNC10225025A	4-pyridinyl_ortho-aryl_azoles	COc1cccc(c1)-c1nc([nH]c1-c1ccncc1)-c1ccccc1	7	10	12	2	0	8	27	24	0	0	0	2	8	77	0	0	0	18	17	2	0	0	2	11	0	39	0	15	0	60	0	0	0	0	74	16	0	0	0	95.6	1	0	5	0	0	0
SB-711880	UNC10225026A	3-amino-6-aryl-pyrazolopyridine	Oc1ccccc1-c1ccc2c(NC(=O)C3CC3)n[nH]c2n1	2	8	14	17	68	44	55	0	0	0	0	0	3	17	0	0	0	0	90	0	0	0	0	34	31	81	6	18	41	0	0	0	8	0	0	0	38	19	0	2	0	9	4	0	0	0
GSK1269851	UNC10225027A	4-aryl-7-azaindole	Cl.Cl.NCC(C(=O)Nc1cc(Br)c(s1)-c1ccnc2[nH]ccc12)c1ccccc1	23	33	44	78	14	32	35	47	67	0	5	0	65	95.7	61	25	66	39	0	0	0	0	0	26	81	9	53	57	99.8	0	78	0	30	12	1	7	6	0	0	59	0	24	0	0	100	100
GSK189015	UNC10225028A	2-aryl-4-anilino(pyridin-4-yl)-quinazoline and analogues	Cc1ccc(s1)-c1nc(Nc2ccncc2)c2ccccc2n1	3	3	5	12	0	0	21	34	0	17	11	29	21	4	55	19	3	26	0	20	65	17	1	11	0	0	24	20	37	29	0	0	0	23	6	4	20	0	0	34	15	27	12	2	0	0
GSK1292139	UNC10225029A	carboxamide pyrimidine	Cc1cccc(Nc2nc(NCCN)ncc2C(N)=O)c1	14	33	47	78	5	28	0	0	0	0	0	0	5	42	0	0	0	46	0	0	94.9	64	0	8	18	0	25	9	77	1	0	0	70	0	3	0	10	0	0	66	59	98.1	84	23	0	0
GSK2250882	UNC10225030A	3-Amino-6-aryl-indazole	CC(C)c1cc(nc(N)n1)-c1ccc2c(N)n[nH]c2c1	1	6	9	53	0	0	13	0	0	0	0	0	13	37	0	17	0	0	0	0	8	0	0	7	0	18	56	0	72	5	0	0	4	18	0	14	40	22	0	60	21	0	23	6	0	0
SB-222516	UNC10225031A	4-pyrimidinyl_ortho-aryl_azoles	CNc1nccc(n1)-c1c(ncn1CCCN1CCOCC1)-c1ccc(F)cc1	3	6	6	0	23	0	12	8	19	4	4	15	1	0	18	0	14	12	0	9	39	0	9	12	0	11	21	14	0	17	13	0	30	3	6	0	0	3	0	0	0	0	0	0	8	16
GSK1379766	UNC10225032A	2-anilino-4-pyrrolidinopyrimidine	COc1cc(Nc2nccc(n2)N2CCC(C2)NC(=O)Nc2ccc3OCOc3c2)cc(OC)c1OC	5	10	18	66	0	0	0	11	0	0	0	0	0	69	0	2	0	63	2	10	36	24	4	12	86	69	90.1	0	74	0	0	0	30	0	12	0	0	0	0	43	28	34	19	9	0	0
GSK1379767	UNC10225033A	2-anilino-4-pyrrolidinopyrimidine	COC(=O)c1cccc(NC(=O)NC2CCN(C2)c2ccnc(Nc3cc(OC)c(OC)c(OC)c3)n2)c1	5	9	14	68	0	0	1	33	0	35	6	0	21	60	0	0	0	50	16	9	20	10	0	0	72	39	73	0	60	0	11	0	26	30	0	8	0	0	37	48	35	38	14	0	0	0
GSK1379708	UNC10225034A	2-anilino-4-pyrrolidinopyrimidine	Fc1ccc(Nc2nccc(n2)N2CCC(C2)NC(=O)c2cccc(c2)C#N)cc1	0	0	1	0	0	0	4	31	0	0	0	0	0	20	0	0	0	26	16	0	0	0	0	0	0	0	33	20	22	32	0	0	0	6	0	16	0	0	0	31	9	0	5	0	0	0
GW281179	UNC10225035A	4-anilino-quinazoline and analogues	Cn1cncc1-c1cc2c(Nc3ccc(OCc4ccccc4)cc3)ncnc2cn1	8	9	11	20	0	0	12	5	0	0	18	0	7	24	0	5	0	23	0	0	0	13	9	0	0	25	5	0	4	27	13	0	8	1	0	19	0	2	0	34	20	25	14	0	0	0
GW775610	UNC10225036A	Biphenylamide	Cc1ccc(NC(=O)c2ccnc(c2)N2CCCCC2)cc1-c1ccc(cc1)C(=O)NCC1CC1	10	13	17	0	55	0	54	0	0	0	0	0	0	0	0	0	0	10	19	0	0	2	0	0	66	25	35	31	10	10	0	0	0	0	77	12	9	6	0	0	0	24	0	0	0	0
GW818941	UNC10225037A	4-pyrimidinyl-azoles	C1COc2cc(Nc3nccc(n3)-c3cnn4nc(ccc34)-c3ccccc3)ccc2O1	4	6	6	0	0	0	12	24	0	32	11	13	0	9	0	10	18	0	19	25	4	15	7	0	0	0	26	11	27	12	0	0	12	8	0	9	0	0	14	28	29	12	8	0	0	5
SB-390769	UNC10225038A	3-anilino-4-aryl maleimide	COc1cccc(c1)C1=C(Nc2ccc(Cl)c(c2)C(O)=O)C(=O)NC1=O	69	70	69	9	11	100	16	15	0	100	5	0	0	22	0	0	0	36	6	2	99.4	24	12	100	0	39	23	3	16	10	0	0	100	0	13	38	0	0	25	44	0	28	0	0	0	0
GSK2606590	UNC10225039A	7-alkyl-5-aryl-4-aminopyrrolopyrimidine	Cn1cc(-c2ccc3N(CCc3c2)C(=O)Cc2cccc(Cl)c2)c2c(N)ncnc12	14	20	28	30	78	30	53	0	0	0	53	0	0	1	0	10	0	30	4	20	0	13	9	19	23	89	65	96.3	18	69	0	0	4	4	11	56	7	0	0	0	26	0	32	25	0	0
GW659009	UNC10225040A	2,4-dianilinopyrimidine	Cl.NC(=O)c1cccc(Nc2nccc(Nc3ccc(Oc4c(Cl)cccc4Cl)c(Cl)c3)n2)c1	13	21	26	15	67	0	85	0	100	0	0	7	0	14	0	0	0	3	0	0	3	0	0	0	0	17	43	5	56	45	100	0	0	0	6	76	0	0	36	17	14	0	2	0	0	0
GSK1581428	UNC10225041A	4-aryl-7-azaindole	Cl.Cl.NC[C@H](CC1CCCCC1)NC(=O)c1ccc(s1)-c1ccnc2[nH]ccc12	60	80	101	75	0	0	8	5	0	61	0	0	13	2	94.1	93.4	98.1	37	77	72	0	89	0	26	93.8	96.8	73	96.3	99.1	0	8	23	1	2	0	5	11	17	0	44	37	0	36	9	0	0
GSK204919	UNC10225042A	2-aryl-4-anilino(pyridin-4-yl)-quinazoline and analogues	COc1ccc2nc(nc(Nc3ccncc3)c2c1)-c1cccc(C)n1	6	9	11	0	0	0	12	0	86	0	0	0	25	3	0	5	0	24	0	16	0	6	8	0	0	3	6	2	3	31	0	0	0	27	0	8	4	0	0	38	5	0	2	0	0	0
SB-381891	UNC10225043A	3-anilino-4-aryl maleimide	COc1ccccc1C1=C(Nc2cccc(O)c2)C(=O)NC1=O	7	12	18	30	23	35	27	15	0	0	0	0	0	46	0	11	100	22	0	0	0	0	0	0	0	29	5	0	0	43	0	0	23	0	7	18	2	0	0	51	8	0	16	28	0	0
GW876019	UNC10225044A	2-aryl-4-anilino(pyridin-4-yl)-quinazoline and analogues	Cc1cccc(n1)-c1nc(Nc2cccc(c2)C(N)=O)c2ccccc2n1	1	3	6	0	25	20	15	0	83	12	19	0	20	26	9	0	0	22	31	0	0	6	17	0	0	30	12	0	11	21	74	0	14	0	0	9	18	0	9	16	0	0	0	9	0	0
GSK1440913	UNC10225045A	2-anilino-4-aryl-pyrimidine	Cc1cc(cc(C)c1O)-c1ccnc(Nc2cccc(c2)C#N)n1	32	42	55	79	25	1	37	96.5	0	8	88	17	35	72	0	0	0	7	17	32	9	23	0	11	47	19	70	51	99.5	0	0	0	16	25	4	25	2	0	14	52	24	24	8	22	13	11
GW810437	UNC10225046A	Biphenylamide	COc1ccc(NC(=O)c2ccoc2)cc1-c1ccc(cc1)C(=O)NCC1CC1	0	0	0	0	24	1	5	0	4	0	17	10	0	0	15	0	0	0	19	0	7	0	30	0	1	33	0	0	0	21	7	2	46	3	0	0	0	4	0	2	0	19	0	9	0	0
GSK260205	UNC10225047A	aminofurazan	OC(=O)C(F)(F)F.OC(=O)C(F)(F)F.CCn1c(nc2c(ncc(OCCCN)c12)-c1ccccc1)-c1nonc1N	38	47	54	14	0	9	16	38	61	0	0	0	46	26	72	75	74	25	0	0	0	0	0	0	0	36	0	0	8	20	0	0	2	0	0	0	0	0	0	96.2	7	7	6	4	0	0
GW694077	UNC10225048A	4-anilinoquinoline	N(c1c[nH]nc1-c1ccccn1)c1ccnc2ccccc12	37	52	59	82	0	0	0	30	0	0	0	0	3	51	0	2	0	21	0	0	75	0	0	1	15	45	78	0	100	28	0	3	47	6	0	0	0	0	0	88	20	49	30	9	21	17
GW494610	UNC10225049A	4-anilinoquinoline	Cl.COc1cc(Nc2ccnc3cc(ccc23)-c2ccncc2)cc(OC)c1OC	24	39	45	0	97.9	99.4	93	99.5	86	0	54	88	98.6	14	0	10	0	29	5	32	0	12	0	0	0	82	27	31	0	94.9	62	99	10	37	60	19	0	9	90	42	20	2	0	9	0	0
SB-742609	UNC10225050A	3-amino-6-aryl-pyrazolopyridine	Brc1cc2c(NC(=O)C3CCCC3)n[nH]c2nc1-c1nccs1	5	11	13	15	7	1	25	7	0	0	11	0	0	14	0	10	1	26	0	18	0	0	0	13	0	13	11	0	0	31	0	0	13	0	12	26	93	85	0	37	0	20	1	8	0	0
GW697465	UNC10225051A	2-aminobenzimidazole	Cl.COC(=O)Nc1nc2cc(Oc3ccc(NC(=O)Nc4cc(ccc4Cl)C(F)(F)F)cc3)ccc2[nH]1	33	48	48	0	97	32	89	0	0	0	0	0	82	48	0	0	0	30	0	0	0	0	11	0	0	86	53	98	8	63	0	0	21	95.2	41	12	0	0	7	67	5	0	13	0	0	0
GSK1379761	UNC10225052A	2-anilino-4-pyrrolidinopyrimidine	COc1cc(Nc2nccc(n2)N2CCC(C2)NC(=O)C2COc3ccccc3O2)cc(OC)c1OC	4	6	10	66	0	0	3	20	0	22	13	0	10	65	0	9	0	18	11	0	24	2	0	5	51	72	75	17	57	16	0	0	26	16	0	2	9	0	53	53	21	25	8	8	8	0
GW567145	UNC10225054A	4-anilinoquinoline	C(CN1CCOCC1)NCc1ccc(o1)-c1ccc2c(Nc3ccc(Oc4ccccn4)cc3)ccnc2c1	11	17	26	6	78	12	6	8	0	0	14	0	2	31	0	10	0	0	0	0	34	44	0	0	22	71	9	0	0	86	0	0	14	20	0	85	0	0	86	54	26	0	2	0	0	0
GSK1229782	UNC10225056A	2-anilino-4-aryl-pyrimidine	COc1ccc(Nc2nccc(n2)-c2cccc(NC(=O)c3cc4cc(F)ccc4[nH]3)c2)cc1	1	4	6	47	85	78	53	9	0	13	19	0	8	61	0	18	31	29	34	18	0	28	0	0	16	0	66	9	57	41	10	0	15	16	0	22	4	12	31	64	36	0	20	13	0	0
GW681251	UNC10225057A	4-pyridinyl (with 2 aryl) _ortho-aryl_azoles	Clc1ccc(cc1)-c1cc(ccn1)-c1c[nH]nc1-c1ccccn1	2	3	9	2	0	0	15	12	44	33	52	0	13	4	27	0	0	19	2	0	0	4	0	0	4	8	17	0	23	35	0	0	0	10	0	0	0	0	0	31	0	0	2	0	0	0
SB-219980	UNC10225058A	4-pyrimidinyl_ortho-aryl_azoles	Nc1nccc(n1)-c1c(ncn1C1CCN(Cc2ccccc2)CC1)-c1ccc(F)cc1	9	11	14	0	0	0	0	7	0	0	0	9	0	55	15	0	0	16	0	3	59	15	0	0	21	22	0	9	0	0	0	2	0	0	0	0	0	0	0	38	12	56	0	0	0	0
SB-548492	UNC10225060A	3-amino-5-aryl-pyrazolopyridine	CC(=O)Nc1n[nH]c2ncc(cc12)-c1ccccc1	4	8	10	0	49	20	11	13	2	37	10	0	0	0	0	0	5	0	10	1	20	0	20	23	16	17	32	21	7	28	30	21	47	13	0	0	21	0	0	0	35	0	18	0	4	0
SB-390770	UNC10225061A	3-anilino-4-aryl maleimide	COc1cccc(c1)C1=C(Nc2cccc(c2)C(O)=O)C(=O)NC1=O	2	2	4	3	0	0	6	15	18	17	40	4	0	8	2	0	0	0	45	16	70	0	5	4	21	31	14	0	15	1	12	0	10	14	0	7	0	17	0	8	3	30	0	33	22	33
SB-390532	UNC10225063A	3-anilino-4-aryl maleimide	OC(=O)c1cc(NC2=C(C(=O)NC2=O)c2ccccc2)ccc1Cl	0	1	1	8	20	3	11	0	0	0	1	0	12	46	0	13	0	39	0	0	1	0	8	0	10	32	0	0	0	20	0	0	31	4	0	15	0	0	0	57	0	29	0	0	0	0
SB-390534	UNC10225065A	3-anilino-4-aryl maleimide	Oc1cccc(NC2=C(C(=O)NC2=O)c2ccccc2)c1	3	3	3	0	22	5	1	22	0	0	0	0	0	0	0	0	0	0	0	0	0	0	0	4	12	35	0	27	4	6	2	0	10	15	0	0	2	0	0	0	0	0	0	0	17	0
GSK1379944	UNC10225066A	2-anilino-4-aminopyrimidine	Fc1ccc(CNc2nccc(NCCNC(=O)c3cc4ccccc4s3)n2)cc1	6	16	27	0	0	4	16	14	0	0	0	0	24	15	0	18	0	35	0	14	51	0	0	0	66	34	27	0	27	20	0	0	14	24	2	20	0	0	0	5	0	0	0	0	0	0
GSK1649598	UNC10225068A	4-pyrimidinyl_ortho-aryl_azoles	CC(C)c1nc(c(s1)-c1ccnc(Nc2ccc3CCN(C)Cc3c2)n1)-c1cccc(NS(=O)(=O)c2ccccc2)c1	85	112	121	25	99.8	97.3	98.7	99	93.5	24	94.5	80	100	97.4	0	4	0	0	82	94.5	42	6	0	4	23	52	55	68	0	99.6	81	99.9	9	96.2	99.9	99.4	24	46	84	82	57	0	42	11	0	0
GSK336313	UNC10225069A	benzimidazole_N-thiophenes	COc1cc2ncn(-c3cc(OCc4ccncc4)c(s3)C(N)=O)c2cc1OC	4	6	6	58	0	7	0	9	0	0	0	0	0	20	0	1	0	20	0	0	0	16	6	0	17	0	4	0	14	0	0	0	0	2	0	0	0	0	0	4	24	24	25	47	0	0
GSK2192730	UNC10225070A	3-Amino-6-aryl-indazole	Nc1n[nH]c2cc(ccc12)-c1cccc(N)n1	2	6	9	56	10	0	0	0	0	0	9	0	1	0	0	0	0	21	0	0	17	0	0	13	8	15	22	0	74	0	2	16	0	1	0	0	55	37	0	0	29	0	30	9	0	0
GSK2634140	UNC10225071A	7-alkyl-5-aryl-4-aminopyrrolopyrimidine	Cn1cc(-c2ccc3N(CCc3c2)C(=O)Cc2cc(F)cc(F)c2F)c2c(N)ncnc12	8	20	27	0	82	29	57	0	15	0	0	0	6	19	0	0	0	8	18	13	12	20	0	0	18	92.6	59	89	33	72	0	5	0	11	0	22	6	0	0	9	15	7	28	0	0	0
GW693028	UNC10225072A	4-pyridinyl (with 2 aryl) _ortho-aryl_azoles	N#Cc1ccc(cc1)-c1cc(ccn1)-c1c[nH]nc1-c1ccccn1	0	2	5	0	7	29	10	59	56	0	40	0	0	20	0	0	0	25	0	49	0	27	0	0	0	32	0	0	11	17	0	15	6	5	11	30	0	0	0	34	1	3	1	0	0	1
GW829058	UNC10225073A	4-pyrimidinyl_ortho-aryl_azoles	Fc1ccc(Nc2nccc(n2)-c2c(nn3ncccc23)-c2ccc(Cl)cc2)cc1F	1	3	4	0	0	17	19	0	20	0	0	0	0	0	18	9	15	43	17	0	10	0	2	26	32	27	0	1	0	0	18	18	32	5	37	6	0	4	75	35	22	13	32	0	16	18
GW582868	UNC10225074A	2,4-dianilinopyrimidine	Cl.Cc1ccc(Nc2ccnc(Nc3ccc(C)c(F)c3)n2)cc1O	11	16	21	0	3	47	70	88	0	53	92.9	62	14	74	0	0	0	38	0	0	0	40	0	0	0	0	19	32	29	51	7	30	7	12	50	50	0	0	0	44	1	34	0	0	96.6	95.3
GSK2219329	UNC10225075A	3-Amino-6-aryl-indazole	CN(C)c1cc(nc(N)n1)-c1ccc2c(N)n[nH]c2c1	2	3	3	10	0	0	0	0	0	0	1	0	9	23	0	0	0	0	0	11	10	0	0	0	0	10	9	0	32	2	0	0	0	13	0	0	0	0	0	24	4	0	9	0	0	0
GSK361061	UNC10225076A	4-pyrimidinyl_ortho-aryl_azoles	Cc1ccc(F)c(C(=O)Nc2cccc(c2)-c2nn3ccccc3c2-c2ccnc(Nc3cccc(F)c3)n2)c1F	21	30	35	16	26	0	62	23	60	7	43	38	0	37	0	7	0	7	8	17	33	20	2	27	29	4	59	56	35	91.3	10	0	8	48	68	74	12	0	0	42	26	0	18	12	5	0
GSK2286775	UNC10225077B	3-Amino-6-aryl-indazole	Cl.Cl.Nc1n[nH]c2cc(ccc12)-c1cc(nc(N)n1)N1CCCC(C1)NC(=O)c1ccccc1	9	11	17	76	0	2	4	15	0	0	0	0	8	36	0	0	0	35	0	0	22	0	0	11	97.6	96.4	92.9	80	80	0	0	0	0	3	4	3	0	0	0	32	18	26	13	10	0	0
GSK1383281	UNC10225078A	4-aryl-7-azaindole	Cl.Cl.CC(C)NCC(Cc1ccccc1)NC(=O)c1cc(Br)c(s1)-c1ccnc2[nH]ccc12	19	35	51	25	0	14	5	0	0	0	0	0	14	87	90	73	86	32	57	41	17	62	0	11	95.1	93.8	91.7	74	79	0	0	0	8	5	0	0	0	0	0	43	34	29	27	0	0	0
GW664114	UNC10225079A	4-anilinoquinoline	N#Cc1cnc2cc(ccc2c1Nc1ccc(Oc2ccccc2)cc1)-c1cnc(CNCCN2CCOCC2)s1	38	52	60	31	97.4	49	58	0	0	0	0	0	0	36	0	0	0	34	21	30	45	10	5	9	0	39	25	98	9	99	0	0	8	62	0	0	0	44	93.9	37	22	24	12	24	0	0
GSK1379757	UNC10225080A	2-anilino-4-pyrrolidinopyrimidine	COc1cc(Nc2nccc(n2)N2CCC(C2)NC(=O)C(C)c2ccc(Cl)cc2)cc(OC)c1OC	2	3	5	37	0	0	7	4	0	0	12	0	3	69	0	0	0	22	17	0	17	34	0	0	52	60	72	13	40	28	0	0	4	1	0	11	0	0	0	48	22	0	9	0	0	0
GSK357952	UNC10225081A	4-pyrimidinyl_ortho-aryl_azoles	Fc1cccc(Nc2nccc(n2)-c2c(nn3ccccc23)-c2cccc(NC(=O)c3c(F)ccc(F)c3Cl)c2)c1	14	24	26	0	26	0	25	1	0	16	13	18	16	0	0	9	0	0	20	21	2	0	1	6	0	7	66	19	25	97.2	0	0	0	63	36	69	5	0	42	29	12	21	12	0	0	0
GW809893	UNC10225082A	2,4-Dianilinopyrimidine	CN(c1ccc(NC(=O)Nc2cc(ccc2F)C(F)(F)F)cc1)c1ccnc(Nc2ccc(cc2)S(N)(=O)=O)n1	83	100	116	9	98.1	75	98.5	0	1	0	14	4	0	7	17	11	9	73	27	19	78	1	0	17	90.7	95.7	67	93.3	26	96.7	28	20	78	71	66	76	15	8	25	0	48	0	38	0	0	4
GSK2258759	UNC10225083A	3-Amino-6-aryl-indazole	C[C@@H]1CCCCN1c1cc(nc(N)n1)-c1ccc2c(N)n[nH]c2c1	1	2	3	43	0	0	0	24	0	0	0	0	14	20	0	0	0	0	0	0	17	0	0	0	82	0	14	0	26	0	0	0	0	12	0	11	0	0	0	0	9	0	15	0	0	0
GW869516	UNC10225084A	imidazotriazine	COc1cc(Nc2ncc3c(C)nc(-c4cc5ccccc5[nH]4)n3n2)cc(OC)c1OC	12	26	32	0	32	24	21	0	8	9	24	0	22	3	8	0	0	0	89	61	0	0	0	0	0	1	26	26	9	60	22	0	0	25	0	36	0	14	0	0	19	0	8	0	1	8
GW273749	UNC10225085A	4-anilino-quinazoline and analogues	Cl.C(c1ccccc1)n1ncc2cc(Nc3ncnc4ccccc34)ccc12	4	4	7	30	38	17	0	5	0	0	0	0	7	22	0	13	0	16	0	0	0	0	0	1	10	8	0	0	0	17	0	0	0	0	0	0	0	0	0	0	28	13	17	23	2	0
GSK1379874	UNC10225086A	2-anilino-4-aminopyrimidine	Fc1ccc(Nc2nccc(NCCNC(=O)c3cc4ccccc4s3)n2)cc1	3	3	2	0	0	0	7	9	0	0	0	0	0	27	0	0	0	5	0	0	0	0	1	0	11	0	32	10	0	23	0	0	15	1	0	29	0	0	0	49	1	0	1	0	0	0
SB-334860	UNC10225087A	3-anilino-4-aryl maleimide	CN(C1=C(C(=O)NC1=O)c1ccccc1)c1ccccc1	0	1	1	7	0	0	0	1	0	0	4	0	12	15	0	23	0	0	0	23	9	42	12	0	21	10	0	0	0	0	0	0	0	13	0	2	0	0	0	0	6	34	3	0	7	11
GSK1379710	UNC10225088A	2-anilino-4-pyrrolidinopyrimidine	CC(=O)c1cccc(NC(=O)NC2CCN(C2)c2ccnc(Nc3ccc(F)cc3)n2)c1	0	1	3	16	0	0	0	0	0	10	13	0	25	41	0	2	0	25	0	0	19	31	20	0	12	0	21	5	25	0	0	0	10	16	0	4	6	0	0	33	20	39	16	7	0	0
GSK1804250	UNC10225089A	4-pyrimidinyl_ortho-aryl_azoles	CC(C)c1nc(c(s1)-c1ccnc(Nc2ccc(nc2)N2CCOCC2)n1)-c1ccc(F)c(NS(=O)(=O)c2c(F)cccc2F)c1	58	79	85	7	99.8	98.8	99.3	87	91.9	0	75	52	99.4	88	0	13	2	26	59	69	23	21	0	25	11	29	88	82	44	99.5	40	99.7	1	90	99.9	94.8	14	0	90	92.7	54	31	26	4	0	0
SB-340867	UNC10225090A	3-anilino-4-aryl maleimide	Oc1ccc(NC2=C(C(=O)NC2=O)c2ccc(Cl)cc2)cc1	3	3	3	3	28	0	0	11	0	0	0	0	0	0	1	0	0	0	0	0	0	0	0	0	0	9	0	18	4	0	0	0	0	21	0	0	0	0	0	0	100	0	99.8	0	0	0
GW583340	UNC10225091A	4-anilino-quinazoline and analogues	Cl.CS(=O)(=O)CCNCc1nc(cs1)-c1ccc2ncnc(Nc3ccc(OCc4cccc(F)c4)c(Cl)c3)c2c1	5	5	5	19	0	0	0	0	0	0	0	0	1	20	0	0	0	0	0	0	0	11	11	0	5	0	0	0	0	25	0	0	0	0	0	0	0	0	0	0	20	6	15	2	0	0
SB-342409	UNC10225092A	3-anilino-4-aryl maleimide	Clc1cccc(NC2=C(C(=O)NC2=O)c2ccccc2Cl)c1	10	11	15	7	0	9	16	12	0	0	0	70	20	0	0	100	0	41	0	11	0	14	8	0	0	22	0	0	15	2	0	0	0	19	0	22	0	0	0	22	0	3	21	18	10	0
GSK1379738	UNC10225093A	2-anilino-4-pyrrolidinopyrimidine	COc1ccc(Nc2nccc(n2)N2CCC(C2)NC(=O)c2cc3ccccc3s2)cc1	3	4	6	73	0	0	1	0	0	0	0	0	0	37	0	5	0	25	0	3	3	19	12	11	14	0	22	7	13	0	0	0	11	0	0	0	0	0	0	49	17	0	5	67	0	0
GW567143	UNC10225094A	4-anilinoquinoline	C(N1CCCCC1)c1ccc(o1)-c1ccc2c(Nc3ccc(Oc4ccccn4)cc3)ccnc2c1	14	18	26	0	85	24	24	0	0	32	0	0	0	8	0	14	0	26	0	0	9	12	0	24	10	80	44	8	8	95.5	0	0	0	6	2	96.5	6	0	0	18	28	0	19	0	0	0
SB-737856	UNC10225095A	aminofurazan	CCn1c(nc2cnccc12)-c1c(C)onc1N	5	5	7	0	0	13	13	21	0	0	0	0	23	24	0	18	0	35	4	0	0	25	0	0	0	32	4	0	22	0	0	0	3	0	0	0	6	0	0	20	0	0	0	0	0	0
GW709199	UNC10225096A	4-anilino-quinazoline and analogues	FC(F)(F)c1ccc(\C=C\c2cncnc2Nc2ccc3[nH]c(Cc4ccccc4)nc3c2)cc1	0	0	1	15	35	19	4	0	0	24	37	0	18	0	0	0	0	23	0	3	0	6	0	0	0	5	0	0	0	3	4	0	0	0	0	11	3	8	19	0	0	0	5	0	34	36
GW515532	UNC10225097A	4-pyrimidinyl_ortho-aryl_azoles	Cc1cccc2c(c(nn12)-c1ccc(F)cc1)-c1ccncn1	6	9	12	0	0	0	2	0	2	19	37	21	40	40	0	8	0	23	3	16	0	0	0	0	0	0	18	10	10	33	0	0	0	0	22	0	6	10	0	65	5	9	0	0	0	0
GSK1379879	UNC10225098A	2-anilino-4-aminopyrimidine	COc1cccc(NC(=O)NCCNc2ccnc(Nc3ccc(F)cc3)n2)c1	0	0	0	0	0	0	6	0	0	0	0	0	14	41	0	0	0	36	0	0	14	16	20	0	19	40	45	3	14	18	0	0	5	4	0	30	0	0	0	58	7	0	8	0	0	0
GW466413	UNC10225099A	4-anilinoquinoline	Cl.Cc1c(O)cccc1Nc1ccnc2ccc(cc12)C(F)(F)F	1	4	9	0	42	70	43	73	0	13	85	43	0	81	0	0	1	25	12	16	0	10	0	0	0	34	0	1	4	66	0	44	0	0	69	86	0	0	0	29	1	2	7	0	0	0
GSK1379860	UNC10225100A	2-amino-4-piperidinopyrimidine	COC(=O)c1cccc(NC(=O)NC2CCN(CC2)c2ccnc(NCc3ccc(F)cc3)n2)c1	0	0	0	0	0	0	14	0	0	0	23	0	5	18	0	0	0	30	0	0	0	10	0	4	0	0	13	9	13	24	0	0	9	11	2	10	0	0	0	21	0	67	0	0	0	0
GW707818	UNC10225101A	4-anilino-quinazoline and analogues	Fc1cccc(COc2ccc(Nc3ncnc4sc(cc34)-c3ccc[nH]3)cc2Cl)c1	6	8	8	0	0	0	0	9	2	5	16	4	1	24	0	7	0	0	10	36	12	6	21	0	6	0	9	0	24	0	25	0	1	6	0	0	1	16	5	25	25	9	22	0	0	0
GSK2227430	UNC10225103A	3-Amino-6-aryl-indazole	Nc1n[nH]c2cc(ccc12)-c1cc(nc(N)n1)N1CCCC1	0	0	3	17	0	0	0	0	0	0	0	0	0	2	0	3	0	4	0	0	4	17	0	0	0	0	37	0	33	7	0	0	0	1	0	20	0	0	0	30	25	3	20	0	0	0
GSK1379727	UNC10225104A	2-anilino-4-pyrrolidinopyrimidine	COc1ccc(CNC(=O)NC2CCN(C2)c2ccnc(Nc3ccc(OC)cc3)n2)cc1	0	0	0	0	0	0	2	0	0	0	0	0	3	59	0	0	0	28	0	0	0	0	0	0	5	22	56	7	11	43	0	0	30	6	0	9	0	0	12	56	18	47	21	0	0	0
GSK1379762	UNC10225105A	2-anilino-4-pyrrolidinopyrimidine	COc1cc(Nc2nccc(n2)N2CCC(C2)NC(=O)Nc2cc(C)ccc2C)cc(OC)c1OC	5	7	10	46	0	0	22	12	0	0	0	0	30	49	0	0	0	45	0	22	13	50	1	7	92.7	94.4	81	0	60	10	0	0	0	35	7	13	0	0	0	26	17	14	10	0	0	0
GW560109	UNC10225106A	4-anilinoquinoline	Fc1cc(Cl)ccc1Nc1ccnc2cc(ccc12)-c1ccc(CN2CCOCC2)o1	26	43	49	0	99.5	99.8	96.4	86	0	22	88	65	0	13	0	0	19	62	0	21	16	4	16	8	89	35	35	40	21	94.4	18	62	0	35	39	86	13	0	46	25	0	24	0	0	0	0
SB-731254-M	UNC10225107A	4-amino-3-aryl-thienopyridine and analogues	OC(=O)C(F)(F)F.Nc1ncnc2scc(-c3ccc(NC(=O)Cc4cc(F)ccc4F)cc3)c12	20	25	33	10	80	50	9	0	14	24	1	0	16	3	0	0	9	18	18	11	49	2	10	21	53	98.6	45	36	7	36	22	10	0	0	4	6	2	38	0	0	16	0	11	15	0	0
GSK1487252	UNC10225108A	4-aryl-7-azaindole	Cl.Cl.NC[C@H](Cc1ccc(cc1)C(F)(F)F)NC(=O)c1cc(Br)c(s1)-c1ccnc2[nH]ccc12	19	27	39	38	0	4	18	0	0	0	0	0	12	95.5	88	67	79	29	78	70	0	37	0	0	30	61	67	69	50	0	0	0	0	4	0	9	16	0	0	15	22	21	29	13	0	0
GW577382	UNC10225109A	4-anilinoquinoline	COc1cc(Nc2ccnc3ccc(cc23)C(F)(F)F)cc(OC)c1OC	2	5	7	8	27	19	28	67	0	0	0	52	86	54	0	20	0	22	0	25	12	10	6	19	49	0	7	12	0	34	0	22	22	16	8	8	0	10	35	23	17	38	14	1	0	0
GSK1379721	UNC10225110A	2-anilino-4-pyrrolidinopyrimidine	COc1cccc(NC(=O)NC2CCN(C2)c2ccnc(Nc3ccc(F)cc3)n2)c1	2	4	5	5	0	0	0	0	0	100	4	0	1	22	0	0	0	24	0	0	4	9	8	4	21	0	8	0	0	0	0	0	7	0	0	0	0	0	0	10	10	27	12	0	0	0
GSK1379753	UNC10225111A	2-anilino-4-pyrrolidinopyrimidine	COc1cc(Nc2nccc(n2)N2CCC(C2)NC(=O)Nc2cccc(c2)C(C)=O)cc(OC)c1OC	7	14	21	65	0	0	17	0	0	0	100	0	0	55	0	0	0	44	0	0	41	27	0	0	83	57	77	0	74	9	0	0	9	1	0	8	5	0	0	31	42	0	20	0	0	0
GSK1379706	UNC10225112A	2-anilino-4-pyrrolidinopyrimidine	COc1ccc(CNC(=O)NC2CCN(C2)c2ccnc(Nc3ccc(F)cc3)n2)cc1	0	0	3	32	0	0	2	49	0	0	5	0	29	48	0	0	0	0	0	0	8	16	11	0	35	20	19	10	0	3	6	0	22	26	3	21	0	3	18	50	5	0	4	8	0	0
GSK1379737	UNC10225113A	2-anilino-4-pyrrolidinopyrimidine	CCCc1ccc(cc1)S(=O)(=O)NC1CCN(C1)c1ccnc(Nc2ccc(OC)cc2)n1	7	7	9	0	0	0	14	0	0	0	0	0	0	66	0	0	0	30	0	0	0	0	0	0	0	32	0	0	0	30	0	0	8	0	0	6	0	0	0	47	5	0	11	0	0	0
SB-736715	UNC10225114A	Imidazolopyridine	CCn1c(nc2cnccc12)-c1cccnc1O	0	3	4	0	43	0	4	0	0	0	0	0	0	88	2	0	0	0	0	0	0	0	0	0	8	0	0	38	0	0	0	0	0	0	0	0	0	0	0	6	0	30	0	0	0	0
GW569716	UNC10225115A	4-anilino-quinazoline and analogues	Cl.Cl.CS(=O)(=O)CCNCc1nc(cs1)-c1ccc2ncnc(Nc3ccc4n(Cc5ccccc5)ncc4c3)c2c1	6	7	8	0	68	0	13	1	0	0	0	0	10	54	0	2	0	31	0	0	0	0	0	0	32	29	0	0	0	38	0	0	16	2	0	17	0	0	20	49	11	0	9	0	0	0
GW475620	UNC10225116A	4-pyridinyl_ortho-aryl_azoles	Fc1ccc(cc1)-c1nn2cccc(F)c2c1-c1ccncc1	7	8	8	13	0	0	2	11	23	0	47	22	12	9	0	14	29	16	42	19	0	16	8	0	0	45	46	3	34	20	24	0	0	8	29	11	0	0	0	53	6	39	10	40	0	0
GSK1693850	UNC10225117A	4-6-di-Ar-quinoline	Nc1ncc(cc1S(=O)(=O)N1CCCCC1)-c1ccc2nccc(-c3ccncc3)c2c1	10	15	20	0	0	0	9	53	0	2	9	37	65	33	0	1	0	22	0	1	35	0	14	0	59	31	35	52	14	0	0	0	0	22	8	18	0	0	0	13	18	6	25	2	4	0
GW789449	UNC10225118A	carboxamide thiophene	NC(=O)Nc1sc(cc1C(N)=O)-c1ccc(F)cc1	15	27	35	60	49	0	3	0	5	31	28	0	5	7	0	0	0	52	25	15	86	0	26	0	55	83	85	40	98.2	46	6	11	78	0	8	0	2	0	62	20	12	34	43	0	0	0
GSK2576924	UNC10225119A	4-amino-3-aryl-thienopyridine and analogues	Nc1nccc2scc(-c3ccc4N(CCc4c3)C(=O)Cc3ccccc3)c12	2	3	6	8	0	0	1	10	0	42	0	0	13	0	0	11	0	0	0	21	21	9	6	0	9	16	25	36	8	1	0	0	2	19	0	43	0	0	0	0	9	33	10	0	10	2
GW654607	UNC10225120A	2-aminobenzimidazole	Cl.COC(=O)Nc1nc2ccc(Oc3ccc(NC(=O)Nc4cc(ccc4F)C(F)(F)F)cc3)cc2[nH]1	46	58	60	17	99.4	57	94	0	0	0	0	0	1	54	0	100	0	18	19	15	13	9	12	15	0	92.3	42	97.3	10	67	18	0	0	0	62	20	0	0	0	13	2	51	0	0	0	0
SB-381904	UNC10225121A	3-anilino-4-aryl maleimide	COc1ccccc1C1=C(Nc2ccc(O)c(Cl)c2)C(=O)NC1=O	9	11	20	39	15	18	1	0	0	0	13	5	0	46	0	3	0	31	18	18	0	8	3	0	5	23	17	9	0	60	0	0	15	0	0	0	0	4	0	50	5	33	8	12	33	0
GW873004	UNC10225122A	2-aryl-4-anilino(pyridin-4-yl)-quinazoline and analogues	Clc1cccc(c1)-c1nc(Nc2ccncc2)c2ccccc2n1	1	2	6	0	51	14	28	0	72	25	15	9	30	20	11	0	1	33	30	9	0	0	13	0	0	17	10	0	10	19	21	4	10	43	0	24	1	23	0	31	0	0	0	0	1	4
SKF-97623	UNC10225123A	6-aminopurines and related	Cn1cnc2c(N)ncnc12	8	8	10	0	21	0	2	0	0	0	0	0	0	17	0	0	0	28	5	0	0	0	0	0	5	0	0	10	0	0	0	0	0	0	0	0	24	0	0	22	0	41	0	0	0	0
GSK1379825	UNC10225124A	2-anilino-4-piperidinopyrimidine	COc1cc(Nc2nccc(n2)N2CCC(CC2)NS(=O)(=O)c2ccc(NC(C)=O)cc2)cc(OC)c1OC	13	28	46	68	0	2	38	66	34	47	59	0	80	96.2	0	15	0	32	17	50	0	43	0	9	59	71	71	14	75	50	29	0	0	32	14	40	0	1	0	48	37	35	15	5	0	0
GW684088	UNC10225125A	4-pyridinyl (with 2 aryl) _ortho-aryl_azoles	Cc1ccc(cc1)-c1cc(ccn1)-c1c[nH]nc1-c1ccccn1	2	5	9	22	35	21	0	29	65	0	49	0	22	37	0	0	0	16	0	0	0	94.7	0	0	2	0	10	5	20	0	0	18	0	36	0	3	0	0	51	40	9	55	13	14	2	0
GW869640	UNC10225126A	2-aryl-4-anilino(pyridin-4-yl)-quinazoline and analogues	Cc1csc(n1)-c1nc(Nc2ccncc2)c2ccccc2n1	3	6	12	31	31	15	7	0	94.7	3	4	7	14	0	0	3	15	43	12	11	18	0	11	37	41	45	1	0	0	5	6	42	36	14	10	8	0	15	0	72	5	9	0	14	10	2
GSK1024304	UNC10225127A	benzimidazole_N-thiophenes	COc1ccc(COc2cc(sc2C(N)=O)-n2cnc3ccccc23)cc1	2	4	5	29	0	0	15	0	0	0	0	0	0	0	0	0	54	23	26	0	8	14	0	0	2	0	12	0	25	37	0	0	0	0	0	3	0	5	0	9	7	0	6	8	0	0
SB-386023	UNC10225128B	4-pyridinyl_ortho-aryl_azoles	Cl.Oc1cc(ccc1Cl)-c1nc([nH]c1-c1ccncc1)-c1ccccc1	5	11	19	58	56	32	44	14	72	0	71	0	0	10	0	0	0	0	3	0	0	0	12	27	22	19	0	42	3	48	9	61	32	0	98.2	31	0	1	0	92.5	0	0	27	74	0	0
GSK1379859	UNC10225129A	2-amino-4-piperidinopyrimidine	Fc1ccc(CNc2nccc(n2)N2CCC(CC2)NC(=O)Nc2ccc3OCOc3c2)cc1	2	2	4	0	0	0	0	0	0	0	0	0	0	30	0	5	0	9	0	0	0	6	0	0	11	0	24	2	7	43	0	0	0	3	0	4	0	0	0	7	16	0	16	0	0	0
GW567142	UNC10225130B	4-anilinoquinoline	Cl.C(N1CCNCC1)c1ccc(o1)-c1ccc2c(Nc3ccc(Oc4ccccn4)cc3)ccnc2c1	14	23	29	2	99.7	84	42	0	0	0	41	0	0	18	0	0	0	15	0	0	0	12	0	0	20	77	27	0	0	86	0	0	2	4	0	92.7	0	0	76	38	29	0	20	0	0	0
GSK2296823	UNC10225131A	morpholino-imidazo-pyrimidinones	Clc1cccc(Cn2ccn3c2nc(cc3=O)N2CCOCC2)c1	3	6	6	0	0	7	12	0	0	0	0	0	24	0	0	3	0	32	0	0	22	14	0	0	0	3	1	0	20	9	0	0	0	20	10	7	25	0	0	18	0	22	22	0	0	0
SB-219952	UNC10225132A	4-pyrimidinyl_ortho-aryl_azoles	CCOC(=O)N1CCC(CC1)n1cnc(c1-c1ccnc(N)n1)-c1ccc(F)cc1	10	11	13	0	60	2	0	28	33	0	0	10	15	20	7	0	24	0	99.8	4	0	0	0	0	19	37	19	19	4	1	10	0	22	13	14	0	0	19	32	0	0	48	3	0	0	0
GW591947	UNC10225133A	2-anilino-5-aryl-oxazole	Cl.CCS(=O)(=O)c1ccc(OC)c(Nc2ncc(o2)-c2ccc(F)cc2)c1	0	0	2	4	0	0	0	0	0	0	0	0	1	15	0	0	9	22	8	17	7	3	0	0	3	0	26	0	22	41	14	0	0	0	0	0	0	0	0	8	0	0	3	4	0	0
GSK1379729	UNC10225134A	2-anilino-4-pyrrolidinopyrimidine	COc1ccc(Nc2nccc(n2)N2CCC(C2)NS(=O)(=O)c2ccc(NC(C)=O)cc2)cc1	6	7	6	0	0	0	20	34	3	32	22	8	9	38	0	7	0	16	20	17	8	25	7	9	7	14	30	23	18	26	21	3	0	12	16	18	2	0	26	37	18	31	19	0	0	0
GSK1379760	UNC10225135A	2-anilino-4-pyrrolidinopyrimidine	COc1cc(Nc2nccc(n2)N2CCC(C2)NC(=O)c2cc3ccccc3s2)cc(OC)c1OC	6	11	14	58	0	0	7	28	0	16	11	0	0	26	1	8	0	19	45	30	12	17	20	100	59	68	86	14	70	100	0	0	13	1	4	11	0	4	67	26	17	49	14	18	0	1
GSK2299009	UNC10225136A	morpholino-imidazo-pyrimidinones	Clc1cccc(Cn2c3ccccc3n3c2nc(cc3=O)N2CCOCC2)c1Cl	3	4	5	31	0	0	16	0	0	0	0	6	13	36	0	21	0	25	5	16	6	0	2	0	17	7	46	59	38	50	2	0	0	1	0	17	8	22	0	0	43	34	36	13	0	0
SB-408010	UNC10225137A	3-anilino-4-aryl maleimide	Clc1cccc(c1)C1=C(N2CCc3ccccc23)C(=O)NC1=O	0	1	1	2	33	0	10	0	14	0	7	13	17	0	5	0	5	0	0	22	1	10	0	0	25	7	37	0	37	0	23	0	4	26	3	0	0	0	23	0	24	0	17	0	0	0
GW828205	UNC10225138A	4-pyrimidinyl_ortho-aryl_azoles	FC(F)(F)c1ccc(cc1)-c1nn2ncccc2c1-c1ccnc(Nc2cccc(c2)C(F)(F)F)n1	1	3	4	1	47	30	16	0	24	6	19	10	23	0	0	0	15	0	12	0	0	6	0	0	0	14	12	0	1	1	0	0	0	0	0	0	0	0	49	0	11	0	18	0	0	0
GW830707	UNC10225139A	2-amino-4-anilinopyrimidine	Cl.CN(c1ccc(NC(=O)Nc2cccc(Cl)c2)cc1)c1ccnc(N)n1	11	15	20	0	0	0	3	0	4	0	0	9	0	6	23	3	12	0	0	18	0	0	2	15	28	68	70	37	4	0	0	0	52	0	0	8	0	12	0	30	2	15	5	0	0	0
SB-743341	UNC10225140A	3-amino-6-aryl-pyrazolopyridine	Brc1cc2c(NC(=O)C3CCCC3)n[nH]c2nc1-c1cccs1	2	5	9	0	48	19	5	0	17	0	7	9	7	0	0	40	0	1	29	40	35	0	0	12	17	27	10	0	12	0	28	19	46	14	7	12	63	66	26	0	18	0	16	0	9	12
GW525701	UNC10225141A	4-anilinoquinoline	Cl.Cn1ccc(n1)-c1cccc(Nc2ccnc3cc(ccc23)-c2nccs2)c1	4	5	6	50	0	1	10	3	0	0	0	0	6	55	0	7	0	28	0	14	8	0	9	0	0	28	0	0	0	15	0	0	16	0	0	5	0	38	0	62	0	3	3	38	0	0
GSK1723980	UNC10225142A	4-pyrimidinyl_ortho-aryl_azoles	Cl.CC(C)c1nc(c(s1)-c1ccnc(Nc2ccc(nc2)N2CCOCC2)n1)-c1cccc(NS(=O)(=O)c2c(F)cccc2F)c1	84	98	110	7	99.7	95.6	99.4	95.9	89	0	81	83	100	100	0	11	0	19	74	91.4	5	1	0	20	41	42	50	74	19	99.8	67	99.7	0	94	100	96.4	16	37	41	93.1	47	13	32	2	0	0
GSK2283293	UNC10225143A	3-Amino-6-aryl-indazole	C[C@H]1CC[C@H](CN1c1cc(nc(N)n1)-c1ccc2c(N)n[nH]c2c1)C(=O)Nc1ccccc1	2	2	2	23	0	8	15	0	0	0	0	0	11	40	0	6	0	30	0	13	11	1	0	5	0	6	25	0	23	50	0	0	0	7	0	19	0	0	0	49	11	23	17	0	0	0
SB-710363	UNC10225144A	3-amino-6-aryl-pyrazolopyridine	Oc1ccc(cc1)-c1ccc2c(NC(=O)C3CC3)n[nH]c2n1	18	27	37	38	88	74	0	74	0	55	50	1	0	0	0	0	61	0	0	0	0	0	18	12	11	47	0	37	32	12	8	34	16	22	0	0	26	11	0	0	0	0	0	4	19	19
GSK2137462	UNC10225145A	2-amino-4-aryl-pyrimidine	Cl.Cl.Cl.N#Cc1ccc(CCNc2nccc(n2)-c2cccc(CN3CCNCC3)c2)cc1	3	5	7	14	10	0	9	11	0	0	0	0	23	22	0	5	5	15	25	14	15	17	20	4	20	0	15	44	25	0	0	0	0	12	0	8	0	2	0	0	31	0	29	24	11	3
GSK2193613	UNC10225146A	3-Amino-6-aryl-indazole	Nc1n[nH]c2cc(ccc12)-c1cccc(N)c1	13	17	19	55	34	37	21	11	0	0	19	0	3	16	0	0	23	0	0	16	16	0	0	0	10	0	46	0	82	87	0	89	3	5	0	8	58	51	0	21	29	21	25	4	0	0
GSK1379723	UNC10225147A	2-anilino-4-pyrrolidinopyrimidine	COc1cccc(CNC(=O)NC2CCN(C2)c2ccnc(Nc3ccc(F)cc3)n2)c1	3	4	5	6	0	1	8	10	0	0	0	0	10	35	0	12	0	43	0	12	0	24	0	9	11	37	49	6	19	0	0	0	3	7	10	17	0	0	0	27	14	23	14	0	0	0
GSK2286096	UNC10225148A	3-Amino-6-aryl-indazole	CC(C)(C)OC(=O)NC1CCCN(C1)c1cc(nc(N)n1)-c1ccc2c(N)n[nH]c2c1	6	7	9	60	0	0	6	0	0	0	0	0	8	5	0	0	0	36	0	0	7	19	0	0	52	66	53	5	10	0	0	0	0	8	16	13	0	0	0	0	16	25	21	11	0	0
SKF-12778	UNC10225149A	6-aminopurines and related	Nc1nc(N)c2nc([nH]c2n1)-c1ccccc1	0	1	3	23	18	15	9	6	18	27	26	3	0	22	15	8	15	0	17	14	63	73	7	15	3	13	1	19	3	0	0	0	7	0	1	16	0	0	0	23	0	18	0	0	0	0
SB-331032	UNC10225150A	3-anilino-4-aryl maleimide	COc1cccc(c1)C1=C(Nc2ccc(SC)cc2)C(=O)NC1=O	0	0	3	17	0	31	5	0	28	0	0	0	0	4	0	0	2	11	17	0	2	0	12	0	28	25	0	0	31	23	0	7	45	0	24	0	0	0	0	20	76	19	26	30	0	6
GSK1398460	UNC10225151A	Biphenylamide	Cc1ccc(NC(=O)c2ccc(Cl)c(Cl)c2)cc1-c1ccc(cc1)C(=O)Nc1ccncc1	9	12	12	8	26	4	41	6	0	0	2	0	9	20	0	15	0	41	21	21	18	10	16	0	7	1	67	100	40	45	0	0	0	6	34	10	7	10	0	6	27	28	24	0	0	0
GSK1379722	UNC10225152A	2-anilino-4-pyrrolidinopyrimidine	Fc1ccc(Nc2nccc(n2)N2CCC(C2)NC(=O)Nc2ccccc2F)cc1	6	6	6	0	0	0	9	25	0	0	0	0	20	40	0	13	0	26	2	21	0	12	8	16	0	38	30	0	8	16	0	0	13	7	7	5	17	0	12	44	0	0	0	0	0	0
GSK448459	UNC10225153A	benzimidazole_N-thiophenes	COc1cc2ncn(-c3cc(OCc4sccc4Cl)c(s3)C(N)=O)c2cc1OC	9	14	19	42	0	3	17	18	0	0	0	0	0	39	0	1	0	21	0	0	0	15	0	0	0	12	41	10	90	32	0	0	14	0	0	11	37	45	0	55	4	25	0	0	0	0
GSK1520489	UNC10225154A	2,4-dianilinopyrimidine	OC=O.CNC(=O)c1ccccc1Nc1nc(Nc2cccc(CS(C)(=O)=O)c2)ncc1C	145	178	203	85	99.9	99.9	99.4	76	71	7	54	2	0	33	0	0	0	95.1	96.4	97.9	39	99.1	0	13	100	99.9	96.8	100	99.2	99.6	0	99.9	99.3	97.2	59	99.7	65	79	95.4	88	76	14	40	29	1	0
GW663929	UNC10225155A	2,4-dianilinopyrimidine	O=C(NCCCN1CCOCC1)c1cccc(Nc2nccc(Nc3ccc(Oc4ccccc4)cc3)n2)c1	11	17	24	8	73	45	47	14	0	0	5	0	15	36	0	11	0	7	0	0	20	29	3	0	36	11	14	11	27	95.4	0	0	15	54	0	69	6	0	51	28	55	37	33	0	3	6
SB-736398	UNC10225156A	Imidazolopyridine	CCn1c(nc2cnccc12)-c1ccccn1	9	9	12	0	0	4	0	18	0	0	0	0	56	6	0	19	0	34	5	10	0	0	17	0	0	3	7	12	16	9	0	0	21	77	11	14	100	0	7	40	0	34	0	0	0	0
GSK1379751	UNC10225157A	2-anilino-4-pyrrolidinopyrimidine	COc1cc(Nc2nccc(n2)N2CCC(C2)NC(=O)c2cccc(c2)C#N)cc(OC)c1OC	11	15	17	75	0	0	3	98.8	0	0	0	0	4	50	0	0	0	14	0	0	24	26	0	0	68	36	56	22	90	0	0	2	11	0	0	0	0	100	0	61	3	22	0	0	0	0
GSK2276055	UNC10225158A	thienopyridinone	O=c1[nH]cc(-c2ccc(cc2)N2CCOCC2)c2sc(cc12)-c1cn[nH]c1	10	14	24	23	0	0	0	0	0	2	0	0	0	0	0	16	0	4	0	0	21	18	0	13	28	21	21	0	28	0	1	0	24	11	35	0	0	0	0	0	31	5	29	12	2	2
GSK1379765	UNC10225160A	2-anilino-4-pyrrolidinopyrimidine	COc1cccc(CNC(=O)NC2CCN(C2)c2ccnc(Nc3cc(OC)c(OC)c(OC)c3)n2)c1	8	16	23	54	0	0	20	0	0	0	14	0	24	92.3	0	17	0	72	0	2	42	45	7	0	85	91.4	79	30	53	9	0	0	23	23	0	34	0	0	42	81	35	35	17	0	0	0
GSK1379712	UNC10225161A	2-anilino-4-pyrrolidinopyrimidine	COC(=O)C(NC(=O)NC1CCN(C1)c1ccnc(Nc2ccc(F)cc2)n1)c1ccccc1	2	4	4	5	0	0	0	4	0	0	11	0	0	22	0	0	0	19	0	12	10	8	20	2	5	0	32	0	8	0	0	0	17	3	9	2	12	0	18	37	9	35	5	0	0	0
GSK1379812	UNC10225162A	2-anilino-4-piperidinopyrimidine	COc1ccc(Nc2nccc(n2)N2CCC(CC2)NC(=O)C(C)c2ccc(Cl)cc2)cc1	7	7	8	23	4	0	28	8	0	0	0	0	25	18	0	0	3	18	35	11	3	20	0	0	23	4	42	0	36	5	0	0	7	28	0	0	0	13	0	6	25	32	23	13	0	0
GI98581	UNC10225163A	4-pyridinyl_ortho-aryl_azoles	Fc1ccc(cc1)-c1nc2SCCn2c1-c1ccncc1	8	12	12	1	0	0	9	0	15	0	20	0	13	23	0	13	9	28	14	0	0	0	5	13	0	0	43	6	32	45	0	0	0	12	0	13	0	0	0	53	0	31	1	0	0	0
GSK1379725	UNC10225164A	2-anilino-4-pyrrolidinopyrimidine	COC(=O)c1cccc(NC(=O)NC2CCN(C2)c2ccnc(Nc3ccc(F)cc3)n2)c1	0	2	2	0	0	0	5	0	0	0	0	0	4	23	0	0	0	17	0	0	0	0	0	1	0	39	34	6	20	26	0	0	0	0	0	8	0	0	0	0	0	16	0	0	0	0
GSK2606414	UNC10225165A	7-alkyl-5-aryl-4-aminopyrrolopyrimidine	Cn1cc(-c2ccc3N(CCc3c2)C(=O)Cc2cccc(c2)C(F)(F)F)c2c(N)ncnc12	4	6	10	0	0	0	11	0	0	0	1	4	6	0	0	18	53	1	0	13	16	13	0	10	30	32	29	41	26	36	0	0	0	2	12	3	12	0	0	6	4	11	10	0	0	0
GSK1033723	UNC10225166A	thienopyridinone	Oc1ccc(cc1)-c1c[nH]c(=O)c2cc(sc12)-c1ccncc1	7	12	13	26	0	0	0	0	0	0	0	0	34	16	0	16	97.2	0	0	13	10	13	0	0	16	8	8	96.1	19	0	0	0	39	18	1	7	29	0	0	15	6	0	20	1	0	0
GSK2286295	UNC10225167A	morpholino-imidazo-pyrimidinones	Clc1cccc(Cn2ccn3c2nc(cc3=O)N2CCOCC2)c1Cl	4	5	6	6	0	0	3	0	0	0	3	0	27	6	0	13	10	48	0	16	5	24	0	0	12	18	23	100	24	35	0	0	0	25	0	8	13	0	0	0	14	8	18	0	0	0
SB-376715	UNC10225168A	3-anilino-4-aryl maleimide	Clc1ccccc1C1=C(Nc2ccccc2)C(=O)NC1=O	2	3	5	5	0	0	1	20	0	0	0	0	14	11	0	2	47	0	23	0	0	0	42	0	27	0	14	12	15	0	0	0	0	21	0	5	26	40	40	0	0	46	12	5	13	0
GW576604	UNC10225169A	4-pyridinyl (with 2 aryl) _ortho-aryl_azoles	c1[nH]nc(c1-c1ccnc(c1)-c1ccccc1)-c1ccccn1	1	2	6	23	0	0	0	0	37	0	42	0	1	12	0	0	0	14	0	0	0	0	4	0	14	0	3	0	23	37	1	0	4	3	0	0	0	0	0	34	14	10	14	0	0	0
GW284543	UNC10225170A	4-anilinoquinoline	Cl.COc1cc2nccc(Nc3cccc(Oc4ccccc4)c3)c2cc1OC	1	3	5	0	0	0	15	0	12	0	0	0	32	22	0	7	0	1	12	0	0	0	0	0	5	0	0	0	1	69	0	0	0	0	0	60	0	1	24	38	2	28	0	0	0	0
GW787226	UNC10225171A	2,4-dianilinopyrimidine	Cl.Cl.CN(c1ccc2c(C)n(Cc3ccccc3)nc2c1)c1ccnc(Nc2cccc(c2)S(N)(=O)=O)n1	22	30	40	2	98.4	61	71	0	6	0	0	12	0	0	0	0	0	0	17	0	0	0	0	0	29	54	38	73	0	82	3	0	1	6	95.8	89	0	0	0	0	2	0	0	11	0	0
GSK2608885	UNC10225172A	7-alkyl-5-aryl-4-aminopyrrolopyrimidine	Cn1cc(-c2ccc3N(CCc3c2)C(=O)Cc2ccccc2Cl)c2c(N)ncnc12	62	83	84	25	95.9	23	85	0	0	0	13	3	1	88	0	0	0	0	2	30	4	94	0	0	98	86	74	94	23	99.2	10	0	0	93.2	90.5	95.3	0	6	95.6	25	44	33	22	13	0	0
SB-236560	UNC10225173A	4-pyrimidinyl_ortho-aryl_azoles	Nc1nccc(n1)-c1c(ncn1C1CCN(CC(F)(F)F)CC1)-c1ccc(F)cc1	10	14	16	5	46	0	0	19	0	0	0	0	0	47	0	0	0	29	0	0	0	0	0	0	2	0	0	46	0	0	0	0	45	0	0	0	40	0	37	49	0	80	0	2	0	0
GSK299495	UNC10225174A	4-pyrimidinyl_ortho-aryl_azoles	Fc1cccc(F)c1C(=O)Nc1cccc(c1)-c1nn2ncccc2c1-c1ccnc(Nc2cccc(c2)C(F)(F)F)n1	24	33	36	2	18	9	35	9	0	0	0	0	1	28	0	1	0	22	0	15	0	12	1	3	9	29	56	6	19	95.9	0	0	23	72	69	71	0	0	66	80	32	30	21	9	100	100
GSK257997	UNC10225175A	2-aryl-4-anilino(pyridin-4-yl)-quinazoline and analogues	Cc1cccc(n1)-c1nc(C)cc(Nc2ccncc2)n1	8	11	14	99.8	0	0	6	15	78	0	7	0	18	24	0	3	0	20	3	12	0	0	0	0	21	0	13	7	21	32	14	0	2	27	0	2	0	0	0	9	10	12	14	99.4	0	0
GSK1322949	UNC10225176A	4-aryl-7-azaindole	Cl.Cl.NC(CNC(=O)c1cc(Br)c(s1)-c1ccnc2[nH]ccc12)c1ccccc1	35	51	73	82	21	10	25	38	0	0	10	0	40	76	66	15	88	59	73	46	38	0	0	20	67	35	95.2	90.8	100	44	0	12	58	5	0	0	50	40	0	77	42	34	63	27	45	39
GSK1379745	UNC10225177A	2-anilino-4-pyrrolidinopyrimidine	COc1ccc(Nc2nccc(n2)N2CCC(C2)NC(=O)Nc2ccc3OCOc3c2)cc1	0	1	2	3	0	0	18	1	0	0	5	0	17	41	0	7	0	20	24	24	2	9	9	5	6	13	43	22	33	25	13	0	23	13	2	10	0	2	32	33	8	0	8	4	0	1
GSK2342769	UNC10225178A	morpholino-triazolo-pyrimidinones	Cc1nn2c(nc(cc2=O)N2CCOCC2)n1Cc1cccc(Cl)c1Cl	3	6	8	14	0	0	9	12	0	0	0	42	10	4	0	14	0	29	0	2	0	20	5	7	0	3	0	4	2	18	0	0	4	12	7	1	0	0	0	12	9	28	8	8	0	0
SB-742251	UNC10225180A	3-amino-6-aryl-pyrazolopyridine	Brc1cc2c(NC(=O)C3CC3)n[nH]c2nc1-c1nccs1	4	9	10	15	0	22	7	6	0	0	11	0	15	19	0	1	0	26	10	8	0	0	4	21	0	31	13	15	36	0	0	0	63	0	13	2	95.3	90	26	48	0	19	0	0	0	0
GW869641	UNC10225181A	2-aryl-4-anilino(pyridin-4-yl)-quinazoline and analogues	Cc1cccc(n1)-c1nc(Nc2ccncc2)c2sccc2n1	12	16	20	25	0	16	0	0	96.5	42	41	14	0	8	5	0	3	33	20	27	12	0	25	29	48	43	30	33	13	15	4	82	37	11	36	6	0	7	58	54	24	16	24	7	3	9
GW440146	UNC10225182A	4-anilinoquinoline	Cl.Cc1ccc(cc1)C(=O)Nc1ccc(Nc2ccnc3cc(ccc23)-c2ccccn2)cc1O	5	9	12	4	68	31	18	0	0	0	25	0	0	0	0	19	0	27	4	15	33	0	0	0	29	80	90.1	0	39	98.4	0	0	0	14	0	29	0	0	46	54	39	13	20	0	0	0
GSK1379763	UNC10225183A	2-anilino-4-pyrrolidinopyrimidine	COc1cccc(NC(=O)NC2CCN(C2)c2ccnc(Nc3cc(OC)c(OC)c(OC)c3)n2)c1	5	16	24	74	0	0	0	0	0	89	0	0	0	59	0	7	0	45	0	0	40	18	0	11	75	55	89	13	78	0	0	0	8	2	5	0	0	0	0	18	26	35	4	17	0	0
GW679396	UNC10225184A	4-pyridinyl (with 2 aryl) _ortho-aryl_azoles	FC(F)(F)c1ccccc1-c1cc(ccn1)-c1c[nH]nc1-c1ccccn1	5	5	4	21	0	0	1	0	0	3	17	0	4	0	0	7	16	18	0	25	0	0	10	0	44	0	16	0	24	1	13	0	7	0	0	20	0	0	0	0	21	29	12	8	0	0
GW554060	UNC10225185A	6-aminopurines and related	Nc1n[nH]c2nnc(-c3ccccc3)c(-c3ccccc3)c12	3	4	5	0	0	0	9	21	0	0	0	0	27	36	0	16	0	35	0	14	0	9	0	4	0	35	13	0	22	35	0	41	0	22	2	8	10	0	2	60	3	5	0	4	0	0
SB-642057	UNC10225186A	3-amino-5-aryl-pyrazolopyridine	CCCC(=O)Nc1n[nH]c2ncc(cc12)-c1cccc2ccccc12	2	3	4	27	0	27	11	26	0	0	9	59	5	5	0	39	0	29	37	19	7	6	9	9	6	24	16	18	28	0	12	5	0	0	0	0	0	0	0	35	0	7	14	11	0	0
GW622475	UNC10225188A	4-pyrimidinyl_ortho-aryl_azoles	CN1CCN(CCCNc2nccc(n2)-c2c(nn3cc(ccc23)C(N)=O)-c2ccc(F)cc2)CC1	21	25	28	33	10	0	17	90.6	94.9	19	45	77	96.7	100	0	12	0	26	18	11	29	19	0	0	20	5	10	17	26	56	0	37	0	20	49	6	9	29	0	25	31	0	21	21	0	0
GW551191	UNC10225189A	4-anilinoquinoline	Fc1cc(Cl)ccc1Nc1ccnc2cc(I)ccc12	0	5	7	11	22	26	29	54	0	0	85	5	0	23	0	18	58	29	0	0	5	3	0	0	0	28	41	0	16	38	0	0	8	0	12	19	2	0	0	54	0	5	0	0	0	0
GSK2373693	UNC10225190A	morpholino-triazolo-pyrimidinones	C[C@@H]1CN(CCO1)c1cc(=O)n2nc(C)n(Cc3cccc(Cl)c3Cl)c2n1	5	10	19	1	0	0	14	0	22	14	0	0	15	2	0	7	4	22	0	11	0	0	8	0	35	17	6	4	17	17	35	0	35	15	2	13	3	0	0	28	0	42	9	0	0	0
GW810578	UNC10225191A	4-pyrimidinyl-azoles	FC(F)(F)c1cc(Br)cc(Nc2nccc(n2)-c2cnn3ncccc23)c1	23	27	34	32	0	0	0	15	6	13	2	25	10	27	6	6	20	0	24	16	27	40	0	25	9	16	16	3	29	0	8	7	0	10	0	0	0	0	0	16	23	29	5	18	0	6
GW829351	UNC10225192A	4-pyrimidinyl_ortho-aryl_azoles	FC(F)(F)c1cc(Nc2nccc(n2)-c2c(nn3ncccc23)-c2ccc(Cl)cc2)ccc1Cl	0	1	3	4	42	0	0	0	0	0	12	0	0	27	0	0	0	8	0	0	0	0	0	0	5	0	0	0	0	0	0	0	4	0	0	0	0	0	0	19	0	0	0	0	30	27
GSK1379899	UNC10225193A	2-anilino-4-aminopyrimidine	COc1ccc(Nc2nccc(NCCNC(=O)Nc3cc(C)ccc3C)n2)cc1	0	3	4	0	0	0	5	2	0	2	6	0	0	0	0	0	0	1	0	0	0	0	0	0	0	14	36	4	28	36	0	0	0	0	4	0	4	7	0	0	3	4	0	0	0	0
SB-249175	UNC10225194A	4-pyrimidinyl_ortho-aryl_azoles	CCOc1nccc(n1)-c1c(ncn1C1CCNCC1)-c1ccc(F)cc1	13	18	20	11	35	2	0	11	100	9	0	1	13	8	0	0	16	52	1	5	0	7	0	0	52	59	15	54	0	0	100	20	26	12	5	0	0	11	34	27	0	31	0	1	0	0
GSK2306394	UNC10225195A	morpholino-imidazo-pyrimidinones	Cc1c(Cn2c3ccccc3n3c2nc(cc3=O)N2CCOCC2)cccc1C(F)(F)F	6	6	7	0	0	0	11	10	0	6	0	9	0	0	0	19	0	2	0	0	0	8	0	8	0	9	14	5	7	34	0	0	0	0	8	3	0	0	0	3	5	13	20	0	0	0
GSK1325775	UNC10225196A	4-aryl-7-azaindole	OC(=O)C(F)(F)F.OC(=O)C(F)(F)F.NCC(NC(=O)c1cc(-c2cn[nH]c2)c(s1)-c1ccnc2[nH]ccc12)c1ccccc1	38	56	75	86	1	0	0	52	0	15	0	0	52	58	66	23	83	38	17	24	0	52	11	23	95.6	83	82	45	99.7	0	0	80	4	0	0	0	30	21	0	94.6	41	49	50	33	0	12
GW767488	UNC10225197A	4-pyrimidinyl-azoles	CN(C)CC(O)COc1ccc(Nc2nccc(n2)-c2cnn3nc(ccc23)N2CCOCC2)cc1	49	65	78	88	48	29	42	72	37	18	0	0	13	26	0	0	1	35	4	0	33	25	9	44	65	84	70	28	93.6	0	18	58	42	3	3	0	3	33	22	76	31	49	37	38	25	25
SB-731579	UNC10225198A	3-amino-6-aryl-pyrazolopyridine	CCN1CCN(CCCC(=O)Nc2n[nH]c3nc(c(Br)cc23)-c2ccc(O)cc2)CC1	12	19	27	0	64	31	100	78	0	0	2	63	0	16	0	0	0	0	0	0	0	5	0	49	0	5	0	57	9	0	0	15	12	0	81	0	50	54	0	5	0	65	17	0	0	0
GSK1379878	UNC10225199A	2-anilino-4-aminopyrimidine	Cc1ccc(C)c(NC(=O)NCCNc2ccnc(Nc3ccc(F)cc3)n2)c1	4	4	4	63	0	0	0	0	0	0	0	0	0	10	0	0	0	2	10	0	5	0	0	0	7	0	15	0	20	33	0	0	0	0	0	1	0	0	0	14	5	28	2	62	0	0
GSK1398474	UNC10225200A	Biphenylamide	COc1cccc(NC(=O)Nc2ccc(C)c(c2)-c2ccc(cc2)C(=O)Nc2ccncc2)c1	11	13	15	0	4	0	21	0	0	0	12	0	30	12	0	16	0	23	0	13	10	20	2	0	14	0	40	25	26	40	0	0	0	18	30	0	12	96.2	0	0	21	0	25	0	0	2
GW548057	UNC10225201A	4-pyridinyl_ortho-aryl_azoles	Nc1nc(c(s1)-c1ccnc2ccccc12)-c1ccccn1	0	4	7	1	28	26	14	18	59	0	56	0	9	44	0	0	0	17	14	1	20	24	2	0	17	0	25	8	33	9	0	35	32	9	0	1	0	0	8	39	4	33	8	0	1	0
GSK2297542	UNC10225202A	morpholino-imidazo-pyrimidinones	Cc1cccc(Cn2ccn3c2nc(cc3=O)N2CCOCC2)c1	2	2	3	15	7	0	13	0	0	0	4	6	27	44	0	4	0	36	1	12	19	12	0	6	15	0	18	5	15	57	0	0	0	27	4	22	0	6	0	34	71	19	70	9	0	0
AH2635	UNC10225203A	6-aminopurines and related	Nc1ncnc2n(cnc12)-c1ccc(Cl)cc1	0	2	2	0	0	0	0	3	0	0	16	0	24	33	0	0	0	0	0	0	0	0	0	0	0	0	17	0	28	24	0	0	2	20	0	0	0	9	0	25	5	3	4	0	0	0
SB-735216	UNC10225204A	Imidazolopyridine	CCn1c(nc2cnccc12)-c1ccncc1	3	3	3	0	26	0	0	40	14	0	4	0	15	6	0	0	0	6	0	5	21	8	0	20	7	29	0	24	8	0	4	0	24	17	19	3	0	0	28	15	0	45	6	0	0	0
GSK1645895	UNC10225205A	4-pyrimidinyl_ortho-aryl_azoles	CCc1nc(c(s1)-c1ccnc(Nc2ccc(nc2)N2CCN(CC2)C(C)=O)n1)-c1cccc(c1)N(C)S(=O)(=O)c1ccccc1	3	6	7	26	28	7	23	0	0	0	0	0	16	19	0	0	0	18	0	0	26	16	12	0	19	10	0	0	0	64	0	0	0	15	60	31	0	0	0	0	45	27	29	16	0	0
SB-477794	UNC10225206A	4-pyridinyl_ortho-aryl_azoles	OC(=O)C(F)(F)F.CC(C)(CN)c1nc(c([nH]1)-c1ccncc1)-c1ccc(Cl)c(O)c1	50	67	73	0	96.1	99.4	92.4	96.5	87	1	91.9	61	7	54	5	21	34	34	0	15	0	19	19	1	8	31	0	5	0	98.2	37	99.9	32	0	97.8	99.7	0	0	43	100	19	24	10	0	0	0
SB-477794	UNC10225206B	4-pyridinyl_ortho-aryl_azoles	OC(=O)C(F)(F)F.CC(C)(CN)c1nc(c([nH]1)-c1ccncc1)-c1ccc(Cl)c(O)c1	49	67	76	0	94.7	98.9	89	93.4	91.7	25	91	67	17	35	25	8	100	16	0	13	1	0	0	3	0	15	30	13	21	98	47	99.9	33	40	98.5	99.6	20	22	71	98.2	13	3	9	0	0	0
SB-202620	UNC10225208A	4-pyridinyl_ortho-aryl_azoles	OC(=O)c1ccc(cc1)-c1nc(c([nH]1)-c1ccncc1)-c1ccc(F)cc1	8	11	17	3	56	49	1	7	71	0	43	29	0	6	3	11	8	0	23	12	0	46	23	0	40	32	0	19	0	36	15	33	21	0	89	0	0	17	0	11	9	0	2	29	0	13
SB-517389	UNC10225209A	3-amino-5-aryl-pyrazolopyridine	Nc1n[nH]c2nnc(cc12)-c1ccccc1	2	5	11	16	11	5	13	16	0	0	4	0	6	16	0	13	0	29	0	16	0	1	61	0	13	32	0	0	0	0	4	0	0	0	0	20	0	0	0	0	15	38	28	0	0	0
GSK1379880	UNC10225210A	2-anilino-4-aminopyrimidine	Fc1ccc(Nc2nccc(NCCNC(=O)Nc3ccccc3F)n2)cc1	1	1	1	0	0	0	24	0	0	0	0	0	0	19	0	0	0	25	0	0	0	21	1	0	11	32	6	0	0	6	0	0	0	0	0	6	0	0	0	31	0	0	0	0	0	0
SB-747651	UNC10225211A	aminofurazan	Cl.CCn1c(nc2cncc(CNC3CCNCC3)c12)-c1nonc1N	5	11	17	39	5	5	13	8	0	0	0	0	1	11	72	51	66	63	6	0	22	9	9	8	6	23	0	100	0	8	0	0	17	0	10	0	4	0	14	48	19	30	22	0	0	0
SB-404321	UNC10225212A	3-anilino-4-aryl maleimide	CN1C(=O)C(Nc2cc(Cl)c(O)c(Cl)c2)=C(C1=O)c1ccc(Cl)cc1	3	4	4	0	30	0	0	0	0	0	0	0	3	16	0	0	0	48	0	0	0	0	0	0	0	14	0	27	0	0	0	0	1	13	0	0	0	0	0	12	0	25	0	0	0	0
SB-282852	UNC10225213A	4-pyrimidinyl_ortho-aryl_azoles	COc1nccc(n1)-c1c(ncn1CCCN1CCOCC1)-c1ccc(F)cc1	1	2	5	0	55	41	49	0	0	0	0	0	0	18	0	3	3	25	77	0	0	0	0	0	23	42	0	0	0	0	0	0	25	0	20	0	0	0	33	0	0	29	0	0	0	0
GSK2225749	UNC10225214A	3-Amino-6-aryl-indazole	Nc1n[nH]c2cc(ccc12)-c1cc(Nc2ccccc2)nc(N)n1	5	11	18	74	58	0	0	0	81	1	4	0	21	7	0	0	0	7	16	0	40	0	0	0	0	19	47	0	98.9	0	0	0	4	12	0	0	0	20	6	90	3	29	11	0	0	0
GW407034	UNC10225215A	4-anilinoquinoline	N(c1ccc(Oc2ccccc2)cc1)c1ccnc2ccc(cc12)-c1ccccn1	7	14	16	13	0	0	17	5	0	6	13	0	12	19	0	17	0	28	10	0	0	26	4	11	6	19	4	0	8	90.2	11	0	26	44	13	81	12	0	61	12	1	5	0	5	0	0
SB-317658	UNC10225216A	3-anilino-4-aryl maleimide	CSc1ccc(NC2=C(C(=O)NC2=O)c2ccc(Cl)cc2)cc1	0	0	0	0	0	0	0	0	13	15	0	23	1	0	9	8	10	0	23	30	3	0	0	25	32	9	2	10	0	0	6	0	0	11	0	1	0	0	0	0	19	61	13	0	4	0
GSK1660450	UNC10225217A	5-Ar-indazole	Cc1n[nH]c2cnc(cc12)-c1cc(OC[C@@H](N)Cc2c[nH]c3ccccc23)c(N)nc1-c1ccoc1C	71	86	110	68	16	52	51	0	0	0	0	0	16	21	97.4	99.5	89	3	0	0	0	20	0	26	0	0	51	0	74	23	0	0	0	8	30	3	24	7	0	49	23	35	96.2	44	46	47
GSK1379720	UNC10225218A	2-anilino-4-pyrrolidinopyrimidine	Cc1ccc(C)c(NC(=O)NC2CCN(C2)c2ccnc(Nc3ccc(F)cc3)n2)c1	0	0	1	6	0	0	7	14	0	0	0	0	0	48	0	19	0	28	7	0	0	0	0	0	0	48	76	0	23	24	0	0	21	0	0	21	0	0	0	49	2	0	6	11	0	0
GW560116	UNC10225220A	4-anilinoquinoline	Fc1cc(Cl)ccc1Nc1ccnc2cc(ccc12)-c1ccc(CN2CCCCC2)o1	7	9	10	1	47	49	14	5	0	0	52	0	0	38	0	0	0	4	0	0	0	0	0	0	95.7	0	0	0	0	55	0	0	0	0	0	14	2	0	0	26	3	0	8	0	0	0
SB-284852	UNC10225221A	4-pyrimidinyl_ortho-aryl_azoles	OC(=O)C(F)(F)F.OC(=O)C(F)(F)F.OC(=O)C(F)(F)F.Cc1ccc(C)c(Oc2nccc(n2)-c2c(ncn2C2CCNCC2)-c2ccc(F)cc2)c1	14	18	17	0	53	14	13	0	20	100	14	25	17	19	22	0	7	0	19	3	0	0	1	0	0	8	47	0	17	1	0	9	0	0	0	13	0	3	0	0	0	0	18	0	0	7
GSK1653537	UNC10225222A	2-anilino-4-piperidinopyrimidine	OC(=O)C(F)(F)F.Cc1cc(nc(Nc2cccc(c2)C#N)n1)N1CCC(CC1)NS(=O)(=O)c1ccc(F)cc1	1	1	2	9	0	0	2	0	0	0	0	0	0	0	0	20	0	7	0	20	3	15	0	3	0	0	18	7	21	25	0	0	0	14	0	21	7	0	0	0	16	0	8	0	0	0
GW680903	UNC10225223A	2-aminobenzimidazole	COC(=O)Nc1nc2ccc(Oc3ccc(CC(=O)Nc4cc(ccc4F)C(F)(F)F)cc3)cc2[nH]1	14	16	18	4	35	0	34	9	0	0	0	0	19	42	0	0	0	36	0	0	1	7	3	0	0	60	52	23	3	32	6	0	1	16	45	20	1	0	0	63	2	30	0	0	0	0
GW819776	UNC10225224A	4-pyrimidinyl-azoles	Cc1ccc2c(cnn2n1)-c1ccnc(Nc2ccc(cc2)C(F)(F)F)n1	3	8	17	12	36	28	1	0	11	0	0	0	5	35	0	0	0	0	11	8	0	0	0	0	11	32	4	0	12	0	13	0	32	0	0	4	0	14	0	6	0	0	0	0	0	0
GSK2328680	UNC10225225A	morpholino-imidazo-pyrimidinones	Cc1c(C)n2c(nc(cc2=O)N2CCOCC2)n1Cc1cccc(c1C)C(F)(F)F	4	5	6	0	0	0	11	0	20	0	0	0	2	14	0	0	0	3	0	2	0	0	2	0	0	0	0	0	2	29	6	0	5	14	0	6	0	0	0	2	7	0	5	2	0	0
GW835314	UNC10225226A	4-pyridinyl (with 2 aryl) _ortho-aryl_azoles	CN(C)CCOc1ccc(cc1)-c1cc(ccn1)-c1c[nH]nc1-c1ccccn1	10	21	28	15	91.5	88	34	45	95.6	25	53	13	36	0	9	0	0	5	34	0	14	0	5	24	0	5	12	49	4	14	13	74	69	32	16	9	24	26	0	0	12	0	10	7	0	0
SB-284851	UNC10225227A	4-pyrimidinyl_ortho-aryl_azoles	OC(=O)C(F)(F)F.OC(=O)C(F)(F)F.OC(=O)C(F)(F)F.Cc1cc(C)cc(Oc2nccc(n2)-c2c(ncn2C2CCNCC2)-c2ccc(F)cc2)c1	4	8	11	13	45	35	1	0	0	0	14	0	20	0	15	0	0	19	0	5	0	53	1	0	0	14	8	0	15	9	0	0	0	0	0	0	0	7	0	0	0	0	0	0	0	0
GSK1398473	UNC10225228A	Biphenylamide	Cc1ccc(C)c(NC(=O)Nc2ccc(C)c(c2)-c2ccc(cc2)C(=O)Nc2ccncc2)c1	7	13	15	11	0	0	14	18	0	0	3	0	14	25	0	0	0	38	15	0	0	17	0	0	0	21	22	90	13	0	0	0	0	0	62	25	0	0	0	4	8	27	13	0	0	0
GW868318	UNC10225229A	Biphenylamide	COCCNC(=O)c1ccc(cc1)-c1cc(cc(F)c1C)C(=O)NC1CC1	2	2	0	0	43	28	12	7	17	12	0	9	14	0	0	15	26	51	20	0	11	0	5	26	27	33	0	0	7	0	19	19	46	7	10	0	0	18	0	51	14	5	10	0	7	10
GW792479	UNC10225230A	4-pyridinyl (with 2 aryl) _ortho-aryl_azoles	O=C(N1CCCC1)c1ccc(cc1)-c1cc(ccn1)-c1c[nH]nc1-c1ccccn1	4	5	8	12	74	59	0	0	77	11	22	0	27	0	2	0	0	16	0	12	0	0	4	0	0	11	0	0	18	9	0	9	0	12	0	0	0	2	24	20	32	0	30	0	1	5
GSK2297428	UNC10225231A	morpholino-imidazo-pyrimidinones	Fc1ccccc1Cn1ccn2c1nc(cc2=O)N1CCOCC1	4	4	6	5	0	0	8	0	0	0	0	0	13	8	0	0	0	0	0	0	9	0	0	0	0	13	0	0	0	21	0	0	0	13	0	36	0	100	0	0	15	0	16	5	0	0
GSK198271	UNC10225232A	4-pyrimidinyl_ortho-aryl_azoles	Fc1cccc(F)c1C(=O)Nc1cccc(c1)-c1nn2ncccc2c1-c1ccnc(Nc2ccccc2)n1	41	50	54	17	60	6	42	21	0	0	25	0	3	31	0	16	0	38	12	15	69	38	0	6	65	32	64	100	16	97.5	0	0	0	89	90.9	94.5	4	0	99.4	32	39	9	25	11	0	0
GW440135	UNC10225233A	4-anilinoquinoline	Cl.COc1cc2nccc(Nc3ccc(OCc4ccc(NC(C)=O)cc4)cc3)c2cc1OC	8	9	12	0	17	0	4	25	0	0	1	4	15	23	6	0	0	5	15	10	0	28	3	0	0	0	0	13	0	26	24	0	8	26	6	36	0	0	0	46	5	31	8	0	0	0
GSK907232	UNC10225234A	benzimidazole_N-thiophenes	C[C@@H](Oc1cc(sc1C(N)=O)-n1cnc2cc(ccc12)-c1ccnc(NCCS(C)(=O)=O)c1)c1ccccc1Cl	18	28	40	73	0	0	30	10	0	0	3	0	25	10	0	16	0	18	0	0	0	84	0	7	0	27	65	91	97.7	30	21	0	0	23	0	20	55	78	0	31	15	31	15	13	0	0
GSK1379724	UNC10225235A	2-anilino-4-pyrrolidinopyrimidine	Fc1ccc(Nc2nccc(n2)N2CCC(C2)NC(=O)Nc2ccc3OCOc3c2)cc1	2	2	2	12	0	0	9	0	0	0	0	0	6	36	0	0	0	29	10	0	0	8	3	0	0	99.4	52	5	27	19	0	0	18	5	1	16	0	0	0	24	35	16	30	23	0	0
GW813244	UNC10225236A	2,4-dianilinopyrimidine	Cl.CN(c1ccc2n(C)c(NCc3ccc(F)cc3)nc2c1)c1ccnc(Nc2ccc(CS(C)(=O)=O)cc2)n1	23	25	36	30	97.2	79	75	17	3	0	0	0	0	21	8	0	1	0	11	5	0	4	37	0	77	70	67	68	33	57	16	0	10	16	96.8	88	0	0	0	50	0	0	0	22	0	0
GSK190937	UNC10225238A	3-vinyl pyridines	Cl.Cc1cnc(N)c(\C=C\c2cncc(c2)C(=O)NCCc2ccc(Cl)cc2Cl)c1	4	5	8	19	39	0	11	0	0	0	0	0	25	13	0	0	0	0	3	18	3	1	2	0	1	32	12	5	23	3	0	0	0	19	1	7	0	0	1	9	12	0	10	7	0	0
GW867587	UNC10225239A	2-aryl-4-anilino(pyridin-4-yl)-quinazoline and analogues	Cc1cccc(n1)-c1nc(Nc2ccc3[nH]nnc3c2)c2ccccc2n1	2	2	4	0	78	47	0	0	0	0	0	0	0	8	5	0	0	2	0	0	0	0	0	0	0	0	0	0	0	3	0	0	8	0	0	0	0	0	0	13	0	0	0	0	0	8
GSK1379714	UNC10225240A	2-anilino-4-pyrrolidinopyrimidine	COC(=O)C(Cc1ccccc1)NC(=O)NC1CCN(C1)c1ccnc(Nc2ccc(F)cc2)n1	3	5	7	0	0	0	0	6	0	0	6	0	21	36	0	0	0	0	7	0	0	0	5	0	43	11	35	3	17	10	0	0	22	29	0	12	0	0	30	32	2	34	4	9	0	0
GW599550	UNC10225241A	4-pyridinyl (with 2 aryl) _ortho-aryl_azoles	FC(F)(F)c1ccc(cc1)-c1cc(ccn1)-c1c[nH]nc1-c1ccccn1	4	5	9	24	17	21	16	16	46	0	34	0	9	37	0	0	0	24	4	16	20	0	5	0	18	17	14	20	13	39	0	0	25	19	0	8	0	0	0	55	23	35	22	1	0	0
SB-300079	UNC10225242A	3-anilino-4-aryl maleimide	CN1C(=O)C(Nc2ccccc2)=C(C1=O)c1ccccc1	1	1	2	0	0	6	0	0	8	0	0	0	0	25	0	0	0	7	0	1	15	0	0	0	0	21	0	0	0	23	12	0	14	0	9	0	0	0	0	32	0	0	0	0	0	0
GW680061	UNC10225243A	4-pyridinyl (with 2 aryl) _ortho-aryl_azoles	Cc1ccccc1-c1cc(ccn1)-c1c[nH]nc1-c1ccccn1	1	3	3	0	0	0	17	9	0	0	0	0	1	12	0	3	0	22	1	0	0	0	0	14	0	4	6	0	2	32	0	0	7	1	6	18	0	0	3	35	9	0	16	0	0	0
SB-390765	UNC10225244A	3-anilino-4-aryl maleimide	COc1ccc(cc1)C1=C(Nc2cccc(c2)C(O)=O)C(=O)NC1=O	2	2	2	4	35	0	1	100	7	0	0	1	0	0	1	0	14	2	23	2	6	5	9	21	18	26	0	19	18	0	13	4	0	17	9	0	0	0	0	0	23	44	18	0	5	0
GSK1653539	UNC10225245A	2-anilino-4-piperidinopyrimidine	OC(=O)C(F)(F)F.COc1ccc(cc1)S(=O)(=O)NC1CCN(CC1)c1cc(C)nc(Nc2cccc(c2)C#N)n1	1	1	1	0	0	0	1	0	0	0	0	0	20	35	0	0	0	5	0	0	14	8	0	0	2	7	0	0	5	25	0	0	0	3	0	0	0	0	0	0	0	1	17	0	0	0
GW684374	UNC10225247A	4-pyrimidinyl-azoles	CCCCc1nn2ncccc2c1-c1ccnc(NC2CC2)n1	4	6	8	14	0	0	0	2	0	0	0	0	61	38	0	0	0	17	0	0	8	12	0	0	30	12	38	0	23	0	0	0	0	4	7	0	0	0	0	91.3	9	12	5	9	0	0
GW493036	UNC10225248A	4-pyridinyl-azole	CC(=O)c1c(C)c([nH]c1-c1ccncc1)-c1ccncc1	14	25	29	14	0	0	7	7	0	0	17	0	4	46	0	1	28	31	13	0	3	3	17	0	0	16	5	17	23	38	0	0	24	0	19	3	0	0	7	84	26	0	20	0	0	0
GW514784	UNC10225249A	4-pyridinyl_ortho-aryl_azoles	Fc1ccc(cc1)-c1nn2c(OCC(F)(F)F)cccc2c1-c1ccncc1	10	13	14	0	0	0	5	13	61	0	0	0	18	46	0	0	0	0	0	0	25	0	0	0	0	0	0	0	11	43	0	0	1	2	44	1	0	0	31	99	0	0	7	0	0	0
GSK301329	UNC10225250A	4-anilino-quinazoline and analogues	COc1cc2c(Nc3ccc(NC(=O)c4ccccc4)cc3)ncnc2cc1OCCCN1CCOCC1	6	13	19	0	16	0	20	0	0	0	0	0	10	0	0	0	0	9	0	0	17	28	0	20	94.5	95.6	70	55	28	96.7	0	0	0	7	0	77	20	0	0	10	40	9	35	9	0	0
GW776245	UNC10225251A	4-pyridinyl (with 2 aryl) _ortho-aryl_azoles	Cl.C(N1CCOCC1)c1ccc(cc1)-c1cc(ccn1)-c1c[nH]nc1-c1ccccn1	1	2	3	25	62	61	0	7	80	11	9	0	34	0	17	0	0	0	0	14	0	0	1	0	0	6	8	0	20	9	0	52	0	13	16	0	0	21	0	0	22	0	27	0	2	5
SB-405367	UNC10225252A	3-anilino-4-aryl maleimide	Oc1ccc(NC2=C(C(=O)NC2=O)c2ccc(Cl)cc2)cc1Cl	0	1	4	27	34	15	0	0	0	24	0	75	10	5	4	0	6	6	3	4	6	0	0	0	15	1	0	29	0	0	12	0	11	0	0	4	7	0	0	0	11	0	5	29	8	0
GSK1379716	UNC10225253A	2-anilino-4-pyrrolidinopyrimidine	Fc1ccc(Nc2nccc(n2)N2CCC(C2)NC(=O)c2cc3ccccc3s2)cc1	0	0	0	7	0	0	21	0	0	0	5	11	24	61	0	16	0	3	7	20	0	21	14	9	4	24	53	19	26	62	0	0	0	22	0	25	18	9	0	64	26	9	17	0	0	0
GSK2603346	UNC10225254A	7-alkyl-5-aryl-4-aminopyrrolopyrimidine	Cc1ccccc1CC(=O)N1CCc2cc(ccc12)-c1cn(C)c2ncnc(N)c12	13	26	30	3	50	25	29	0	0	0	65	11	3	3	0	4	0	20	18	23	0	42	30	6	27	92	100	98.7	82	49	0	0	0	2	0	71	0	0	0	10	16	0	13	19	0	0
SB-373598	UNC10225255A	3-anilino-4-aryl maleimide	Clc1ccccc1C1=C(N2CCc3ccccc23)C(=O)NC1=O	8	9	10	7	12	97.7	15	27	35	25	33	13	17	16	0	19	25	4	17	22	18	10	7	13	0	10	3	0	18	7	0	8	100	29	1	24	12	9	0	16	67	41	65	0	20	0
SB-710397	UNC10225256A	4-pyridinyl_ortho-aryl_azoles	Cl.Cl.CN(C)CCN(C)C(=O)c1cc(c(o1)-c1ccc(Cl)c(O)c1)-c1ccncc1	4	7	11	6	2	6	17	0	0	0	9	0	11	45	0	0	0	29	0	0	0	0	18	0	0	9	0	8	13	12	0	0	31	0	94.5	29	2	0	10	95.2	10	6	13	0	0	0
GSK2188764	UNC10225257A	fused carboxamide pyrimidine	OC(=O)C(F)(F)F.Clc1cc(Cl)cc(Nc2nc(N[C@@H]3CCNC3)nc3cc[nH]c(=O)c23)c1	84	120	147	89	9	11	0	0	0	0	0	0	25	14	0	0	0	90.5	87	90	97.1	99.5	0	4	97.3	75	69	92.1	97.6	0	0	0	70	27	0	5	19	8	0	99.2	84	100	97.9	72	71	37
SB-223132	UNC10225258A	4-pyrimidinyl_ortho-aryl_azoles	CC(C)N1CCC(CC1)n1cnc(c1-c1ccnc(N)n1)-c1ccc(F)cc1	5	5	4	9	50	19	0	0	0	22	25	0	31	0	3	0	0	12	0	11	0	0	1	0	0	0	51	5	32	2	10	0	0	9	0	5	0	0	13	15	0	0	0	0	4	0
SB-708998	UNC10225259A	3-amino-6-aryl-pyrazolopyridine	Brc1cc2c(NC(=O)C3CC3)n[nH]c2nc1-c1ccccc1	6	6	6	8	43	11	2	21	0	24	7	21	4	1	7	4	0	1	12	18	14	0	0	0	7	4	36	0	28	8	16	0	0	7	31	0	60	32	0	11	4	26	4	0	0	0
GSK1024306	UNC10225260A	benzimidazole_N-thiophenes	NC(=O)c1sc(cc1OCc1ccccc1F)-n1cnc2ccccc12	4	8	9	45	0	0	8	0	0	0	2	0	5	7	0	0	0	5	6	0	0	31	0	0	0	0	38	0	60	0	0	0	27	6	0	14	5	0	0	20	0	31	0	0	0	0
GI261590	UNC10225261A	4-anilino-quinazoline and analogues	Cl.COc1cc2ncnc(Nc3ccc(OCc4ccccc4Br)c(Cl)c3)c2cc1OC	8	10	10	15	0	0	16	0	0	0	4	0	22	37	0	5	0	39	11	0	0	3	10	0	1	35	42	19	5	49	0	0	15	4	7	66	0	37	0	66	12	21	0	0	0	0
GSK479719	UNC10225262A	benzimidazole_N-thiophenes	C[C@@H](Oc1cc(sc1C(N)=O)-n1cnc2cc(ccc12)-c1ccncc1)c1ccccc1Cl	21	28	34	61	0	25	22	10	0	0	0	0	12	9	0	6	0	31	5	17	0	75	4	8	0	48	100	89	98.6	0	0	0	0	18	1	15	58	79	0	23	4	18	6	0	0	0
GSK1398463	UNC10225263A	Biphenylamide	Cc1ccc(NC(=O)c2cccc(c2)C#N)cc1-c1ccc(cc1)C(=O)Nc1ccncc1	6	9	10	73	50	10	54	18	0	0	0	2	18	6	0	0	0	31	0	15	0	33	3	8	7	12	6	11	24	31	0	0	0	26	29	14	15	0	0	27	49	0	42	67	7	6
SB-708999	UNC10225264A	3-amino-6-aryl-pyrazolopyridine	O=C(Nc1n[nH]c2nc(ccc12)-c1ccccc1)C1CC1	5	9	15	100	62	41	16	6	22	9	37	0	2	12	14	9	0	3	17	12	63	8	18	32	22	15	8	0	40	0	0	6	10	9	4	0	54	37	40	0	3	35	0	79	0	0
GSK1287544	UNC10225265A	4-aryl-7-azaindole	OC(=O)C(F)(F)F.OC(=O)C(F)(F)F.NCCCC(NC(=O)c1cc(Br)c(s1)-c1ccnc2[nH]ccc12)c1ccccc1	27	42	52	55	0	0	23	0	0	0	0	0	20	38	89	52	91.8	32	17	35	0	54	0	0	74	56	95.7	74	97.9	0	0	0	21	7	0	3	28	0	0	21	13	10	18	0	0	0
SB-390767	UNC10225267A	3-anilino-4-aryl maleimide	COc1cccc(c1)C1=C(Nc2cc(Cl)c(O)c(Cl)c2)C(=O)NC1=O	10	10	10	0	0	4	19	20	0	0	2	19	1	0	0	0	0	29	8	0	0	26	4	7	0	0	8	0	21	0	0	0	1	13	0	18	7	0	0	2	4	0	16	0	0	0
GW659008	UNC10225268A	2,4-dianilinopyrimidine	Cl.NC(=O)c1cccc(Nc2nccc(Nc3ccc(Oc4cccc(Cl)c4)c(Cl)c3)n2)c1	3	8	12	14	0	0	20	29	0	0	14	0	5	32	0	8	0	24	42	33	0	0	0	0	6	49	21	12	33	84	0	0	3	14	0	69	0	0	0	36	25	0	17	9	0	0
GSK2177277	UNC10225269A	fused carboxamide pyrimidine	OC(=O)C(F)(F)F.OC(=O)C(F)(F)F.O=c1[nH]ccc2nc(N[C@@H]3CCCNC3)nc(Nc3ccc(cc3)S(=O)(=O)N3CCOCC3)c12	199	234	260	91.6	47	84	46	91.1	2	29	53	9	0	0	0	0	0	97.4	97.6	98.1	98.1	100	0	19	96.8	97.6	100	99.9	100	95.6	0	90.8	98.6	58	0	9	69	69	90.7	90.5	88	100	99.1	74	100	99.9
GW800172	UNC10225270A	Biphenylamide	Cc1ccc(cc1-c1ccc(cc1)C(=O)NCC1CC1)C(=O)NC1CCCC1	2	2	3	3	0	16	6	10	15	29	1	3	0	4	25	0	11	36	2	100	19	0	21	16	31	28	0	0	0	0	19	0	30	6	34	8	0	0	65	35	0	28	5	1	0	14
GSK223810	UNC10225271A	4-anilino-quinazoline and analogues	COc1cc2c(Nc3cccc(NC(=O)c4ccccc4)c3)ncnc2cc1OCCCN1CCOCC1	6	12	11	45	41	0	21	5	7	0	0	0	30	12	0	19	0	21	18	12	16	0	0	3	25	23	51	42	42	58	9	0	0	33	34	18	0	10	0	31	32	37	18	0	0	0
GW635815	UNC10225273A	1-substituted-2-aminobenzimidazole	CC(C)S(=O)(=O)N1CCN(Cc2ccc3n(C[C@H](O)c4ccccc4)c(NC(=O)c4ccsc4)nc3c2)CC1	19	26	36	38	0	2	22	0	15	0	0	0	0	27	0	16	0	68	0	2	19	60	17	0	8	0	37	97.7	57	65	15	0	50	10	0	8	0	0	0	13	25	0	12	19	0	0
SB-222903	UNC10225274A	4-pyrimidinyl_ortho-aryl_azoles	CNc1nccc(n1)-c1c(ncn1C1CCN(C)CC1)-c1ccc(F)cc1	4	7	8	0	34	6	0	0	0	0	0	0	0	22	0	2	0	0	0	16	0	4	0	0	6	0	0	0	0	36	0	0	11	0	0	0	0	0	0	75	0	0	0	0	0	0
SB-333613	UNC10225275A	3-anilino-4-aryl maleimide	Oc1cccc(NC2=C(C(=O)NC2=O)c2ccc(Cl)cc2)c1	0	0	2	27	0	3	0	0	10	19	10	0	0	19	12	0	0	50	8	13	25	2	0	23	30	35	10	12	0	0	6	8	31	2	34	9	0	9	76	48	2	31	4	14	6	19
GSK1581427	UNC10225276A	4-aryl-7-azaindole	Cl.Cl.NC[C@H](CC1CCCCC1)NC(=O)c1cc(Br)c(s1)-c1ccnc2[nH]ccc12	32	53	67	76	0	11	22	25	0	0	0	0	9	91.7	91.8	93.4	95.9	46	55	20	0	58	0	17	63	62	95	86	100	0	0	0	8	0	0	9	0	0	0	13	13	0	11	0	0	0
GW768504	UNC10225277A	2-aminobenzimidazole	Cl.Cl.CN1CCN(CCNc2nc3cc(Oc4ccc(NC(=O)Nc5cc(ccc5F)C(F)(F)F)cc4)ccc3[nH]2)CC1	10	14	15	0	51	23	0	0	0	0	0	0	0	22	4	0	0	0	9	11	0	29	0	0	9	22	13	82	0	14	12	0	0	0	0	0	0	6	0	0	15	0	0	4	0	0
GSK1379732	UNC10225278A	2-anilino-4-pyrrolidinopyrimidine	COc1ccc(Nc2nccc(n2)N2CCC(C2)NC(=O)c2cccc(NC(C)=O)c2)cc1	1	2	2	17	0	0	0	6	0	0	0	2	8	36	0	14	23	0	5	0	11	9	0	1	16	1	1	1	0	40	0	0	9	16	0	0	0	0	36	54	13	9	8	0	0	0
GW582764	UNC10225279B	4-anilino-quinazoline and analogues	Cl.CS(=O)(=O)CCNCc1nc(cs1)-c1ccc2ncnc(Nc3ccc(OCc4ccccc4)c(Cl)c3)c2c1	7	9	9	0	0	0	21	0	0	17	0	0	9	45	0	31	0	35	0	0	0	0	0	0	0	23	0	0	0	48	0	0	15	0	2	3	0	0	35	62	9	4	3	0	0	0
GSK986310	UNC10225280A	carboxamide pyrimidine	Cl.Cc1cccc(Nc2nc(N[C@H]3CCCC[C@H]3N)ncc2C(N)=O)c1	12	26	43	55	0	8	24	5	0	0	11	0	17	29	0	28	0	61	39	29	95.7	40	0	6	0	24	62	59	50	67	12	0	28	13	0	20	16	13	0	89	54	91.4	61	23	0	0
GW681170	UNC10225281A	2-aminobenzimidazole	Cl.Cl.COC(=O)Nc1nc2cc(Oc3ccc(NC(=O)Nc4cc(ccc4F)C(F)(F)F)cn3)ccc2[nH]1	32	38	44	51	99.1	74	82	0	0	0	0	0	2	19	0	0	0	6	19	23	8	0	10	0	78	40	52	98.3	1	31	0	0	10	5	73	0	0	0	0	3	17	28	12	44	0	0
GSK1379788	UNC10225282A	2-anilino-4-piperidinopyrimidine	COc1ccc(CNC(=O)NC2CCN(CC2)c2ccnc(Nc3ccc(F)cc3)n2)cc1	0	0	0	13	0	0	0	0	0	0	0	0	9	49	0	0	0	20	0	0	0	5	0	0	34	26	5	0	0	3	0	0	5	3	0	0	0	0	0	56	10	7	15	0	0	0
GW702865	UNC10225285A	Biphenylamide	Cc1nnc(o1)-c1ccc(C)c(c1)-c1ccc(cc1)C(=O)Nc1ccc(NS(C)(=O)=O)cc1	1	1	0	0	0	0	0	0	0	0	0	0	20	14	0	12	0	6	17	1	14	0	0	0	30	8	3	1	7	14	0	0	9	16	0	3	9	0	40	35	4	10	2	0	0	1
SB-341528	UNC10225286A	3-anilino-4-aryl maleimide	CSc1ccc(NC2=C(C(=O)NC2=O)c2cccc(Cl)c2)cc1	2	2	2	0	11	15	0	0	0	24	0	0	7	7	0	0	15	20	0	0	16	0	42	4	6	0	4	7	7	0	13	0	0	2	0	3	0	16	0	100	15	0	0	6	0	0
GSK346294	UNC10225287A	benzimidazole_N-thiophenes	C[C@@H](Oc1cc(sc1C(N)=O)-n1cnc2ccc(NC(=O)NC(C)(C)C)cc12)c1ccccc1Cl	2	3	3	15	0	0	9	0	0	0	17	1	37	31	0	3	0	0	6	12	8	11	3	0	8	22	34	0	32	0	0	0	5	22	0	17	10	15	6	35	11	32	19	2	9	0
SB-341556	UNC10225288A	3-anilino-4-aryl maleimide	COc1cccc(c1)C1=C(Nc2cccc(Cl)c2)C(=O)NC1=O	6	9	13	0	0	21	8	65	0	0	0	0	24	0	0	0	0	32	0	0	0	0	5	22	0	15	3	12	34	72	0	0	0	24	0	19	11	2	0	23	1	29	36	0	22	0
GW271431	UNC10225289A	4-pyridinyl_ortho-aryl_azoles	c1[nH]nc(c1-c1ccnc2ccccc12)-c1ccccn1	1	1	5	16	14	1	16	46	79	2	75	0	20	24	0	2	0	19	19	11	22	5	0	0	12	20	10	11	24	49	0	13	0	22	0	22	0	0	0	0	23	23	28	13	0	0
GW560106	UNC10225290A	4-anilinoquinoline	Fc1cc(Cl)ccc1Nc1ccnc2cc(ccc12)-c1ccc(CN2CCSCC2)o1	26	35	48	4	95.9	98.7	89	84	21	14	91	49	3	31	0	2	0	28	3	18	14	13	0	0	100	0	18	33	4	97.7	14	45	5	20	2	92.3	0	0	37	38	21	10	11	0	0	0
SB-660566	UNC10225291A	4-pyridinyl_ortho-aryl_azoles	COc1ccc2cc(ccc2c1)-c1nc([nH]c1-c1ccncc1)-c1ccccc1C(C)C	3	4	7	20	0	3	8	17	74	0	0	34	5	17	0	41	0	38	17	0	6	18	16	3	5	30	0	36	0	0	17	0	5	0	6	22	4	10	0	89	7	31	7	0	0	0
SB-733371	UNC10225292A	3-acylamino-6-aryl-indazole	Fc1ccccc1-c1ccc2c(NC(=O)C3CC3)n[nH]c2c1	0	2	4	9	46	21	9	32	1	38	48	0	0	0	0	0	7	0	0	0	10	0	0	0	16	51	46	16	41	0	21	24	0	0	0	0	22	0	0	0	0	0	0	0	2	0
SB-334865	UNC10225293A	3-anilino-4-aryl maleimide	COc1cccc(c1)C1=C(N(C)c2ccccc2)C(=O)NC1=O	1	1	1	0	5	3	14	28	0	0	3	0	4	21	0	13	0	24	6	13	0	1	18	0	11	32	0	0	0	0	0	0	0	0	0	15	0	0	0	53	4	8	12	0	0	0
GSK364507	UNC10225294A	pyrrole-2-carboxamide	COc1ccccc1CNC(=O)c1cc(c[nH]1)C(=O)c1ccccc1C	5	6	5	2	0	0	21	0	0	0	0	0	13	34	0	17	0	21	0	0	0	10	0	2	100	22	11	8	0	17	4	0	7	8	0	12	0	95.2	0	33	9	7	0	0	0	0
GSK2603358	UNC10225297A	7-alkyl-5-aryl-4-aminopyrrolopyrimidine	Cn1cc(-c2ccc3N(CCc3c2)C(=O)Cc2cccc(F)c2)c2c(N)ncnc12	12	17	24	18	58	41	35	0	0	0	69	0	2	35	0	9	0	20	7	22	0	17	11	0	20	95.5	47	83	10	50	0	0	3	0	4	26	14	67	0	52	79	34	74	11	0	0
GSK398099	UNC10225298A	oxindole	NS(=O)(=O)c1cccc(N\C=C2/C(=O)Nc3ccc(cc23)S(=O)(=O)Cc2c(Cl)cccc2Cl)c1	5	6	9	31	0	0	14	0	0	0	0	0	1	18	0	25	0	8	0	0	0	0	3	0	26	30	0	0	0	0	0	0	8	0	0	2	0	0	0	34	27	23	17	26	0	0
SB-390766	UNC10225299A	3-anilino-4-aryl maleimide	COc1ccc(cc1)C1=C(Nc2cccc(O)c2)C(=O)NC1=O	20	27	29	20	0	0	13	0	0	0	0	0	0	9	0	12	0	73	100	10	32	0	35	7	13	33	0	35	0	0	0	0	24	0	6	21	7	49	0	50	23	73	27	26	0	0
SB-733894	UNC10225300A	3-acylamino-6-aryl-indazole	Fc1cccc(-c2ccc3c(NC(=O)C4CC4)n[nH]c3c2)c1F	6	7	10	100	45	40	0	24	21	17	18	29	6	0	0	0	1	0	0	0	0	0	0	5	23	25	54	0	21	0	31	31	52	0	0	0	54	58	0	0	26	0	12	100	19	13
GW560459	UNC10225301A	4-pyridinyl_ortho-aryl_azoles	Nc1nc(c(s1)-c1ccnc2ccccc12)-c1ccccc1F	5	9	12	12	0	0	3	6	0	0	0	0	0	22	0	0	0	31	0	1	16	0	3	0	0	5	17	0	17	39	0	13	2	0	7	0	0	4	0	61	6	0	0	0	0	0
SKF-97620	UNC10225302A	6-aminopurines and related	CCC(CC)(CC)n1cnc2c(N)ncnc12	3	3	3	0	27	6	1	0	10	0	0	0	0	9	11	0	2	0	8	54	17	0	2	26	28	24	0	0	0	0	7	16	53	0	10	0	0	15	0	48	3	18	4	6	0	0
SB-326892	UNC10225303A	3-anilino-4-aryl maleimide	COc1ccc(cc1)C1=C(Nc2cccc(Cl)c2)C(=O)NC1=O	5	8	9	0	10	0	1	0	20	3	20	16	18	18	0	0	17	0	18	0	0	100	4	0	1	0	20	2	24	6	10	0	5	15	0	0	4	22	0	0	0	0	5	0	0	0
SB-601436	UNC10225304A	3-amino-5-aryl-pyrazolopyridine	CCCC(=O)Nc1n[nH]c2ncccc12	0	0	0	0	24	0	0	5	0	0	0	0	0	0	0	0	2	0	0	0	13	0	0	0	0	18	0	18	9	19	0	0	17	28	7	0	0	0	0	0	0	0	3	0	13	0
GW468513	UNC10225305A	4-pyridinyl_ortho-aryl_azoles	COc1cccc2c(c(nn12)-c1ccc(F)cc1)-c1ccncc1	10	17	20	10	0	0	5	31	76	0	3	3	43	38	0	34	5	27	0	18	11	19	0	0	0	0	17	13	26	49	0	0	7	11	38	1	3	0	0	90	0	0	0	1	0	0
GSK1379800	UNC10225306A	2-anilino-4-piperidinopyrimidine	Fc1ccc(Nc2nccc(n2)N2CCC(CC2)NC(=O)Nc2ccccc2F)cc1	0	0	0	17	0	0	12	6	0	0	0	0	1	64	0	11	0	17	14	0	1	0	4	17	15	0	54	15	39	0	8	0	12	3	0	0	0	0	0	63	0	36	5	0	0	0
GSK1229496	UNC10225308A	2-anilino-4-aryl-pyrimidine	COc1ccc(Nc2nccc(n2)-c2ccc(NC(=O)c3cc4cc(F)ccc4[nH]3)cc2)cc1	2	2	2	65	0	0	0	0	23	0	0	0	5	29	0	0	0	17	0	0	0	0	2	0	0	5	0	0	33	0	0	0	21	16	0	16	0	0	0	29	0	26	0	6	0	0
GW684083	UNC10225309A	4-pyridinyl_ortho-aryl_azoles	Nc1nc(c(s1)-c1ccnc2ccccc12)-c1cccnc1	1	4	10	57	0	0	12	32	10	0	0	12	24	45	0	1	0	22	23	20	5	0	0	10	0	7	10	7	34	58	0	55	28	34	0	9	10	0	8	58	8	0	6	0	0	0
GSK1379883	UNC10225311A	2-anilino-4-aminopyrimidine	COC(=O)c1cccc(NC(=O)NCCNc2ccnc(Nc3ccc(F)cc3)n2)c1	0	2	2	3	0	0	1	6	0	0	0	0	15	48	0	0	0	32	0	18	1	0	0	0	21	0	32	5	22	0	0	0	0	21	0	24	0	0	0	10	27	2	21	0	0	0
SB-710903	UNC10225312A	3-amino-6-aryl-pyrazolopyridine	COc1cccc(c1)-c1ccc2c(NC(=O)C3CC3)n[nH]c2n1	5	10	16	12	83	76	24	18	0	0	22	0	3	48	0	0	0	29	0	13	0	0	12	0	0	35	0	0	0	0	0	35	44	0	0	3	8	3	29	82	0	11	0	0	100	100
GSK1379730	UNC10225313A	2-anilino-4-pyrrolidinopyrimidine	COc1ccc(Nc2nccc(n2)N2CCC(C2)NC(=O)c2cccc(c2)C#N)cc1	0	0	0	0	0	0	9	24	4	0	0	0	0	9	0	0	0	28	0	0	0	0	0	0	0	0	22	21	22	38	6	0	0	0	0	8	0	0	28	53	0	13	0	0	0	0
GSK581271	UNC10225314A	2,4-dianilinopyrimidine	Cc1ccc(cc1)S(=O)(=O)Nc1ccc(Nc2nccc(Nc3cccc4[nH]ncc34)n2)cc1	3	8	13	27	11	31	64	32	8	0	57	30	41	87	0	0	0	24	0	0	0	5	0	0	99.8	37	52	0	65	0	0	0	4	5	6	34	5	0	0	44	24	7	8	0	0	0
GSK1323434	UNC10225315A	4-aryl-7-azaindole	Cl.Cl.NCC(NC(=O)c1cc(c(s1)-c1ccnc2[nH]ccc12)-c1cccnc1)c1ccccc1	12	20	35	59	54	37	30	19	0	0	0	0	97.5	71	7	10	86	23	0	0	0	0	0	16	15	19	36	23	63	40	0	51	5	36	21	7	5	0	0	77	32	7	18	3	0	0
GW461487	UNC10225316A	4-pyridinyl_ortho-aryl_azoles	Cl.Cc1cccc2c(c(nn12)-c1ccc(F)cc1)-c1ccncc1	12	16	15	14	0	0	5	9	18	0	11	0	18	28	0	2	0	7	17	0	24	11	1	0	7	0	0	0	3	22	0	0	0	15	14	0	0	0	0	52	0	0	4	20	0	0
SB-738481	UNC10225317A	3-acylamino-6-aryl-indazole	O=C(Nc1n[nH]c2cc(ccc12)-c1ccoc1)C1CC1	4	9	13	45	25	0	0	30	0	19	46	0	0	0	0	0	0	0	0	0	23	0	0	5	23	20	19	37	35	0	11	21	60	16	0	0	11	0	0	0	0	0	0	0	8	0
GSK323521	UNC10225318A	4-pyrimidinyl_ortho-aryl_azoles	COc1cc(Nc2nccc(n2)-c2c(nn3ccccc23)-c2cccc(NC(=O)c3c(F)cccc3F)c2)cc(OC)c1OC	12	15	21	44	52	0	33	0	19	7	15	25	10	0	8	0	5	14	20	23	13	8	5	4	48	90.6	15	80	21	44	0	0	11	7	9	57	8	13	1	3	31	0	21	31	3	0
GW689066	UNC10225319A	4-anilino-quinazoline and analogues	Fc1cccc(COc2ccc(Nc3ncnc4nn5ccccc5c34)cc2Cl)c1	3	4	4	0	0	0	1	0	0	0	0	0	5	42	0	3	0	26	0	0	0	11	8	0	0	0	6	0	15	57	0	0	4	5	0	0	0	0	15	49	19	15	21	0	0	0
SB-211743	UNC10225320A	4-pyridinyl_ortho-aryl_azoles	Fc1ccc(cc1)-c1ncn(CCCN2CCOCC2)c1-c1cccnc1	0	0	0	0	30	34	0	2	0	0	0	6	1	0	0	0	10	0	4	12	0	12	0	0	15	31	5	0	0	16	0	0	16	0	2	0	0	4	0	4	0	0	0	0	0	0
GW461484	UNC10225321A	4-pyridinyl_ortho-aryl_azoles	Cl.Cc1ccc2c(c(nn2c1)-c1ccc(F)cc1)-c1ccncc1	7	10	15	10	0	0	0	16	62	0	18	0	24	17	0	1	17	9	11	1	21	13	0	0	8	0	14	0	19	3	0	0	11	4	59	16	3	4	40	74	0	0	6	1	0	0
GW482059	UNC10225322A	4-anilinoquinoline	CC(C)c1ccc(O)cc1Nc1ccnc2ccc(cc12)C(F)(F)F	0	3	4	0	0	0	3	0	0	43	0	19	0	2	0	0	0	15	20	13	0	0	1	0	0	0	0	14	13	30	0	0	0	0	0	0	1	5	0	13	0	27	0	0	0	0
GSK2221681	UNC10225323A	3-Amino-6-aryl-indazole	CC(C)Nc1cc(nc(N)n1)-c1ccc2c(N)n[nH]c2c1	3	7	12	75	0	0	6	0	14	0	0	0	4	0	0	15	0	19	0	0	19	0	0	0	0	0	40	0	90.7	3	0	0	0	3	0	14	11	17	0	80	24	26	13	10	0	0
GSK292658	UNC10225325A	4-pyrimidinyl_ortho-aryl_azoles	Fc1cccc(F)c1C(=O)Nc1cccc(c1)-c1nn2ccccc2c1-c1ccnc(Nc2cccc(c2)C(F)(F)F)n1	11	15	23	0	11	0	21	0	0	0	0	0	0	0	0	8	2	0	0	13	13	12	2	2	2	0	49	12	0	94	0	0	22	52	43	41	0	0	50	45	4	33	0	0	0	0
SB-732932	UNC10225326A	3-acylamino-6-aryl-indazole	O=C(Nc1n[nH]c2cc(ccc12)-c1ccsc1)C1CC1	4	8	13	56	47	11	18	28	21	26	45	0	0	0	0	21	9	9	7	0	40	0	0	30	13	35	20	43	54	0	27	22	32	15	9	0	59	61	10	20	30	2	0	23	20	11
GW855857	UNC10225327A	2-aryl-4-anilino(pyridin-4-yl)-quinazoline and analogues	Cc1cccc(n1)-c1nc(Nc2ccncc2)c2ccccc2n1	5	6	11	2	39	28	22	15	94.3	24	36	65	27	0	20	0	0	0	0	12	0	0	0	0	0	10	0	7	1	1	0	29	0	6	0	13	0	11	0	0	0	0	3	0	6	0
GW830899	UNC10225328A	2,4-dianilinopyrimidine	Cl.CN(c1ccc(NC(=O)N2CCN(CCCN3CCOCC3)CC2)cc1)c1ccnc(Nc2ccc(CS(C)(=O)=O)cc2)n1	8	15	26	55	72	60	8	0	0	23	45	0	3	5	0	0	0	0	0	12	0	0	0	0	84	76	75	2	86	0	6	7	0	0	0	27	83	25	0	0	0	0	5	0	0	0
GSK1379717	UNC10225329A	2-anilino-4-pyrrolidinopyrimidine	Cn1cncc1C(=O)NC1CCN(C1)c1ccnc(Nc2ccc(F)cc2)n1	9	9	8	31	0	4	0	24	0	24	2	0	2	26	0	0	0	0	0	12	0	9	10	3	0	23	8	0	7	0	5	0	6	0	0	0	1	0	0	32	16	0	22	12	0	0
GSK1379746	UNC10225330A	2-anilino-4-pyrrolidinopyrimidine	COC(=O)c1cccc(NC(=O)NC2CCN(C2)c2ccnc(Nc3ccc(OC)cc3)n2)c1	3	4	8	18	0	0	13	41	0	0	0	0	18	52	0	11	0	20	0	0	0	31	22	0	10	25	28	0	6	0	9	0	26	3	7	28	0	0	2	75	0	4	3	0	100	100
GSK2376236	UNC10225331A	3-Amino-6-aryl-indazole	CC[C@@H]1CO[C@@H](CN1c1cc(nc(NC)n1)-c1ccc2c(N)n[nH]c2c1)C(=O)Nc1ccccc1	4	7	11	19	0	0	0	0	0	0	0	0	27	12	0	15	0	0	0	1	0	14	4	0	9	0	48	0	15	0	0	0	0	41	0	7	0	1	0	0	7	29	19	13	0	0
GSK2297430	UNC10225332A	morpholino-imidazo-pyrimidinones	Fc1cccc(Cn2ccn3c2nc(cc3=O)N2CCOCC2)c1	2	2	3	5	0	0	2	1	0	6	0	14	9	0	0	9	0	8	5	21	0	7	0	6	0	0	32	14	26	32	0	0	0	12	6	23	0	0	0	0	4	4	15	0	0	0
GW692089	UNC10225333A	2-aminobenzimidazole	Cl.COC(=O)Nc1nc2ccc(Oc3ccc(NC(=O)Nc4cc(ccc4F)C(F)(F)F)cc3)cc2n1C	19	27	35	0	98.4	49	84	0	0	0	0	0	0	33	0	0	0	3	0	22	31	16	40	0	0	94.1	14	95	0	27	0	0	11	5	57	0	0	26	59	42	0	0	1	0	0	0
SKF-104493	UNC10225334A	4-pyridinyl_ortho-aryl_azoles	COc1ccc(cc1)-c1nc2CCCn2c1-c1ccncc1	1	2	2	0	51	20	5	0	19	0	0	0	0	12	0	0	19	0	11	0	0	0	0	30	16	23	0	14	10	0	0	0	39	0	23	2	0	0	14	67	0	0	12	0	0	0
SKF-104493	UNC10225334B	4-pyridinyl_ortho-aryl_azoles	COc1ccc(cc1)-c1nc2CCCn2c1-c1ccncc1	2	2	1	0	2	0	0	0	19	0	0	0	6	6	0	3	0	0	9	0	16	12	2	6	23	7	0	0	0	0	0	1	2	11	0	0	0	0	0	78	7	26	7	0	0	0
GSK1379901	UNC10225335A	2-anilino-4-aminopyrimidine	COc1ccc(Nc2nccc(NCCNC(=O)Nc3ccccc3F)n2)cc1	2	3	4	80	0	1	0	21	0	0	0	0	15	25	0	0	0	48	0	0	22	23	0	4	12	36	28	0	12	0	0	0	6	2	0	36	16	0	0	53	1	35	3	69	0	0
GSK175726	UNC10225336A	2,4-dianilinopyrimidine	Clc1cc(Cl)cc(Nc2ccnc(Nc3cc(Cl)cc(Cl)c3)n2)c1	2	4	5	0	68	51	29	58	28	0	39	43	31	3	0	0	0	18	18	0	18	8	4	3	90	0	13	2	8	6	0	0	5	26	0	21	0	0	0	10	7	3	10	0	4	0
SB-693578	UNC10225337A	4-aryl-7-azaindole	c1cc2c(ccnc2[nH]1)-c1ccccc1	4	7	9	68	0	4	16	0	0	0	0	0	6	40	0	6	0	33	0	0	0	20	2	19	17	41	0	0	0	4	1	0	47	0	4	14	0	100	0	58	14	11	9	15	0	15
SB-360737	UNC10225338A	3-anilino-4-aryl maleimide	OC(=O)c1cccc(NC2=C(C(=O)NC2=O)c2ccc(Cl)cc2)c1	0	0	1	6	5	14	15	6	0	0	6	0	5	22	0	6	0	24	0	16	3	3	12	15	1	15	12	0	18	0	4	0	19	0	3	2	0	0	0	39	1	26	7	0	0	0
GSK429286	UNC10225339A	5-acylamino-indazoles	CC1=C(C(CC(=O)N1)c1ccc(cc1)C(F)(F)F)C(=O)Nc1cc2cn[nH]c2cc1F	2	4	7	0	0	0	19	0	0	83	0	0	11	11	0	20	0	29	23	19	0	7	0	24	23	1	46	0	19	42	0	0	6	4	7	20	5	0	0	18	0	8	7	0	0	0
SKF-97293	UNC10225340A	6-aminopurines and related	Nc1ncnc2n(c(nc12)-c1ccccc1)-c1ccccc1	0	0	0	0	8	0	2	0	7	4	0	14	11	0	2	3	16	52	23	31	29	0	0	29	24	47	0	14	4	0	8	17	46	15	6	1	15	27	0	46	13	6	8	0	3	1
GSK326180	UNC10225342A	4-pyrimidinyl_ortho-aryl_azoles	CCS(=O)(=O)c1ccc(OC)c(Nc2nccc(n2)-c2c(nn3ncccc23)-c2cccc(NC(=O)c3c(F)cccc3F)c2)c1	15	20	19	22	4	10	10	10	0	0	0	0	0	18	0	15	0	25	2	27	0	18	20	9	15	25	60	9	40	36	0	0	4	0	90	93.5	0	0	15	28	9	33	12	7	0	0
GSK2297099	UNC10225343A	morpholino-imidazo-pyrimidinones	Fc1ccc(Cn2ccn3c2nc(cc3=O)N2CCOCC2)cc1Cl	3	3	4	24	0	0	0	0	0	0	0	0	0	11	0	13	0	20	0	19	13	14	2	0	0	0	0	0	0	13	0	0	0	5	8	0	0	0	0	0	17	32	9	11	0	0
GSK2228768	UNC10225344A	3-Amino-6-aryl-indazole	Nc1n[nH]c2cc(ccc12)-c1cc(nc(N)n1)N1CCCCC1	2	2	2	53	0	0	12	0	0	0	0	0	0	6	0	0	0	14	0	0	3	0	0	9	0	14	23	0	56	4	0	0	0	0	0	0	5	0	0	21	13	8	5	0	0	0
GW440138	UNC10225345A	4-anilinoquinoline	Cl.N(c1ccc2[nH]ccc2c1)c1ccnc2cc(ccc12)-c1ccccn1	9	14	20	10	85	94.1	48	55	0	29	89	12	2	38	0	0	0	25	0	0	11	4	0	0	8	0	1	0	2	70	0	5	26	5	0	28	0	0	0	64	0	11	0	0	0	0
SB-342411	UNC10225346A	3-anilino-4-aryl maleimide	CSc1ccc(NC2=C(C(=O)NC2=O)c2ccccc2Cl)cc1	2	4	10	24	0	0	3	0	0	0	0	0	16	0	0	11	0	0	25	0	20	0	0	0	21	2	13	3	19	0	0	0	5	34	21	14	0	12	0	0	3	0	22	19	18	13
GSK1379742	UNC10225347A	2-anilino-4-pyrrolidinopyrimidine	COc1ccc(Nc2nccc(n2)N2CCC(C2)NC(=O)Nc2cccc(OC)c2)cc1	0	0	2	4	0	0	12	7	0	0	0	0	1	14	0	0	0	25	1	0	0	25	5	13	0	53	10	0	13	37	0	0	12	0	2	10	4	0	0	29	0	17	0	0	0	0
GSK483724	UNC10225348A	benzimidazole_N-thiophenes	C[C@@H](Oc1cc(sc1C(N)=O)-n1cnc2ccc(cc12)-c1ccncc1)c1ccccc1Cl	15	27	39	60	0	0	21	32	0	0	0	0	52	76	41	22	0	20	8	12	17	0	10	0	0	19	50	32	92.9	31	0	0	3	27	8	25	24	20	0	41	40	8	21	21	15	0
GSK1576028	UNC10225349A	2,4-dianilinopyrimidine	Cl.CNC(=O)c1ccccc1Nc1nc(Nc2ccc(cc2)N2CCOCC2)ncc1Cl	161	205	234	89	98.8	99.6	95.6	95	85	18	43	42	35	44	42	62	0	88	99.2	99.4	12	99.8	0	16	100	99.9	100	100	100	99.7	28	100	53	91.4	72	94.6	78	92.4	96.9	96.7	77	39	54	30	25	14
SB-731284	UNC10225350A	3-amino-6-aryl-pyrazolopyridine	O=C(Nc1n[nH]c2cc(ccc12)-c1cccs1)C1CC1	3	11	16	73	81	61	0	0	0	0	17	0	0	0	0	0	0	28	0	0	45	0	0	39	42	51	42	0	84	0	2	35	24	11	68	0	54	30	54	0	11	0	6	0	0	0
GSK1326180	UNC10225351A	pyrrole-2-carboxamide	Fc1cccc(F)c1NC(=O)c1cc(c[nH]1)C(=O)c1ccccc1F	0	0	0	0	0	0	0	0	20	0	0	9	11	20	0	0	0	33	0	0	2	0	8	0	0	0	0	24	0	0	6	0	1	18	0	11	0	0	0	31	17	33	13	6	2	0
GW630813	UNC10225352A	4-pyrimidinyl_ortho-aryl_azoles	OCCCNc1nccc(n1)-c1c(nn2cc(ccc12)C(F)(F)F)-c1cccc(c1)C(F)(F)F	3	5	4	0	0	0	0	0	0	0	0	0	68	43	0	0	0	0	0	0	5	0	0	0	17	0	7	0	0	33	0	0	0	13	0	0	0	0	0	42	11	0	14	1	0	0
GSK1014915	UNC10225353A	diarylurea	Cc1ccc(NC(=O)Nc2cc(nn2-c2ccccc2)C(C)(C)C)cc1	9	12	12	0	0	2	14	7	0	6	5	5	25	25	0	14	20	28	0	11	0	0	1	22	0	17	18	2	22	20	0	0	37	14	74	20	100	0	0	21	0	33	3	0	0	0
GW839464	UNC10225354A	diarylurea	Cc1ccc(cc1)-n1nc(cc1NC(=O)Nc1ccc(OCCN2CCOCC2)c2ccccc12)C(C)(C)C	17	22	22	2	65	24	22	18	0	0	3	0	21	7	9	0	0	0	15	9	30	0	11	0	0	1	0	12	0	19	26	4	6	4	43	4	6	0	0	0	4	0	4	6	13	13
GSK2269905	UNC10225355A	morpholino-imidazo-pyrimidinones	Cc1ccccc1Cn1ccn2c1nc(cc2=O)N1CCOCC1	4	5	5	24	0	0	11	25	0	0	0	0	16	17	0	16	0	28	0	1	10	5	0	0	0	30	0	9	16	10	0	0	0	3	0	22	0	98.6	0	0	2	0	0	3	0	0
GSK2197149	UNC10225356A	carboxamide pyrimidine	Cl.Cc1cccc(Nc2nc(N[C@H]3CCNC3)ncc2C(N)=O)c1	10	30	50	75	40	66	25	0	0	2	7	0	28	0	0	7	0	47	22	33	79	34	0	3	0	0	58	24	96.9	69	0	0	0	16	4	7	0	0	0	44	41	68	55	8	0	0
SB-222517	UNC10225357A	4-pyrimidinyl_ortho-aryl_azoles	Cc1cc(nc(N)n1)-c1c(ncn1CCCN1CCOCC1)-c1ccc(F)cc1	0	0	0	14	37	18	0	0	21	0	0	0	1	0	16	0	23	0	10	27	0	0	0	14	28	39	3	0	0	8	20	0	35	5	0	0	0	17	0	0	17	0	12	44	0	30
GW829116	UNC10225358A	4-pyrimidinyl_ortho-aryl_azoles	Clc1ccc(cc1)-c1nn2ncccc2c1-c1ccnc(Nc2ccc3OCCOc3c2)n1	13	22	24	0	61	7	0	0	28	14	54	4	16	90.4	13	0	0	0	0	0	0	0	0	0	18	0	0	0	0	48	0	0	0	0	52	0	0	0	0	93.1	0	0	0	0	0	0
GSK1398470	UNC10225359A	Biphenylamide	Cc1ccc(NC(=O)Nc2ccc(Cl)c(c2)C(F)(F)F)cc1-c1ccc(cc1)C(=O)Nc1ccncc1	6	8	8	3	1	0	34	1	5	0	0	0	14	2	0	16	0	0	2	16	15	14	0	0	0	0	8	17	8	7	6	0	0	21	73	29	7	0	0	9	17	2	15	12	0	4
GI262866	UNC10225360A	4-anilino-quinazoline and analogues	Oc1ccc2ncnc(Nc3ccc(OCc4ccccc4)cc3)c2c1	4	6	8	0	0	0	7	0	0	0	9	0	0	0	0	9	0	21	4	0	0	15	0	7	0	21	34	5	20	31	0	0	0	0	0	4	2	0	4	18	17	1	4	0	0	0
GW856795	UNC10225361A	4-anilinoquinoline	CC(C)(C)c1ccc2nccc(Nc3cccc(O)c3)c2c1	7	14	20	0	86	85	33	8	0	26	63	0	0	41	0	0	0	39	0	0	0	0	0	0	0	33	0	70	0	59	0	44	38	0	41	51	0	11	43	24	0	68	13	0	0	0
SKF-97359	UNC10225362A	6-aminopurines and related	CC(C)(C)n1cnc2c(N)ncnc12	1	2	5	0	37	0	1	0	0	0	0	0	0	31	0	0	0	29	0	0	0	19	0	0	0	15	0	45	0	0	0	0	36	0	0	0	0	3	19	52	0	63	1	0	0	0
GSK1379896	UNC10225363A	2-anilino-4-aminopyrimidine	COc1ccc(Nc2nccc(NCCNC(=O)c3cc4ccccc4s3)n2)cc1	0	0	0	7	0	0	9	0	0	0	0	0	10	29	0	0	0	6	0	0	6	3	0	0	16	0	17	14	4	23	0	0	0	17	0	1	6	0	0	9	4	39	6	0	0	0
GW497681	UNC10225364A	2,4-diaminopyrimidine	Cc1cc(NCC(c2ccccc2)c2ccccc2)nc(NCc2ccc(cc2)C(F)(F)F)n1	0	1	1	0	0	0	0	0	0	0	0	0	10	86	0	0	0	3	0	0	9	13	0	0	7	15	8	0	0	25	0	0	14	18	0	2	0	0	0	35	12	0	17	3	0	0
SB-742034	UNC10225365A	3-amino-6-aryl-pyrazolopyridine	O[C@H]([C@@H](O)C(O)=O)C(O)=O.Brc1cc2c(NC(=O)C3CCN(Cc4ccccc4)C3)n[nH]c2nc1-c1ccco1	1	6	9	29	33	23	4	0	20	21	0	28	7	0	0	3	3	5	9	0	11	0	13	17	34	17	7	13	0	0	32	10	16	0	0	9	18	37	0	0	29	0	22	10	30	20
SKF-97263	UNC10225367A	6-aminopurines and related	CC(C)(C)c1ccc(cc1)-n1cnc2c(N)ncnc12	3	5	5	1	0	0	7	10	0	7	0	0	23	0	0	12	0	7	14	21	24	10	1	1	7	16	16	15	19	6	0	5	6	16	0	6	18	0	0	18	10	12	9	0	0	0
GSK683281	UNC10225369A	4-amino-3-aryl-thienopyridine and analogues	Nc1ncc(-c2cccnc2)c2scc(-c3ccc4N(CCc4c3)C(=O)Cc3ccccc3)c12	15	20	27	24	94.1	54	62	0	0	0	0	3	5	32	0	21	0	29	97.4	20	19	32	22	10	25	70	70	89	16	82	6	0	3	20	0	68	27	0	0	0	22	0	22	21	0	0
SKF-96418	UNC10225370A	6-aminopurines and related	CCn1cnc2c(NCc3ccccc3)ncnc12	0	0	0	0	21	9	0	0	0	0	0	0	0	0	0	0	0	0	3	0	0	0	0	0	0	41	0	0	0	16	0	0	48	0	9	0	0	0	0	50	0	0	1	0	0	0
GSK204607	UNC10225372A	benzimidazole_N-thiophenes	COc1cc2ncn(-c3cc(OCC4CCCO4)c(s3)C(N)=O)c2cc1OC	9	12	15	17	0	0	0	46	0	0	0	0	23	12	0	0	0	0	0	2	0	17	7	0	0	1	80	0	72	0	0	0	24	19	0	18	15	7	0	32	6	0	13	0	0	0
SB-390530	UNC10225373A	3-anilino-4-aryl maleimide	Oc1c(Cl)cc(NC2=C(C(=O)NC2=O)c2ccccc2)cc1Cl	1	2	2	0	31	0	19	0	3	10	23	0	0	3	2	21	0	0	17	9	15	0	0	0	9	13	23	0	33	0	21	22	45	0	0	0	0	0	26	0	6	7	0	0	0	0
GSK2224810	UNC10225374A	3-Amino-6-aryl-indazole	CNc1cc(nc(N)n1)-c1ccc2c(N)n[nH]c2c1	2	8	14	64	0	0	0	29	21	43	56	0	13	13	0	0	0	5	0	0	10	0	0	0	4	0	10	0	74	0	16	78	5	15	0	6	2	0	0	53	24	8	23	0	0	13
GSK1379731	UNC10225375A	2-anilino-4-pyrrolidinopyrimidine	COc1ccc(Nc2nccc(n2)N2CCC(C2)NC(=O)Nc2cccc(c2)C(C)=O)cc1	1	1	3	0	0	0	7	0	0	0	11	0	0	11	0	0	0	15	0	0	0	50	0	0	0	0	40	9	30	35	0	0	0	0	0	7	0	0	0	0	37	13	40	0	0	0
GW621581	UNC10225376A	4-pyrimidinyl_ortho-aryl_azoles	CN1CCN(CCCNc2nccc(n2)-c2c(nn3cc(ccc23)C(F)(F)F)-c2ccc(F)cc2)CC1	10	13	16	1	0	0	9	40	83	0	0	26	70	97.1	0	0	0	9	0	19	0	21	6	0	0	11	0	10	11	50	0	0	0	0	41	9	2	1	0	26	5	5	11	0	0	0
SB-245391	UNC10225377A	4-pyrimidinyl_ortho-aryl_azoles	Fc1ccc(cc1)-c1ncn(C2CCNCC2)c1-c1ccnc(Oc2ccc(cc2)-c2ccccc2)n1	7	11	15	14	1	16	1	0	72	19	0	19	0	0	20	31	15	39	7	20	7	1	23	12	53	39	0	18	0	20	18	2	46	0	23	7	14	16	57	20	30	4	30	4	20	0
GW272142	UNC10225378A	4-anilino-quinazoline and analogues	Cl.C(c1ccccc1)n1cnc2cc(Nc3ncnc4ccccc34)ccc12	0	0	3	5	0	0	9	17	0	0	2	0	13	34	0	3	0	21	0	0	0	0	4	2	0	19	14	0	34	0	0	0	0	6	0	11	4	0	0	38	0	31	0	0	0	0
GW867253	UNC10225379A	4-6-di-Ar-quinoline	NS(=O)(=O)c1cccc(c1)-c1ccc2nccc(-c3cccc(c3)S(N)(=O)=O)c2c1	1	3	4	27	36	15	0	0	0	0	0	0	0	10	2	0	10	0	0	6	0	0	0	0	19	45	0	0	0	0	0	3	33	0	0	0	0	5	0	17	0	0	0	0	0	0
GSK2206003	UNC10225381A	3-Amino-6-aryl-indazole	CNc1nccc(n1)-c1ccc2c(N)n[nH]c2c1	11	20	28	74	7	3	20	7	10	8	67	0	1	26	0	0	0	33	0	0	33	0	0	0	8	0	46	0	94.1	54	7	71	6	2	0	10	22	15	3	71	24	0	28	22	14	31
SB-211742	UNC10225382A	4-pyridinyl_ortho-aryl_azoles	Fc1ccc(cc1)-c1ncn(CCCN2CCOCC2)c1-c1ccccn1	1	1	1	0	39	12	7	0	1	0	19	0	3	6	15	4	0	19	10	0	0	0	10	0	0	0	0	6	23	9	7	0	0	0	0	2	6	14	15	0	0	0	0	0	6	10
SB-734909	UNC10225384A	3-amino-6-aryl-pyrazolopyridine	Clc1cc2c(NC(=O)C3CC3)n[nH]c2nc1-c1ccccc1	3	5	5	28	76	57	0	0	7	7	8	0	0	0	0	0	0	15	0	10	19	1	0	21	28	33	25	0	21	0	9	27	0	1	62	0	70	51	0	0	0	0	0	0	0	0
GW854278	UNC10225386A	benzimidazole_N-thiophenes	COc1cc2ncn(-c3cc(OCc4ccncc4Br)c(s3)C(N)=O)c2cc1OC	5	8	10	17	15	0	5	5	9	8	2	0	15	0	0	0	0	0	7	0	5	0	6	6	0	20	20	30	39	11	8	6	13	10	2	6	25	20	0	0	0	0	0	7	37	46
GW412617	UNC10225387B	2-amino-5-arylpyridine	Cl.C[C@H](N[C@@H]1CCc2cc(ccc2C1)-c1cnc(N)c(C)c1)c1ccccc1	5	8	11	100	8	9	6	34	0	0	0	37	41	1	0	27	14	52	2	20	69	13	33	0	0	35	26	33	40	13	0	0	0	50	1	22	0	0	0	17	23	4	13	100	0	0
GSK1398472	UNC10225388A	Biphenylamide	Cc1ccc(NC(=O)Nc2ccc(Cl)cc2)cc1-c1ccc(cc1)C(=O)Nc1ccncc1	3	6	6	0	2	5	28	15	0	0	0	0	22	23	0	0	0	46	3	3	12	1	11	0	0	28	10	11	18	21	0	0	0	15	43	30	0	0	0	43	10	34	13	0	0	0
SKF-97255	UNC10225389A	6-aminopurines and related	CCCCCc1nc2c(N)ncnc2n1CCCCC	1	1	2	6	31	30	0	0	26	0	0	13	1	0	0	0	0	0	3	11	0	0	0	0	10	37	0	0	0	16	19	0	40	3	0	0	0	22	0	0	0	0	0	15	0	0
GW440148	UNC10225390A	4-anilinoquinoline	Cl.CC(=O)Nc1ccc(COc2ccc(Nc3ccnc4cc(ccc34)-c3ccccn3)cc2)cc1	11	13	16	13	35	19	11	0	0	0	59	3	18	26	0	15	0	6	0	11	8	18	10	0	14	67	46	1	8	53	0	0	1	17	0	57	0	0	0	5	20	23	10	7	0	0
GSK1379748	UNC10225391A	2-anilino-4-pyrrolidinopyrimidine	COc1ccc(CNC(=O)NC2CCN(C2)c2ccnc(Nc3cc(OC)c(OC)c(OC)c3)n2)cc1	4	8	13	49	0	0	0	15	0	0	0	0	24	76	0	0	0	27	10	0	33	25	0	12	79	84	60	8	25	0	1	0	0	21	0	3	0	0	32	32	28	2	15	8	0	0
SB-711805	UNC10225392A	3-amino-6-aryl-pyrazolopyridine	Oc1cccc(c1)-c1ccc2c(NC(=O)C3CC3)n[nH]c2n1	14	23	26	33	94.2	88	27	32	13	43	74	0	0	0	0	0	4	0	0	0	0	0	0	0	9	19	23	12	34	0	8	86	34	4	46	0	53	17	0	0	0	0	19	0	0	0
GSK507274	UNC10225393A	aminofurazan	OC(=O)C(F)(F)F.OC(=O)C(F)(F)F.CCn1c(nc2c(ncc(OCCCCN)c12)C#CC(C)(C)O)-c1nonc1N	22	33	40	41	0	4	11	3	0	7	0	0	26	13	93.5	99.1	72	28	1	0	0	50	0	16	0	38	9	0	26	8	14	0	12	19	8	27	0	0	0	37	31	0	40	7	0	0
SB-684387	UNC10225395A	4-pyridinyl_ortho-aryl_azoles	Cl.Cl.CN(C)CCOc1ccc(cc1)-c1cc(c([nH]1)-c1ccncc1)-c1ccc(Cl)c(O)c1	9	16	22	0	50	59	34	31	90.5	0	51	0	33	21	0	0	55	18	0	11	8	1	15	0	21	0	0	0	0	64	90.6	29	10	27	96.6	75	0	0	0	83	24	40	23	0	0	0
SB-738004	UNC10225396A	aminofurazan	CCn1c(nc2cncc(Br)c12)-c1nonc1N	9	12	20	67	0	0	0	0	30	0	9	0	25	23	0	13	0	31	18	0	1	0	13	0	14	17	0	22	23	0	0	17	58	27	0	10	0	0	47	93.7	14	34	15	16	27	29
GSK1379754	UNC10225397A	2-anilino-4-pyrrolidinopyrimidine	COc1cc(Nc2nccc(n2)N2CCC(C2)NC(=O)c2cccc(NC(C)=O)c2)cc(OC)c1OC	9	14	17	76	0	0	13	63	0	17	18	0	10	36	0	0	0	29	8	12	34	31	0	0	97.6	0	88	36	86	34	0	0	0	18	3	19	26	0	0	0	40	7	27	6	0	0
GSK1398477	UNC10225398A	Biphenylamide	Cc1ccc(NC(=O)Nc2ccccc2F)cc1-c1ccc(cc1)C(=O)Nc1ccncc1	3	6	6	28	7	0	31	32	3	21	14	5	22	25	0	22	0	25	7	23	0	8	12	21	0	0	27	25	28	51	7	0	0	29	20	34	15	13	0	0	29	59	33	16	0	0
GW639905	UNC10225399A	2,4-dianilinopyrimidine	Cl.N#CCc1ccc(Nc2nccc(Nc3ccc(Oc4ccccc4)cc3)n2)cc1	16	18	24	7	0	9	13	26	0	100	0	0	6	72	0	4	0	40	0	0	98.9	0	0	7	6	31	34	22	26	94.1	0	0	0	34	0	60	0	0	0	0	10	31	0	0	0	0
GSK1535721	UNC10225400A	3-amino-6-aryl-quinoxaline	NS(=O)(=O)c1cccc(c1)-c1ccc2ncc(nc2c1)N1CCOCC1	0	3	3	26	1	0	0	21	0	0	0	0	28	9	0	4	0	6	1	12	15	0	0	0	19	0	0	2	0	0	0	7	2	30	0	13	0	0	1	0	12	7	18	15	0	2
SB-390526	UNC10225401A	3-anilino-4-aryl maleimide	OC(=O)c1cccc(NC2=C(C(=O)NC2=O)c2ccccc2Cl)c1	5	7	9	0	0	99.3	10	0	22	0	0	0	4	16	0	0	0	0	0	0	0	0	9	5	8	15	0	0	0	14	0	0	1	12	0	12	9	0	4	9	1	39	7	0	2	0
GW784041	UNC10225402A	2,4-dianilinopyrimidine	Cl.COc1ccc(C)c(Nc2ccnc(Nc3ccc(cc3)-c3cnc[nH]3)n2)c1	16	19	23	29	95.4	97.1	92.8	99	74	93.5	93.3	91.7	40	53	14	0	8	0	30	0	0	99.3	0	0	20	8	56	0	37	59	70	99.9	0	46	0	20	8	9	0	0	17	0	25	8	0	1
GSK2373690	UNC10225403A	morpholino-triazolo-pyrimidinones	C[C@@H]1CN(CCO1)c1cc(=O)n2nc(C)n(Cc3cccc(c3C)C(F)(F)F)c2n1	2	2	2	0	0	2	24	2	0	3	0	0	22	24	0	6	28	22	0	27	0	2	11	15	0	27	30	0	31	10	15	0	0	21	0	32	7	0	0	0	7	0	7	0	0	0
GW679662	UNC10225404A	Biphenylamide	Cc1nnc(o1)-c1ccc(C)c(c1)-c1ccc(cc1)C(=O)NCC1CC1	1	2	1	0	0	0	0	6	0	0	0	0	1	0	0	6	0	15	0	18	4	0	0	0	0	3	0	9	22	23	0	0	0	0	7	0	6	0	0	16	0	0	5	0	31	41
GSK1034945	UNC10225405A	3-Amino-6-aryl-indazole	Nc1n[nH]c2cc(ccc12)-c1ccnc(N)n1	11	19	24	65	0	0	9	0	0	0	44	0	1	33	0	10	0	20	0	0	31	0	0	0	0	0	51	0	94.4	25	12	87	0	0	0	4	41	15	0	73	11	10	7	0	0	5
SB-404290	UNC10225406A	3-anilino-4-aryl maleimide	CN1C(=O)C(Nc2ccc(Cl)c(c2)C(O)=O)=C(C1=O)c1ccc(Cl)cc1	3	3	4	100	21	0	19	12	4	0	0	0	0	10	0	0	1	0	6	0	0	0	0	33	19	31	5	10	0	0	4	0	25	0	0	0	0	0	0	0	22	0	17	100	17	0
SB-733416	UNC10225407A	Imidazolopyridine	CCn1c(nc2cnccc12)-c1ccccc1	1	1	1	0	0	13	5	23	0	20	15	10	8	0	0	14	0	36	0	0	0	8	28	17	0	0	30	10	28	0	0	0	10	0	49	27	0	1	0	2	0	44	8	0	0	0
SKF-97184	UNC10225410A	6-aminopurines and related	Nc1ncnc2n(cnc12)-c1cccc2ccccc12	2	2	3	0	46	26	0	0	0	0	0	26	0	52	8	0	0	0	0	21	0	0	0	0	0	28	0	0	0	6	0	0	35	0	0	0	0	22	0	37	20	27	10	8	0	0
SB-642124	UNC10225411A	3-amino-5-aryl-pyrazolopyridine	Nc1n[nH]c2cnc(cc12)-c1ccccc1	10	13	21	37	0	0	16	41	0	0	13	0	19	24	0	8	0	30	0	30	23	0	6	0	4	32	100	0	99.4	0	0	53	33	5	7	19	13	7	0	44	5	8	0	10	0	13
GSK1389063	UNC10225412A	4-aryl-7-azaindole	Cl.Cl.COc1ccc(C[C@@H](CN)NC(=O)c2cc(Br)c(s2)-c2ccnc3[nH]ccc23)cc1	65	97	114	48	15	41	31	24	0	13	48	0	50	97.6	94.4	91.5	91.9	63	91.4	89	5	96.8	0	16	80	86	92.4	95.2	94	0	0	0	73	12	14	0	46	34	0	58	23	48	26	21	7	0
SKF-97236	UNC10225413A	6-aminopurines and related	COc1ccc(cc1)-n1cnc2c(N)ncnc12	2	3	3	15	28	1	10	7	21	35	32	10	0	0	0	1	11	0	16	20	17	0	0	0	0	16	63	22	55	16	34	0	0	0	5	0	2	14	8	4	5	25	10	0	0	0
GW696155	UNC10225414A	4-pyrimidinyl-azoles	CC(C)Oc1ccc2c(cnn2n1)-c1ccnc(Nc2ccc(cc2)N2CCN(C)CC2)n1	86	112	131	90	39	53	14	69	0	0	0	0	20	83	0	0	0	42	41	52	20	95.5	0	0	98.6	70	75	74	99.8	23	0	90.5	19	4	43	6	0	0	20	99.4	71	96.3	97.8	56	44	31
GSK2334006	UNC10225415A	morpholino-imidazo-pyrimidinones	Cc1cn2c(nc(cc2=O)N2CCOCC2)n1Cc1cccc(Cl)c1Cl	2	3	4	14	73	63	41	18	9	8	23	0	7	17	0	26	26	6	29	0	0	14	1	3	0	26	44	0	27	37	19	0	0	10	15	5	14	0	0	4	12	40	14	30	0	0
GSK580432	UNC10225416A	benzimidazole_N-thiophenes	C[C@@H](Oc1cc(sc1C(N)=O)-n1cnc2cc(ccc12)-c1cnn(C)c1)c1ccccc1Cl	39	58	68	82	58	63	63	0	0	0	25	0	13	29	0	0	0	31	39	27	0	98.7	0	15	38	90.6	100	97.4	100	89	19	0	0	22	0	0	82	93.3	0	27	39	22	31	26	0	9
GSK2363608	UNC10225417A	morpholino-triazolo-pyrimidinones	CSc1nn2c(nc(cc2=O)N2CCOCC2)n1Cc1cccc(c1C)C(F)(F)F	10	11	11	3	0	0	5	0	0	0	3	0	5	31	0	9	0	23	0	14	0	13	14	86	0	0	24	3	20	8	17	0	22	8	0	0	7	4	0	13	1	31	9	0	0	0
SB-217360	UNC10225418A	4-pyridinyl_ortho-aryl_azoles	Fc1ccc(cc1)-c1nc[nH]c1-c1ccncc1	7	9	10	0	4	33	0	0	13	5	50	0	0	18	4	0	0	10	5	0	0	0	0	0	8	33	0	0	0	25	0	0	22	0	50	0	0	0	0	84	0	0	10	0	0	0
SB-737447	UNC10225419A	3-acylamino-6-aryl-indazole	O=C(Nc1n[nH]c2cc(ccc12)-c1ccco1)C1CC1	4	7	10	100	37	28	0	0	5	9	0	0	8	7	0	0	0	7	3	0	27	0	0	4	46	12	34	0	53	0	0	14	0	0	0	0	31	46	0	0	5	0	0	100	39	34
SB-238039	UNC10225420A	4-pyrimidinyl_ortho-aryl_azoles	Cl.Cl.Cl.Fc1ccc(cc1)-c1ncn(C2CCNCC2)c1-c1ccnc(Nc2ccccc2)n1	30	41	43	0	0	31	5	16	58	0	0	20	0	25	21	10	24	21	15	17	0	9	34	0	16	25	0	0	0	56	0	0	42	0	19	0	0	7	0	88	7	0	0	9	0	0
SB-238039	UNC10225420B	4-pyrimidinyl_ortho-aryl_azoles	Cl.Cl.Cl.Fc1ccc(cc1)-c1ncn(C2CCNCC2)c1-c1ccnc(Nc2ccccc2)n1	26	32	35	0	63	12	3	16	31	0	18	17	0	1	0	7	37	0	2	0	0	10	1	0	36	0	19	44	9	27	0	0	11	0	0	19	29	9	9	65	0	42	9	0	0	0
GW812171	UNC10225421A	4-pyridinyl (with 2 aryl) _ortho-aryl_azoles	O=C(N1CCOCC1)c1ccc(cc1)-c1cc(ccn1)-c1c[nH]nc1-c1ccccn1	1	1	2	0	36	29	2	0	76	0	0	0	0	0	5	0	0	5	19	22	14	0	0	0	13	33	0	0	0	0	0	11	16	0	32	0	0	10	0	20	14	0	21	0	0	0
GW424170	UNC10225422A	4-anilino-quinazoline and analogues	Cl.Fc1ccccc1COc1ccc(Nc2ncnc3ccc(cc23)-c2nnc(o2)C(F)(F)F)cc1Cl	2	2	2	0	0	0	0	0	0	0	0	0	0	22	0	0	0	0	0	0	0	0	0	0	13	0	0	0	9	21	0	0	5	1	0	6	0	0	0	0	13	0	8	0	0	0
GSK1379741	UNC10225424A	2-anilino-4-pyrrolidinopyrimidine	COc1ccc(Nc2nccc(n2)N2CCC(C2)NC(=O)Nc2cc(C)ccc2C)cc1	1	1	2	17	0	0	14	0	0	0	0	0	0	32	0	10	0	25	0	0	0	11	12	0	15	37	46	0	0	0	0	0	0	0	0	5	0	0	0	33	0	13	0	0	0	0
SB-217780	UNC10225425A	4-pyridinyl_ortho-aryl_azoles	FC(F)(F)c1ccc(cc1)-c1ncn(CCCN2CCOCC2)c1-c1ccncc1	0	2	2	7	44	0	8	0	10	0	0	4	1	8	0	0	28	0	9	4	0	0	0	0	0	0	27	40	13	4	7	0	39	1	0	4	13	7	0	0	0	35	23	3	0	0
SB-217146	UNC10225426A	4-pyrimidinyl_ortho-aryl_azoles	Cl.CSc1nccc(n1)-c1c(ncn1CCCN1CCOCC1)-c1ccc(F)cc1	0	0	0	0	35	31	0	0	0	0	0	0	0	25	14	0	0	0	0	0	1	0	0	0	7	35	0	0	0	0	0	4	39	0	4	0	0	0	0	14	6	0	12	0	0	0
GSK993273	UNC10225427A	4-aryl-7-azaindole	CS(=O)(=O)Nc1ccc(cc1)-c1ccnc2[nH]ccc12	20	31	46	79	0	1	16	3	0	0	0	0	12	22	0	21	0	18	94.4	0	27	0	44	21	39	48	76	76	97.5	0	1	3	43	0	0	0	8	0	0	35	36	27	38	30	6	7
GW567148	UNC10225428A	4-anilinoquinoline	CN(C)Cc1ccc(o1)-c1ccc2c(Nc3ccc(Oc4ccccn4)cc3)ccnc2c1	16	23	27	0	89	32	18	0	0	0	38	0	0	0	0	0	0	22	8	0	0	18	0	0	0	81	51	2	17	91.5	0	0	28	12	1	95.2	0	0	74	0	27	0	0	0	0	0
GW693542	UNC10225429A	4-pyridinyl_ortho-aryl_azoles	Nc1nc(-c2nccs2)c(s1)-c1ccnc2ccccc12	2	3	5	8	0	6	15	10	14	0	48	15	0	39	0	3	100	36	0	12	6	0	5	0	0	0	0	42	4	42	14	10	9	0	0	3	11	0	0	47	30	7	27	0	0	0
SB-589132	UNC10225431A	4-amino-3-aryl-thienopyridine and analogues	COc1ccc(cc1)-c1oc2ncnc(N)c2c1-c1ccc(OC)cc1	3	4	7	6	21	10	20	21	0	0	0	12	12	55	0	0	0	32	0	10	0	13	11	7	0	30	0	13	0	66	0	0	30	0	38	15	12	0	54	64	19	13	7	0	0	0
GW494702	UNC10225432A	4-anilinoquinoline	Cl.Cc1ccc(cc1)C(=O)Nc1ccc(Nc2ccnc3cc(ccc23)-c2nccs2)cc1O	12	15	19	4	57	12	12	18	0	0	19	0	1	34	12	6	0	0	20	0	21	14	9	0	100	91.3	61	9	9	97	0	0	12	18	1	38	0	0	100	35	13	8	0	15	0	0
GSK327238	UNC10225433A	4-pyrimidinyl_ortho-aryl_azoles	COc1cc(Nc2nccc(n2)-c2c(nn3ncccc23)-c2cccc(NC(=O)c3c(F)cccc3F)c2)cc(OC)c1OC	76	84	94	13	92.9	24	80	0	14	0	0	0	0	93.7	0	11	17	20	9	48	29	97.4	0	8	99.1	92.5	70	91.3	7	99.6	3	0	0	91.4	96	97.6	0	40	94	54	58	0	13	3	0	0
GW697999	UNC10225434A	2-aminobenzimidazole	Cl.COC(=O)Nc1nc2cc(Oc3ccc(NC(=O)Nc4cccc(SC)c4)cc3)ccc2[nH]1	22	34	35	0	91.4	90.1	76	0	0	0	0	0	0	48	0	0	0	25	5	0	10	0	2	0	0	92.5	43	90.1	6	65	0	0	4	0	83	15	3	10	2	44	11	0	7	0	18	28
GSK2347225	UNC10225435A	morpholino-triazolo-pyrimidinones	CSc1nn2c(nc(cc2=O)N2CCOCC2)n1Cc1cccc(Cl)c1Cl	4	6	8	7	0	0	14	18	0	0	12	0	18	28	0	9	1	30	11	20	19	7	14	0	21	0	11	45	29	52	19	1	0	6	0	17	0	0	0	0	0	0	8	17	0	0
GSK1383280	UNC10225436A	4-aryl-7-azaindole	Cl.Cl.CCNCC(Cc1ccccc1)NC(=O)c1cc(Br)c(s1)-c1ccnc2[nH]ccc12	23	41	59	39	15	14	19	0	0	0	2	0	12	89	93.7	81	88	42	49	45	8	60	0	0	96.2	93.6	86	63	79	0	0	0	0	3	0	34	0	0	0	31	41	28	32	11	0	0
GW514786	UNC10225437A	4-pyrimidinyl_ortho-aryl_azoles	CSc1cccc2c(c(nn12)-c1ccc(F)cc1)-c1ccncn1	4	8	12	0	0	0	12	0	43	0	7	0	68	35	0	0	4	29	32	0	0	12	0	29	8	15	7	11	8	19	10	0	11	14	13	9	14	0	11	89	0	0	7	0	0	0
GW811603	UNC10225438A	2,4-dianilinopyrimidine	Cl.CN(c1ccc2n(C)c(NCc3ccccc3)nc2c1)c1ccnc(Nc2ccc(CS(C)(=O)=O)cc2)n1	23	30	41	16	98.9	66	54	0	0	0	0	0	0	7	0	0	1	49	2	0	0	0	9	0	87	79	63	85	24	39	0	4	22	0	96.8	79	0	0	64	0	0	46	5	0	0	0
GSK2333389	UNC10225439A	morpholino-imidazo-pyrimidinones	O=c1cc(nc2n(Cc3cccc4ccccc34)ccn12)N1CCOCC1	2	3	4	0	0	0	17	0	0	9	0	0	6	0	0	20	0	2	0	0	0	33	0	15	0	0	14	0	16	21	0	0	0	7	9	0	1	0	0	32	0	4	15	0	0	0
GSK312879	UNC10225440A	4-pyrimidinyl_ortho-aryl_azoles	Cl.Fc1cccc(F)c1C(=O)Nc1cccc(c1)-c1nn2ncccc2c1-c1ccnc(Nc2cccnc2)n1	6	8	9	0	0	0	21	0	0	0	0	2	27	2	0	19	10	24	0	12	16	0	0	13	0	24	19	11	31	2	0	0	0	24	91.6	21	8	0	0	7	8	27	3	0	0	0
GW552771	UNC10225441A	4-anilinoquinoline	Oc1cc(Nc2ccnc3cc(I)ccc23)ccc1F	12	16	21	10	99.1	99.6	91.7	97.4	54	100	93.7	69	19	38	0	16	0	34	15	1	0	18	0	4	0	8	8	3	5	80	56	99.9	6	15	79	28	11	0	7	57	19	37	8	0	0	0
SB-229482	UNC10225443A	4-pyrimidinyl_ortho-aryl_azoles	CN1CCC(CC1)n1cnc(c1-c1ccnc(NC2CCNCC2)n1)-c1ccc(F)cc1	6	8	8	7	44	0	0	0	0	0	0	7	9	5	0	0	32	22	0	12	0	0	0	0	34	40	0	48	0	10	6	0	1	0	0	0	0	0	10	17	0	28	0	2	0	0
SB-742352	UNC10225444A	3-amino-6-aryl-pyrazolopyridine	O[C@H]([C@@H](O)C(O)=O)C(O)=O.Brc1cc2c(NC(=O)c3ccc(CN4CCCC4)cc3)n[nH]c2nc1-c1ccco1	7	9	11	0	63	36	0	24	0	0	0	0	0	0	0	0	8	0	0	8	0	0	0	0	0	0	0	51	0	0	0	0	0	8	0	0	51	24	0	0	0	0	8	0	2	0
GSK1398475	UNC10225445A	Biphenylamide	COc1ccc(NC(=O)Nc2ccc(C)c(c2)-c2ccc(cc2)C(=O)Nc2ccncc2)cc1	3	5	5	2	0	2	12	43	0	0	0	0	19	34	0	0	0	18	0	0	10	0	4	0	4	0	0	0	0	28	0	0	0	14	0	32	0	0	0	28	4	1	3	0	0	0
GSK507358	UNC10225447A	5-Ar-indazole	OC(=O)C(F)(F)F.OC(=O)C(F)(F)F.Cc1n[nH]c2ccc(cc12)-c1cc(OC[C@@H](N)Cc2ccccc2)cnc1-c1ccoc1	35	49	60	60	25	39	28	0	0	0	0	0	12	98.6	91.7	84	82	18	0	14	0	0	0	4	0	0	0	0	81	6	0	0	14	0	0	0	0	0	83	95	15	27	45	18	0	0
GW680338	UNC10225448A	4-pyridinyl (with 2 aryl) _ortho-aryl_azoles	COc1cccc(c1)-c1cc(ccn1)-c1c[nH]nc1-c1ccccn1	3	5	8	4	0	3	0	24	50	9	18	0	25	26	0	0	0	34	7	0	13	0	0	27	0	0	89	7	54	8	0	0	10	12	12	4	3	0	0	27	0	22	14	0	0	0
GI230329	UNC10225449A	4-anilino-quinazoline and analogues	Cl.COc1cc2ncnc(Nc3cccc(Br)c3)c2cc1OC	3	5	8	13	27	51	18	0	0	0	0	0	19	52	0	0	16	0	0	0	8	17	0	6	6	0	6	10	19	79	0	0	0	10	0	10	20	14	30	96.5	23	0	18	0	0	0
GSK205189	UNC10225450A	benzimidazole_N-thiophenes	COc1cc2ncn(-c3cc(OCCCc4ccccc4)c(s3)C(N)=O)c2cc1OC	4	4	5	35	0	0	5	0	0	0	0	0	24	3	0	2	0	0	28	0	0	0	0	0	0	18	45	13	36	12	0	0	0	11	0	1	1	3	0	20	14	0	16	24	0	0
GSK2181306	UNC10225451A	fused carboxamide pyrimidine	OC(=O)C(F)(F)F.O=c1[nH]ccc2nc(N[C@@H]3CCNC3)nc(Nc3ccc4CCS(=O)(=O)c4c3)c12	125	167	191	87	53	66	26	15	0	0	3	0	14	15	0	0	47	86	89	81	97.4	99.9	0	38	83	72	87	100	98.8	28	0	7	99.5	24	0	18	52	46	29	90.5	82	98.7	98.6	82	59	23
GSK977620	UNC10225452A	4-aryl-7-azaindole	CN(C)CCNS(=O)(=O)c1ccc(cc1)-c1ccnc2[nH]ccc12	18	34	49	21	0	0	8	0	6	0	0	0	10	0	57	18	75	50	53	43	0	39	0	23	2	57	85	93.1	82	6	0	0	0	9	0	16	19	0	0	29	50	0	66	8	0	0
GW684941	UNC10225453A	4-pyrimidinyl-azoles	CCCCc1nn2ncccc2c1-c1ccnc(Nc2ccc(cc2)N2CCN(C)CC2)n1	48	65	82	21	95.8	98.8	96.8	89	67	16	35	51	96.7	93.1	0	0	0	72	5	9	0	62	0	16	96.7	80	82	69	69	81	0	91	0	53	86	69	3	0	57	93.3	28	25	0	0	0	0
SKF-97416	UNC10225454A	6-aminopurines and related	COc1cccc(c1)-n1cnc2c(N)ncnc12	0	1	2	0	56	46	8	0	22	3	0	11	0	8	1	0	22	56	2	15	14	0	4	35	0	31	5	0	0	0	17	24	57	0	18	0	16	6	0	57	16	20	11	0	0	0
SB-735297	UNC10225455A	3-amino-6-aryl-pyrazolopyridine	Brc1cc2c(NC(=O)C3CC3)n[nH]c2nc1-c1cccs1	10	13	13	10	52	30	0	27	0	0	0	0	0	0	0	0	0	0	0	8	9	0	2	13	0	31	6	28	26	0	0	0	26	9	0	0	66	53	0	0	0	0	0	0	100	100
SB-390771	UNC10225456A	3-anilino-4-aryl maleimide	COc1cccc(c1)C1=C(Nc2cccc(O)c2)C(=O)NC1=O	9	13	16	38	0	4	10	18	0	0	6	0	5	32	0	7	0	4	16	3	0	12	7	0	16	24	0	1	0	0	0	0	36	4	0	33	7	7	0	42	4	29	13	0	17	0
GSK1669921	UNC10225457A	4-6-di-Ar-quinoline	CN(C)S(=O)(=O)c1cc(cnc1N)-c1ccc2nccc(-c3cccc(c3)S(N)(=O)=O)c2c1	14	19	22	26	0	0	17	88	0	0	0	0	16	0	0	5	0	30	3	0	5	11	0	5	8	0	17	10	22	18	0	0	3	21	30	11	12	0	0	0	40	0	25	7	1	0
GW682569	UNC10225458A	2,4-dianilinopyrimidine	Cc1n[nH]c2cc(Nc3ccnc(Nc4cccc(CN5CCOCC5)c4)n3)ccc12	17	30	40	71	22	26	23	85	36	0	39	17	19	97.1	0	0	0	16	0	0	17	0	0	0	98.9	55	93.5	35	98.1	0	0	87	6	11	0	47	0	0	60	36	43	37	26	1	0	0
SB-601273	UNC10225459A	pyridopyrimidinone	CCN(CC)CCOc1ccc(Nc2ncc3cc(-c4c(Cl)cccc4Cl)c(=O)n(C)c3n2)cc1	137	162	169	48	100	100	99.6	100	100	97.3	99.7	87	96.5	100	0	0	0	7	19	41	0	31	0	0	62	47	95.4	93.7	58	99.3	100	100	24	99.9	99.8	99.9	72	54	100	56	51	39	50	0	4	0
GSK902056	UNC10225460A	aminofurazan	Cl.Cl.CCn1c(nc2c(nc(OCCN)cc12)C#CC(C)(C)O)-c1nonc1N	9	14	15	15	0	0	13	4	0	0	0	0	6	0	91.9	98.3	71	26	0	0	0	17	12	20	27	38	0	0	20	7	6	0	3	11	38	1	6	0	0	22	0	29	0	0	0	0
GSK846226	UNC10225462A	4-aryl-7-azaindole	O=S(=O)(N1CCCC1)c1ccc(cc1)-c1ccnc2[nH]ccc12	1	9	13	60	0	0	0	24	0	0	0	0	7	21	0	0	0	10	0	0	0	0	3	14	13	20	60	46	87	0	0	0	24	10	0	0	0	0	0	0	39	30	31	33	47	12
GSK1122999	UNC10225463A	isoquinoline	Cl.Cl.C1CC(CCN1)Oc1cc2cnccc2cc1-c1ccccc1	6	10	13	27	0	0	8	22	0	0	0	0	22	42	0	0	0	23	16	22	0	13	0	4	17	10	28	27	27	41	0	0	0	17	0	8	17	6	0	0	3	0	20	29	0	0
SB-317651	UNC10225464A	3-anilino-4-aryl maleimide	Clc1ccc(cc1)C1=C(Nc2cccc(Cl)c2)C(=O)NC1=O	6	8	8	0	47	0	0	0	0	0	0	16	17	0	0	5	0	0	0	0	0	0	3	0	0	35	0	20	0	12	0	0	0	3	0	0	0	1	0	0	0	3	4	0	0	0
GSK1321561	UNC10225466A	4-aryl-7-azaindole	Cl.Cl.NCC(NC(=O)c1cc(c(s1)-c1ccnc2[nH]ccc12)-c1ccccc1)c1ccccc1	21	34	41	47	89	90	87	10	0	4	18	0	95.3	89	57	0	80	27	5	0	0	16	0	1	33	0	69	46	79	58	4	0	0	38	9	8	0	0	0	72	4	24	5	0	0	0
GW494601	UNC10225467A	4-anilinoquinoline	Cl.Oc1cccc(Nc2ccnc3cc(ccc23)-c2ccncc2)c1	35	53	62	42	100	99.9	99.4	99.8	67	97.2	95	81	1	68	0	0	0	47	0	0	43	9	0	0	23	43	32	21	7	99.1	84	99.9	30	28	76	90	14	4	46	81	35	5	5	0	0	0
SB-517081	UNC10225468A	3-amino-5-aryl-pyrazolopyridine	Nc1n[nH]c2ncc(cc12)-c1ccccc1	2	5	7	36	0	18	17	8	0	0	5	0	7	19	0	12	0	38	0	0	28	2	0	0	21	64	27	0	17	13	2	0	34	0	0	24	0	0	0	34	18	58	40	17	0	0
GSK1321565	UNC10225471A	4-aryl-7-azaindole	Cl.Cl.NCC(NCc1ccc(s1)-c1ccnc2[nH]ccc12)c1ccccc1	22	33	49	67	0	0	1	18	0	0	0	0	25	44	71	25	71	64	45	28	22	82	16	0	47	79	97.2	95.1	100	0	0	0	3	8	0	0	0	0	0	64	10	59	17	11	0	0
GW810083	UNC10225473A	4-pyridinyl (with 2 aryl) _ortho-aryl_azoles	CN(C1CCOCC1)C(=O)c1ccc(cc1)-c1cc(ccn1)-c1c[nH]nc1-c1ccccn1	1	1	3	0	57	0	0	0	52	0	2	0	1	24	0	0	0	17	0	0	0	15	44	0	0	0	7	48	20	22	0	0	24	0	0	4	3	8	16	0	0	41	20	0	0	0
SB-733887	UNC10225474A	Imidazolopyridine	CCn1c(nc2cnccc12)-c1ccoc1	3	3	3	1	1	17	10	15	0	0	18	0	10	20	0	14	0	31	10	9	0	0	23	5	16	45	10	5	6	0	0	10	20	0	1	0	0	0	0	59	2	0	8	0	0	0
GW595885	UNC10225475A	Biphenylamide	COc1ccc(NC(=O)c2ccc(cc2)-c2cc(ccc2C)-c2nnc(C)o2)cc1	3	3	2	0	0	0	16	0	0	0	5	0	0	28	0	0	0	36	0	14	0	0	10	15	0	26	5	0	14	34	0	0	0	10	1	11	0	0	0	40	4	4	8	0	0	0
GW867588	UNC10225477A	2-aryl-4-anilino(pyridin-4-yl)-quinazoline and analogues	Cc1cccc(n1)-c1nc(Nc2ccc3ncsc3c2)c2ccccc2n1	2	2	2	7	0	0	20	15	35	0	2	0	0	0	12	0	0	0	19	0	0	0	15	20	22	8	0	0	0	11	0	0	15	0	7	0	0	0	0	47	26	21	14	0	0	0
GSK2635225	UNC10225478A	7-alkyl-5-aryl-4-aminopyrrolopyrimidine	Cn1cc(-c2ccc3N(CCc3c2)C(=O)Cc2cc(F)cc(c2)C(F)(F)F)c2c(N)ncnc12	11	16	19	10	78	15	40	0	0	0	12	0	17	10	0	0	0	0	3	21	25	15	0	0	20	56	54	94	23	40	0	0	0	15	0	44	0	5	0	11	5	41	11	0	0	0
GW856805	UNC10225479A	4-anilinoquinoline	Cc1ccc(O)cc1Nc1ccnc2ccc(cc12)C(C)(C)C	24	26	30	10	98.1	99.6	90.2	24	24	8	62	1	0	88	27	29	18	44	8	19	7	0	1	32	30	36	24	42	9	95.1	16	79	33	19	63	91.4	5	20	0	30	45	29	28	0	7	10
GW876731	UNC10225480A	2-aryl-4-anilino(pyridin-4-yl)-quinazoline and analogues	Cc1cccc(n1)-c1nc(Nc2ccc3n(C)ncc3c2)c2ccccc2n1	6	6	6	0	0	0	0	0	64	2	0	0	8	4	21	0	20	0	0	17	16	5	0	10	24	6	0	25	0	0	1	0	1	7	0	0	0	2	0	34	10	0	0	0	0	8
GSK1660437	UNC10225481A	4-pyrimidinyl_ortho-aryl_azoles	CC(C)c1nc(c(s1)-c1ccnc(Nc2ccc(nc2)N2CCN(CC2)C(C)=O)n1)-c1cccc(NS(=O)(=O)c2cccc(Cl)c2)c1	42	57	75	0	95.8	35	83	61	70	29	72	44	73	72	0	5	0	7	48	75	7	0	0	2	0	0	10	68	24	91.4	0	97.1	0	56	99.3	91.8	0	2	36	91	34	0	12	0	0	0
SB-428218	UNC10225482A	4-pyridinyl_ortho-aryl_azoles	Cl.Oc1ccc(cc1)-c1nc([nH]c1-c1ccncc1)-c1ccccc1	2	3	7	7	72	56	30	7	0	0	13	0	5	82	0	18	0	44	0	0	10	62	24	0	0	32	0	0	0	58	0	0	20	0	60	26	0	0	21	93	2	24	0	2	0	0
GI261656	UNC10225483A	4-anilinoquinoline	Cl.COc1cc2nccc(Nc3ccc(Oc4ccccc4)cc3)c2cc1OC	18	22	26	6	89	14	16	0	0	0	0	0	5	40	0	0	0	4	0	0	0	7	0	0	22	17	0	10	6	99.2	0	0	7	36	0	96.1	0	0	93.3	31	20	23	2	0	0	0
GW578342	UNC10225484A	4-anilinoquinoline	CN1CCN(Cc2cccc(c2)-c2ccc3c(Nc4ccc(Oc5ccccc5)cc4)ccnc3c2)CC1	18	22	23	10	91.6	20	23	0	0	0	0	0	8	9	0	11	0	23	8	0	6	0	0	0	6	0	9	17	1	94.8	0	0	8	20	0	90.2	0	1	90.8	35	27	10	7	0	1	0
SKF-105561	UNC10225486A	4-pyridinyl_ortho-aryl_azoles	CSc1ccc(cc1)-c1nc2CCCn2c1-c1ccncc1	0	1	3	0	16	0	12	5	4	0	2	21	0	0	6	0	6	8	0	0	0	0	12	17	10	0	0	0	16	4	0	6	1	0	7	1	0	0	0	90	0	0	15	0	0	0
GW827654	UNC10225487A	2,4-dianilinopyrimidine	Cl.CN(c1ccc(NC(=O)Nc2ccc(CN3CCN(C)CC3)cc2)cc1)c1ccnc(Nc2ccc(CS(C)(=O)=O)cc2)n1	67	87	101	62	100	94.2	81	58	0	0	38	57	0	34	0	0	0	47	34	34	80	8	0	4	99.9	99.7	98.5	99.3	93.2	94.1	44	96.2	87	69	0	8	19	10	60	51	28	42	27	23	0	0
GW275568	UNC10225488A	4-anilino-quinazoline and analogues	Cl.C(c1ccccc1)n1ccc2cc(Nc3ncnc4ccccc34)ccc12	3	5	5	17	0	30	0	10	0	2	16	0	24	4	3	12	0	0	11	0	43	29	1	0	17	30	0	0	13	0	0	0	13	18	0	0	0	20	0	0	24	34	27	8	9	0
GSK2291363	UNC10225489A	3-Amino-6-aryl-indazole	C[C@@H]1CC[C@@H](CN1c1cc(nc(N)n1)-c1ccc2c(N)n[nH]c2c1)C(=O)NC1CCCCC1	7	8	11	55	5	0	20	0	0	0	0	0	22	49	0	11	0	29	7	14	20	6	9	7	0	24	69	4	78	52	0	0	0	21	5	27	0	10	0	48	35	2	29	22	4	16
GSK2634758	UNC10225490A	7-alkyl-5-aryl-4-aminopyrrolopyrimidine	Cc1ccc(CC(=O)N2CCc3cc(ccc23)-c2cn(C)c3ncnc(N)c23)cc1	13	18	23	33	42	5	24	0	20	0	0	0	6	9	0	1	30	0	0	29	23	37	3	0	8	96.1	47	98.8	16	31	0	0	0	12	0	78	2	0	15	12	7	0	19	23	0	0
GW813349	UNC10225491A	benzimidazole_N-thiophenes	Cc1ccccc1COc1cc(sc1C(N)=O)-n1cnc2cc(Cl)ccc12	3	5	6	2	9	14	13	0	0	10	19	3	12	0	0	3	6	23	0	3	26	0	18	0	26	2	31	2	20	18	0	12	26	1	6	0	0	2	18	0	0	0	5	0	0	0
GSK1379882	UNC10225492A	2-anilino-4-aminopyrimidine	Fc1ccc(Nc2nccc(NCCNC(=O)Nc3ccc4OCOc4c3)n2)cc1	4	4	3	20	0	0	0	0	0	0	0	0	9	23	0	0	0	24	0	2	18	11	14	0	28	0	36	0	17	7	0	10	0	7	0	0	11	0	0	18	20	0	9	0	0	0
SB-282975	UNC10225493A	4-pyrimidinyl_ortho-aryl_azoles	Cl.Cc1nccc(n1)-c1c(ncn1CCCN1CCOCC1)-c1ccc(F)cc1	7	9	11	0	26	0	22	5	36	53	7	19	37	0	28	0	0	9	0	0	33	0	7	20	8	14	34	0	15	12	26	8	41	31	10	13	0	17	6	0	0	0	0	0	0	0
GSK2587663	UNC10225494A	4-amino-3-aryl-thienopyridine and analogues	Nc1nccc2scc(-c3ccc4N(CCc4c3)C(=O)Cc3cc(F)ccc3F)c12	1	2	2	0	0	0	18	0	0	0	0	0	24	35	0	17	0	8	0	11	1	0	6	13	0	8	35	41	10	54	0	0	0	23	3	32	4	0	0	45	29	27	21	4	0	0
GSK204559	UNC10225496A	benzimidazole_N-thiophenes	COc1cc2ncn(-c3cc(OCC4CCCCC4)c(s3)C(N)=O)c2cc1OC	6	11	13	55	0	0	14	5	0	18	32	0	11	11	0	0	0	22	0	27	14	0	14	8	0	13	60	0	90	33	0	0	5	10	0	8	30	45	0	17	13	6	16	11	0	0
GW320571	UNC10225497A	4-anilino-quinazoline and analogues	Cn1cncc1-c1ccc2ncnc(Nc3ccc(OCc4ccccc4)cc3)c2c1	9	10	12	2	0	10	10	22	2	16	16	23	27	15	0	20	10	21	35	20	0	72	16	7	0	100	38	10	23	13	17	0	0	28	3	15	0	0	0	26	23	11	23	16	0	0
GSK1558669	UNC10225498A	2,4-dianilinopyrimidine	Cl.COc1ccc(Nc2ncc(C#N)c(Nc3ccccc3C(N)=O)n2)cc1N1CCN(C)CC1	239	284	306	97.2	100	100	99.2	33	33	0	0	0	0	52	8	63	0	95.7	97.3	99.8	52	100	0	22	99.9	99.9	100	98.9	100	99.8	0	80	92	75	98.6	99.7	90.9	88	97.2	87	95.6	100	99.1	83	92.5	78
GW679395	UNC10225499A	4-pyridinyl (with 2 aryl) _ortho-aryl_azoles	Cc1cccc(c1)-c1cc(ccn1)-c1c[nH]nc1-c1ccccn1	0	1	4	14	68	29	48	0	0	0	3	0	3	22	0	1	0	30	0	0	0	0	5	0	8	15	0	0	0	32	0	2	1	0	8	4	0	0	0	28	7	5	10	0	0	0
GSK2593067	UNC10225500A	4-amino-3-aryl-thienopyridine and analogues	Nc1ncc(-c2cn[nH]c2)c2scc(-c3ccc4N(CCc4c3)C(=O)Cc3ccccc3)c12	27	38	45	52	99.2	81	89	0	0	0	16	0	0	0	0	2	0	0	11	16	1	26	5	21	13	98.6	87	98.8	67	96	0	0	0	31	0	96.1	0	0	0	11	33	0	11	19	0	0
GW608005	UNC10225501A	Biphenylamide	Cc1nnc(o1)-c1ccc(C)c(c1)-c1ccc(cc1)C(O)=O	1	1	2	0	0	0	0	4	0	0	0	0	0	0	0	6	0	1	0	0	0	11	0	0	0	0	6	0	0	31	0	0	0	0	0	0	2	8	0	17	2	8	4	0	0	0
GW823670	UNC10225502A	pyrrole-2-carboxamide	Clc1cccc(Cl)c1C(=O)c1c[nH]c(c1)C(=O)NCc1cccs1	1	1	1	0	18	27	0	0	12	0	0	5	0	0	0	0	0	0	8	0	0	0	19	0	0	9	1	0	19	28	7	0	15	0	0	0	0	0	0	0	0	0	0	0	0	0
GSK1307810	UNC10225503A	4-aryl-7-azaindole	OC(=O)C(F)(F)F.OC(=O)C(F)(F)F.NCCC(NC(=O)c1cc(Br)c(s1)-c1ccnc2[nH]ccc12)c1ccccc1	45	65	80	66	0	0	8	15	43	0	0	0	52	60	91.6	52	87	50	52	34	0	18	15	11	87	13	99.7	76	100	0	0	0	52	25	0	34	1	19	24	68	43	52	34	21	34	0
GW282450	UNC10225504A	4-anilino-quinazoline and analogues	Cl.COc1cc2ncnc(Nc3ccc4nc([nH]c4c3)-c3ccccc3)c2cc1OC	4	5	6	6	0	0	5	0	0	0	0	0	10	16	0	0	0	0	0	0	16	0	0	0	99.1	28	48	23	14	26	0	0	0	10	0	0	0	0	0	6	29	0	20	0	0	0
SKF-31736	UNC10243858A	6-aminopurines and related	CN(C)c1ncnc2nc[nH]c12	0	0	0	30	38	27	0	1	0	0	0	0	0	19	0	0	0	0	0	0	0	0	0	0	12	54	0	0	0	0	0	7	46	0	9	0	0	0	0	40	0	0	0	8	12	0
GSK2286062	UNC10243859A	3-Amino-6-aryl-indazole	C[C@@H]1CC[C@H](CN1c1cc(nc(N)n1)-c1ccc2c(N)n[nH]c2c1)C(=O)Nc1ccccc1	0	0	0	18	0	0	2	0	0	0	0	0	29	14	0	7	0	0	13	0	3	19	0	2	4	16	26	0	9	0	0	0	0	24	0	3	0	0	0	16	28	0	23	6	0	0
GSK2336394	UNC10243860A	morpholino-imidazo-pyrimidinones	[2H]C([2H])(c1cccc(c1C)C(F)(F)F)n1ccn2c1cc(nc2=O)N1CCOCC1	1	1	2	0	0	0	17	0	0	0	1	31	8	28	0	0	0	17	0	15	0	0	1	0	0	11	13	8	23	25	1	0	0	9	44	18	7	0	0	52	0	26	0	0	0	0
GSK2289044	UNC10243861A	morpholino-imidazo-pyrimidinones	Cc1c(Cn2ccn3c2nc(cc3=O)N2CCOCC2)cccc1C(F)(F)F	3	6	7	16	0	0	0	3	0	0	0	0	32	0	0	19	86	5	23	17	6	9	4	7	7	0	3	7	0	0	0	0	0	38	0	0	0	0	0	0	0	0	7	13	83	79
SKF-18355	UNC10243862A	6-aminopurines and related	CNc1ncnc2[nH]ncc12	1	2	2	0	34	11	0	0	4	4	40	0	0	10	0	0	4	0	0	0	0	0	0	0	2	34	0	0	0	0	6	0	35	0	11	0	0	0	0	20	0	0	0	0	0	0
AH5015	UNC10243863A	6-aminopurines and related	Nc1ncnc2[nH]c(nc12)-c1ccccc1	11	11	13	0	7	44	19	37	0	7	0	0	25	12	0	9	0	33	2	17	14	0	5	20	100	24	14	0	24	10	0	0	0	20	6	16	1	0	1	38	0	29	13	0	0	0
GSK682037	UNC10243880A	5-Ar-indazole	OC(=O)C(F)(F)F.Cc1n[nH]c2ccc(cc12)-c1cc(OC[C@@H](N)Cc2c[nH]c3ccccc23)cnc1-c1ccoc1C	43	61	73	61	13	33	47	0	8	0	0	0	25	82	97	99.8	87	24	12	0	0	0	0	7	0	0	53	35	90.5	19	0	0	0	22	0	7	0	0	0	23	25	29	82	27	20	27
GSK2363608	UNC10243881A	morpholino-triazolo-pyrimidinones	CSc1nn2c(nc(cc2=O)N2CCOCC2)n1Cc1cccc(c1C)C(F)(F)F	3	3	5	25	0	0	17	14	0	0	0	0	0	22	0	13	0	31	2	0	10	8	0	7	1	29	0	4	0	9	0	0	0	0	5	10	4	0	0	0	13	0	19	11	0	0
GSK943949	UNC10244034A	Furazan_benzimidazoles	CCn1c(nc2c(nc(OC[C@H](N)c3ccccc3)cc12)C#CC(C)(C)O)-c1nonc1N	18	20	21	0	0	0	0	0	0	0	0	0	0	0	95.8	98.8	95.8	19	0	3	0	18	0	0	37	0	4	13	19	0	0	9	1	2	42	0	0	50	0	13	0	0	10	0	0	0
[truncated: 363 more columns]
