# Supplementary material for: Progress towards a public chemogenomic set for protein kinases and a call for contributions
Source: PLOS journal article supplement (doi:10.1371/journal.pone.0181585), 2017-08-02
Supplement: S5 (10.1371/journal.pone.0181585.s005) [file journal.pone.0181585.s005.pdf]

| <b>CompoundName</b> | <b>other name</b> | <b>Over_90%_1000nM</b> | <b>Meets S(35) &lt;0.04</b> |
|---------------------|-------------------|------------------------|-----------------------------|
| PFE-PKIS 40         |                   | 11                     | Y                           |
| PFE-PKIS 29         |                   | 8                      | Y                           |
| PFE-PKIS 35         |                   | 7                      | Y                           |
| UNC10225101A        |                   | 6                      | Y                           |
| UNC10225200A        |                   | 11                     | Y                           |
| PFE-PKIS 39         |                   | 11                     | Y                           |
| TPKI-69             |                   | 13                     | Y                           |
| UNC10225353A        |                   | 13                     | Y                           |
| UNC10225440A        |                   | 13                     | Y                           |
| UNC10224990A        |                   | 12                     | Y                           |
| UNC10225019A        |                   | 12                     | Y                           |
| UNC10225035A        |                   | 12                     | Y                           |
| UNC10225497A        |                   | 12                     | Y                           |
| UNC10225455A        |                   | 11                     | Y                           |
| UNC10243863A        |                   | 11                     | Y                           |
| PFE-PKIS 25         |                   | 10                     | Y                           |
| TPKI-64             |                   | 10                     | Y                           |
| UNC10225233A        |                   | 10                     | Y                           |
| UNC10225417A        |                   | 10                     | Y                           |
| PFE-PKIS 34         |                   | 9                      | Y                           |
| TPKI-110            |                   | 9                      | Y                           |
| TPKI-61             |                   | 9                      | Y                           |
| TPKI-66             |                   | 9                      | Y                           |
| UNC10225058A        |                   | 9                      | Y                           |
| UNC10225271A        |                   | 9                      | Y                           |
| UNC10225372A        |                   | 9                      | Y                           |
| UNC10225493A        |                   | 9                      | Y                           |
| TPKI-39             |                   | 8                      | Y                           |
| PFE-PKIS 32         |                   | 8                      | Y                           |
| PFE-PKIS 41         |                   | 8                      | Y                           |
| TPKI-65             |                   | 8                      | Y                           |
| TPKI-73             |                   | 8                      | Y                           |
| TPKI-98             |                   | 8                      | Y                           |
| UNC10225163A        |                   | 8                      | Y                           |
| UNC10225263A        |                   | 8                      | Y                           |
| UNC10225359A        |                   | 8                      | Y                           |
| GSK350559           |                   | 8                      | Y                           |
| PFE-PKIS 3          |                   | 7                      | Y                           |
| UNC10225116A        |                   | 7                      | Y                           |
| UNC10225489A        |                   | 7                      | Y                           |
| GW857175            |                   | 7                      | Y                           |

|              |            |   |   |
|--------------|------------|---|---|
| UNC10225279B | GW582764   | 7 | Y |
| UNC10225418A | SB-217360  | 7 | Y |
| UNC10225444A | SB-742352  | 7 | Y |
| TPKI-24      |            | 6 | Y |
| TPKI-27      |            | 6 | Y |
| TPKI-38      |            | 6 | Y |
| UNC10224985A | GSK1398467 | 6 | Y |
| UNC10225008A | GSK223675  | 6 | Y |
| UNC10225042A | GSK204919  | 6 | Y |
| UNC10225105A | GSK1379762 | 6 | Y |
| UNC10225115A | GW569716   | 6 | Y |
| UNC10225148A | GSK2286096 | 6 | Y |
| UNC10225274A | SB-222903  | 6 | Y |
| UNC10225480A | GW876731   | 6 | Y |
| PFE-PKIS 2   |            | 6 | Y |
| PFE-PKIS 44  |            | 6 | Y |
| TPKI-105     |            | 6 | Y |
| TPKI-107     |            | 6 | Y |
| TPKI-58      |            | 6 | Y |
| TPKI-62      |            | 6 | Y |
| TPKI-92      |            | 6 | Y |
| TPKI-95      |            | 6 | Y |
| UNC10225134A |            | 6 | Y |
| UNC10225182A |            | 6 | Y |
| UNC10225259A |            | 6 | Y |
| UNC10225300A |            | 6 | Y |
| UNC10225331A |            | 6 | Y |
| UNC10225443A |            | 6 | Y |
| UNC10225463A |            | 6 | Y |
| PFE-PKIS 9   |            | 5 | Y |
| TPKI-63      |            | 5 | Y |
| TPKI-72      |            | 5 | Y |
| TPKI-99      |            | 5 | Y |
| UNC10225006A |            | 5 | Y |
| UNC10225050A |            | 5 | Y |
| UNC10225256A |            | 5 | Y |
| UNC10225387B |            | 5 | Y |
| UNC10224992A | GSK1398471 | 5 | Y |
| UNC10225013A | GW440132   | 5 | Y |
| UNC10225091A | GW583340   | 5 | Y |
| UNC10225258A | SB-223132  | 5 | Y |
| UNC10225301A | GW560459   | 5 | Y |

|              |            |   |   |
|--------------|------------|---|---|
| UNC10225327A | GW855857   | 5 | Y |
| UNC10225386A | GW854278   | 5 | Y |
| UNC10112604A | GW574783   | 4 | Y |
| UNC10225052A | GSK1379761 | 4 | Y |
| UNC10225069A | GSK336313  | 4 | Y |
| UNC10225085A | GW273749   | 4 | Y |
| UNC10225141A | GW525701   | 4 | Y |
| UNC10225167A | GSK2286295 | 4 | Y |
| UNC10225205A | GSK1645895 | 4 | Y |
| UNC10225225A | GSK2328680 | 4 | Y |
| UNC10225227A | SB-284851  | 4 | Y |
| UNC10225230A | GW792479   | 4 | Y |
| UNC10225231A | GSK2297428 | 4 | Y |
| UNC10225238A | GSK190937  | 4 | Y |
| UNC10225260A | GSK1024306 | 4 | Y |
| UNC10225355A | GSK2269905 | 4 | Y |
| UNC10225360A | GI262866   | 4 | Y |
| UNC10225391A | GSK1379748 | 4 | Y |
| UNC10225435A | GSK2347225 | 4 | Y |
| UNC10225450A | GSK205189  | 4 | Y |
| TPKI-106     |            | 4 | Y |
| TPKI-85      |            | 4 | Y |
| TPKI-97      |            | 4 | Y |
| GW869979     |            | 4 | Y |
| TPKI-100     |            | 3 | Y |
| TPKI-101     |            | 3 | Y |
| TPKI-102     |            | 3 | Y |
| TPKI-103     |            | 3 | Y |
| TPKI-104     |            | 3 | Y |
| TPKI-60      |            | 3 | Y |
| SB-210486    |            | 3 | Y |
| TPKI-26      |            | 3 | Y |
| TPKI-28      |            | 3 | Y |
| UNC10112764A | GW824645   | 3 | Y |
| UNC10225018A | GSK2298859 | 3 | Y |
| UNC10225126A | GW869640   | 3 | Y |
| UNC10225127A | GSK1024304 | 3 | Y |
| UNC10225131A | GSK2296823 | 3 | Y |
| UNC10225178A | GSK2342769 | 3 | Y |
| UNC10225268A | GW659008   | 3 | Y |
| UNC10225319A | GW689066   | 3 | Y |
| UNC10225343A | GSK2297099 | 3 | Y |

|              |            |   |   |
|--------------|------------|---|---|
| UNC10225374A | GSK2224810 | 3 | Y |
| UNC10225388A | GSK1398472 | 3 | Y |
| UNC10225398A | GSK1398477 | 3 | Y |
| UNC10225445A | GSK1398475 | 3 | Y |
| UNC10225449A | GI230329   | 3 | Y |
| UNC10225488A | GW275568   | 3 | Y |
| UNC10225491A | GW813349   | 3 | Y |
| UNC10243861A | GSK2289044 | 3 | Y |
| UNC10243881A | GSK2363608 | 3 | Y |
| TPKI-16      |            | 2 | Y |
| UNC10224997A | GW872411   | 2 | Y |
| UNC10225005A | GSK2344444 | 2 | Y |
| UNC10225080A | GSK1379757 | 2 | Y |
| UNC10225109A | GW577382   | 2 | Y |
| UNC10225125A | GW684088   | 2 | Y |
| UNC10225140A | SB-743341  | 2 | Y |
| UNC10225143A | GSK2283293 | 2 | Y |
| UNC10225161A | GSK1379712 | 2 | Y |
| UNC10225202A | GSK2297542 | 2 | Y |
| UNC10225229A | GW868318   | 2 | Y |
| UNC10225239A | GW867587   | 2 | Y |
| UNC10225287A | GSK346294  | 2 | Y |
| UNC10225332A | GSK2297430 | 2 | Y |
| UNC10225339A | GSK429286  | 2 | Y |
| UNC10225403A | GSK2373690 | 2 | Y |
| UNC10225415A | GSK2334006 | 2 | Y |
| UNC10225422A | GW424170   | 2 | Y |
| UNC10225439A | GSK2333389 | 2 | Y |
| UNC10225468A | SB-517081  | 2 | Y |
| UNC10225477A | GW867588   | 2 | Y |
| PFE-PKIS 1   |            | 2 | Y |
| PFE-PKIS 12  |            | 2 | Y |
| PFE-PKIS 21  |            | 2 | Y |
| PFE-PKIS 43  |            | 2 | Y |
| TPKI-81      |            | 2 | Y |
| TPKI-91      |            | 2 | Y |
| UNC10225468A |            | 2 | Y |
| GSK2358994   |            | 2 | Y |
| TPKI-71      |            | 1 | Y |
| UNC10225002A |            | 1 | Y |
| TPKI-25      |            | 1 | Y |
| UNC10225030A | GSK2250882 | 1 | Y |

|              |            |   |   |
|--------------|------------|---|---|
| UNC10225056A | GSK1229782 | 1 | Y |
| UNC10225083A | GSK2258759 | 1 | Y |
| UNC10225170A | GW284543   | 1 | Y |
| UNC10225379A | GW867253   | 1 | Y |
| UNC10243860A | GSK2336394 | 1 | Y |
| UNC10112830A |            | 0 | Y |
| UNC10225088A |            | 0 | Y |
