# Supplementary material for: Progress towards a public chemogenomic set for protein kinases and a call for contributions
Source: PLOS journal article supplement (doi:10.1371/journal.pone.0181585), 2017-08-02
Supplement: S6 (10.1371/journal.pone.0181585.s006) [file journal.pone.0181585.s006.pdf]

| name of compound            | pub med ID                                |
|-----------------------------|-------------------------------------------|
| compound 13                 | 25415869                                  |
| 5 iodo tubericidin          | 23071153                                  |
| AC220, quizartinib          | 19654408                                  |
| AM-0216                     | 24980832                                  |
| AM-0561                     | 24980832                                  |
| AMG-706 motesanib           | 16951187                                  |
| AMG-900                     | 20935223                                  |
| Amgen compound 44           | 25587754                                  |
| Amgen compound 52           | 25587754                                  |
| AnnH75                      | 26192590                                  |
| AR-470                      | 20854944                                  |
| ARA014418                   | 12928438                                  |
| AZ compound 7b              | 24900749                                  |
| AZ compound 7h              | 26985319                                  |
| AZD-1208                    | 22727640                                  |
| AZD1152                     | 17495131                                  |
| AZD1775, MK1775             | 19887545                                  |
| AZD2014                     | 23375793                                  |
| B19 Gray lab                | 21802008                                  |
| Bafetinib, NS-187, INNO-406 | 16105974 & 21154127                       |
| BAY-61-3606                 | 22815993                                  |
| BAY320                      | 26885717                                  |
| BGJ-398 (Infigratinib)      | 21936542                                  |
| BI-2536                     | 17291758                                  |
| BI6727, volasertib          | 19383823                                  |
| BIBW-2992 (Afatinib)        | 18408761                                  |
| BIX-02188                   | 18834865                                  |
| BIX-02565                   | 22056746                                  |
| BLU9931                     | 25776529                                  |
| BMS-540215, brivanib        | 16570908                                  |
| BMX-IN-1                    | 23594111                                  |
| canertinib, CI-1033         | 10753475                                  |
| CCT244747                   | 22929806                                  |
| CCT245737                   | 26295308 and JMC 2016 epub ahead of print |
| CCT251545                   | 26502155                                  |
| CFI-400945                  | 25043604                                  |
| CGI1746                     | 21113169                                  |
| CHIR-99021                  | 12606497                                  |
| CHMFL-KIT-110               | 27077705                                  |
| CI-1040, PD184352           | 10395327                                  |
| Compound 10.HCl             | 23147077                                  |

|                                |                                         |
|--------------------------------|-----------------------------------------|
| compound 47 LJ1308; pan-RSK    | 26270416 & 24554780                     |
| compound 48                    | 26355916                                |
| CRT0105446                     | 26540348                                |
| CRUK naphthyridine compound 51 | 27326329                                |
| CX-4945, silmasertib           | 21159648 & 21174434                     |
| D4476                          | 14710188                                |
| DDR1-IN-1                      | 23899692                                |
| EHT5372                        | 25264830; 25556849; AACR poster as well |
| EMD 1214063, Tepotinib         | 23553846                                |
| ERK5-IN-1                      | 24239623                                |
| erlotinib, OSI-744             | 18183025                                |
| EW-7197                        | 24817629                                |
| FRAX1036                       | 25596744                                |
| FRAX597                        | 23960073                                |
| G-5555                         | 26713112                                |
| G1T28                          | 26826116                                |
| GDC-0879                       | 19276360 & 22037378                     |
| gefitinib, ZD1839              | 11585753                                |
| Genentech compound 13          | 26985305                                |
| Genentech compound 32          | 26985305                                |
| GNE7915                        | 22985112                                |
| GNF-5                          | 20072125                                |
| GS9973, entospletinib          | 24779514                                |
| GSK114                         | 27246618                                |
| GSK2334470                     | 21341675                                |
| GSK2656157                     | 24900593                                |
| GSK269962A                     | 17018693                                |
| GSK429286                      | 17201405                                |
| GSK461364A                     | 19690138                                |
| GW2580                         | 16249345                                |
| HG-10-102-01                   | 23066449                                |
| HS38                           | 24070067                                |
| ibrutinib, PCI-32765           | 20615965                                |
| IKK-2 inhibitor VIII           | 15225718                                |
| imatinib                       | 10910906                                |
| JH-II-127                      | 26005538                                |
| JH-IX-179                      | 27190596                                |
| JNK-IN-11                      | 22284361                                |
| JNK-IN-12                      | 22284361                                |
| JNK-IN-7                       | 22284361                                |
| JNK-IN-8                       | 22284361                                |
| Knapp et al compound 12g       | 25822739                                |

|                                                |                     |
|------------------------------------------------|---------------------|
| KU-60019                                       | 19808981            |
| lapatinib, GW2016                              | 12467226            |
| LIMKi, compound 3 and 4 in Mol Canc Ther paper | 19001433            |
| LIMKi, compound 3 in Mol Canc Ther paper       | 26540348            |
| LY-317615, enzastaurin                         | 16103100            |
| LY2857785                                      | 24688048            |
| LY3009120                                      | 25965804 & 26343583 |
| masitinib AB1010                               | 19789626            |
| MELK-T1, compound 7 Astex Janssen              | 25589925            |
| Merck amidopyrazole compound 32                | 26101573            |
| Merck compound 14                              | 26101574            |
| MK-5108, VX-689                                | 20053775            |
| MK2206                                         | 20571069            |
| ML281                                          | 23256033            |
| ML315                                          | 23642479            |
| Mli-2                                          | 26407721            |
| MLN-120B                                       | 16439676            |
| MLN-518, Tandutinib                            | 12124172            |
| MLN-8054                                       | 17360485            |
| Mps-BAY2a                                      | 23933817            |
| MSC 2032964A                                   | 21064192            |
| ND-2110                                        | 26621451            |
| ND-2158                                        | 26621451            |
| Novartis compound 11                           | 25633741            |
| NVS-MELK8a                                     | 27187609            |
| NVS-PAK1-1                                     | 26191365            |
| OSI compound 13f                               | 23856049            |
| OSI-906, linsitinib                            | 21425998            |
| P505-15 (PRT062607)                            | 22040680            |
| palbociclib                                    | 15542782            |
| PD 0325901                                     | 18952427            |
| PF-4708671                                     | 20704563            |
| PF-477736                                      | 18723486            |
| PF3644022                                      | 20237073            |
| PIM447                                         | 26505898            |
| PLX-4720; Vemurafenib                          | 18287029            |
| PTK-787, vatalanib                             | 15742376            |
| RAF-265, CHIR-265                              | 20124452            |
| ribociclib                                     | 26390342            |
| Roche compound 17                              | 23664880            |
| Roche compound 24f                             | 23352510            |
| SB-203580                                      | 10702313            |

|                                     |                      |
|-------------------------------------|----------------------|
| SB-590885                           | 17145850             |
| SCH772984                           | 23614898 & 25195011  |
| Scripps compound 35                 | 20684608             |
| selumetinib (AZD6244, ARRY886)      | 17332304 & 17699718  |
| SGK1 Sanofi 14n                     | 25589934             |
| SGK1 Sanofi ex.290-R                | patent - WO201414006 |
| SGX-523                             | 19934279             |
| Shionogi 19c                        | 25801152             |
| Shionogi 27f                        | 25625617             |
| skepinone-L                         | 22198732             |
| SR-3029                             | 23787102             |
| St Jude compound 27g                | 26632965             |
| Sunesis Biogen Idec                 | 21118801             |
| TAK960                              | 22188812             |
| THZ1                                | 25043025             |
| THZ531                              | 27571479             |
| Tofacitinib, tasocitinib, CP-690550 | 14593182             |
| Trametinib (GSK1120212)             | 23237773 & 24900312  |
| TX-85-1                             | 25326665             |
| VE-821                              | 21490603             |
| VER-246608                          | 25404640             |
| Vertex 11e                          | 19827834             |
| VX-745                              | 18183025 & 24900264  |
| WNK463                              | 27595330             |
| WZ4003, HTH-01-015                  | 24171924             |
| XL-413                              | 22560567             |
| XMD8-92                             | 20832753             |
