# Supplementary material for: Progress towards a public chemogenomic set for protein kinases and a call for contributions
Source: PLOS journal article supplement (doi:10.1371/journal.pone.0181585), 2017-08-02
Supplement: S7 (10.1371/journal.pone.0181585.s007) [file journal.pone.0181585.s007.pdf]

| approved symbol | status | assay? | covered | covered by PKIS | covered by PKIS2 | covered by literature |
|-----------------|--------|--------|---------|-----------------|------------------|-----------------------|
| AXL             | kinase | yes    | y       | no              | no               | yes                   |
| BMP2K           | kinase | yes    | y       | no              | no               | yes                   |
| ICK             | kinase | yes    | y       | no              | no               | yes                   |
| PAK3            | kinase | yes    | y       | no              | no               | yes                   |
| SIK2            | kinase | yes    | y       | no              | no               | yes                   |
| SLK             | kinase | yes    | y       | no              | no               | yes                   |
| STK35           | kinase | yes    | y       | no              | no               | yes                   |
| WNK2            | kinase | yes    | y       | no              | no               | yes                   |
| RPS6KA2         | kinase | yes    | y       | no              | no               | yes                   |
| AAK1            | kinase | yes    | y       | no              | no               | yes                   |
| ABL2            | kinase | yes    | y       | no              | no               | yes                   |
| ACVR1           | kinase | yes    | y       | no              | no               | yes                   |
| ARAF            | kinase | yes    | y       | no              | no               | yes                   |
| ATM             | kinase | yes    | y       | no              | no               | yes                   |
| ATR             | kinase | yes    | y       | no              | no               | yes                   |
| BMX             | kinase | yes    | y       | no              | no               | yes                   |
| BTK             | kinase | yes    | y       | no              | no               | yes                   |
| CAMK1           | kinase | yes    | y       | no              | no               | yes                   |
| CAMK2G          | kinase | yes    | y       | no              | no               | yes                   |
| CAMKK1          | kinase | yes    | y       | no              | no               | yes                   |
| CAMKK2          | kinase | yes    | y       | no              | no               | yes                   |
| CDC42BPG        | kinase | yes    | y       | no              | no               | yes                   |
| CDC7            | kinase | yes    | y       | no              | no               | yes                   |
| CDK11B          | kinase | yes    | y       | no              | no               | yes                   |
| CDK12           | kinase | yes    | y       | no              | no               | yes                   |
| CDK13           | kinase | yes    | y       | no              | no               | yes                   |
| CDK19           | kinase | yes    | y       | no              | no               | yes                   |
| CDK7            | kinase | yes    | y       | no              | no               | yes                   |
| CDK8            | kinase | yes    | y       | no              | no               | yes                   |
| CDK9            | kinase | yes    | y       | no              | no               | yes                   |
| CDKL5           | kinase | yes    | y       | no              | no               | yes                   |
| CHEK1           | kinase | yes    | y       | no              | no               | yes                   |
| CHEK2           | kinase | yes    | y       | no              | no               | yes                   |
| CLK4            | kinase | yes    | y       | no              | no               | yes                   |
| DAPK1           | kinase | yes    | y       | no              | no               | yes                   |
| DAPK2           | kinase | yes    | y       | no              | no               | yes                   |
| DCLK2           | kinase | yes    | y       | no              | no               | yes                   |
| DYRK1B          | kinase | yes    | y       | no              | no               | yes                   |
| DYRK3           | kinase | yes    | y       | no              | no               | yes                   |
| EIF2AK3         | kinase | yes    | y       | no              | no               | yes                   |

|          |              |     |   |    |    |     |
|----------|--------------|-----|---|----|----|-----|
| EIF2AK4  | pseudokinase | yes | y | no | no | yes |
| EPHB1    | kinase       | yes | y | no | no | yes |
| EPHB4    | kinase       | yes | y | no | no | yes |
| FES      | kinase       | yes | y | no | no | yes |
| FGFR2    | kinase       | yes | y | no | no | yes |
| FGFR3    | kinase       | yes | y | no | no | yes |
| FGFR4    | kinase       | yes | y | no | no | yes |
| FGR      | kinase       | yes | y | no | no | yes |
| FYN      | kinase       | yes | y | no | no | yes |
| HIPK2    | kinase       | yes | y | no | no | yes |
| HIPK3    | kinase       | yes | y | no | no | yes |
| HIPK4    | kinase       | yes | y | no | no | yes |
| IRAK1    | kinase       | yes | y | no | no | yes |
| IRAK3    | kinase       | yes | y | no | no | yes |
| IRAK4    | kinase       | yes | y | no | no | yes |
| LIMK1    | kinase       | yes | y | no | no | yes |
| LIMK2    | kinase       | yes | y | no | no | yes |
| LYN      | kinase       | yes | y | no | no | yes |
| MAP2K2   | kinase       | yes | y | no | no | yes |
| MAP2K4   | kinase       | yes | n | no | no | yes |
| MAP3K1   | kinase       | yes | y | no | no | yes |
| MAP3K14  | kinase       | yes | y | no | no | yes |
| MAP3K20  | kinase       | yes | y | no | no | yes |
| MAP3K7   | kinase       | yes | y | no | no | yes |
| MAP3K9   | kinase       | yes | y | no | no | yes |
| MAP4K3   | kinase       | yes | y | no | no | yes |
| MAPK1    | kinase       | yes | y | no | no | yes |
| MAPK12   | kinase       | yes | y | no | no | yes |
| MAPK13   | kinase       | yes | y | no | no | yes |
| MAPK6    | kinase       | yes | y | no | no | yes |
| MAPK7    | kinase       | yes | y | no | no | yes |
| MAPKAPK2 | kinase       | yes | y | no | no | yes |
| MAPKAPK3 | kinase       | yes | y | no | no | yes |
| MAPKAPK5 | kinase       | yes | y | no | no | yes |
| MARK2    | kinase       | yes | y | no | no | yes |
| MERTK    | kinase       | yes | y | no | no | yes |
| MYLK4    | kinase       | yes | y | no | no | yes |
| NEK10    | kinase       | yes | y | no | no | yes |
| NEK2     | kinase       | yes | y | no | no | yes |
| NEK6     | kinase       | yes | y | no | no | yes |
| NTRK2    | kinase       | yes | y | no | no | yes |
| NUAK2    | kinase       | yes | y | no | no | yes |

|         |        |     |   |    |    |     |
|---------|--------|-----|---|----|----|-----|
| PAK1    | kinase | yes | y | no | no | yes |
| PAK2    | kinase | yes | y | no | no | yes |
| PAK4    | kinase | yes | y | no | no | yes |
| PAK5    | kinase | yes | y | no | no | yes |
| PDK1    | kinase | yes | y | no | no | yes |
| PDK2    | kinase | yes | y | no | no | yes |
| PDK3    | kinase | yes | y | no | no | yes |
| PDK4    | kinase | yes | y | no | no | yes |
| PHKG1   | kinase | yes | y | no | no | yes |
| PIM2    | kinase | yes | y | no | no | yes |
| PIM3    | kinase | yes | y | no | no | yes |
| PKN2    | kinase | yes | y | no | no | yes |
| PLK4    | kinase | yes | y | no | no | yes |
| PRKAA2  | kinase | yes | y | no | no | yes |
| PRKCA   | kinase | yes | y | no | no | yes |
| PRKCB   | kinase | yes | y | no | no | yes |
| PRKCD   | kinase | yes | y | no | no | yes |
| PRKCE   | kinase | yes | y | no | no | yes |
| PRKCG   | kinase | yes | y | no | no | yes |
| PRKCQ   | kinase | yes | y | no | no | yes |
| PTK2    | kinase | yes | y | no | no | yes |
| PTK6    | kinase | yes | y | no | no | yes |
| RAF1    | kinase | yes | y | no | no | yes |
| RPS6KA1 | kinase | yes | y | no | no | yes |
| RPS6KA3 | kinase | yes | y | no | no | yes |
| RPS6KA4 | kinase | yes | y | no | no | yes |
| RPS6KA5 | kinase | yes | y | no | no | yes |
| RPS6KA6 | kinase | yes | y | no | no | yes |
| RPS6KB2 | kinase | yes | y | no | no | yes |
| SBK1    | kinase | yes | y | no | no | yes |
| SGK1    | kinase | yes | y | no | no | yes |
| SRC     | kinase | yes | y | no | no | yes |
| STK16   | kinase | yes | y | no | no | yes |
| STK24   | kinase | yes | y | no | no | yes |
| STK25   | kinase | yes | y | no | no | yes |
| STK26   | kinase | yes | y | no | no | yes |
| STK33   | kinase | yes | y | no | no | yes |
| SYK     | kinase | yes | y | no | no | yes |
| TBK1    | kinase | yes | y | no | no | yes |
| TEK     | kinase | yes | y | no | no | yes |
| TNIK    | kinase | yes | y | no | no | yes |
| TNK2    | kinase | yes | y | no | no | yes |

|               |               |            |          |           |           |            |
|---------------|---------------|------------|----------|-----------|-----------|------------|
| <b>TNNI3K</b> | <b>kinase</b> | <b>yes</b> | <b>y</b> | <b>no</b> | <b>no</b> | <b>yes</b> |
| <b>ULK1</b>   | <b>kinase</b> | <b>yes</b> | <b>y</b> | <b>no</b> | <b>no</b> | <b>yes</b> |
| <b>ULK2</b>   | <b>kinase</b> | <b>yes</b> | <b>y</b> | <b>no</b> | <b>no</b> | <b>yes</b> |
| <b>WEE1</b>   | <b>kinase</b> | <b>yes</b> | <b>y</b> | <b>no</b> | <b>no</b> | <b>yes</b> |
| <b>WNK1</b>   | <b>kinase</b> | <b>yes</b> | <b>y</b> | <b>no</b> | <b>no</b> | <b>yes</b> |
| <b>WNK3</b>   | <b>kinase</b> | <b>yes</b> | <b>y</b> | <b>no</b> | <b>no</b> | <b>yes</b> |
| <b>WNK4</b>   | <b>kinase</b> | <b>yes</b> | <b>y</b> | <b>no</b> | <b>no</b> | <b>yes</b> |
| <b>ZAP70</b>  | <b>kinase</b> | <b>yes</b> | <b>y</b> | <b>no</b> | <b>no</b> | <b>yes</b> |
