# Supplementary material for: Progress towards a public chemogenomic set for protein kinases and a call for contributions
Source: PLOS journal article supplement (doi:10.1371/journal.pone.0181585), 2017-08-02
Supplement: S8 (10.1371/journal.pone.0181585.s008) [file journal.pone.0181585.s008.pdf]

| approved symbol | status       | assay? | covered | HGNC ID    | synonyms                                                                                         |
|-----------------|--------------|--------|---------|------------|--------------------------------------------------------------------------------------------------|
| AATK            | kinase       | no     | n       | HGNC:21    | AATYK, KIAA0641, LMTK1, LMR1, AATYK1, PPP1R77                                                    |
| ACVR1C          | kinase       | yes    | n       | HGNC:18123 | ALK7, ACVRLK7                                                                                    |
| ACVR2A          | kinase       | yes    | n       | HGNC:173   | ACTRII, ACTR2                                                                                    |
| ACVR2B          | kinase       | yes    | n       | HGNC:174   | ActR-IIB, ACTR2B                                                                                 |
| ADCK1           | kinase       | no     | n       | HGNC:19038 | FLJ39600                                                                                         |
| ADCK2           | kinase       | no     | n       | HGNC:19039 | MGC20727                                                                                         |
| ADCK5           | kinase       | no     | n       | HGNC:21738 | FLJ35454                                                                                         |
| ALK             | kinase       | yes    | n       | HGNC:427   | CD246                                                                                            |
| ALPK1           | kinase       | no     | n       | HGNC:20917 | Lak, FLJ22670, KIAA1527, AlphaK3                                                                 |
| ALPK2           | kinase       | no     | n       | HGNC:20565 | HAK, AlphaK2                                                                                     |
| ALPK3           | kinase       | no     | n       | HGNC:17574 | MAK, KIAA1330, Midori, AlphaK1                                                                   |
| AMHR2           | kinase       | no     | n       | HGNC:465   | MISR2, MISRII                                                                                    |
| ANKK1           | kinase       | yes    | n       | HGNC:21027 | X-kinase, SgK288                                                                                 |
| BCKDK           | kinase       | no     | n       | HGNC:16902 | BDK; BCKDKD                                                                                      |
| BCR             | kinase       | no     | n       | HGNC:1014  | ALL; CML; PHL; BCR1; D22S11; D22S662                                                             |
| BMPR2           | kinase       | yes    | n       | HGNC:1078  | BRK-3, T-ALK, BMPR3, BMPR-II                                                                     |
| BUB1B           | kinase       | yes    | n       | HGNC:1149  | BUBR1, MAD3L, Bub1A, SSK1                                                                        |
| CAMK1D          | kinase       | yes    | n       | HGNC:19341 | CKLiK; CaM-K1; CaMKID, CaMK1d                                                                    |
| CAMK1G          | kinase       | yes    | n       | HGNC:14585 | VWS1, CLICKIII, dJ272L16.1, CaMK1g                                                               |
| CAMK2A          | kinase       | yes    | n       | HGNC:1460  | KIAA0968, CaMKIINalpha, CAMKA, CaMK2a                                                            |
| CAMK2B          | kinase       | yes    | n       | HGNC:1461  | CAM2, CAMK2, CAMKB, CaMK2b                                                                       |
| CAMK2D          | kinase       | yes    | n       | HGNC:1462  | CAMKD, CaMK2d                                                                                    |
| CAMK4           | kinase       | yes    | n       | HGNC:1464  | CaMK-GR,caMK; CaMK IV; CaMK4                                                                     |
| CAMKV           | pseudokinase | no     | n       | HGNC:28788 | MGC8407, VACAMKL                                                                                 |
| CDK1            | kinase       | yes    | n       | HGNC:1722  | CDC28A, CDC2, P34CDC2                                                                            |
| CDK10           | kinase       | yes    | n       | HGNC:1770  | PISSLRE                                                                                          |
| CDK11A          | kinase       | yes    | n       | HGNC:1730  | CDC2L2; CDC2L3; p58GTA; PITSLRE; CDK11-p46; CDK11-p58; CDK11-p110                                |
| CDK11B          | kinase       | yes    | n       |            | p58; PK58; CDK11; CLK-1; CDC2L1; PITSLREA; p58CLK-1; CDK11-p46; CDK11-p58; p58CDC2L1; CDK11-p110 |
| CDK14           | kinase       | yes    | n       | HGNC:8883  | PFTAIRE1, PFTK1                                                                                  |
| CDK15           | kinase       | yes    | n       | HGNC:14434 | PFTAIRE2, ALS2CR7, PFTK2                                                                         |
| CDK16           | kinase       | yes    | n       | HGNC:8749  | PCTAIRE, PCTAIRE1, PCTGAIRE, FLJ16665, PCTK1                                                     |
| CDK17           | kinase       | yes    | n       | HGNC:8750  | PCTAIRE2, PCTK2                                                                                  |
| CDK18           | kinase       | yes    | n       | HGNC:8751  | PCTAIRE3, PCTK3                                                                                  |
| CDK20           | kinase       | yes    | n       | HGNC:21420 | p42, CCRK; CDCH; PNQALRE                                                                         |
| CDK5            | kinase       | yes    | n       | HGNC:1774  | PSSALRE                                                                                          |
| CDKL1           | kinase       | yes    | n       | HGNC:1781  | KKIALRE, P42                                                                                     |
| CDKL3           | kinase       | yes    | n       | HGNC:15483 | NKIAMRE                                                                                          |
| CDKL4           | kinase       | no     | n       | HGNC:19287 |                                                                                                  |
| CHUK            | kinase       | yes    | n       | HGNC:1974  | IKK1, IKK-alpha, IkbKA, NFKBIKA, IKKA, IKBKA, TCF16, IKKa                                        |
| COQ8A           | kinase       | yes    | n       | HGNC:16812 | COQ8, SCAR9, ADCK3; ARCA2; CAB1; COQ10D4                                                         |
| COQ8B           | kinase       | yes    | n       | HGNC:19041 | FLJ12229, COQ8, ADCK4, NPHS9                                                                     |
| CSK             | kinase       | yes    | n       | HGNC:2444  |                                                                                                  |
| CSNK1A1L        | kinase       | yes    | n       | HGNC:20289 | MGC33182, CK1a2, CK1 alpha 1L                                                                    |
| CSNK1G1         | kinase       | yes    | n       | HGNC:2454  | CK1gamma1, CK1g1                                                                                 |
| CSNK1G2         | kinase       | yes    | n       | HGNC:2455  | CK1g2                                                                                            |
| CSNK1G3         | kinase       | yes    | n       | HGNC:2456  | CKI-gamma 3L, CSNK1G3, CK1g3                                                                     |
| DCLK1           | kinase       | yes    | n       | HGNC:2700  | KIAA0369, DCLK, DCDC3A, CL1, CLICK1, DCAMKL1                                                     |
| DMPK            | kinase       | yes    | n       | HGNC:2933  | DMK, DM1PK, MDPK, MT-PK, DM, DM1, DMPK1<br>KIAA0472, DustyPK, CAKUT1, HDCMD38P, RIP5, RIPK5,     |
| DSTYK           | kinase       | yes    | n       | HGNC:29043 | SgK496                                                                                           |
| DYRK4           | kinase       | yes    | n       | HGNC:3095  |                                                                                                  |
| EEF2K           | kinase       | yes    | n       | HGNC:24615 | eEF-2K, HSU93850                                                                                 |
| EIF2AK1         | kinase       | yes    | n       | HGNC:24921 | HRI, KIAA1369, HCR                                                                               |
| EIF2AK2         | kinase       | yes    | n       | HGNC:9437  | PKR, EIF2AK1, PPP1R83, PRKR                                                                      |

|         |              |     |   |            |                                                                                                  |
|---------|--------------|-----|---|------------|--------------------------------------------------------------------------------------------------|
| EPHA1   | kinase       | yes | n | HGNC:3385  | EPH, EPHT, EPHT1                                                                                 |
| EPHA10  | pseudokinase | no  | n | HGNC:19987 | FLJ16103, FLJ33655, EphA10                                                                       |
| EPHA3   | kinase       | yes | n | HGNC:3387  | EK4, ETK, ETK1, HEK, HEK4, TYRO4                                                                 |
| EPHA4   | kinase       | yes | n | HGNC:3388  | SEK; HEK8; TYRO1                                                                                 |
| EPHA5   | kinase       | yes | n | HGNC:3389  | Hek7, TYRO4, CEK7, EHK1, Els1, Rek7, bsk                                                         |
| EPHA6   | kinase       | yes | n | HGNC:19296 | FLJ35246, EHK-2, EHK2, EK12, EPA6, HEK12, PRO57066                                               |
| EPHA7   | kinase       | yes | n | HGNC:3390  | Hek11, EHK-3, EHK3, EK11, HEK11                                                                  |
| EPHA8   | kinase       | yes | n | HGNC:3391  | Hek3, EEK, EK3, HEK3                                                                             |
| EPHB2   | kinase       | yes | n | HGNC:3393  | Hek5, Tyro5, CAPB, DRT, EK5, EPHT3, ERK, PCBC                                                    |
| EPHB3   | kinase       | yes | n | HGNC:3394  | EK2, ETK2, HEK2, TYRO6                                                                           |
| ERN1    | kinase       | yes | n | HGNC:3449  | IRE1; IRE1P; IRE1a; hIRE1p                                                                       |
| ERN2    | kinase       | yes | n | HGNC:16942 | IRE1-BETA, IRE1b, IRE2p, hIRE2p, IRE2                                                            |
| FASTK   | kinase       | yes | n | HGNC:24676 | FAST                                                                                             |
| FER     | kinase       | yes | n | HGNC:3655  | PPP1R74, TYK3, p94-Fer                                                                           |
| FRK     | kinase       | yes | n | HGNC:3955  | RAK, GTK, PTK5                                                                                   |
| GRK1    | kinase       | yes | n | HGNC:10013 | GPRK1, RHOK, RK                                                                                  |
| GRK2    | kinase       | yes | n | HGNC:289   | ADRBK1, BARK1, BETA-ARK1                                                                         |
| GRK3    | kinase       | yes | n | HGNC:290   | ADRBK2, BARK2                                                                                    |
| GRK4    | kinase       | yes | n | HGNC:4543  | GPRK2L, GPRK4a, IT11, GRK4, GPRK4                                                                |
| GRK5    | kinase       | yes | n | HGNC:4544  | GPRK5                                                                                            |
| GRK6    | kinase       | yes | n | HGNC:4545  | GPRK6                                                                                            |
| GRK7    | kinase       | yes | n | HGNC:17031 | GPRK7                                                                                            |
| GUCY2C  | pseudokinase | no  | n | HGNC:4688  | DIAR6, GUC2C, MECIL, MUCIL, STAR, HSER<br>CORD5, CORD6, CYGD, GUC1A4, GUC2D, LCA, LCA1, RCD2,    |
| GUCY2D  | pseudokinase | no  | n | HGNC:4689  | RETGC-1, ROS-GC1, ROSGC, retGC                                                                   |
| GUCY2F  | pseudokinase | no  | n | HGNC:4691  | CYGF, GC-F, GUC2DL, GUC2F, RETGC-2, ROS-GC2                                                      |
| HCK     | kinase       | yes | n | HGNC:4840  | JTK9, p59Hck, p61Hck                                                                             |
| HUNK    | kinase       | yes | n | HGNC:13326 |                                                                                                  |
| ILK     | pseudokinase | no  | n | HGNC:6040  | HEL-S-28-1, ILK-2, P59, p59ILK, ILK                                                              |
| IRAK2   | pseudokinase | yes | n | HGNC:6113  | IRAK-2                                                                                           |
| ITK     | kinase       | yes | n | HGNC:6171  | EMT, PSCTK2, LYK, LPFS1                                                                          |
| KALRN   | kinase       | no  | n | HGNC:4814  | duo, Hs.8004, TRAD, DUET, Kalirin, ARHGEF24, trad                                                |
| KSR1    | pseudokinase | yes | n | HGNC:6465  | RSU2, KSR                                                                                        |
| KSR2    | pseudokinase | yes | n | HGNC:18610 | FLJ25965                                                                                         |
| LATS1   | kinase       | yes | n | HGNC:6514  | WARTS, wts                                                                                       |
| LATS2   | kinase       | yes | n | HGNC:6515  | KPM                                                                                              |
| LMTK2   | kinase       | no  | n | HGNC:17880 | KIAA1079, KPI2, KPI-2, cprk, LMR2, BREK, AATYK2, PPP1R100                                        |
| LMTK3   | kinase       | no  | n | HGNC:19295 | KIAA1883, LMR3, TYKLM3, PPP1R101                                                                 |
| LRRK1   | kinase       | no  | n | HGNC:18608 | FLJ23119, KIAA1790, Roco1, RIPK6                                                                 |
| MAK     | kinase       | yes | n | HGNC:6816  | dJ417M14.2, RP62                                                                                 |
| MAP2K3  | kinase       | yes | n | HGNC:6843  | MAPKK3, MEK3, MKK3, PRKMK3, SAPKK-2, SAPKK2<br>JNKK, JNKK1, MAPKK4, MEK4, MKK4, PRKMK4, SAPKK-1, |
| MAP2K4  | kinase       | yes | n | HGNC:6844  | SAPKK1, SEK1, SERK1, SKK1                                                                        |
| MAP2K6  | kinase       | yes | n | HGNC:6846  | MEK6, MKK6, SAPKK3, MAPKK6<br>JNKK2, MAPKK7, MEK, MEK 7, MKK7, PRKMK7, SAPKK-4,                  |
| MAP2K7  | kinase       | yes | n | HGNC:6847  | SAPKK4                                                                                           |
| MAP3K10 | kinase       | yes | n | HGNC:6849  | MST, MEKK10, MLK2                                                                                |
| MAP3K11 | kinase       | yes | n | HGNC:6850  | SPRK, MEKK11, MLK-3, MLK3, PTK1                                                                  |
| MAP3K12 | kinase       | yes | n | HGNC:6851  | MUK, DLK, ZPKP1, MEKK12                                                                          |
| MAP3K13 | kinase       | yes | n | HGNC:6852  | LZK, MEKK13, MLK                                                                                 |
| MAP3K15 | kinase       | yes | n | HGNC:31689 | bA723P2.3, FLJ16518, ASK3, MAP3K7                                                                |
| MAP3K2  | kinase       | yes | n | HGNC:6854  | MEKK2B, MEKK2                                                                                    |
| MAP3K21 | kinase       | yes | n | HGNC:29798 | MLK4; KIAA1804; dJ862P8.3                                                                        |
| MAP3K3  | kinase       | yes | n | HGNC:6855  | MAPKKK3, MEKK3                                                                                   |
| MAP3K4  | kinase       | yes | n | HGNC:6856  | MTK1, MAPKKK4, KIAA0213, MEKK4                                                                   |
| MAP3K6  | kinase       | yes | n | HGNC:6858  | MAPKKK6, ASK2, MEKK6                                                                             |

|        |              |     |   |             |                                                                                                    |
|--------|--------------|-----|---|-------------|----------------------------------------------------------------------------------------------------|
| MAP3K8 | kinase       | yes | n | HGNC:6860   | AURA2, COT, EST, ESTF, MEKK8, TPL2, Tpl-2, c-COT                                                   |
| MAP4K1 | kinase       | yes | n | HGNC:6863   | HPK1                                                                                               |
| MAP4K5 | kinase       | yes | n | HGNC:6867   | KHS1, GCKR, KHS, MAPKKKK5                                                                          |
| MAPK4  | kinase       | yes | n | HGNC:6878   | Erk3-related, Erk4, ERK-4, ERK4, PRKM4, p63-MAPK, p63MAPK                                          |
| MARK1  | kinase       | yes | n | HGNC:6896   | MARK, PAR-1C, Par-1c, Par1c                                                                        |
| MARK3  | kinase       | yes | n | HGNC:6897   | CTAK1, KP78, PAR-1A, PAR1A, Par-1a                                                                 |
| MARK4  | kinase       | yes | n | HGNC:13538  | Nbla00650, FLJ90097, KIAA1860, PAR-1D, MARK4LS, MARKL1, MARKL1L                                    |
| MAST1  | kinase       | yes | n | HGNC:19034  | SAST, KIAA0973, SAST170                                                                            |
| MAST2  | kinase       | no  | n | HGNC:19035  | MAST205, KIAA0807, MTSSK                                                                           |
| MAST3  | kinase       | no  | n | HGNC:19036  | KIAA0561                                                                                           |
| MAST4  | kinase       | no  | n | HGNC:19037  | KIAA0303                                                                                           |
| MASTL  | kinase       | no  | n | HGNC:19042  | FLJ14813, THC2, Gwl, GREATWALL, GW, GWL, MAST-L, HYLTK, CTK, HYL, Lsk, CHK, HHYLTK, DKFZp434N1212, |
| MATK   | kinase       | yes | n | HGNC:6906   | MGC1708, MGC2101                                                                                   |
| MKNK1  | kinase       | yes | n | HGNC:7110   | MNK1                                                                                               |
| MKNK2  | kinase       | yes | n | HGNC:7111   | MNK2, GRPK7                                                                                        |
| MLKL   | pseudokinase | yes | n | HGNC:26617  | FLJ34389, hMLKL                                                                                    |
| MOK    | kinase       | yes | n | HGNC:9833   | RAGE1, STK30, RAGE, RAGE-1                                                                         |
| MOS    | kinase       | yes | n | HGNC:7199   | MSV                                                                                                |
| MST1R  | kinase       | yes | n | HGNC:7381   | CDw136, CD136, NPCA3, PTK8, RON                                                                    |
| MYLK3  | kinase       | yes | n | HGNC:29826  | MLCK; MLCK2; caMLCK                                                                                |
| MYO3A  | kinase       | yes | n | HGNC:7601   | DFNB30                                                                                             |
| MYO3B  | kinase       | yes | n | HGNC:15576  |                                                                                                    |
| NEK1   | kinase       | yes | n | HGNC:7744   | NY-REN-55, KIAA1901, SRPS2, SRPS2A, SRTD6                                                          |
| NEK11  | kinase       | yes | n | HGNC:18593  | FLJ23495                                                                                           |
| NEK3   | kinase       | yes | n | HGNC:7746   | HSPK36, MGC29949                                                                                   |
| NEK4   | kinase       | yes | n | HGNC:11399  | NRK2, pp12301, STK2                                                                                |
| NEK5   | kinase       | yes | n | HGNC:7748   |                                                                                                    |
| NEK7   | kinase       | yes | n | HGNC:13386  |                                                                                                    |
| NEK8   | kinase       | yes | n | HGNC:13387  | NPHP9, JCK, NEK12A, RHPD2                                                                          |
| NIM1K  | kinase       | yes | n | HGNC:28646  | MGC42105, NIM1                                                                                     |
| NPR1   | pseudokinase | no  | n | HGNC:7943   | GUCY2A, ANPa, A1893888, GC-A, NPR-A, NPRA, Pndr, GUCY2B, ANPb, AMDM, ANPRB, ECDM, GUC2B, NPRB,     |
| NPR2   | pseudokinase | no  | n | HGNC:7944   | NPRBi, SNSK                                                                                        |
| NRBP1  | pseudokinase | no  | n | HGNC:7993   | BCON3, MUDPNP, MADM, NRBP                                                                          |
| NRBP2  | pseudokinase | no  | n | HGNC:19339  | DKFZp434P086, TRG16, pp9320                                                                        |
| NRK    | kinase       | no  | n | HGNC:25391  | DKFZp686A17109, NESK, NRK/ZC4                                                                      |
| OBSCN  | kinase       | no  | n | HGNC:15719  | KIAA1556, UNC89, KIAA1639, ARHGEF30                                                                |
| OXSR1  | kinase       | yes | n | HGNC:8508   | OSR1                                                                                               |
| PASK   | kinase       | yes | n | HGNC:17270  | PASKIN, KIAA0135, STK37                                                                            |
| PBK    | kinase       | yes | n | HGNC:18282  | TOPK, FLJ14385, Nori-3, SPK, CT84, HEL164                                                          |
| PDIK1L | kinase       | no  | n | HGNC:18981  | CLIK1L, STK35L2                                                                                    |
| PEAK1  | pseudokinase | yes | n | HGNC:29431  | KIAA2002, sgk269, SGK269                                                                           |
| PHKG2  | kinase       | yes | n | HGNC:8931   | GSD9C                                                                                              |
| PINK1  | kinase       | yes | n | HGNC:14581  | BRPK, PARK6                                                                                        |
| PKDCC  | kinase       | no  | n | HGNC:25123  | Sgk493, "vertebrate lonesome kinase", Vlk, SGK493                                                  |
| PKMYT1 | kinase       | yes | n | HGNC:29650  | MYT1, PPP1R126                                                                                     |
| PKN1   | kinase       | yes | n | HGNC:9405   | DBK, PRK1, PKN, MGC46204, PAK1, PAK-1, PKN-ALPHA, PRKCL1                                           |
| PKN3   | kinase       | yes | n | HGNC:17999  | PKNbeta, UTDP4-1                                                                                   |
| PNCK   | kinase       | yes | n | HGNC:13415  | MGC45419, CaMK1b, BSTK3                                                                            |
| POMK   | pseudokinase | no  | n | HGNC:26267  | FLJ23356, Sgk196, MDDGA12, MDDGC12, SGK196                                                         |
| PRAG1  | pseudokinase | no  | n | HGNC:157285 | NACK, PEAK2, PRAGMIN, SGK223, Sgk223                                                               |
| PRKAA1 | kinase       | yes | n | HGNC:9376   | AMPKa1, AMPK-alpha1, AI194361, AI450832, AL024255, AMPKalpha1, C130083N04Rik                       |

|         |              |     |   |            |                                                                                    |
|---------|--------------|-----|---|------------|------------------------------------------------------------------------------------|
| PRKACA  | kinase       | yes | n | HGNC:9380  | PKACa, PKACA, PPNAD4                                                               |
| PRKACB  | kinase       | yes | n | HGNC:9381  | PKACb, PKA C-beta, PKACB                                                           |
| PRKACG  | kinase       | yes | n | HGNC:9382  | PKACg, BDPLT19, KAPG                                                               |
| PRKCI   | kinase       | yes | n | HGNC:9404  | PKCI, DXS1179E, nPKC-iota, PKCi                                                    |
| PRKCZ   | kinase       | yes | n | HGNC:9412  | PKC2, PKC-ZETA, PKCz                                                               |
| PRKDC   | kinase       | yes | n | HGNC:9413  | DNPK1, p350, DNAPK, XRCC7, DNA-PKcs, HYRC, HYRC1, IMD26                            |
| PRKG1   | kinase       | yes | n | HGNC:9414  | PGK, PKG, AAT8, PKGB, PRKGR1B, cGK, cGK 1, cGK1, cGKI, cGKI-BETA, cGKI-alpha, PKG1 |
| PRKY    | kinase       | no  | n | HGNC:9444  | PRKYP, PRKXP3, PRKY, PRKXP3P                                                       |
| PRPF4B  | kinase       | yes | n | HGNC:17346 | PR4H; PRP4; PRP4H; PRP4K; dj1013A10.1                                              |
| PSKH1   | kinase       | no  | n | HGNC:9529  |                                                                                    |
| PSKH2   | pseudokinase | no  | n | HGNC:18997 |                                                                                    |
| PTK7    | pseudokinase | no  | n | HGNC:9618  | CCK4, CCK-4                                                                        |
| PXK     | pseudokinase | no  | n | HGNC:23326 | FLJ20335, MONaKa, Slob                                                             |
| RIOK1   | kinase       | yes | n | HGNC:18656 | AD034, FLJ30006, bA288G3.1, RRP10                                                  |
| RIOK3   | kinase       | yes | n | HGNC:11451 | SUDD                                                                               |
| RIPK1   | kinase       | yes | n | HGNC:10019 | RIP, RIP-1, RIP1                                                                   |
| RIPK3   | kinase       | yes | n | HGNC:10021 | RIP3, Rip3                                                                         |
| RIPK4   | kinase       | yes | n | HGNC:496   | DIK, ANKK2, RIP4, PKK, ANKRD3, NKRD3, PPS2                                         |
| RNASEL  | kinase       | no  | n | HGNC:10050 | PRCA1, RNS4                                                                        |
| ROR1    | kinase       | yes | n | HGNC:10256 | NTRKR1, dj537F10.1                                                                 |
| ROR2    | kinase       | yes | n | HGNC:10257 | BDB, BDB1, NTRKR2                                                                  |
| ROS1    | kinase       | yes | n | HGNC:10261 | MCF3, ROS, c-ros-1                                                                 |
| RPS6KC1 | pseudokinase | no  | n | HGNC:10439 | humS6PKh1, RPK118, RSKL1, S6K-delta-1, S6PKh1                                      |
| RPS6KL1 | pseudokinase | no  | n | HGNC:20222 | MGC11287, RSKL2                                                                    |
| RYK     | kinase       | no  | n | HGNC:10481 | D3S3195, RYK1, JTK5, JTK5A1, RYK                                                   |
| SBK2    | kinase       | no  | n | HGNC:34416 | SGK069                                                                             |
| SBK3    | kinase       | yes | n | HGNC:44121 | SGK110                                                                             |
| SCYL1   | pseudokinase | no  | n | HGNC:14372 | HT019, P105, GKLP, NKTL, TAPK, TRAP, TEIF, MGC78454, NTKL, SCAR21                  |
| SCYL2   | pseudokinase | no  | n | HGNC:19286 | KIAA1360, CVAK104                                                                  |
| SCYL3   | pseudokinase | no  | n | HGNC:19285 | PACE-1, PACE1                                                                      |
| SGK2    | kinase       | yes | n | HGNC:13900 | H-SGK2, dj138B7.2                                                                  |
| SGK3    | kinase       | yes | n | HGNC:10812 | CISK, SGK2, SGKL                                                                   |
| SGK494  | kinase       | no  | n | HPRD:08680 | gene bank Acc. No. NM_144610                                                       |
| SIK1    | kinase       | yes | n | HGNC:11142 | MSK; SIK; SIK-1; SNF1LK                                                            |
| SIK3    | kinase       | yes | n | HGNC:29165 | FLJ12240, L19, KIAA0999, QSK, SIK, SIK-3                                           |
| SMG1    | kinase       | no  | n | MIM:607032 | ATX; LIP; 61E3.4                                                                   |
| SNRK    | kinase       | yes | n | HGNC:30598 | FLJ20224, HSNFRK, KIAA0096                                                         |
| SPEG    | kinase       | no  | n | HGNC:16901 | BPEG; CNM5; APEG1; APEG-1; SPEGbeta; SPEGalpha                                     |
| SRMS    | kinase       | yes | n | HGNC:11298 | SRM, dj697K14.1, PTK70, C20orf148                                                  |
| SRPK1   | kinase       | yes | n | HGNC:11305 | SFRSK1                                                                             |
| SRPK2   | kinase       | yes | n | HGNC:11306 | SFRSK2                                                                             |
| SRPK3   | kinase       | yes | n | HGNC:11402 | MSSK1, MSSK-1, STK23                                                               |
| STK11   | kinase       | yes | n | HGNC:11389 | PJS, LKB1, hLKB1                                                                   |
| STK19   | kinase       | yes | n | HGNC:11398 | G11; RP1; D6S60; D6S60E; HLA-RP1                                                   |
| STK3    | kinase       | yes | n | HGNC:11406 | MST2, KRS1                                                                         |
| STK31   | pseudokinase | no  | n | HGNC:11407 | TDRD8, SgK396, SGK396                                                              |
| STK32A  | kinase       | yes | n | HGNC:28317 | MGC22688, YANK1                                                                    |
| STK32B  | kinase       | yes | n | HGNC:14217 | STKG6, YANK2, STK32, HSA250839                                                     |
| STK32C  | kinase       | yes | n | HGNC:21332 | PKE, MGC23665, YANK3                                                               |
| STK38   | kinase       | yes | n | HGNC:17847 | NDR, NDR1                                                                          |
| STK38L  | kinase       | yes | n | HGNC:17848 | KIAA0965, NDR2                                                                     |
| STK39   | kinase       | yes | n | HGNC:17717 | DCHT, SPAK, PASK, STLK3                                                            |
| STK4    | kinase       | yes | n | HGNC:11408 | MST1, KRS2, YSK3                                                                   |
| STK40   | pseudokinase | no  | n | HGNC:21373 | MGC4796, SgK495, SHIK                                                              |

|        |              |     |   |            |                                                                                                                                         |
|--------|--------------|-----|---|------------|-----------------------------------------------------------------------------------------------------------------------------------------|
| STKLD1 | pseudokinase | no  | n | HGNC:28669 | MGC43306, SGK071, C9orf96, SgK071, Sk521                                                                                                |
| STRADA | pseudokinase | no  | n | HGNC:30172 | LYK5; PMSE; Stlk; STRAD; NY-BR-96; STRAD alpha, STLK5 STRAD beta; CALS-21, PAPK, ILPIPA, ILPIP, ALS2CR2,                                |
| STRADB | pseudokinase | no  | n | HGNC:13205 | PRO1038, STLK6                                                                                                                          |
| STYK1  | pseudokinase | no  | n | HGNC:18889 | SuRTK106, DKFZp761P1010, NOK OF; XDP; BA2R; CCG1; CCGS; DYT3; KAT4; P250; NSCL2; TAF2A; MRXS33; N-TAF1; TAFII250; DYT3/TAF1; TAFII-250; |
| TAF1   | kinase       | no  | n | HGNC:11535 | TAF(II)250 KIAA1361, MARKK, PSK2, MAP3K16, FLJ14314, TAO1, KFC-B,                                                                       |
| TAOK1  | kinase       | yes | n | HGNC:29259 | PSK-2, hKFC-B, hTAOK1                                                                                                                   |
| TAOK2  | kinase       | yes | n | HGNC:16835 | KIAA0881, PSK, PSK1, TAO2, MAP3K17, PSK1-BETA                                                                                           |
| TAOK3  | kinase       | yes | n | HGNC:18133 | JIK, DPK, MAP3K18, hKFC-A, TAO3                                                                                                         |
| TBCK   | pseudokinase | no  | n | HGNC:28261 | HSPC302, MGC16169, IHPRF3L                                                                                                              |
| TEC    | kinase       | yes | n | HGNC:11719 | PSCTK4                                                                                                                                  |
| TESK1  | kinase       | yes | n | HGNC:11731 |                                                                                                                                         |
| TESK2  | kinase       | yes | n | HGNC:11732 |                                                                                                                                         |
| TEX14  | pseudokinase | no  | n | HGNC:11737 | CT113, SgK307                                                                                                                           |
| TGFBR2 | kinase       | yes | n | HGNC:11773 | JTK14, AAT3, FAA3, LDS1B, LDS2, LDS2B, MFS2, RIIC, TAAD2,                                                                               |
| TIE1   | kinase       | yes | n | HGNC:11809 | TGFR-2, TGFbeta-RII, TIE                                                                                                                |
| TLK1   | kinase       | yes | n | HGNC:11841 | KIAA0137, PKU-BETA                                                                                                                      |
| TLK2   | kinase       | yes | n | HGNC:11842 | PKU-ALPHA, MGC44450, HsHPK PRPK, dJ101A2.2, prpk, Nori-2p, BUD32, C20orf64, Nori-2,                                                     |
| TP53RK | kinase       | no  | n | HGNC:16197 | PRPKdj101A2                                                                                                                             |
| TRIB1  | pseudokinase | no  | n | HGNC:16891 | C8FW, GIG2, TRB1, GIG-2, SKIP1, TRB-1                                                                                                   |
| TRIB2  | pseudokinase | no  | n | HGNC:30809 | TRB2, GS3955, C5FW                                                                                                                      |
| TRIB3  | pseudokinase | no  | n | HGNC:16228 | dJ1103G7.3, TRB3, C20orf97, NIPK, SINK, SKIP3                                                                                           |
| TRIO   | kinase       | yes | n | HGNC:12303 | ARHGEF23, MEBAS, MRD44, tgat                                                                                                            |
| TRPM6  | kinase       | yes | n | HGNC:17995 | CHAK2, FLJ22628, HMGX, HOMG, HOMG1, HSH                                                                                                 |
| TRPM7  | kinase       | yes | n | HGNC:17994 | CHAK1, LTRPC7, TRP-PLIK, CHAK, ALSPDC, LTrpC-7                                                                                          |
| TRRAP  | pseudokinase | no  | n | HGNC:12347 | TR-AP, PAF400, Tra1, PAF350/400, STAF40                                                                                                 |
| TSSK3  | kinase       | yes | n | HGNC:15473 | SPOGA3, STK22C, STK22D, TSK3                                                                                                            |
| TSSK4  | kinase       | yes | n | HGNC:19825 | C14orf20, STK22E, TSK-4, TSK4, TSSK5                                                                                                    |
| TSSK6  | kinase       | yes | n | HGNC:30410 | SSTK, FLJ24002, CT72, FKSG82, TSSK4                                                                                                     |
| TTBK1  | kinase       | yes | n | HGNC:19140 | KIAA1855, BDTK                                                                                                                          |
| TTBK2  | kinase       | yes | n | HGNC:19141 | KIAA0847, SCA11, TTBK CMPD4, FLJ32040, TMD, CMH9, LGMD2J, MYLK5, CMD1G                                                                  |
| TTN    | kinase       | no  | n | HGNC:12403 | EOMFC, HMERF                                                                                                                            |
| TXK    | kinase       | yes | n | HGNC:12434 | TKL, PSCTK5, BTKL, RLK, PTK4, Rik                                                                                                       |
| TYRO3  | kinase       | yes | n | HGNC:12446 | BYK; Dtk; RSE; Rek; Sky; Tif; Etk-2                                                                                                     |
| UHMK1  | kinase       | no  | n | HGNC:19683 | KIS, Kist, KIST, P-CIP2                                                                                                                 |
| ULK3   | kinase       | yes | n | HGNC:19703 | DKFZP434C131, FLJ90566                                                                                                                  |
| ULK4   | pseudokinase | no  | n | HGNC:15784 | FLJ20574, REC01035, FAM7C1                                                                                                              |
| VRK1   | kinase       | yes | n | HGNC:12718 | PCH1, PCH1A                                                                                                                             |
| VRK2   | kinase       | yes | n | HGNC:12719 |                                                                                                                                         |
| VRK3   | pseudokinase | no  | n | HGNC:18996 |                                                                                                                                         |
| WEE2   | kinase       | yes | n | HGNC:19684 | WEE1B                                                                                                                                   |
|        |              |     |   |            | gene bank                                                                                                                               |
|        |              |     |   |            | Acc. No                                                                                                                                 |
| STK424 | pseudokinase | no  | n | XM_375602  |                                                                                                                                         |

0
